# Supplementary material for: Arachidonic acid enhances hepatocyte bile acid uptake and alleviates cholestatic liver disease by upregulating OATP1 expression
Source: Royal Society of Chemistry journal article supplement (doi:10.1039/d4fo02158d), 2024-01-01
Supplement: d4fo02158d1.pdf [file d4fo02158d1.pdf]

Supplementary materials

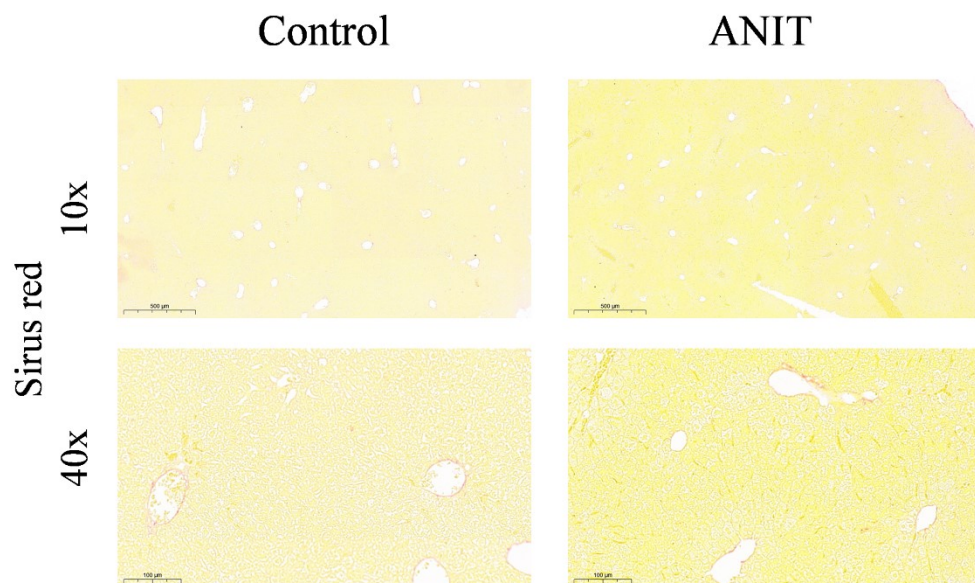

Fig S1 Representative images of hepatic Sirius red staining. Scale bar 500  $\mu\text{m}$  and 100  $\mu\text{m}$ .
