# Supplementary material for: Arachidonic acid enhances hepatocyte bile acid uptake and alleviates cholestatic liver disease by upregulating OATP1 expression
Source: Royal Society of Chemistry journal article supplement (doi:10.1039/d4fo02158d), 2024-01-01
Supplement: d4fo02158d2.xlsx [file d4fo02158d2.xlsx]

## Sheet: 标品信息表
cid	cidlink	number	Chinese name	English name	Molecular formula	CAS	Molecular weight	factory	Art.No.	pureness	Q1	Q3	RT	Ion mode
45866	http://funmeta.oebiotech.com/network/45866	1	石胆酸	Lithocholic Acid(LCA)	C24H40O3	434-13-9	376.3	甄准	ZC-51694	/	375.3	375.3	18.55	NEG
45895	http://funmeta.oebiotech.com/network/45895	2	鹅去氧胆酸	Chenodeoxycholic Acid(CDCA)	C24H40O4	474-25-9	392.3	甄准	ZC-57223	HPLC≥98%	437.3	391.4	14.95	NEG
45903	http://funmeta.oebiotech.com/network/45903	3	去氧胆酸	Deoxycholic Acid(DCA)	C24H40O4	83-44-3	392.3	甄准	ZC-53569	/	391.4	343.4	15.9	NEG
45896	http://funmeta.oebiotech.com/network/45896	4	熊去氧胆酸	Ursodeoxycholic Acid(UDCA)	C24H40O4	128-13-2	392.3	源叶	IR-15403	/	391.3	391.3	8.23	NEG
45864	http://funmeta.oebiotech.com/network/45864	5	胆酸	Cholic Acid(CA)	C24H40O5	81-25-4	408.3	甄准	IR-15659	/	453.3	407.4	8.74	NEG
46733	http://funmeta.oebiotech.com/network/46733	6	甘氨石胆酸	Lithocholic Acid Glycine Conjugate(GLCA)	C26H43NO4	474-74-8	433.3	甄准	ZS-20046	/	432.2	432.2	16.25	NEG
47131	http://funmeta.oebiotech.com/network/47131	7	甘氨脱氧胆酸	Deoxycholic Acid Glycine Conjugate(GDCA)	C26H43NO5	360-65-6	449.3	甄准	ZC66557	/	448.3	448.3	10.28	NEG
46732	http://funmeta.oebiotech.com/network/46732	8	甘氨鹅脱氧胆酸	Chenodeoxycholic Acid Glycine Conjugate(GCDCA)	C26H43NO5	640-79-9	449.3	甄准	IR-15586	/	448.3	448.3	9.15	NEG
46738	http://funmeta.oebiotech.com/network/46738	9	甘氨熊脱氧胆酸	Glycoursodeoxycholic Acid(GUDCA)	C26H43NO5	64480-66-6	449.3	甄准	ZC-53831	/	448.3	448.3	4.82	NEG
46727	http://funmeta.oebiotech.com/network/46727	10	甘氨胆酸	Glycocholic Acid(GCA)	C26H43NO6	46738	465.3	甄准	ZC-53830	/	466.4	412.2	5.49	POS
46744	http://funmeta.oebiotech.com/network/46744	11	牛磺石胆酸	Lithocholyltaurine(TLCA)	C26H45NO5S	6042-32-6	483.3	源叶	S26225-20MG	HPLC≥97%	482.2	124	10.86	NEG
46754	http://funmeta.oebiotech.com/network/46754	12	牛磺熊去氧胆酸	Tauroursodeoxycholic Acid(TUDCA)	C26H45NO6S	14605-22-2	499.3	源叶	B20921-20MG	HPLC≥98%	498.1	498.1	3.76	NEG
558803	http://funmeta.oebiotech.com/network/558803	13	牛磺脱氧胆酸	Taurodeoxycholic Acid(TDCA)	C26H45NO6S	1180-95-6	499.3	源叶	S30708-1G	HPLC≥95%	498.1	498.1	6.77	NEG
46745	http://funmeta.oebiotech.com/network/46745	14	牛磺鹅脱氧胆酸	Taurochenodesoxycholic Acid(TCDCA)	C26H45NO6S	516-35-8	499.3	源叶	B20919-20MG	HPLC≥98%	498.1	498.1	6.05	NEG
46743	http://funmeta.oebiotech.com/network/46743	15	牛磺胆酸	Taurocholic Acid(TCA)	C26H45NO7S	81-24-3	515.3	源叶	B26949-200MG		514.1	514.1	3.9	NEG
45869	http://funmeta.oebiotech.com/network/45869	16	表别石胆酸	Epiallolithocholic Acid(EALCA)	C24H40O3	2276-93-9	376.6	甄准	ZS-20054	/	375.3	375.3	18.39	NEG
46595	http://funmeta.oebiotech.com/network/46595	17	23-脱甲胆酸	23-Norcholic Acid(NCA)	C23H38O5	60696-62-0	394.548	甄准	ZS-20176	/	393.3	275.4	5.66	NEG
47187	http://funmeta.oebiotech.com/network/47187	18	猪去氧胆酸	Hyodeoxycholic Acid(HDCA)	C24H40O4	83-49-8	392.57	甄准	ZT-20663	/	391.4	391.4	9.54	NEG
45929	http://funmeta.oebiotech.com/network/45929	19	α-鼠胆酸	α Muricholic Acid(α-MCA)	C24H40O5	2393-58-0	408.6	甄准	ZS-20001	/	407.4	407.4	5.59	NEG
46017	http://funmeta.oebiotech.com/network/46017	20	12-酮基石胆酸	12-Ketolithocholic Acid(12-KLCA)	C24H38O4	5130-29-0	390.56	甄准	ZS-20056	/	391.2	355.3	10.09	POS
257682	http://funmeta.oebiotech.com/network/257682	21	甘氨猪脱氧胆酸	Glycohyodeoxycholic Acid(GHDCA)	C26H43NO5	13042-33-6	449.6	源叶	S25044-20MG	/	448.2	448.2	5.351	NEG
		22	6,7-二酮石胆酸	6,7-Diketolithocholic Acid(6,7-DLCA)	C24H36O5	1643669-23-1	404.5	Avanti	700234p-1mg	HPLC≥97%	405.2	369.3	9.029	POS
46750	http://funmeta.oebiotech.com/network/46750	23	牛磺猪胆酸	Taurohyocholic Acid(THCA)	C26H45NO7S	32747-07-2	515.7	甄准	ZS-20025	/	514.2	514.2	3.3	NEG
45930	http://funmeta.oebiotech.com/network/45930	24	β-鼠胆酸	β-Muricholic Acid(β-MCA)	C24H40O5	2393-59-1	408.6	甄准	ZS-20003	/	453.3	407.4	5.95	NEG
212199	http://funmeta.oebiotech.com/network/212199	25	牛磺-α-鼠胆酸	Tauro-α-Muricholic Acid(α-TMCA)	C26H45NO7S	25613-05-2	515.703	源叶	B74540-1MG	/	514.2	514.2	2.75	NEG
551152	http://funmeta.oebiotech.com/network/551152	26	甘氨熊胆酸	Glycoursocholanic Acid(GUCA)	C26H43NO3	95093-95-1	417.6	甄准	ZS-20011	/	416.2	74.1	18.93	NEG
		27	7,12-二酮石胆酸	7,12-Diketolithocholic Acid(7,12-DKLCA)	C24H36O5	517-33-9	404.5	甄准	ZS-20059	/	405.2	351.2	3.38	POS
551143	http://funmeta.oebiotech.com/network/551143	28	牛磺猪脱氧胆酸	Taurohyodeoxycholic Acid(THDCA)	C26H45NO6S	38411-85-7	499.3	甄准	ZS-20026	/	498	80	3.76	NEG
197244	http://funmeta.oebiotech.com/network/197244	29	甘氨猪胆酸	Glycohyocholic Acid(GCHCA)	C26H43NO6	32747-08-3	465.6	甄准	ZS-20022	/	464.3	464.3	4.48	NEG
45968	http://funmeta.oebiotech.com/network/45968	30	脱氢胆酸	Dehydrocholic Acid(DHCA)	C24H34O5	81-23-2	402.52	甄准	D229340	/	401.2	331.3	3.06	NEG
45898	http://funmeta.oebiotech.com/network/45898	31	3β-熊去氧胆酸	3β-Ursodeoxycholic Acid(3β-UDCA)	C24H40O4	78919-26-3	392.6	甄准	U850005	/	391.3	391.3	7.46	NEG
47047	http://funmeta.oebiotech.com/network/47047	32	7-酮基石胆酸	7-Ketolithocholic Acid(7-KLCA)	C24H38O4	4651-67-6	390.556	甄准	ZS20055	/	391.2	355.2	7.84	POS
45948	http://funmeta.oebiotech.com/network/45948	33	3β胆酸	3β-Cholic Acid(3β-CA)	C24H40O5	3338-16-7	408.6	甄准	C432605	/	453.3	407.4	5.31	NEG
45950	http://funmeta.oebiotech.com/network/45950	34	熊果胆酸	Ursocholic Acid(UCA)	C24H40O5	2955-27-3	408.6	源叶	B22360-5MG	HPLC≥98%	407.4	407.4	3.91	NEG
45888	http://funmeta.oebiotech.com/network/45888	35	鼠脱氧胆酸	Murideoxycholic Acid(M-DCA)	C24H40O4	668-49-5	392.6	甄准	ZS-20171	/	437.3	391.4	7.21	NEG
47206	http://funmeta.oebiotech.com/network/47206	36	猪胆酸	Hyocholic Acid (HCA)	C24H40O5	547-75-1	408.57	甄准	ZC-26210	/	409.3	373.3	7.65	POS
45954	http://funmeta.oebiotech.com/network/45954	37	异胆酸	Allocholic Acid(ALCA)	C24H40O5	2464-18-8	408.6	甄准	A545000	/	407.4	407.4	9.09	NEG
47305	http://funmeta.oebiotech.com/network/47305	38	牛磺-β-鼠胆酸钠盐	Tauro-β-Muricholic Acid (Sodium Salt)(β-TMCA-Na)	C26H44NNaO7S	25696-60-0	537.7	源叶	B27767-1MG	HPLC≥95%	514.2	514.2	2.76	NEG
		39	Nor-脱氧胆酸	Nor-Desoxycholic Acid(23-Nor-DCA)	C23H38O4	53608-86-9	378.55	甄准	ZS-20171	HPLC≥98%	377.4	377.4	11.5	NEG
		40	牛磺石胆酸-3-硫酸盐	taurolithocholic acid-3-sulfate	C26H43NNa2O8S2	64936-83-0	607.223	甄准	ZS-21520	/	584.2	464.4	4.26	NEG
		41	脱氢石胆酸	Dehydrolithocholic acid	C24H38O3	1553-56-6	374.282	皓元	HY-125801	/	373.1	373.2	18.52	NEG
46030	http://funmeta.oebiotech.com/network/46030	42	3-氧代脱氧胆酸	3-oxodeoxycholic acid	C24H38O4	4185-01-7	390.3	皓元	HY-W391635	/	389.2	389.4	13.03	NEG
45905	http://funmeta.oebiotech.com/network/45905	43	别脱氧胆酸	3β-deoxycholic acid	C24H40O4	570-63-8	392.3	甄准	ZS-20121	/	390.9	391.2	10.42	NEG
46294	http://funmeta.oebiotech.com/network/46294	44	3-氧代胆酸	3-Oxocholic acid	C24H38O5	2304-89-4	406.3	皓元	HY-N7387	/	405.1	405.3	6.66	NEG
46038	http://funmeta.oebiotech.com/network/46038	45	12-氧代鹅去氧胆酸	12-Oxochenodeoxycholic acid	C24H38O5	2458-08-4	406.3	甄准	ZS-20186	/	407.3	353.2	5.32	POS
46679	http://funmeta.oebiotech.com/network/46679	46	石胆酸-3-硫酸盐	lithocholic acid-3-sulfate	C24H40O6S	34669-57-3	456.25	甄准	IR-15705	/	455.1	455.3	12.65	NEG
		47	甘氨脱氢胆酸	Glycodehydrocholic acid	C26H37NO6	3415-45-0	459.262	甄准	ZS-20161	/	458	458.4	2.35	NEG
212200	http://funmeta.oebiotech.com/network/212200	48	牛磺脱氢胆酸	Taurodehydrocholic acid	C26H38NNaO7S	57011-24-2	531.227	甄准	ZS-20160	/	507.6	508.2	2	NEG
46728	http://funmeta.oebiotech.com/network/46728	49	甘氨石胆酸-3-硫酸盐	glycolithocholic acid-3-sulfate	C26H43NO7S	15324-64-8	513.276	皓元	HY-113074	/	512	432.4	7.54	NEG
541713	http://funmeta.oebiotech.com/network/541713	50	5-β-胆酸-3α-醇-6-酮	5-β-Cholanic Acid-3α-ol-6-one	C24H38O4	2393-61-5	390.3	甄准	ZS-20212	/	389.1	389.2	8.59	NEG
46701	http://funmeta.oebiotech.com/network/46701	51	胆酸7硫酸盐	cholic acid 7 sulfate	C24H40O8S	60320-05-0	488.244	甄准	ZS-21535	/	487	487.1	4.27	NEG
46736	http://funmeta.oebiotech.com/network/46736	52	甘熊去氧胆酸3硫酸钠盐	Glycoursodeoxycholic Acid 3 Sulfate Sodium	C26H43NO8S	133429-88-6	529.271	甄准	IR-15693	/	528.2	448.3	2.934	NEG
46046	http://funmeta.oebiotech.com/network/46046	53	7-酮基脱氧胆酸	7-Ketodeoxycholic acid	C24H38O5	911-40-0	406.3	皓元	HY-41324	/	404.9	405.4	5.02	NEG
