# Supplementary material for: Arachidonic acid enhances hepatocyte bile acid uptake and alleviates cholestatic liver disease by upregulating OATP1 expression
Source: Royal Society of Chemistry journal article supplement (doi:10.1039/d4fo02158d), 2024-01-01
Supplement: d4fo02158d3.xlsx [file d4fo02158d3.xlsx]

## Sheet: 20230926 Report
PG.Qvalue	PG.Cscore	PG.MolecularWeight	PG.ProteinGroups	PG.Genes	PG.ProteinDescriptions	[1] A3.raw.PG.Quantity	[2] A4.raw.PG.Quantity	[3] A5.raw.PG.Quantity	[4] A6.raw.PG.Quantity	[5] AH1.raw.PG.Quantity	[6] AH2.raw.PG.Quantity	[7] AH3.raw.PG.Quantity	[8] AH4.raw.PG.Quantity	[9] D2.raw.PG.Quantity	[10] D3.raw.PG.Quantity	[11] D4.raw.PG.Quantity	[12] D10.raw.PG.Quantity	[13] H1.raw.PG.Quantity	[14] H2.raw.PG.Quantity	[15] H6.raw.PG.Quantity	[16] H7.raw.PG.Quantity	[17] N1.raw.PG.Quantity	[18] N2.raw.PG.Quantity	[19] N3.raw.PG.Quantity	[20] N4.raw.PG.Quantity
0	1.1624	60594.6	A0JNU3	Aspg	60 kDa lysophospholipase	2.45086e+06	2.14073e+06	2.2975e+06	3.00701e+06	2.536e+06	2.30023e+06	2.39446e+06	2.19998e+06	1.00573e+06	1.10176e+06	889521	967427	1.86952e+06	2.07018e+06	1.90769e+06	2.52526e+06	1.87928e+06	2.03943e+06	1.84642e+06	1.92875e+06
0	1.11257	78390.5	A1L314	Mpeg1	Macrophage-expressed gene 1 protein	504665	345406	445718	328820	139855	324193	407856	377906	658055	820912	767102	781670	307364	239243	113690	325381	111379	126585	128994	273663
0	1.09199	110699	A2A432	Cul4b	Cullin-4B	72955.3	82749	75422.4	49167.7	64579.3	50561.5	45972.3	13301.1	130072	129174	119147	117368	86710.9	79472.7	32759	81681.6	102839	102042	106819	98727.8
0	1.11493	202240	A2A5R2	Arfgef2	Brefeldin A-inhibited guanine nucleotide-exchange protein 2	57156.8	80177.5	93826.8	82736.6	59972.7	73929.6	76520.7	82255.6	94174.6	108407	126469	104776	79281.3	79527.8	74569.2	85464.1	66922.6	68450.2	53622.1	81745.7
0	1.06089	86174.8	A2A5Z6	Smurf2	E3 ubiquitin-protein ligase SMURF2	704014	714160	732144	516795	576178	339530	439392	354049	701826	649342	584507	640418	682360	624594	680369	628516	596301	557560	524233	621939
0	1.12484	211489	A2A8L5	Ptprf	Receptor-type tyrosine-protein phosphatase F	53426.5	57177.9	50703	118408	188741	186517	157096	155071	88326.3	69336.9	40192	50370.8	145192	128396	125949	128700	156449	180751	188314	174863
0	1.08747	83109.5	A2A8Z1	Osbpl9	Oxysterol-binding protein-related protein 9	74885.4	73071.2	63658.4	62670.7	49068.8	55636.3	44826	47024.8	75446.1	76083.6	81724.1	81904.8	58213.1	62235.8	60763.3	57029.3	49394.9	55137.3	49862.7	52329.6
0	1.16761	58309.4	A2A974	Cyp4a12b	Cytochrome P450 4A12B	4.70357e+06	4.25657e+06	4.02723e+06	2.6058e+06	2.04962e+06	2939208	2.85915e+06	2.48712e+06	460000	300277	177646	414519	2.48174e+06	1.64302e+06	1.87578e+06	2.28425e+06	3.08644e+06	2.57059e+06	3856869	2.99451e+06
0	1.13824	44590.6	A2ADY9	Ddi2	Protein DDI1 homolog 2	323329	360332	338484	356306	345407	323533	303602	372602	285600	270109	238881	287010	283827	278272	277399	310652	297681	344247	280417	304306
0	1.13282	225635	A2AGT5	Ckap5	Cytoskeleton-associated protein 5	59798.3	61942.5	59721.4	57928.6	64428.5	56169.6	41152.9	46269.2	77015.8	76975.1	92137.8	81575.3	77273.9	77220.3	53105.6	61175.1	64244.3	62808.4	62566	59104.9
0	1.04867	93275.7	A2AJI0	Map7d1	MAP7 domain-containing protein 1	12695.6	22638.8	7863.57	4083.21	7906.04	4247.89	1952.41	5326.16	15209.6	13812.6	15360.3	15655.3	5934.55	2333.45	11297	3624.71	7155.16	371.314	3775.2	5968.49
0	1.15374	60336.4	A2AJL3	Fggy	FGGY carbohydrate kinase domain-containing protein	615945	574476	652746	878256	914388	1012943	885667	870682	636000	666244	633082	620323	787937	810341	761688	900073	753116	800311	765936	750988
0	1.15808	46070.5	A2AKK5	Acnat1	Acyl-coenzyme A amino acid N-acyltransferase 1	453604	464606	398655	495585	340456	396512	354970	360131	690812	750346	774626	903003	434207	502298	423736	478801	294528	305223	343611	276062
0	1.12584	39272.2	A2AKQ0	Slc35d1	UDP-glucuronic acid/UDP-N-acetylgalactosamine transporter	59100.4	49507.2	72425.1	89459.1	43961.5	50665	90796.7	78127	56993.8	68567.7	90604.6	70914.1	53942.6	64167.5	55757.1	63349.8	61029.7	71915	58297.6	58277
0	1.17202	572290	A2AN08	Ubr4	E3 ubiquitin-protein ligase UBR4	20431698	18402864	18511928	18546460	18348306	17910846	18629860	16816444	27133836	26295148	27934258	24541538	21288070	21271562	20360182	20512930	21125708	20912064	20442516	20486342
0	1.16711	38254.9	A2AS89	Agmat	Agmatinase, mitochondrial	1.7288e+06	1.87314e+06	1709238	1.46384e+06	1.36762e+06	1.25456e+06	1.37858e+06	1645149	1.72455e+06	2.00381e+06	1533317	1.90439e+06	1.89011e+06	2.18269e+06	1.87469e+06	1.49878e+06	2.50444e+06	2.6678e+06	2243774	2.48555e+06
0	1.07899	207539	A2ASQ1	Agrn	Agrin	32172.3	23949.5	32657.2	20456.7	24481.7	34605.6	26804.2	41160.3	65480	42230.5	65785.6	69742.7	27842.8	24624.2	18688.3	28492.9	30317.2	22699.9	26349.1	23429.8
0	1.15924	3.90649e+06	A2ASS6	Ttn	Titin	1.11089e+06	1.17228e+06	1.1112e+06	1.28159e+06	1305580	1.31894e+06	1.37676e+06	1611112	940349	944579	1.06038e+06	947395	961169	938115	874292	975966	795519	857510	803216	733355
0	1.13991	52621	A2ASZ8	Slc25a25	Calcium-binding mitochondrial carrier protein SCaMC-2	142692	175896	202098	76754.1	94612.4	84377.1	91042.3	85207.7	69495.4	64680.6	57161.8	57769.8	78726.8	72250.3	68210.1	72025.2	70292.4	80920.6	86021.3	109357
0	1.14149	102793	A2ATU0	Dhtkd1	2-oxoadipate dehydrogenase complex component E1	408050	481798	541625	332340	267049	297731	324199	241686	611977	747128	529205	605396	443520	638021	524146	624939	451026	540183	530382	661066
0	1.06425	120798	A2AWA9	Rabgap1	Rab GTPase-activating protein 1	283187	299809	89026.9	126847	107236	136981	88832.7	187519	189573	183986	183244	187810	103984	84297.1	113624	88716	84602.2	116297	98693.2	127975
0	1.09786	49375	A2BDX3	Mocs3	Adenylyltransferase and sulfurtransferase MOCS3	58942.9	59811.1	47987.4	72986.6	85019.9	71018.6	74203	90418.5	83591.3	80889.8	81293.8	74907.7	88466.9	74153.4	64591.1	64347.6	69844.8	71064.1	59445.6	56140.2
0	1.0813	242092	A2BH40	Arid1a	AT-rich interactive domain-containing protein 1A	30705.5	31242.9	25885.9	24221	19796.8	26798.1	25375.5	35419	26436.2	24687.1	27665.6	25582.5	20278.8	19409.3	11935.6	20996.2	20978.1	16242.3	14503.9	21682.5
0	1.21343	20762.55;20649.39;20762.55	A2BIM8;P02762;P04938	Mup18;Mup6;Mup11	Major urinary protein 18;Major urinary protein 6;Major urinary protein 11	46078312	56384520	28793712	39762612	80812976	105884200	62929984	72270208	5.2468e+06	1.51561e+06	651897	776435	25600240	12574402	31572318	36450000	118864848	137416480	110385088	24064580
0	1.03489	144629	A2RSQ0	Dennd5b	DENN domain-containing protein 5B	43865.2	30674.7	43528.7	39697.9	38844.2	36097.7	39796.1	40512.6	46402	41615.1	35992.6	44866.3	30144.7	38828.4	28197.1	35498.8	28451.5	33207.4	36896.7	36024.9
0	1.09349	135899.35;136967.5;129416.73;143797.78;151954.75	A3FIN4;P98199;P98200;Q148W0;Q6UQ17	Atp8b5;Atp8b2;Atp8a2;Atp8b1;Atp8b3	Phospholipid-transporting ATPase FetA;Phospholipid-transporting ATPase ID;Phospholipid-transporting ATPase IB;Phospholipid-transporting ATPase IC;Phospholipid-transporting ATPase IK	672499	832962	558010	802307	851290	963382	934246	669772	266152	255233	293560	194441	334774	317352	437922	579411	541544	490347	582705	401434
0	1.02516	127893	A3KGB4	Tbc1d8b	TBC1 domain family member 8B	51633.5	51237.2	56541	50696.8	49049.5	39224.1	41921.9	32238.4	59978.1	55731.6	68455	66736.1	58161.1	59209.7	36238.8	43875.4	35113.3	40534.3	48053.3	34763.7
0	1.16977	52223.8	A3KMP2	Ttc38	Tetratricopeptide repeat protein 38	1.73076e+06	1.64743e+06	1.72837e+06	2.1563e+06	2.26778e+06	2.43574e+06	2.53564e+06	2.31721e+06	2.67624e+06	2.65605e+06	2261152	2377843	2.5391e+06	2.82697e+06	2.40493e+06	2.95592e+06	2247819	2.53511e+06	2.33639e+06	2.61824e+06
0	1.08939	80852.1	A6H611	Mipep	Mitochondrial intermediate peptidase	312114	229833	335582	321566	378679	319053	369901	246497	350653	300951	312881	329736	380818	396284	312781	381860	339219	362372	334848	312914
0	1.10143	95956.2	A6H690	Iqca1l	IQ and AAA domain-containing protein 1-like	697076	616416	578130	504715	386236	343858	416351	319225	1.88713e+06	1.60138e+06	1.9556e+06	2.3858e+06	785859	543044	613754	573896	420441	434663	344205	359230
0	1.08097	92404	A6H6A9	Rabgap1l	Rab GTPase-activating protein 1-like	73164.9	72266.7	58627.9	34637.1	37706.3	51234.6	54976.4	38323.7	51952.6	54089.7	70645.6	57989.5	39123.6	55390.2	57618.8	47696	40843.2	35727.6	46282.8	37727.5
0	1.04801	211458	A6H8H2	Dennd4c	DENN domain-containing protein 4C	10908.6	22434.9	16697.5	6884.9	7729.34	16794.3	13404.3	19125.1	21746.8	13635.2	26145.9	27158	17371.3	13963	19454.4	13930.7	18249.4	22994.6	21075.2	24941.3
0	1.14022	84187	A6X919	Dpy19l1	Probable C-mannosyltransferase DPY19L1	144393	123584	160974	139345	141356	171998	147900	141997	62164.2	75865.4	79136.6	76091.2	68304.4	69051.3	89105.3	82461.2	87022.9	123621	121871	105426
0	1.16918	104659	A6X935	Itih4	Inter alpha-trypsin inhibitor, heavy chain 4	5.53317e+06	5733436	3.94573e+06	5.42549e+06	2.20411e+06	2.10401e+06	1.69507e+06	2.57897e+06	2.26096e+06	2169788	1.95162e+06	2.52091e+06	1.48633e+06	1.53835e+06	1.87111e+06	1264994	1.23133e+06	2.02379e+06	1.38973e+06	1.76441e+06
0	1.10237	44567.2	A7MCT6	Etnk2	Ethanolamine kinase 2	493802	479248	618169	234212	210015	262636	236297	242178	253431	300010	233780	250155	266222	288038	250230	266733	201431	218312	196452	280878
0	1.15588	15676.2	B1AR13	Cisd3	CDGSH iron-sulfur domain-containing protein 3, mitochondrial	169476	221370	363439	283093	312055	282597	324570	299534	323972	307758	323511	287901	417831	461362	498883	456212	299809	313355	338385	422878
0	1.10949	294001	B1AY13	Usp24	Ubiquitin carboxyl-terminal hydrolase 24	72949.8	77474.5	76966.4	76719.3	86050.4	92974.2	84595	89709.4	73054.6	80643.3	95224.2	98789.6	75054	87534.4	83411.9	93587.5	71745.1	76798.3	80217.4	67604.8
0	1.13812	182773	B1AZI6	Thoc2	THO complex subunit 2	62433.2	70736.3	64190.5	51797.5	59423	65129.3	72303.4	54099.9	73425.5	68954.2	104271	113809	51026.9	51209.1	59268.3	60800.9	60314.4	55882.3	57177.5	59396.2
0	1.13998	243238	B2RQC6	Cad	CAD protein	119363	133931	115084	174834	221991	216410	203108	199871	283643	255458	322119	315649	214822	186434	204114	184343	169750	178028	175251	137515
0	1.13214	169223	B2RX12	Abcc3	ATP-binding cassette sub-family C member 3	311570	332846	408514	176594	162826	163794	195023	145283	297373	339781	385931	362129	196786	148780	183228	179100	223247	229235	243290	269958
0	1.07824	128396	B2RXC1	Trappc11	Trafficking protein particle complex subunit 11	30848.5	31508.6	24033.9	25582.9	27398.2	21736.5	28629.6	31561.5	36702.8	40077.8	41930.6	39938	31238.1	22883.5	21133.4	28813.4	26570.3	24661.5	27025.2	28113.2
0	1.1216	206230	B2RXS4	Plxnb2	Plexin-B2	319104	307209	305100	305165	338397	318313	327068	288178	342350	368175	361033	369422	314720	266209	313567	296218	295796	284723	304487	306670
0	1.09345	99551.9	B2RY56	Rbm25	RNA-binding protein 25	318072	323460	318411	249840	222327	263320	265222	233850	336678	292185	389259	427165	257494	223897	284992	243788	235582	238986	236146	258937
0	1.1331	20638.4	B5X0G2	Mup17	Major urinary protein 17	184664	192708	84315.3	52437.8	181727	360531	75186.5	271575	22696.6	21067	38101.1	38011.7	38642.5	25485	47298.2	37597.8	579008	820988	457205	40154.1
0	1.11561	56677.2	B7ZMP1	Xpnpep3	Xaa-Pro aminopeptidase 3	125797	151262	124428	90379.2	106434	126218	97241.6	88579	125498	120808	126547	146972	115909	97374.3	78041.6	95579.7	147252	137686	132748	143214
0	1.11062	101269	B9EJ86	Osbpl8	Oxysterol-binding protein-related protein 8	60302.8	49537.8	54110.7	56411.3	62709.4	49519.7	59064.8	45934.3	75039.8	69874.3	85473.6	81102.7	73188.4	67272.2	60118.9	56766.7	63475.3	69305.8	65363.6	65107.2
0	1.14275	14135.49;14135.49;14135.49;14135.49;14135.49;14135.49;14135.49;14135.49;14135.49;14121.46;14161.53;13950.26;14149.52;14045.45	C0HKE1;C0HKE2;C0HKE3;C0HKE4;C0HKE5;C0HKE6;C0HKE7;C0HKE8;C0HKE9;Q8BFU2;Q8CGP5;Q8CGP6;Q8CGP7;Q8R1M2	H2ac4;H2ac6;H2ac7;H2ac8;H2ac11;H2ac13;Hist1h2an;Hist1h2ao;Hist1h2ap;H2ac25;Hist1h2af;H2ac12;H2ac15;H2aj	Histone H2A type 1-B;Histone H2A type 1-C;Histone H2A type 1-D;Histone H2A type 1-E;Histone H2A type 1-G;Histone H2A type 1-I;Histone H2A type 1-N;Histone H2A type 1-O;Histone H2A type 1-P;Histone H2A type 3;Histone H2A type 1-F;Histone H2A type 1-H;Histone H2A type 1-K;Histone H2A.J	129033	213586	785958	469826	148681	89877.1	369577	550704	200102	140127	840172	2.02323e+06	82727.5	115010	15642.1	100702	17932.9	40671.8	161069	211652
0	1.12888	29608.78;29608.78	C0HKG5;C0HKG6	Rnaset2a;Rnaset2b	Ribonuclease T2-A;Ribonuclease T2-B	235956	238149	248627	235463	264259	248609	247481	235330	175503	205545	180863	211231	196163	183533	203135	197842	253202	250242	249343	247065
0	1.13927	105104	D3YXK2	Safb	Scaffold attachment factor B1	271069	243251	283277	267216	93882.8	127775	268033	245615	289672	202924	290022	353202	196720	109910	215822	235141	231057	237204	270933	338938
0	1.12441	58316.5	D3Z6P0	Pdia2	Protein disulfide-isomerase A2	28755.1	46571.2	43744.8	27114.8	42891.8	32555.2	27544.9	32456.3	26334.5	27021.7	44686.7	23400.5	35510.7	28744.2	27670.7	24201.1	428857	28772.6	27380.4	24916.8
0	1.11237	52554	D3Z6Q9	Bin2	Bridging integrator 2	38619	54316.9	43163.7	24979.4	28252.9	19449.4	24057.3	25755.3	95614.8	103055	91658.5	103655	34833.9	24787	23662.3	21250.5	23322.3	23303.9	13786.3	24418.9
0	1.17245	87429.3	E9PV24	Fga	Fibrinogen alpha chain	7293638	13534145	6.21184e+06	5.511e+06	3.25479e+06	3.01135e+06	2.4354e+06	3733795	3058463	2.84573e+06	3.04648e+06	3806417	2239613	1.8669e+06	2.46548e+06	2.30721e+06	1.95829e+06	2.47758e+06	2315548	2.60527e+06
0	1.16158	293021	E9PVA8	Gcn1	eIF-2-alpha kinase activator GCN1	331369	296678	319143	261340	334678	311670	301879	291816	259345	223369	282673	272208	294821	270012	287291	274540	273331	280136	261894	231918
0	1.11036	24218.7	E9PW74	Gimd1	GTPase IMAP family member GIMD1	66022.9	75071	44033.8	38834.7	45932.4	48337.6	21024.1	14990.1	72318.2	38347.7	98217.8	83344.5	77706.3	83775.7	100144	74257.9	37963.5	83260	56016.1	57742
0	1.13772	196020	E9PX95	Abca17	ATP-binding cassette sub-family A member 17	609635	579669	549191	649053	549939	522822	537224	506738	803565	855093	885320	851591	585002	616286	592455	590443	546947	504128	490379	531962
0	1.14569	216133	E9PYK3	Parp4	Protein mono-ADP-ribosyltransferase PARP4	38044	43861.5	19563.6	33450.5	28933.1	29083.6	22375.6	34340.4	91411.7	81994.7	101593	103286	54139.2	46944.5	27664.6	30785.2	48429.9	45054.1	37172.9	34160.5
0	1.03446	250557	E9PZJ8	Ascc3	Activating signal cointegrator 1 complex subunit 3	22756.2	24130.1	21124.4	20826.3	16073	16988.6	17366.8	20955.4	24043.9	24893.5	25881.1	24418.7	19084.3	17307.1	24693.5	20320	20658.8	17789	18755.3	17721
0	1.15689	33589.8	E9Q137	Tex264	Testis-expressed protein 264 homolog	300220	165964	265778	326621	336556	375730	320880	320269	247346	271466	203375	212788	446445	403381	257101	335281	296104	341128	290616	267924
0	1.1288	76536.1	E9Q3C1	C2cd2	C2 domain-containing protein 2	731293	677073	735303	714805	711779	878932	855794	766246	556270	540433	447024	524689	660038	570038	543309	774042	696954	729885	639987	716199
0	1.09114	237042	E9Q3L2	Pi4ka	Phosphatidylinositol 4-kinase alpha	53575	53964.6	55723.2	49214.3	39590.8	47753.1	34805.4	56013.7	55256	51020.9	51054	56740.7	43910.1	45368.3	57035.1	45999.1	58002.8	59441.1	61144.8	59236
0	1.1686	509432	E9Q414	Apob	Apolipoprotein B-100	2568556	2.52575e+06	2.53438e+06	2.36083e+06	2.08155e+06	1.84826e+06	1.77653e+06	1932038	2.31905e+06	2.07772e+06	2.31311e+06	2.1009e+06	1.94955e+06	1.81643e+06	1.9472e+06	2016413	1.63069e+06	1.99907e+06	1.84542e+06	1.85993e+06
0	1.15268	275750	E9Q4Z2	Acacb	Acetyl-CoA carboxylase 2	374245	381782	382208	364491	410862	480459	417241	472572	418975	195840	461306	237629	997489	1.30213e+06	886469	955679	468067	591393	422611	304851
0	1.12584	584258	E9Q555	Rnf213	E3 ubiquitin-protein ligase RNF213	178260	118549	192786	169330	196956	183728	177748	206855	333036	344045	417493	326221	190957	192020	189722	180162	173875	168976	155952	186071
0	1.11691	332912	E9Q557	Dsp	Desmoplakin	94949.8	41698.8	68148.2	60475.3	35442.4	25128.7	83724.3	81019.6	49753	43443.3	158436	212810	30694.5	28325.7	70625.8	90200.3	41516.2	34543	118875	116430
0	1.11647	73697.8	E9Q5C9	Nolc1	Nucleolar and coiled-body phosphoprotein 1	208342	236311	269972	223023	132075	157335	184375	302042	240193	183494	266134	299640	175169	142628	136498	169683	247365	197530	231026	305386
0	1.15601	56422	E9Q5K4	Cyp2c23	Cytochrome P450 2C44	369867	366356	413334	598827	1.11141e+06	939103	1.1387e+06	887895	475420	729044	373616	519354	1354291	743398	1.23458e+06	984420	1.46752e+06	1.35651e+06	1.62729e+06	1.63693e+06
0	1.11208	118198	E9Q735	Ube4a	Ubiquitin conjugation factor E4 A	93961.7	103338	137370	165384	159686	164509	198812	188309	231122	175775	236391	288027	244131	196659	167395	149942	268839	282374	191033	224351
0	1.12748	235630	E9Q7G0	Numa1	Nuclear mitotic apparatus protein 1	189766	184533	165919	145362	121039	143590	151294	148299	223482	214292	215624	242400	163641	111150	139364	140332	161686	154387	156639	172352
0	1.08986	66076.5	E9Q912	Rap1gds1	Rap1 GTPase-GDP dissociation stimulator 1	74695.9	66545.5	66303.2	64577.8	72370.3	59895.5	65958.4	40173.3	98892.6	103827	112006	85400.1	79612.8	78309.8	80175.1	94957.4	60466.8	61233.6	64735.9	68208.2
0	1.1239	331563	E9QAM5	Helz2	Helicase with zinc finger domain 2	855677	837333	817720	767455	678566	700274	655851	740136	771130	632257	669289	769781	593614	506940	665606	634264	634270	717783	635782	656506
0	1.12181	254202	E9QAT4	Sec16a	Protein transport protein Sec16A	314424	311055	345702	352032	343668	308216	302291	301321	266888	286640	359558	326048	295185	274564	305984	336663	301670	322810	318046	286596
0	1.11737	273990	F6ZDS4	Tpr	Nucleoprotein TPR	167227	160824	133132	93200.1	117066	102599	91575	106953	180661	166304	170658	219880	117021	107117	94223	95234.4	137882	130975	126243	162781
0	1.10293	118875	F8VPU2	Farp1	FERM, ARHGEF and pleckstrin domain-containing protein 1	460917	376066	547453	462654	348795	318682	457953	386000	583428	695556	914277	731292	485914	392140	582992	494437	395742	351107	473115	505280
0	1.16682	146902	G3X982	Aox3	Aldehyde oxidase 3	1.40792e+06	1507908	1.32752e+06	1.76767e+06	2.92055e+06	2.788e+06	2725759	2.3625e+06	1.02143e+06	1.07623e+06	964577	1.07583e+06	1.98449e+06	1146887	1.41935e+06	1.6506e+06	3.25553e+06	3.00861e+06	3.17628e+06	2.92625e+06
0	1.12806	208500	G3X9K3	Arfgef1	Brefeldin A-inhibited guanine nucleotide-exchange protein 1	116788	110868	110994	113461	115774	105488	98129.4	95754.5	132859	142684	149857	139467	114874	112044	81038.8	85327.2	110336	117183	98233.6	118989
0	1.12026	134747	G5E829	Atp2b1	Plasma membrane calcium-transporting ATPase 1	165278	142630	138039	94197	135609	136229	95531.4	114784	242061	244537	239393	266406	157627	131275	116768	129918	157081	141416	154636	179507
0	1.14052	224128	G5E870	Trip12	E3 ubiquitin-protein ligase TRIP12	411360	666293	900375	671148	533882	449230	689772	566127	439160	548394	717858	788865	319606	750242	757630	550849	544258	422449	599447	551245
0	1.08018	57686.1	G5E897	Poglut3	Protein O-glucosyltransferase 3	29120.3	8396.08	23004.1	16042.1	24525.2	11728.1	6930.78	21019.6	69418.2	72158.3	81620.4	78568.4	49187.3	38246.9	34958.5	33225.7	49400.4	49091.4	38503.2	42126.2
0	1.12818	214062	G5E8K5	Ank3	Ankyrin-3	126001	162580	128326	125901	134648	147930	143646	138835	351056	357466	388539	409000	218762	198049	207006	224749	157218	139052	166093	259143
0	1.07505	41518	G5E8V9	Arfip1	Arfaptin-1	196656	240765	181670	212309	187739	186675	90415.2	150452	324930	308421	381880	327491	218620	191513	189799	169436	200967	198633	179661	200857
0	1.04732	102535	O08528	Hk2	Hexokinase-2	14895.9	8244.52	11528.9	9923.91	9658.31	20926.9	10321.2	12672	50605.8	72723.8	63954.9	60388.6	18953	12658.8	17036.5	15890.6	13808.8	12230	24748.8	17192.4
0	1.15889	79872.2	O08529	Capn2	Calpain-2 catalytic subunit	348691	321411	309971	347747	351232	408890	344053	374817	796645	787837	908560	864975	559822	502290	472405	480576	392639	378005	371960	341637
0	1.12156	64470.2	O08539	Bin1	Myc box-dependent-interacting protein 1	83610.6	85177.9	77579.8	71621.8	69834.1	76142.2	71028.7	60648.6	127252	122986	113601	134421	87366.8	61145.6	63899.2	67832.1	82762.4	74954.1	59281.9	82567.6
0	1.15205	24740.6	O08547	Sec22b	Vesicle-trafficking protein SEC22b	962532	1.00092e+06	755631	888275	893418	822591	737836	798369	926894	869254	1.02261e+06	1067722	1.08286e+06	909667	1.01557e+06	869758	962014	1.00942e+06	968685	902460
0	1.16074	62277.6	O08553	Dpysl2	Dihydropyrimidinase-related protein 2	599985	620920	582435	452708	538568	534187	485727	488343	816508	872630	943096	910768	623900	503075	501805	527336	599572	512833	541527	656698
0	1.18103	40035.9	O08573	Lgals9	Galectin-9	1.50847e+06	1.02924e+06	1.50275e+06	1.92727e+06	1.7795e+06	2.07688e+06	1.86711e+06	1.54006e+06	1.14635e+06	1.18728e+06	1.07028e+06	1.19359e+06	1674359	2022101	1.87264e+06	1931559	1.46017e+06	1.68787e+06	1.91781e+06	1849677
0	1.10176	29435.5	O08579	Emd	Emerin	62001.1	58468.2	83398.8	90126.1	69174.3	73262.7	79250.7	91455.9	98352.1	87779.4	111186	111004	77299.9	85352.4	59677.1	70199.2	81355.9	81640	84036.8	96862.5
0	1.04474	45464.46;48327.98	O08580;Q61539	Esrra;Esrrb	Steroid hormone receptor ERR1;Steroid hormone receptor ERR2	5046.02	3565.88	6558.97	2889.91	3893.06	2454.84	5516.42	2748.92	4351.06	3433	5352.53	5408.11	3595.13	4034.19	7197.32	6640.43	4639.64	4640.84	8105.44	7809.78
0	1.04654	72300.7	O08582	Gtpbp1	GTP-binding protein 1	60775.2	53760.1	57619.7	51864.6	31586.2	46591.1	42823	20827	70325	62451.6	87828.1	86689.8	65281.1	55416.2	71309.4	64942.1	41565.4	36418.2	60235.5	33959.4
0	1.14809	26940	O08583	Alyref	THO complex subunit 4	83536.3	101716	78585.3	75318.9	63149.9	76171.9	77241.7	102860	67163.6	64110.5	83934	93628	64970.6	62492.8	47348	55248.9	68275	59535.8	55232.9	81113.6
0	1.16517	25604.1	O08585	Clta	Clathrin light chain A	1.36843e+06	1.33738e+06	1131467	1.01739e+06	1123717	1.05235e+06	944500	892773	1.95559e+06	1.9446e+06	2.32501e+06	2.16641e+06	1.25878e+06	1.19365e+06	1.32308e+06	1.15382e+06	1.20468e+06	1.15311e+06	1.26951e+06	1339476
0	1.03504	47152.3	O08586	Pten	Phosphatidylinositol 3,4,5-trisphosphate 3-phosphatase and dual-specificity protein phosphatase PTEN	92393.2	76615.2	89880.1	77559.2	83128.5	73403.5	55215.9	62329.3	128888	143275	152256	118657	99984.9	110434	84135.3	100257	92811.6	113352	124509	89155
0	1.15233	32190.6	O08600	Endog	Endonuclease G, mitochondrial	768567	925739	786807	1.07864e+06	1.30585e+06	999378	1.00736e+06	1.29094e+06	1.01984e+06	1.19285e+06	868992	1.03622e+06	1.63364e+06	1.38721e+06	1.17226e+06	1.38186e+06	1.1861e+06	1.23101e+06	1.06142e+06	1.53384e+06
0	1.17672	99098.9	O08601	Mttp	Microsomal triglyceride transfer protein large subunit	8.22313e+06	7.24227e+06	6.81314e+06	6642191	6.73217e+06	6673992	5.9105e+06	6.25721e+06	7.32794e+06	6080164	8.23731e+06	6835680	8480786	8837735	8.30635e+06	7.85704e+06	7019756	7.37801e+06	7180674	6198509
0	1.10036	28615.82;28624.9;28507.51;28284.31;27883.99	O08602;O08603;O08604;Q9CZQ6;Q9JI58	Raet1a;Raet1b;Raet1c;Raet1e;Raet1d	Retinoic acid early-inducible protein 1-alpha;Retinoic acid early-inducible protein 1-beta;Retinoic acid early-inducible protein 1-gamma;Retinoic acid early-inducible protein 1-epsilon;Retinoic acid early-inducible protein 1-delta	17222.3	9582.61	10731.7	10744.4	9282.01	63383.2	50572.9	58981.2	20150	7224.67	21592.3	26821.3	34957.4	109458	68287.6	36832.2	130219	137783	63681	73794.8
0	1.063	33339	O08609	Mlx	Max-like protein X	9292.78	9167.92	10220.8	14071.2	15892.4	15390.5	16410.1	11901.3	14185.7	13448.5	16075.2	16128.7	21817.6	24020	25493.8	23280.5	19734.2	23704	20943.3	16386.1
0	1.12	227028	O08638	Myh11	Myosin-11	1.12485e+06	243725	280530	239329	241264	206264	218313	208075	228132	369664	177795	240146	1.23204e+06	406850	158445	279837	689167	150549	959937	451028
0	1.14285	52921.8	O08663	Metap2	Methionine aminopeptidase 2	249948	249827	238470	225499	234865	187201	242581	182038	262753	259311	324510	292858	217382	206650	213494	209934	184912	174721	187452	173348
0	1.16129	73102.1	O08677	Kng1	Kininogen-1	1.90721e+06	2.50607e+06	1.69722e+06	1.81627e+06	1.33528e+06	1.1521e+06	1.01389e+06	1262485	1.65883e+06	1.97373e+06	1.38698e+06	1.68268e+06	1.09588e+06	1.08679e+06	1.05175e+06	1.09312e+06	986856	1.02245e+06	987651	1.25661e+06
0	1.16689	19331.7	O08692	Ngp	Neutrophilic granule protein	226827	1.09983e+06	202445	574525	44871.1	104736	55785.4	1.00202e+06	2.13653e+06	1.8989e+06	2.13984e+06	3562157	455844	174991	56988.9	132908	130112	139071	72196.5	108882
0	1.15294	39413.2	O08705	Slc10a1	Hepatic sodium/bile acid cotransporter	2.37293e+06	1568551	2.5341e+06	2.7313e+06	2117266	3.15586e+06	3.09712e+06	2207369	394811	634264	306510	204737	806674	1.07427e+06	1.50046e+06	1.65723e+06	1.21342e+06	1.2394e+06	1.5788e+06	1.25243e+06
0	1.19324	24870.6	O08709	Prdx6	Peroxiredoxin-6	23310074	19826000	21173518	28682852	27982364	27545108	23117404	25341762	35817120	32338992	29929774	35556020	33156014	31582638	27746154	28626044	33036278	36066440	29181850	32805932
0	1.12768	92194.7	O08715	Akap1	A-kinase anchor protein 1, mitochondrial	173163	185207	167026	116854	119841	111290	106694	103189	106551	100815	95911.5	93888.4	106084	116781	47187.9	75521.2	122668	130976	85380.1	94300.5
0	1.12283	31595	O08738	Casp6	Caspase-6	60370.5	55703.8	65599	63978.8	67021.5	64737	58518.8	39230.3	182030	166516	140480	186515	98633.7	68642.8	60909.7	57431.9	102709	89629.1	78801	106105
0	1.18762	54272.3	O08749	Dld	Dihydrolipoyl dehydrogenase, mitochondrial	5.34087e+06	5548184	5333519	4950909	5.02773e+06	4639288	4441100	4.70317e+06	5.87904e+06	5.76136e+06	4.99029e+06	5493736	5733847	5747439	5.91133e+06	5100786	6.05403e+06	5930292	6.41824e+06	7.0881e+06
0	1.19652	27418.6	O08756	Hsd17b10	3-hydroxyacyl-CoA dehydrogenase type-2	11484576	12540521	11894791	9063530	8084692	8517054	8611502	9522665	8041325	8600574	6.6212e+06	9191272	7689449	10302685	7.9069e+06	7398533	9732039	9966353	10351710	9312181
0	1.10966	99819.5	O08759	Ube3a	Ubiquitin-protein ligase E3A	159419	141038	137799	141058	152319	152842	129592	126636	157454	163805	166449	155493	144825	156494	126894	161312	137357	151201	145759	156206
0	1.07614	135001	O08784	Tcof1	Treacle protein	87023.2	101714	79460.1	68280.4	62295.1	59748.3	67694.1	24133	92824	109749	89302.4	76124.8	76276.4	77806.3	48564.8	74830	77848.1	74696.4	70524.2	84527.8
0	1.11334	141676	O08788	Dctn1	Dynactin subunit 1	128424	125531	136718	128552	118893	125645	117444	116245	153072	153436	150106	135574	129438	144249	120248	137477	125622	119801	112532	112262
0	1.17195	58792.7	O08795	Prkcsh	Glucosidase 2 subunit beta	4.05204e+06	3856680	3.42836e+06	3733536	4.01511e+06	3.96601e+06	3.83914e+06	3.56797e+06	4.48872e+06	3.91223e+06	4.46173e+06	4607000	4.01653e+06	3.47417e+06	4.04886e+06	3.57048e+06	4.08306e+06	4.06231e+06	3.94383e+06	4.36865e+06
0	1.17919	31052.5	O08807	Prdx4	Peroxiredoxin-4	1.41824e+06	1.49527e+06	1.33282e+06	1.36819e+06	1.79494e+06	1.99377e+06	2.07669e+06	1.60497e+06	1.8208e+06	1.60367e+06	1.94213e+06	1.6351e+06	1638131	1.35079e+06	1.70864e+06	1.71741e+06	1.40511e+06	1.37811e+06	1.41804e+06	1.67767e+06
0	1.12904	139343	O08808	Diaph1	Protein diaphanous homolog 1	190279	168550	186696	204043	196622	219574	222037	186701	331253	365448	434629	366662	277211	268630	260263	241806	197316	234270	208561	247804
0	1.17889	109361	O08810	Eftud2	116 kDa U5 small nuclear ribonucleoprotein component	12287329	12692025	11441337	9240880	8501955	8612808	9329135	9331033	11903114	10325232	12725742	14788875	8707708	7219774	8559404	8704802	9593360	9112923	8794546	11102431
0	1.15909	63221.4	O08914	Faah	Fatty-acid amide hydrolase 1	816836	692240	828640	965846	1.02445e+06	1.04335e+06	1.03164e+06	920282	1.07634e+06	908184	1.01843e+06	1.06678e+06	1.00923e+06	989084	991752	1.01387e+06	1075827	1040680	1.07489e+06	1.0869e+06
0	1.10906	37604.9	O08915	Aip	AH receptor-interacting protein	223303	189312	191228	158724	149301	167424	142225	129234	259055	239232	240611	305279	163642	144310	118999	122091	166108	175430	152091	197245
0	1.11105	47513.4	O08917	Flot1	Flotillin-1	253046	224366	222459	262722	173039	200094	215275	243041	260931	274070	287695	422546	255758	233327	271951	208580	252911	244109	245456	272325
0	1.16712	61521.1	O08966	Slc22a1	Solute carrier family 22 member 1	647741	575513	630729	836973	840758	902688	743579	692050	358647	238822	264381	315535	568459	601022	650360	591086	746889	834318	844177	373796
0	1.19163	7338.42	O08997	Atox1	Copper transport protein ATOX1	2.11803e+06	1.96484e+06	1.79285e+06	1.99983e+06	1.834e+06	1709053	1.68697e+06	2.16396e+06	4.12402e+06	4.84531e+06	4.19857e+06	4670224	2729113	2.70083e+06	2295654	2.9804e+06	1.68485e+06	2.05202e+06	1.35337e+06	1.5755e+06
0	1.14074	70755.5	O09012	Pex5	Peroxisomal targeting signal 1 receptor	421993	419804	450286	563950	446612	580928	646353	685820	359336	312878	445185	404856	429492	445143	443649	448578	442188	527494	520793	481328
0	1.03248	45544.4	O09043	Napsa	Napsin-A	54346.2	57891.6	60934.3	78895.1	59313.4	47942	63826.2	86732.9	63774.8	79217.2	63501.1	84275.2	27488.4	32064.9	30804.8	24332.8	66519.5	68594.4	56005.5	60595.5
0	1.12604	23260.9	O09044	Snap23	Synaptosomal-associated protein 23	170630	175146	180344	196254	215206	200476	225872	220085	276943	285185	316458	314156	236892	210134	221882	196290	217025	211662	224899	230438
0	0.988126	19307	O09049	Reg3g	Regenerating islet-derived protein 3-gamma	20518.4	133420	10522.8	7010.5	9101.37	19720.1	9726.03	16159.3	9330.41	8861.56	17827.6	17435.7	58533.5	6265.08	19809.3	13681.1	19595.2	6695.08	12349.7	24845
0	1.17492	26372.2	O09061	Psmb1	Proteasome subunit beta type-1	2.79429e+06	2790046	2689810	2802602	2.6862e+06	2.8052e+06	2.65822e+06	2.76173e+06	2.78753e+06	2.88388e+06	2.78861e+06	2.80646e+06	2721096	2.64535e+06	2647009	2534754	2.56021e+06	2.59435e+06	2.4673e+06	2.38928e+06
0	1.11982	55074.9	O09106	Hdac1	Histone deacetylase 1	381822	461956	386813	324455	339524	303769	309452	324484	477971	435176	516474	511210	267607	247167	255220	279273	273352	244203	260562	260907
0	1.12302	39296.4	O09110	Map2k3	Dual specificity mitogen-activated protein kinase kinase 3	78226.6	71397.7	78690.9	86703.3	109472	101999	102841	110191	84012.6	87874.1	87686.7	82213.9	92925.1	92654.2	77459	92284.3	77839.8	80831.9	74226.8	79372.5
0	1.17976	17443.8	O09111	Ndufb11	NADH dehydrogenase [ubiquinone] 1 beta subcomplex subunit 11, mitochondrial	7.60647e+06	8627764	7.70459e+06	7022021	7873575	8.1642e+06	8725587	7.41252e+06	5.70817e+06	5307240	5.11253e+06	5.18756e+06	5645341	5.64061e+06	5679690	5.65139e+06	5791905	6.06683e+06	5.42291e+06	5606432
0	1.15783	28899.4	O09117	Sypl1	Synaptophysin-like protein 1	225617	202569	230257	202418	226341	235664	230584	246310	273031	300100	310149	314306	237434	229064	202916	198236	197183	208757	193636	201156
0	1.17555	27497.6	O09131	Gsto1	Glutathione S-transferase omega-1	10812531	9223379	10469785	11779643	11375653	9652679	11180747	9903421	10176614	11406051	8836704	9850701	10054513	8867737	8614011	9235422	11396316	9200785	10073956	11375892
0	1.16858	58122.2	O09158	Cyp3a25	Cytochrome P450 3A25	448982	383280	600139	429112	685641	575553	680408	804333	434349	524513	244527	356390	692909	805839	839224	673988	477202	563850	551517	644827
0	1.15153	114648	O09159	Man2b1	Lysosomal alpha-mannosidase	491274	506318	447349	445440	410975	385900	425485	385560	673390	771436	666184	665932	379913	314747	364180	346989	465148	488978	448500	392644
0	1.12981	27391.9	O09164	Sod3	Extracellular superoxide dismutase [Cu-Zn]	169184	268269	115035	149385	149550	145316	86262.9	148272	163300	214173	192905	167206	126595	99581.4	106537	149091	62367.9	85564.4	66402.5	101797
0	1.17257	18561.8	O09167	Rpl21	60S ribosomal protein L21	1.39733e+06	1.64255e+06	1.75883e+06	1.82921e+06	1.89964e+06	1.95743e+06	1.92095e+06	2.08023e+06	1.94243e+06	1.74958e+06	2.22003e+06	2158145	1.83262e+06	1.6863e+06	1.53149e+06	1.62358e+06	1834783	1.75015e+06	1.67336e+06	1.74317e+06
0	1.14299	30534.8	O09172	Gclm	Glutamate--cysteine ligase regulatory subunit	867992	767279	785241	982466	873911	974456	832918	836255	898078	1.03701e+06	919979	1.01733e+06	860638	725344	784060	737784	888122	944774	836524	905925
0	1.18709	49959.9	O09173	Hgd	Homogentisate 1,2-dioxygenase	8188474	7896119	9052358	9433295	9139701	10039691	9537027	9138571	8398173	8801211	7860114	7221704	9821386	11275092	9125273	10754575	8956661	9577551	9112328	11777524
0	1.16925	41704	O09174	Amacr	Alpha-methylacyl-CoA racemase	2838804	2.99342e+06	2605702	1.79118e+06	2.06308e+06	1.97049e+06	1.96769e+06	2201057	1.82771e+06	1.91696e+06	2015554	2.11981e+06	2.13812e+06	2.29559e+06	2.19585e+06	2.03585e+06	2.12216e+06	2.0284e+06	2.04621e+06	2367066
0	1.15515	122434	O35071	Kif1c	Kinesin-like protein KIF1C	210332	181325	174376	184232	222209	188424	206201	174702	225973	217879	285241	226956	195369	235862	202373	230945	230388	241986	231358	218973
0	1.08158	57046.7	O35074	Ptgis	Prostacyclin synthase	127952	89552.6	91841.1	94718.8	94715.7	42567.4	57381.9	94553.6	207424	232422	208935	191131	171144	89726.1	176018	112819	129380	41779.8	160803	75268.8
0	1.11774	32970.3	O35075	Vps26c	Vacuolar protein sorting-associated protein 26C	51850.8	48370	59924	58934.8	62257.1	64051.1	68260.3	80226.4	58717.7	64099.6	53503.3	57660.1	53399.3	43183.6	43609.6	45629.6	49309.9	49020.9	42306.1	46948.8
0	1.12593	54044	O35114	Scarb2	Lysosome membrane protein 2	537200	538358	479385	450178	355838	399932	443295	467007	562183	497656	473563	583889	393585	308142	388506	331896	586773	571460	518300	535489
0	1.08348	13194.1	O35127	Grcc10	Protein C10	179942	178740	175798	99293.6	97424.1	99941.5	110130	164751	124354	134443	141543	157732	83234.1	68912.6	60369.7	70059.9	83418.9	97766	69842.2	90939.7
0	1.17724	33296.4	O35129	Phb2	Prohibitin-2	7.54434e+06	7957682	7541058	6.03516e+06	6312166	6.2705e+06	6791963	5801838	6.74267e+06	6627827	5839955	6.68143e+06	6688200	6799680	6.6927e+06	6.38298e+06	7422400	6971685	7.33586e+06	7.11666e+06
0	1.15126	12158.7	O35143	Atp5if1	ATPase inhibitor, mitochondrial	709223	715614	626836	734191	538652	464275	606091	546116	878644	854222	903999	965853	795785	738858	760774	810080	425807	384396	358204	459019
0	1.08059	24725.3	O35166	Gosr2	Golgi SNAP receptor complex member 2	250824	74732.9	54045.9	204772	266210	211856	208749	47765.8	126828	23683.2	30234.7	31131.7	119265	21612.5	61944.8	86704.8	85272.5	74100.8	12568.4	23504.5
0	1.18592	13077.2	O35215	Ddt	D-dopachrome decarboxylase	41846272	38786304	38472016	45538572	46045712	43163120	40361832	41450880	44007280	46443988	38810304	42210796	43612504	47066620	40181568	41364548	53347128	54586668	45054412	52524744
0	1.06645	88382.6	O35218	Cpsf2	Cleavage and polyadenylation specificity factor subunit 2	21239	36899.3	30502.3	27564.9	17998.9	19612.4	22236	18618.7	22704.6	18994.9	12351.5	33102.6	14501.7	16709.1	14130	14555	20918.8	17837.3	18139.8	12987.7
0	1.16803	40703.7	O35226	Psmd4	26S proteasome non-ATPase regulatory subunit 4	810580	844141	759569	840362	799526	848124	832204	937156	740214	722011	689088	705025	734205	816753	729075	729382	676803	705580	612612	631015
0	1.07856	79960.2	O35250	Exoc7	Exocyst complex component 7	32579.3	29969.6	39351.1	33079.2	33004.6	27202.7	29514.7	21861.4	32975.1	38329	57733.5	51241.2	32770.2	28807.1	29806.2	30999.4	31647.3	32203.4	31669.8	35421.9
0	1.15006	91006.9	O35286	Dhx15	ATP-dependent RNA helicase DHX15	836278	907347	812379	638366	585826	619923	688384	571944	994344	924539	1085613	1.10258e+06	672780	573340	588645	628831	655092	630140	617466	734925
0	1.14253	33901.4	O35295	Purb	Transcriptional activator protein Pur-beta	538372	576640	523250	545437	582962	623821	634732	606581	528401	508440	523096	535781	433173	380579	412556	442988	438490	433041	410069	433898
0	1.11831	35235.8	O35309	Nmi	N-myc-interactor	136531	124074	126828	135834	145936	148976	122133	129273	165548	191362	173817	159205	116219	139494	141830	158066	106806	116324	122295	105157
0	1.1537	30891.4	O35326	Srsf5	Serine/arginine-rich splicing factor 5	777741	826499	743471	451308	442583	420348	443102	498690	739837	662774	768852	790311	413774	336689	363212	337239	366062	410627	411536	473650
0	1.11892	57922.8	O35343	Kpna4	Importin subunit alpha-3	382715	292608	322766	447072	389829	435618	404114	455053	459284	507815	557636	481696	396872	416605	411866	452005	440260	425073	404647	386921
0	1.12898	57772.8	O35344	Kpna3	Importin subunit alpha-4	57314.2	64669.1	57195.1	77975.4	78531.1	103224	103568	142337	61463.9	51324.3	76260.2	59932.1	68668.1	50783.4	74542.9	65664.3	65387.4	67592.3	58082.7	59841.3
0	1.17077	59964.4	O35345	Kpna6	Importin subunit alpha-7	264771	262755	271941	327842	337784	369666	330742	324477	338297	369435	378850	391463	389190	402557	342200	363333	342485	339171	379769	362924
0	1.12779	82106.3	O35350	Capn1	Calpain-1 catalytic subunit	321975	330398	270422	290530	301608	275269	290098	207628	517402	611073	608256	570813	399588	342368	309959	354534	331909	351887	296169	299343
0	1.17255	28537.5	O35381	Anp32a	Acidic leucine-rich nuclear phosphoprotein 32 family member A	3.02527e+06	2837399	3.04368e+06	2.61072e+06	2899975	2.83875e+06	2734672	2.63024e+06	2710717	2.83252e+06	2.43541e+06	3.02566e+06	2419917	2.26847e+06	2.08757e+06	2.366e+06	2.3423e+06	2334539	2.17013e+06	2499270
0	1.14121	110545	O35382	Exoc4	Exocyst complex component 4	82299.8	79944.3	84939.4	83920.1	74198.1	83738.4	101988	92248.1	119037	128440	123961	125666	107493	88461.7	87909.3	81479.4	91910.3	82589.5	74769.9	94922.4
0	1.15502	38607.3	O35386	Phyh	Phytanoyl-CoA dioxygenase, peroxisomal	3081992	3.08495e+06	3.22063e+06	1.00366e+06	1.44013e+06	1565007	1.44657e+06	1.33072e+06	692938	719079	583666	757380	988462	1.07166e+06	1.15551e+06	1.32863e+06	1.38444e+06	1.32242e+06	1.42707e+06	1.7658e+06
0	1.11614	31654.4	O35387	Hax1	HCLS1-associated protein X-1	97335	95524.6	97251.5	49097.4	64000.1	70366	73059.1	89812.8	76230.5	60260.9	79065.4	85130.5	63970.3	55876.3	64352.8	58065.4	75887.4	75551.9	74670.2	63995.6
0	1.15667	54389	O35405	Pld3	5'-3' exonuclease PLD3	435916	411542	395198	413278	335477	440711	178838	424016	1.03828e+06	1.27903e+06	1.29772e+06	1.31417e+06	269217	176480	335838	181583	455326	453978	422839	429546
0	1.18443	45912.2	O35423	Agxt	Alanine--glyoxylate aminotransferase	8481281	10000741	10233643	7.28643e+06	7468829	6.79873e+06	8583560	7699993	4556558	7022028	5402885	6375756	5.43624e+06	5843749	6.04003e+06	6.91575e+06	6755694	6.60993e+06	7.40149e+06	17023770
0	1.10561	42700	O35435	Dhodh	Dihydroorotate dehydrogenase (quinone), mitochondrial	272446	268895	212664	197360	245852	257543	194322	222885	284093	263250	278280	287957	215043	231055	116488	216382	169676	192140	166575	193407
0	1.06337	19837.4	O35445	Rnf5	E3 ubiquitin-protein ligase RNF5	31822.3	29495.4	56873.1	81912.8	50659.1	68133	118883	92509.5	26791	43754.4	23615.5	17310.9	53224.9	41604.4	76643.2	70956	24409	38939.1	31197.3	30262.1
0	1.10414	34366.3	O35448	Ppt2	Lysosomal thioesterase PPT2	230801	241076	177770	189204	207815	191462	149496	137984	159099	172435	196495	172012	159369	140774	140192	135482	203742	203601	169327	149033
0	1.13496	46821.3	O35453	Hpn	Serine protease hepsin	182079	111326	181006	231580	248920	210793	231254	194662	177169	166823	174391	169953	234159	226720	241460	249824	279749	284128	289093	258505
0	1.17135	36118.5	O35459	Ech1	Delta(3,5)-Delta(2,4)-dienoyl-CoA isomerase, mitochondrial	4.82419e+06	4824220	4.47631e+06	3.40788e+06	2.75657e+06	2.78635e+06	2.62773e+06	2908042	2.35278e+06	2003002	1.56494e+06	2.32189e+06	2.4443e+06	2.58438e+06	2.5453e+06	2.40071e+06	2.73792e+06	2.44746e+06	2.76227e+06	2777786
0	1.144	43528.8	O35465	Fkbp8	Peptidyl-prolyl cis-trans isomerase FKBP8	307513	287042	295622	279377	314083	307953	292761	307661	264147	195425	233619	228483	279566	299149	218879	270439	298681	323913	306430	292940
0	1.19289	70422.6	O35488	Slc27a2	Long-chain fatty acid transport protein 2	9754238	8924256	9699219	8721099	7.44791e+06	6954942	6.76237e+06	6702640	4.1016e+06	3.86493e+06	3.54976e+06	4.72634e+06	6.15461e+06	6.51837e+06	6705540	7367932	7249399	7.20488e+06	8051165	6948477
0	1.21529	45020.5	O35490	Bhmt	Betaine--homocysteine S-methyltransferase 1	183658912	129421832	152426672	174412976	137948192	131103240	121314928	137763888	122052336	148512048	121857608	170600704	141402880	212550496	123196080	164677808	120514464	129186208	113078368	106659512
0	0.992012	99523.8	O35551	Rabep1	Rab GTPase-binding effector protein 1	59447.8	15172.3	19095.5	17696.5	22846.7	43753.3	24440.3	42913.1	20200.7	19677.5	17164.3	16798.5	27114	19618.2	19952.4	5067.68	11374.5	18012.1	16258.9	13121.3
0	1.07807	28246.1	O35566	Cd151	CD151 antigen	70341	54560.6	65188.9	72940.4	63968.4	64946.3	69203.6	70812.1	82562.7	75671.3	86678.5	91213.5	57083.1	51656.6	61819	57937.1	59445.8	44791.1	61163.1	54063.4
0	1.17418	34577	O35593	Psmd14	26S proteasome non-ATPase regulatory subunit 14	985469	1.0083e+06	1.02557e+06	1.0297e+06	897348	1.04504e+06	1.1467e+06	845051	1.01482e+06	1.14158e+06	1.01689e+06	995928	1.07006e+06	1.16868e+06	1.1014e+06	1167274	887819	914959	953105	892810
0	1.01988	83968.1	O35598	Adam10	Disintegrin and metalloproteinase domain-containing protein 10	130110	101526	111471	117403	101895	116019	41084.5	98283.1	164533	177278	190195	209587	95615.5	92588.2	64796.4	80991.5	103098	15064.9	74971.9	104339
0	1.14181	142885	O35604	Npc1	NPC intracellular cholesterol transporter 1	327411	371668	290657	182150	203224	215496	176374	183056	271985	289662	254897	239228	174642	138716	150917	149046	146518	158863	166245	154916
0	1.15617	38458.1	O35609	Scamp3	Secretory carrier-associated membrane protein 3	537569	560482	479360	513637	527369	588233	462063	547764	448079	430357	549600	479899	460970	423468	412348	438129	336645	385065	345573	390897
0	1.1087	13274.3	O35623	Bet1	BET1 homolog	124157	117595	85863.5	119323	103862	127837	91963	71112.6	91696	81277.7	107576	95103.5	107378	129009	121363	114114	101700	139841	115739	100001
0	1.14326	36384.1	O35639	Anxa3	Annexin A3	86274.2	83811	72757.9	56003.7	55924.2	64906.1	69319.8	73197	196706	209587	217866	229056	96165.7	63729.7	67057.7	82158.8	60406.5	45494.9	48826.1	60570.7
0	1.15443	103935	O35643	Ap1b1	AP-1 complex subunit beta-1	1.03192e+06	1.06371e+06	1.09964e+06	1.07146e+06	1034439	967804	986366	841402	1.11925e+06	1174124	1.2187e+06	1.09645e+06	1.01592e+06	1.00733e+06	1.12044e+06	1.11802e+06	992372	1.00277e+06	1.11966e+06	981990
0	1.05417	44591.3	O35657	Neu1	Sialidase-1	64111	67975.7	63793.4	65447.5	48345.9	50147.6	64363.8	65708.5	53127.6	67968.5	59219.9	67352.1	50971.1	37986.4	43500.6	42854.6	63495.8	58945.3	50873.5	43331.6
0	1.15138	31012.9	O35658	C1qbp	Complement component 1 Q subcomponent-binding protein, mitochondrial	499482	605298	514171	469187	376050	611673	579592	458058	320750	400139	265507	239057	281287	361342	559753	455896	387598	377636	432191	477356
0	1.15085	25621.4	O35660	Gstm6	Glutathione S-transferase Mu 6	844363	735396	783528	895868	1.02759e+06	1.05354e+06	1.20986e+06	1.11856e+06	2.44219e+06	2.75796e+06	2.82155e+06	2157716	1.94114e+06	2.07438e+06	1.54811e+06	1.63724e+06	1.18099e+06	1534369	1.19294e+06	1.25848e+06
0	1.16162	33387.5	O35678	Mgll	Monoglyceride lipase	835835	727163	654963	726119	471788	445096	401885	396820	165396	94019	131858	106817	416038	608968	576553	529269	406809	384226	393197	212881
0	1.10453	15437.2	O35680	Mrps12	28S ribosomal protein S12, mitochondrial	92557.3	113063	110406	90198.3	99104.6	86368.5	83242	84737	81877	117059	107508	110574	104613	103308	121765	84811.8	106524	101249	103912	126723
0	1.14668	35284.6	O35682	Myadm	Myeloid-associated differentiation marker	306417	343230	287571	179558	162057	226691	245150	244943	617342	675026	672279	740167	410921	260913	311312	260205	253449	195846	263993	256027
0	1.14455	8138.52	O35683	Ndufa1	NADH dehydrogenase [ubiquinone] 1 alpha subcomplex subunit 1	1.30235e+06	1.36706e+06	1.24654e+06	872627	1.12615e+06	806025	778056	656853	1.55783e+06	1.57637e+06	1.41659e+06	1.42456e+06	1.69169e+06	1.5802e+06	1.23201e+06	1.19822e+06	1.72165e+06	1600491	1.53343e+06	1.58546e+06
0	1.14661	38358	O35685	Nudc	Nuclear migration protein nudC	604623	600077	538550	600306	598461	586142	560388	607495	524333	505072	569245	437365	540471	453904	480501	532259	466479	460422	493099	468074
0	1.15371	82435.6	O35691	Pnn	Pinin	311561	275200	298973	267221	227464	249220	263266	276883	309372	247358	332517	369280	239101	206656	216149	237526	243010	234064	241577	263632
0	1.02104	52534.7	O35704	Sptlc1	Serine palmitoyltransferase 1	41842.3	13950.4	20515.2	21828.8	21569.4	17725.7	12141.4	24344.3	67882.3	36452.8	91576.2	97723.7	8936.43	51522.7	36383.6	12269.8	40668.7	6675.54	27706.8	12161.2
0	1.10662	98752.7	O35711	Ppfibp2	Liprin-beta-2	426248	349056	389702	248984	202831	211356	264787	248974	119670	163343	145558	111226	168413	87710.2	65873.3	128136	106672	99396.9	96276.2	85749.8
0	1.16022	58720.1	O35728	Cyp4a14	Cytochrome P450 4A14	3.78063e+06	3349719	4.48466e+06	3164111	332048	620677	454405	700059	564784	259769	153521	447084	715876	2.02716e+06	1.17255e+06	856698	816500	425839	707596	778521
0	1.16291	49199.4	O35737	Hnrnph1	Heterogeneous nuclear ribonucleoprotein H	1914281	1796897	1893038	1.43473e+06	1.52042e+06	1.5023e+06	1.52247e+06	1.7577e+06	2.14108e+06	1.86085e+06	2.34298e+06	2.36469e+06	1.41494e+06	1.26481e+06	1.29378e+06	1.3628e+06	1565148	1.42068e+06	1.33724e+06	1.47562e+06
0	1.15693	44458.3	O35744	Chil3	Chitinase-like protein 3	104687	358467	92388.8	213326	54156.7	65544.8	51027.9	281854	732209	839440	832134	1.19244e+06	170351	84895.4	47583.1	73403.8	78075	64515.5	50421.7	69494
0	1.11783	56785.2	O35841	Api5	Apoptosis inhibitor 5	337931	336854	338198	307218	293176	312942	317466	337166	339306	314267	381562	361438	251090	231249	219889	271187	238797	242199	259036	262774
0	1.07754	44127.4	O35855	Bcat2	Branched-chain-amino-acid aminotransferase, mitochondrial	221087	160837	195351	249332	172936	239724	199340	222856	222425	309280	192047	213894	262828	196261	171277	222598	365543	138568	226433	160099
0	1.15973	51091.3	O35857	Timm44	Mitochondrial import inner membrane translocase subunit TIM44	822196	894433	893510	705689	804994	774596	787450	723138	823754	896219	799800	854702	860434	847313	883105	849340	883785	850124	845049	924405
0	1.10339	37548.8	O35864	Cops5	COP9 signalosome complex subunit 5	110694	123938	127594	129417	125777	152421	146347	135212	121313	134942	135984	112809	111833	116545	128523	145809	109304	116909	112392	113626
0	1.09028	56061.5	O35874	Slc1a4	Neutral amino acid transporter A	18498.7	8471.22	7282.26	6320.43	8419.63	17071.3	7878.87	20833.1	25804.1	24828.6	54207.7	31762.5	11329.1	17308.4	10438.1	4918	1362.8	7426.06	11134	22399.4
0	1.13529	37063.7	O35887	Calu	Calumenin	274167	317271	277067	289459	304241	356429	399281	417464	467253	410782	457321	449819	345466	259637	383132	317726	313312	304995	291620	359837
0	1.06801	10834.5	O35900	Lsm2	U6 snRNA-associated Sm-like protein LSm2	121778	112772	111501	87880.9	103518	80031.1	65809.8	67767	159415	161296	185106	158794	124498	108577	101354	114794	122651	123857	101340	116439
0	1.20487	54587.7	O35945	Aldh1a7	Aldehyde dehydrogenase, cytosolic 1	23929718	21177850	23240066	32024898	26194632	32687504	28327326	26232840	31578840	31061026	36252492	32449462	38897584	45214124	38544020	43010560	30185182	30989862	28759368	22187308
0	1.14452	29063.2	O35955	Psmb10	Proteasome subunit beta type-10	264479	169948	150697	151302	159845	84310	181621	204143	470191	515691	428050	400448	225254	170674	247873	205228	196083	119723	164023	175510
0	1.1513	26336.1	O35969	Gamt	Guanidinoacetate N-methyltransferase	1.19073e+06	1.18003e+06	1.22583e+06	1.89189e+06	2.02822e+06	2596440	2.31238e+06	2.08941e+06	2.13066e+06	1.91015e+06	2.14805e+06	1.39802e+06	2.22002e+06	2.38637e+06	1.65374e+06	2293178	2.29118e+06	2282830	1.94278e+06	2189378
0	1.1245	17121.6	O35972	Mrpl23	39S ribosomal protein L23, mitochondrial	162061	215461	200239	142651	159044	213968	209095	203836	179610	207423	176947	195333	189446	169509	199286	213014	156812	163897	162176	173785
0	1.08782	88062.7	O54692	Zw10	Centromere/kinetochore protein zw10 homolog	32274.7	27858.3	20953.3	21444.2	24344	32315.3	17882.7	29464	40885.1	37116.9	46198.9	35089.9	32280.3	31777.8	43616.7	29949.1	26037.7	21856.4	30349.7	26642.7
0	1.12444	43953.6	O54724	Cavin1	Caveolae-associated protein 1	117584	59083.5	79172.9	59187.8	67917.1	64681.5	52311.8	62461	140261	192848	62791.5	107697	171967	77900.6	50668.7	49514.6	249752	33034.8	184258	93786.2
0	1.1736	49027.9	O54734	Ddost	Dolichyl-diphosphooligosaccharide--protein glycosyltransferase 48 kDa subunit	6.00738e+06	6.03409e+06	5667213	5939805	5.69743e+06	6143324	5.43147e+06	5449737	5938332	5.64111e+06	6097986	5.9862e+06	4945570	4.1951e+06	4922596	4.92004e+06	4911215	5.55352e+06	5.34915e+06	5.60053e+06
0	1.15502	57784	O54749	Cyp2j5	Cytochrome P450 2J5	1.91966e+06	1686021	1.75695e+06	2.24108e+06	1.59676e+06	1.80995e+06	1.60624e+06	1.34479e+06	570032	576763	502284	612377	1.09762e+06	1.35272e+06	1.22087e+06	1.36096e+06	1.70829e+06	1.89904e+06	1.9055e+06	1905867
0	1.058	57791.9	O54750	Cyp2j6	Cytochrome P450 2J6	28891.8	37670.4	20973.7	13321.6	11785.7	11832.4	11734.4	3311.84	10242	9186.31	13049.1	8518.67	7419.68	9633.38	7006.75	18182.4	8331.17	8666.83	8512.75	6693.25
0	1.16521	146678	O54754	Aox1	Aldehyde oxidase 1	485995	431214	514610	695560	605319	746886	634038	637247	604499	615897	704042	556053	715453	656089	533158	589826	802544	773912	713663	644920
0	1.15518	135081	O54774	Ap3d1	AP-3 complex subunit delta-1	728008	894736	1.10269e+06	996642	781467	703137	923391	766441	1122785	1078151	1.33242e+06	1.10904e+06	909411	909631	810217	858745	761152	746261	867868	894391
0	1.09486	115610	O54782	Man2b2	Epididymis-specific alpha-mannosidase	61727.5	62087.5	47535.8	55163.3	36908.9	30021.5	29214.7	36477.8	50377	55725.6	60777.7	47244.8	36014.4	25257.1	25271.7	29832.2	35780.7	43848.4	36634.6	32899.6
0	1.09076	51984.6	O54804	Chka	Choline kinase alpha	106423	122666	84391.5	110919	106482	71859.3	93474.9	44717.5	227772	204572	230885	222090	126173	126286	106388	94770.5	82833.9	66099.1	43483.1	90116.8
0	1.08481	141435	O54824	Il16	Pro-interleukin-16	44870.1	62934.2	67343.2	57389.7	36338.8	45314	71927.6	67320.9	83374.9	79919.6	103072	120424	43839.6	25984	50849.7	51362	20308.7	35776.8	40172.2	59764.8
0	1.04363	49783.5	O54825	Bysl	Bystin	49712.5	60007.1	68841.9	50432.9	42458.2	46876.6	60365.3	65531.5	64895.6	52269.4	88249.5	83256.2	48368.2	46885.1	52089.1	51755.6	39808.7	43511.2	50747	44617.1
0	1.12455	41215.2	O54833	Csnk2a2	Casein kinase II subunit alpha'	42213.7	30192.3	25026.6	35600.7	60585.2	51328.2	37158.9	70678.1	71175.9	73740.2	74048.8	84519.1	82524.7	53057.4	64367.4	59621.6	64835.5	48281.3	56337.7	68632.6
0	1.0825	70597.6	O54865	Gucy1b1	Guanylate cyclase soluble subunit beta-1	22834	24544	21509.2	18256.9	23189.2	14234.3	21702.5	16260.3	41232	48058.7	56336.8	56836.2	30611.5	27504.3	25894.3	26744	23028.8	24392	24051.5	34029.3
0	1.13498	23010	O54879	Hmgb3	High mobility group protein B3	172070	184558	196890	170127	118817	152245	192705	142967	197105	167044	218407	155586	100384	106803	23620.8	144770	53432.1	59569.6	107561	96201.5
0	1.09921	86738.4	O54890	Itgb3	Integrin beta-3	117543	127567	97919.1	88201.4	72998.5	49397.4	41050.4	82737.7	128044	159813	107552	142427	65667.2	48310.8	52432.6	53309.3	54345.7	49561.6	53880.8	75773
0	1.04886	37993	O54904	B3galt1	Beta-1,3-galactosyltransferase 1	9951.03	21582.6	10325.9	10204.9	10796.3	9716.29	7529.18	7227.87	4990.61	5329.81	4811.3	6290.39	7166.67	3364.11	5606.42	5075.03	8147.15	9984.13	8286.44	8877.51
0	1.17185	35743.6	O54909	Rdh16	Retinol dehydrogenase 16	929623	821876	1.00846e+06	1.27897e+06	872480	1.00129e+06	1.11739e+06	799936	2.30386e+06	1.84166e+06	2.06487e+06	2.32976e+06	1607198	2.18879e+06	1864024	1564490	1443050	1.38303e+06	1.38259e+06	1.1227e+06
0	1.0482	86518.9	O54916	Reps1	RalBP1-associated Eps domain-containing protein 1	164520	191708	145865	136001	137670	142418	137493	141871	145192	134625	145853	139247	56393.1	95815.2	39152.9	47020.4	119422	92797.9	103083	91194.6
0	1.05838	37768.79;42178.35	O54940;Q8BHE3	Bnip2;Atcay	BCL2/adenovirus E1B 19 kDa protein-interacting protein 2;Caytaxin	10438.8	11512.5	12374.6	11166.4	11298.3	12959.9	12703.7	7199.06	22263.6	32200.4	33041.4	22892.2	11405.7	13039.5	17810	19443.6	10385.7	10829.5	16821.9	12631.6
0	1.0461	46638.4	O54941	Smarce1	SWI/SNF-related matrix-associated actin-dependent regulator of chromatin subfamily E member 1	105971	117180	111594	86726.7	116640	94358.1	83459.9	121503	85523.7	94582.1	97806.7	62230.4	60320.5	58570.5	74373.2	109526	91635.5	92131.5	98427	94178.3
0	1.08918	37520.4	O54950	Prkag1	5'-AMP-activated protein kinase subunit gamma-1	363418	269554	279351	397796	358356	304981	277716	278122	590976	592090	543564	529406	401582	411110	314303	431679	282122	303839	341909	372577
0	1.11888	10102.6	O54962	Banf1	Barrier-to-autointegration factor	353907	273270	1.82294e+06	1714871	236793	338976	2311367	2.10384e+06	569120	837586	3.25066e+06	3.58248e+06	258859	184877	2588725	2.40237e+06	261546	176057	1.78498e+06	1.95784e+06
0	1.14615	38822.8	O54984	Get3	ATPase GET3	215163	178489	261915	324085	252686	258854	297313	296515	402564	436436	431081	380174	407910	371605	414196	387962	302151	298897	312995	317124
0	1.10668	141457	O54988	Slk	STE20-like serine/threonine-protein kinase	56154	57233.9	42088	52217.9	47461.7	53871.2	37075	61036.2	74606.1	69263.1	66413.8	76984.3	55351.9	47108.7	42739.7	51547.7	53846.8	55489.2	50819.7	58512.6
0	1.11629	20302.1	O55013	Trappc3	Trafficking protein particle complex subunit 3	194090	201321	181429	152269	185870	125539	146839	167877	260485	261806	297421	315040	252852	214320	169387	185434	192367	177973	171870	217603
0	1.18795	21694.2	O55022	Pgrmc1	Membrane-associated progesterone receptor component 1	6.73595e+06	6.10899e+06	6380417	7098525	7484384	7082180	6.5087e+06	6000528	7.71059e+06	7166931	7.9754e+06	8704979	8587266	8440559	8550974	7.72338e+06	9536729	9325435	8954454	8579213
0	1.15255	30436.2	O55023	Impa1	Inositol monophosphatase 1	558917	519535	405882	531098	606574	580085	521048	622013	928176	979098	1.01356e+06	965112	711320	549693	544255	632392	669842	305730	570189	601096
0	1.17446	102449	O55029	Copb2	Coatomer subunit beta'	1.84317e+06	1.76399e+06	1.7137e+06	1.59567e+06	1513784	1.61073e+06	1.54544e+06	1.43645e+06	1.62562e+06	1.65968e+06	1.89523e+06	1669441	1.52414e+06	1.49269e+06	1.51448e+06	1549676	1.39807e+06	1.46668e+06	1.48858e+06	1.43301e+06
0	1.0734	14485.2	O55042	Snca	Alpha-synuclein	128477	107779	99164.6	56223.5	56957	62523.8	42216.8	60353.4	33690.2	44847.2	24461.3	34091.8	19568.7	28538.7	20613.7	28889.9	21555.4	20892.4	13981.1	40830.2
0	1.16658	27585.7	O55060	Tpmt	Thiopurine S-methyltransferase	1.20119e+06	1.35566e+06	1.29546e+06	1.34966e+06	1.45834e+06	1.59394e+06	1.3483e+06	1.71814e+06	1.75769e+06	1.85435e+06	1.94257e+06	1.56502e+06	1.67199e+06	1.66299e+06	1.34401e+06	1.69114e+06	1.40435e+06	1.52833e+06	1.42927e+06	1.23428e+06
0	1.15886	55996.5	O55071	Cyp2b19	Cytochrome P450 2B19	65220.3	223793	179456	60355	53312.2	30943.6	46456.4	35767.4	830984	829502	950684	510465	173990	300573	185770	372769	31025	25772.7	23154.8	34268.3
0	1.07653	14281.3	O55102	Bloc1s1	Biogenesis of lysosome-related organelles complex 1 subunit 1	73969.3	37617	55626	68228.9	70686.6	78877.1	73578.8	91339.3	110752	109704	150276	122397	113357	96625.8	100597	87831.1	91949.9	94502.2	44464.3	58972.6
0	1.09805	85965.8	O55106	Strn	Striatin	20998	22522.6	26080.3	23220.7	12737.1	8294.09	20148.5	31420.8	40248.6	41246	45475.8	46645.8	32186	32924.8	40513.3	30925.5	20746.1	36442.5	30852.5	33717.9
0	1.15971	122385	O55111	Dsg2	Desmoglein-2	176848	98393.3	174284	115149	145917	153027	212187	165591	150117	159529	193534	288334	126962	93569.4	127233	140816	167368	176863	220044	245255
0	1.18457	33363.2	O55125	Nipsnap1	Protein NipSnap homolog 1	7256762	7.81664e+06	7.6131e+06	7.33557e+06	6983030	6829356	7.53247e+06	6620601	7174512	7041769	6155819	6345680	7190259	7900909	7.29213e+06	7.13638e+06	7.92094e+06	8017639	8451344	8839699
0	1.07589	32932.7	O55126	Nipsnap2	Protein NipSnap homolog 2	84208.5	71057.6	67205.1	51160	42211.6	54471.3	56264.2	58454.2	115980	112481	106594	119069	63508.5	61632.6	99365	57287.9	121642	74500.3	79458.3	111506
0	1.05148	56177.5	O55127	Cyp26a1	Cytochrome P450 26A1	9545.67	6728.45	21506.8	162596	98624.8	179250	362072	343840	20055.7	28245.7	16269.6	127267	268543	310669	326301	177844	229163	263237	173410	115324
0	1.15358	17595.1	O55128	Sap18	Histone deacetylase complex subunit SAP18	354065	323029	326574	316345	290887	321575	337637	408439	319874	249083	355530	397231	273312	217353	234715	253454	241764	232668	284078	272206
0	1.14487	50549.8	O55131	Septin7	Septin-7	520663	544845	514644	448461	525726	451212	474109	540635	923850	980099	1.05365e+06	1149469	752541	665241	412135	421027	790660	693486	588804	827004
0	1.14599	26511	O55135	Eif6	Eukaryotic translation initiation factor 6	393193	410212	303568	266233	210967	287648	287382	316615	397898	437482	471789	472473	240058	181798	186950	211018	184337	169990	180102	190099
0	1.1597	46136	O55137	Acot1	Acyl-coenzyme A thioesterase 1	1.82158e+06	1.47806e+06	1.72384e+06	1.93191e+06	1.33308e+06	1.43593e+06	1.27956e+06	1.61523e+06	1.16096e+06	924535	704604	1.13305e+06	1.89598e+06	3045945	2091632	1.93728e+06	2152811	1775346	1.70404e+06	1.32782e+06
0	1.17579	12553.7	O55142	Rpl35a	60S ribosomal protein L35a	5.30527e+06	5.05812e+06	4.40506e+06	4609416	4737322	4.63591e+06	4.10706e+06	5411221	5602903	5300440	6.07978e+06	5977839	4.97601e+06	4.5025e+06	4.51989e+06	4624016	5909722	5.49476e+06	5160149	4.98432e+06
0	1.18989	114858	O55143	Atp2a2	Sarcoplasmic/endoplasmic reticulum calcium ATPase 2	3.41291e+06	3.30769e+06	3.29257e+06	3.34607e+06	3.10951e+06	3267995	3219165	3382478	3.12155e+06	2931776	3.18123e+06	3.4084e+06	2880998	2.4572e+06	2.86522e+06	2.83916e+06	2.63421e+06	2.57771e+06	2661269	2964571
0	1.07601	120664	O55201	Supt5h	Transcription elongation factor SPT5	42842.2	43578.5	47388.6	39689.1	39423.2	37958.2	40250.3	48074.9	40062.2	46397.2	55262	61157.6	37219.5	36964.1	34207.9	36472.7	35072.8	35638.5	35627.1	43427.7
0	1.15971	51373.2	O55222	Ilk	Integrin-linked protein kinase	816442	809516	782146	598673	681221	600387	561733	671574	776325	856936	868870	889118	559603	529745	491772	513731	581628	537244	528625	584272
0	1.13674	45126.1	O55229	Chkb	Choline/ethanolamine kinase	193199	200675	188096	178459	175491	191891	157041	157799	164635	197675	164332	133714	133602	152329	96529.6	126952	132860	136981	128996	124725
0	1.16097	28532.4	O55234	Psmb5	Proteasome subunit beta type-5	1.27176e+06	1.28112e+06	1.26952e+06	1.4409e+06	1.21453e+06	1.42879e+06	1.30358e+06	1.20985e+06	1.18902e+06	1.23737e+06	1.19012e+06	1.1645e+06	1.22122e+06	1350796	1.15327e+06	1279215	1.18217e+06	1.19577e+06	1.25948e+06	1.07257e+06
0	1.13375	29597.8	O55239	Nnmt	Nicotinamide N-methyltransferase	1.49001e+06	2.02996e+06	2322440	740730	423402	696071	655714	642623	212982	288438	213640	268195	296041	536267	423768	401750	302695	474570	315232	1.00938e+06
0	1.13911	25249.8	O55242	Sigmar1	Sigma non-opioid intracellular receptor 1	272347	283725	276637	210634	288322	286272	246874	352264	252599	173299	282752	157742	231458	296506	331609	300481	187919	210409	230337	208289
0	1.12717	16555.3	O70131	Ninj1	Ninjurin-1	64612.9	67964.2	64039.8	75213.3	70467.3	78791.4	48018	61559.9	19264.4	45225.2	31290.3	31667.6	32562.4	41380.9	21332.4	23094.9	31540.6	40191.8	29888.1	40817.9
0	1.15413	149475	O70133	Dhx9	ATP-dependent RNA helicase A	988621	921420	1156523	1.07192e+06	743206	753753	1.09121e+06	1.01861e+06	1.22106e+06	884889	1.44097e+06	1.44747e+06	843031	620560	969174	923965	979508	977985	1.0936e+06	1.08465e+06
0	1.15311	59485.3	O70145	Ncf2	Neutrophil cytosol factor 2	973799	974528	770804	848931	793393	923289	388271	847116	849164	814675	837923	913512	504588	565139	479509	335599	526644	621603	328866	421192
0	1.12273	29174.7	O70152	Dpm1	Dolichol-phosphate mannosyltransferase subunit 1	234579	227178	228670	277247	259700	260518	244948	241057	274064	262612	313693	320978	246283	184677	224762	258508	244676	218862	226194	209616
0	1.13909	63988.7	O70194	Eif3d	Eukaryotic translation initiation factor 3 subunit D	629103	633726	617314	606255	597890	632478	662906	636401	573858	577535	665225	598138	524112	502062	509878	543420	514950	524106	528796	489703
0	1.06787	16910.5	O70200	Aif1	Allograft inflammatory factor 1	90910.5	94956.2	84188	75239.6	46905	93945.9	83945.8	101571	79968	85923.4	116084	119191	56367.7	49501.4	53285.5	80411.9	44872.5	47175.8	48868.4	64330.5
0	0.995996	118608.52;129017.06	O70228;P98195	Atp9a;Atp9b	Probable phospholipid-transporting ATPase IIA;Probable phospholipid-transporting ATPase IIB	54850.2	63068.3	51607.9	53816.7	36800.5	37811	37664.6	24020.6	52942.4	44302.9	62925.9	57544.9	51952.6	34639.7	23070	48130.4	7374	44651.8	50427.8	43755.7
0	1.17559	28827.1	O70250	Pgam2	Phosphoglycerate mutase 2	2.50636e+06	2.43837e+06	2.3437e+06	2.91981e+06	2.8912e+06	2.96114e+06	2.69091e+06	2.44257e+06	3.36804e+06	3.61483e+06	3.43959e+06	3.55335e+06	3.61771e+06	3.52142e+06	3.19967e+06	3.13582e+06	3138867	3.14993e+06	2.82482e+06	3.01867e+06
0	1.13987	24693.7	O70251	Eef1b	Elongation factor 1-beta	491793	381910	377900	320419	401935	433591	338696	482689	740594	445812	623515	761015	736837	698044	543550	377938	867599	857972	412431	750308
0	1.15698	35738.6	O70252	Hmox2	Heme oxygenase 2	238594	239580	214587	169016	192668	195313	212306	185018	283158	330351	307990	286489	197689	181263	217380	215146	154679	183363	177596	183319
0	1.09489	19127.2	O70274	Ptp4a2	Protein tyrosine phosphatase type IVA 2	79142.1	52057.1	59413	94655.8	96743.6	101826	70611.4	102576	113815	99365.5	108191	111434	87899.7	73379.4	75308.1	71762.5	77110.4	72187.3	67730.9	54678.2
0	1.12095	24800.4	O70303	Cideb	Cell death activator CIDE-B	191466	237415	134694	186413	226760	156253	116542	88252.2	255608	224115	293338	253061	423654	452618	176428	341789	187697	231058	207729	143760
0	1.13483	136485	O70305	Atxn2	Ataxin-2	357988	429284	400848	270426	283364	243288	306234	318198	209566	208893	205347	201181	262502	298383	196669	273492	278718	266587	254192	302648
0	1.09475	87908.9	O70309	Itgb5	Integrin beta-5	38012.6	31058	31712.5	18021.5	24474	42817.3	15263.2	23756.7	136057	132909	141524	132503	64523.2	59187	38808.3	30516.7	46421.1	42252.5	48507.2	57858.5
0	1.15659	56888.4	O70310	Nmt1	Glycylpeptide N-tetradecanoyltransferase 1	747625	770000	699154	619132	504074	552434	524477	491798	521411	514344	637856	624740	536420	532632	514570	552295	477087	523687	483060	459459
0	1.04497	60484.3	O70311	Nmt2	Glycylpeptide N-tetradecanoyltransferase 2	109773	139189	90472.9	89580.6	90308.4	46713.2	89960.4	138434	131378	172928	255939	225439	95252.4	69741	86881.3	101065	51012.3	33294	41033.8	11467.6
0	1.12235	109940	O70318	Epb41l2	Band 4.1-like protein 2	240730	240366	220821	172740	212838	188147	199082	191663	353140	361320	385896	355121	206719	178327	248570	235515	186543	164009	202504	227764
0	1.18063	22228.7	O70325	Gpx4	Phospholipid hydroperoxide glutathione peroxidase	2.33806e+06	2.2277e+06	2.41818e+06	2328263	1.95803e+06	2.2118e+06	2.01769e+06	1.82545e+06	3160439	3.31207e+06	4.4195e+06	3.68109e+06	2.79613e+06	2.66545e+06	2.33054e+06	2.42523e+06	2260143	2.17212e+06	2.1033e+06	2.27415e+06
0	1.12472	93255.3	O70362	Gpld1	Phosphatidylinositol-glycan-specific phospholipase D	247184	246097	224078	257993	249895	224536	227966	237119	183036	262205	229564	258680	183704	148887	113551	191230	209017	195997	215107	238026
0	1.13313	38474.5	O70370	Ctss	Cathepsin S	148610	186294	126868	87760.9	118173	71958.1	104960	146589	353177	558293	481299	426488	123554	119492	108824	127241	98819.9	86101.4	87647.3	153343
0	1.12155	23348.5	O70378	Emc8	ER membrane protein complex subunit 8	146133	122396	136576	148062	139986	136826	141973	131687	150084	151165	167861	161805	139858	137746	129039	125216	159748	156978	152262	148068
0	1.16735	35774.4	O70400	Pdlim1	PDZ and LIM domain protein 1	713527	833794	748298	626020	701023	735667	795797	880373	1.1512e+06	1.0446e+06	1.31126e+06	1.13382e+06	837641	930319	595520	737383	632258	616309	585731	657136
0	1.13271	11451.3	O70404	Vamp8	Vesicle-associated membrane protein 8	558176	597085	598485	435624	410218	421187	469160	450743	714241	722684	664677	786890	538772	480933	430184	464582	530181	575553	524668	696074
0	1.05943	84533.6	O70423	Aoc3	Membrane primary amine oxidase	20781.2	9516.45	6482.42	14397.8	7494.87	15196.3	7013.5	7881.6	16271	48666.3	18056	8575.86	5480.82	11935.1	92302.4	13508.1	65081.6	6790.07	65475.6	24784.1
0	1.17265	28405.2	O70435	Psma3	Proteasome subunit alpha type-3	2.496e+06	2487468	2.29406e+06	2.43335e+06	2.48871e+06	2577668	2.48583e+06	2.57406e+06	2.87762e+06	2.88919e+06	2.90794e+06	2.90486e+06	2.78136e+06	2.76393e+06	2.44228e+06	2.45635e+06	2.57932e+06	2731377	2.396e+06	2.42793e+06
0	1.06462	29820.7	O70439	Stx7	Syntaxin-7	145621	150990	85361.8	106753	106908	76228.9	19724.1	57534.1	334541	369825	369437	391380	218182	147821	125682	114039	142266	125548	98416.5	154352
0	1.1202	52603.7	O70451	Slc16a7	Monocarboxylate transporter 2	37712.8	39307.2	53225.1	46590.8	37050.5	37591.2	29284.3	28596.3	41646.9	70597.4	48095.2	45442.1	58385	85804.9	37961.9	48245.4	31374.3	37122.2	38743.8	27500.1
0	1.07654	27706	O70456	Sfn	14-3-3 protein sigma	6544.24	255.635	7515.56	11280.9	8689.36	17618.2	8131.28	21500.5	33859.2	35584.1	37603.5	36885.5	15452.1	10294.4	2501.56	3989.81	14459.6	9633.25	10788.4	21704.1
0	1.18515	54832	O70475	Ugdh	UDP-glucose 6-dehydrogenase	6.10698e+06	5.22099e+06	6.16503e+06	6.82178e+06	5521265	7.02947e+06	6454437	6626100	13617599	16030800	18896252	15827265	11622968	11470711	7.9493e+06	9369906	7687817	7811667	6.69551e+06	8.35055e+06
0	1.10516	16352.8	O70480	Vamp4	Vesicle-associated membrane protein 4	971105	784811	861649	658132	537488	522429	684533	428257	364466	395973	295141	263794	298469	276406	516187	661342	238140	228993	203642	236246
0	1.15904	18757.3	O70492	Snx3	Sorting nexin-3	1.18401e+06	1150654	1.03913e+06	997566	1.10971e+06	1.00994e+06	962481	823543	1.1755e+06	1.38014e+06	1.30775e+06	1.30173e+06	1090594	984522	1.00598e+06	962175	970822	961666	954309	987739
0	1.14832	19115.7	O70493	Snx12	Sorting nexin-12	432520	444358	403190	423454	452682	432533	410785	484493	619767	665250	611141	671587	470969	446807	406090	405993	362276	394292	319803	380292
0	1.15687	34741.8	O70503	Hsd17b12	Very-long-chain 3-oxoacyl-CoA reductase	1.49581e+06	1.31245e+06	1.52901e+06	1.59905e+06	1.59932e+06	1.86753e+06	1.73042e+06	1.55299e+06	1.67925e+06	1.3817e+06	1.92387e+06	1.96915e+06	1.89994e+06	1.79523e+06	1.85431e+06	1.92767e+06	1.82338e+06	1.87009e+06	1.85026e+06	1.73789e+06
0	1.13156	73088.4	O70551	Srpk1	SRSF protein kinase 1	76206	64374.6	67935.2	60732.1	66684.1	81688.2	84206.3	78474.9	102511	86373.3	139049	93167	87829.2	76860.2	87992.8	80447.3	64388.6	79991.4	68501.3	75721.6
0	1.16055	84998.8	O70570	Pigr	Polymeric immunoglobulin receptor	477376	292050	559746	968258	1.04292e+06	910335	959166	1.16236e+06	809042	797146	526570	789209	793271	664564	731457	1.02481e+06	669786	695147	843628	568601
0	1.07442	46596.4	O70571	Pdk4	[Pyruvate dehydrogenase (acetyl-transferring)] kinase isozyme 4, mitochondrial	75600.2	187278	47258.6	11816	10266	13775.8	10465.5	18279.3	10168.3	16678.8	15637.4	12994.7	13906	14741.9	14800.8	13525.5	14161.9	15171.1	18169.8	18218.8
0	1.11417	47466.5	O70572	Smpd2	Sphingomyelin phosphodiesterase 2	108603	100991	90987.2	105048	117660	118230	90252.6	94868.9	163116	135993	174036	175722	149774	154602	134946	130066	114649	128013	121364	131963
0	1.05984	34412.8	O70579	Slc25a17	Peroxisomal membrane protein PMP34	173333	144016	248502	154918	135939	229735	249881	73115.8	98471	118844	96693.9	69357.2	100632	106371	234652	288797	53729.8	75474.1	179854	124714
0	1.02296	74399.2	O70585	Dtnb	Dystrobrevin beta	18997.3	20919.4	21254.9	16550.8	10663.1	13958.3	11929.8	7180.34	11595.5	8290.96	16493.3	13482.8	18199.4	15622.3	19067.3	24076.8	21168.9	24303.9	23263.1	26713.9
0	1.10352	105109	O70589	Cask	Peripheral plasma membrane protein CASK	87849.9	60922.5	89403.3	103489	62111.7	54111.2	79725.8	66446.5	89151.9	77241.8	81306.7	103956	61953.8	57572.1	58748.1	67013.7	89337.9	80012.4	98574.7	101659
0	1.14587	16533.7	O70591	Pfdn2	Prefoldin subunit 2	317290	351837	308880	290448	316112	301590	322672	310506	570773	580664	690219	634226	448013	432302	349050	357110	320011	367706	299265	320739
0	1.03956	32921.2	O88271	Cfdp1	Craniofacial development protein 1	12857.1	14116.8	13881.7	13910.7	13441.3	18048.4	17173.9	18907.9	11560.1	13310.5	6143.51	11250.8	10287.9	6452.06	9689.47	7552.46	9200.08	10473.6	8191.6	14485
0	1.0722	65225.2	O88291	Znf326	DBIRD complex subunit ZNF326	45927.3	47378.7	55476.6	43440.3	28913	31524	48929.7	52172.4	27555.5	20297.8	26214.9	30481.9	22880.2	20559	23527.6	35669.4	27190.5	24180.6	32640.4	33817
0	1.17606	66406.7	O88342	Wdr1	WD repeat-containing protein 1	1.71655e+06	1.81673e+06	1.65407e+06	1.72369e+06	1.69967e+06	1.7966e+06	1.92116e+06	1.8756e+06	3254450	3.45091e+06	3.4621e+06	3.39571e+06	2.00013e+06	1.75714e+06	1.68867e+06	1.78543e+06	1.42032e+06	1.48526e+06	1.40146e+06	1.67522e+06
0	1.11736	121484	O88343	Slc4a4	Electrogenic sodium bicarbonate cotransporter 1	480926	484202	349809	267739	175398	262547	268397	229005	122371	182855	154434	142032	104467	93711.6	176281	177120	104766	100356	139817	107606
0	1.12785	26713.5	O88384	Vti1b	Vesicle transport through interaction with t-SNAREs homolog 1B	138198	135037	119838	98406.3	130533	111175	91700.5	57825.2	227498	198333	214935	173829	165572	143783	153197	120703	168706	134997	133038	132765
0	1.05623	21777.8	O88425	Nme6	Nucleoside diphosphate kinase 6	18650	12080.7	20262.5	17950.5	10327.4	8540.93	12785.4	13436.6	25309.5	25756.6	19602	22574.1	10243.2	13073.9	20504.7	13008.1	23644.4	23334.6	21409.2	24800.9
0	1.17107	70350.7	O88428	Papss2	Bifunctional 3'-phosphoadenosine 5'-phosphosulfate synthase 2	1.02916e+06	1.07988e+06	1.20151e+06	1268624	1.46981e+06	1.40692e+06	1.49602e+06	1401583	1.93132e+06	1902443	1.70987e+06	1.59597e+06	2.03075e+06	2.87878e+06	1901385	2.43483e+06	1.59252e+06	1.63435e+06	1.36317e+06	1.34325e+06
0	1.14062	29758.1	O88441	Mtx2	Metaxin-2	826161	939463	896241	714575	737475	769655	799823	948486	688293	745077	574955	646782	700013	730488	799544	709252	729566	680729	749588	726776
0	1.18157	35660.2	O88451	Rdh7	Retinol dehydrogenase 7	9319248	8.17675e+06	8563278	12902641	13173326	11316248	12563301	11794008	13020648	11679162	11736544	14583600	15049020	13334832	13851572	12430740	17913892	17085966	17658626	17541822
0	1.15495	53918.7	O88455	Dhcr7	7-dehydrocholesterol reductase	743946	875080	922383	1.05824e+06	1.11717e+06	1.73037e+06	1.35288e+06	1.67066e+06	623464	620308	798967	675405	843293	1.0904e+06	769269	1248756	764606	856485	916955	939437
0	1.12846	28406	O88456	Capns1	Calpain small subunit 1	369593	407280	323970	336682	364434	281676	341412	286591	749823	716144	883726	813617	703466	628563	511310	364912	450493	433530	373889	341850
0	1.12861	68394.1	O88487	Dync1i2	Cytoplasmic dynein 1 intermediate chain 2	245695	270209	256085	308102	200193	287079	328516	367289	421561	430961	437312	465056	360223	313197	327803	325716	261154	260481	259614	283457
0	1.0468	139415	O88492	Plin4	Perilipin-4	77865.8	86711.9	56133.6	19267.9	26355.9	21128.8	14214.8	29094.3	38958.6	40060.9	41596.5	52683	15138.7	15278.9	26232.6	25790.3	82363.7	81172.5	48775.4	64473
0	0.954909	101672	O88508	Dnmt3a	DNA (cytosine-5)-methyltransferase 3A	10824	21775.6	42827.2	78786.4	61708.8	6641.13	13465.3	84959.7	36989.8	69129.8	56308.5	64715.2	61310	66799.6	6611.25	50270	8731.71	25556	63405.9	31600.6
0	1.13208	34490.2	O88531	Ppt1	Palmitoyl-protein thioesterase 1	521736	490271	441411	453078	423405	392406	380809	470433	440499	529326	451274	557031	349573	333204	295391	310057	409944	427978	358949	387369
0	1.06007	116859	O88532	Zfr	Zinc finger RNA-binding protein	141705	197139	137175	101878	138173	131673	74612.3	66100.4	97327.6	87513.2	44195.4	70806.4	90953.3	76490.7	122243	46293.5	63421.6	76178.9	50076	46136.3
0	1.1502	53874.1	O88533	Ddc	Aromatic-L-amino-acid decarboxylase	317013	277581	312065	369164	436204	422174	440712	375988	210436	252742	218570	204486	392729	340494	392503	440037	382711	410292	392377	427422
0	1.12617	47832.1	O88543	Cops3	COP9 signalosome complex subunit 3	321896	273827	297262	384679	408295	398069	283665	392814	283208	318070	324094	269774	275235	271856	257085	284480	279697	243250	253575	251792
0	1.14477	46284.8	O88544	Cops4	COP9 signalosome complex subunit 4	539572	462458	528002	595101	683102	601269	606020	659834	692525	706039	723612	663038	724607	679363	628900	605231	706477	711450	657849	667542
0	1.13261	35880.1	O88545	Cops6	COP9 signalosome complex subunit 6	285310	286448	248307	302078	312352	297720	307715	254454	353654	383510	354085	317740	299461	341234	263848	323448	266234	279731	286530	291249
0	1.01655	24483.5	O88552	Cldn2	Claudin-2	6977.06	23107.3	38437.1	42852.5	13596.1	15290.1	52532	69256.4	6245.87	27668.5	67658.8	56727.2	12274.8	35175.8	37941.2	46975.9	13117.2	13509	29030.6	26811.7
0	1.18653	37402.7	O88569	Hnrnpa2b1	Heterogeneous nuclear ribonucleoproteins A2/B1	11971384	12168945	12215834	10674623	7.77375e+06	8910790	9796828	13139683	12411119	10656799	12642456	14416351	10240378	7.74447e+06	7.50734e+06	8462462	11117899	10988527	10817179	13648956
0	1.16472	29486.3	O88587	Comt	Catechol O-methyltransferase	9579107	8.32649e+06	8813517	9186863	10783560	8036096	8911244	9320698	7267474	6653646	6.98369e+06	7107794	14435132	8277916	12303654	9791793	9811233	10416284	10039085	8414111
0	1.08253	20489.2	O88593	Pglyrp1	Peptidoglycan recognition protein 1	43307.4	190379	65444.5	95552.3	12744.1	6285.42	13618.8	168188	418691	356912	446833	651872	125739	70352.8	6313.82	9770.57	13994.2	4483.77	17292.5	14004.9
0	1.12098	28489.4	O88630	Gosr1	Golgi SNAP receptor complex member 1	80887.7	93070.8	97130.8	86264.9	82465.2	85424.2	86136.6	98092.5	90819.4	82458.1	101794	86990.8	84538.5	72633.6	73911.8	73851.2	64200.7	76953.2	66082.9	75131.5
0	1.11264	13552.7	O88653	Lamtor3	Ragulator complex protein LAMTOR3	119498	126468	91636.9	91110.5	91479.7	89606	65730.4	61210.2	128099	172109	142208	130432	80134.1	78898.4	98374.3	115359	80440.8	64705.8	64748	70672.1
0	1.15032	24451.9	O88668	Creg1	Protein CREG1	679969	584829	727043	693076	342574	501729	497010	565728	309119	453129	351646	316192	183321	261528	217009	228041	394600	440859	396441	436418
0	1.15739	49548.9	O88685	Psmc3	26S proteasome regulatory subunit 6A	726683	751066	701186	778364	682977	769380	736344	808014	823180	756906	813393	814798	813345	818544	769449	741871	756391	788409	658259	695309
0	1.17397	29800.5	O88696	Clpp	ATP-dependent Clp protease proteolytic subunit, mitochondrial	1.17612e+06	1.29401e+06	1342566	1.30833e+06	1.28291e+06	1.32372e+06	1.25943e+06	1.13044e+06	952294	1.08271e+06	911108	936760	1.1998e+06	1.30564e+06	1.17394e+06	1.15693e+06	1.4101e+06	1.38577e+06	1.45972e+06	1.52529e+06
0	1.05133	34381.5	O88697	Stk16	Serine/threonine-protein kinase 16	4850.46	8026.83	6898.69	6262.59	6520.43	8962.39	7801.18	15465.9	11849	5476.02	7510.91	7084	5537.62	8387.29	8541.22	8150.78	8343.81	8217.6	8205.55	8056.85
0	1.11782	47744.5	O88712	Ctbp1	C-terminal-binding protein 1	764560	781671	688386	599219	743510	705401	640057	701351	873871	764952	840239	930042	563770	493972	437074	470994	464517	593266	459977	471851
0	1.10973	82021.6	O88735	Map7	Ensconsin	159127	171583	133051	82181.5	60082.4	55329.6	54377.3	59589	55732.6	59742.6	64731	51571.4	54831.6	56218.6	59282.1	50316.6	54380.8	52631.3	44535	56509.2
0	1.15258	37316.9	O88736	Hsd17b7	3-keto-steroid reductase/17-beta-hydroxysteroid dehydrogenase 7	599217	712813	647807	422181	311692	447311	394863	446408	362816	315021	436200	437972	467192	569591	366569	413113	377067	385154	367749	357290
0	1.11737	532170	O88738	Birc6	Baculoviral IAP repeat-containing protein 6	58597.1	58463.9	50657.9	56313.6	51362.9	46616.7	52793	47462	80127.2	66034.5	95702.2	82567.5	58925.7	55410.9	51445.2	55326.4	48355.5	49635.6	43068.9	39259.7
0	1.13448	54325.1	O88746	Tom1	Target of Myb1 membrane trafficking protein	117934	111300	96660.4	89245.6	108423	111588	99403.2	89313.5	195289	223839	201949	190805	139632	141234	99732.5	91366.3	129158	121225	111486	123553
0	1.11951	32423.7	O88792	F11r	Junctional adhesion molecule A	345637	321681	351537	292196	274616	268530	325903	285287	333622	395953	326441	365621	289881	226142	292448	270555	288092	316688	314277	343874
0	1.07238	29473.5	O88796	Rpp30	Ribonuclease P protein subunit p30	28448.7	32905.9	24159.7	32741.3	36690.4	26579.8	22718.5	21440.8	42503.2	27527.1	38608.9	31557.7	18361.4	17997.5	18332.7	19603.3	21558.2	15445.4	14069.6	13126.1
0	1.05436	16404.9	O88803	Lect2	Leukocyte cell-derived chemotaxin-2	22241.5	10185.2	6056.8	7599.24	2532.05	4115.2	6553.01	17327.3	12068.8	7433.92	23034.1	27296.2	8153.11	10940.1	21472.8	6094.53	17942.2	4421.23	13386.8	3741.66
0	1.09653	35062.5	O88822	Sc5d	Lathosterol oxidase	40503.1	51424.5	41333.8	50551.4	45701.4	57987.6	41074.6	48114	33040.9	28946.7	52468.3	44193.1	52254	81900.7	58049	64567.5	62155.6	49292.9	48809.8	45593.8
0	1.10006	16329.1	O88824	Jtb	Protein JTB	84434.1	82813.2	90473.9	127785	103283	136582	109598	150624	151079	147257	158440	168594	139098	119701	104648	114380	104022	121427	108372	126613
0	1.12618	47359.9	O88829	St3gal5	Lactosylceramide alpha-2,3-sialyltransferase	319905	368431	351479	114629	113000	94945.3	82251.6	87985.1	64994.9	36861.6	93377.4	115468	34613.9	51546.4	54268.6	63764.3	54430	71933.1	74690.4	92809.1
0	1.15796	58330.3	O88833	Cyp4a10	Cytochrome P450 4A10	4728048	4360140	4538297	2.06709e+06	531956	584212	466284	714352	363970	250911	218936	245350	540873	1.32163e+06	580860	881967	644539	216495	470458	338841
0	1.03653	22656	O88843	Cradd	Death domain-containing protein CRADD	50054.4	54714.8	66498.3	67997.5	60971.3	48916.3	49260	55129.2	68266.8	69599.7	69524.2	70591.2	49891.6	57603.1	65746.3	50912.7	34512.7	36116.2	46436.8	49941.7
0	1.19691	46674.4	O88844	Idh1	Isocitrate dehydrogenase [NADP] cytoplasmic	16098785	14808554	14623279	18622918	18133174	20299668	18621378	18832014	16988376	16758343	16904880	17961990	20323780	19737868	15419450	17630542	20696590	22655638	18976974	19241372
0	1.13106	20911.7	O88851	Rbbp9	Putative hydrolase RBBP9	208775	202564	235173	262197	256088	285022	275147	279202	206399	206601	181837	190972	191906	184606	154662	220413	244319	264892	241387	259232
0	1.05818	33652.5	O88876	Dhrs3	Short-chain dehydrogenase/reductase 3	100344	68951.4	50694.2	135711	109388	99253.7	125294	88326.9	184472	146410	148699	182852	207050	167392	137955	130076	149833	116652	110104	101947
0	0.951961	23058	O88878	Zfand5	AN1-type zinc finger protein 5	8620.08	8828.08	6918.96	4444.55	3295.74	3291.12	13677.2	22724	2683.16	2027.62	12937.5	12398.7	2952.27	2804.18	6340.92	7101.29	4533.54	20915.7	3606.76	4513.35
0	1.11778	60597.3	O88908	Soat2	Sterol O-acyltransferase 2	365611	303002	360314	285567	286049	286500	282296	266830	488951	436596	385390	482501	356159	275290	262927	338741	374502	411471	416450	490506
0	1.12921	54018	O88947	F10	Coagulation factor X	340663	316084	326736	204303	205947	334443	237027	288035	247824	248522	193274	189117	369305	278616	269027	284154	174841	177640	174764	186185
0	1.14516	21834	O88952	Lin7c	Protein lin-7 homolog C	383812	359501	329646	390691	324640	295451	225774	303079	437216	490843	496466	494552	346656	344268	275087	308024	389682	368934	363043	412066
0	1.10586	32549.3	O88958	Gnpda1	Glucosamine-6-phosphate isomerase 1	169924	194980	159607	209095	210401	147191	187238	140787	283941	326822	322957	284429	207005	216628	131537	227343	221603	183462	169865	235544
0	1.15857	57706.3	O88962	Cyp8b1	7-alpha-hydroxycholest-4-en-3-one 12-alpha-hydroxylase	4350841	3.19849e+06	4415421	1.18753e+06	1078186	1.40747e+06	772217	784316	96681.1	66554.7	68638.5	74197	528021	627804	114703	368934	1.30293e+06	700196	799789	954914
0	1.12472	80028	O88967	Yme1l1	ATP-dependent zinc metalloprotease YME1L1	278909	301272	290856	179909	195454	167827	192729	218648	208460	206583	229116	250565	201340	203683	189365	183673	188406	199002	171717	201762
0	1.15531	44930.6	O88986	Gcat	2-amino-3-ketobutyrate coenzyme A ligase, mitochondrial	1.03182e+06	993426	1147562	1.02275e+06	1.22417e+06	1.14666e+06	1.09316e+06	1.12017e+06	986247	1.01311e+06	819080	904032	1.25582e+06	1.1861e+06	1.17002e+06	1.04671e+06	1.70393e+06	1.4354e+06	1.41844e+06	1.55532e+06
0	0.979693	152406	O89001	Cpd	Carboxypeptidase D	13160.8	13715.9	9937.53	6625.01	11058.6	16406.7	4656.66	16459.5	11165.3	5790.06	15522.8	14516.4	9117.45	7835.18	13631.9	8052.96	16314.4	12394.2	3712.32	6738.91
0	1.08344	14315.9	O89013	Leprot	Leptin receptor gene-related protein	27229.6	30493.5	33904	23932.4	23375.8	27976.6	24962	24087.7	45755.5	61573.2	50788.4	40866	25598.7	22983.7	27783.8	29325.1	13296	17790.8	28710	27237.8
0	1.14911	49373	O89017	Lgmn	Legumain	437846	600883	512506	446224	403266	382287	326833	315862	738773	1.00693e+06	787410	852314	409711	352459	436150	354076	525336	524149	451212	537552
0	1.12416	69379.1	O89020	Afm	Afamin	63435.8	64857.5	61613.3	90457.7	95461.6	57859.3	57816.2	96767.7	56884.6	41306.4	37112.3	45955.1	52248.7	48869.5	48067.2	44168.6	63885.5	55318.2	70834.6	72810
0	1.16444	61342.2	O89023	Tpp1	Tripeptidyl-peptidase 1	1.78407e+06	1.70238e+06	1.55956e+06	1.43056e+06	1.10112e+06	997335	998505	997331	1.665e+06	2.2724e+06	1.91385e+06	2.26789e+06	1.19047e+06	887298	1.07652e+06	930958	1.50662e+06	1628833	1.52059e+06	1.68194e+06
0	1.10911	30259.9	O89051	Itm2b	Integral membrane protein 2B	182940	137630	151441	164925	171668	193164	174664	213657	235356	232588	224603	243196	182847	176493	216272	192134	205201	203268	204182	188868
0	1.15605	50989.2	O89053	Coro1a	Coronin-1A	250805	301177	211884	258423	198237	183402	199365	398448	1.29262e+06	1.52379e+06	1.78289e+06	2.20487e+06	390434	202460	227151	257728	206568	181293	177675	286818
0	1.15989	34567.1	O89079	Cope	Coatomer subunit epsilon	454874	431411	376860	414147	284125	365113	352247	336655	445287	415835	486432	476308	395817	363739	315617	328067	391577	399776	362414	388359
0	1.15462	16604.7	O89086	Rbm3	RNA-binding protein 3	481379	385711	472304	175016	81636	95312.9	154546	140237	1.40319e+06	1.2961e+06	1.84311e+06	1915395	212904	269283	157770	176431	230928	315112	202040	334751
0	0.909737	80731.9	O89090	Sp1	Transcription factor Sp1	19424.2	8895.04	16825.8	12344.9	8018.46	16257.9	13738.1	19840.5	9856.01	9073.58	16876.9	17610.2	13262.3	6327.11	18752.9	1083.15	15669.5	7072.23	11691.1	23520.1
0	1.10556	17234.6	O89106	Fhit	Bis(5'-adenosyl)-triphosphatase	67469.7	61529.5	66998.7	51147.9	39302.1	40340.3	60729.3	30720.6	81655.5	105721	94118.5	58551.8	70062.6	80235.9	57921.7	113033	44888.3	43646.5	54543.5	83580.1
0	1.12959	55356.9	O89110	Casp8	Caspase-8	190034	216161	181386	176608	170797	186698	176823	180630	194272	181838	185975	215620	193567	167857	136701	164021	136048	148786	147388	113563
0	1.12747	45341.1	O89112	Lancl1	Glutathione S-transferase LANCL1	185728	143879	51089.5	92363	207860	188634	89371.2	125048	245938	215257	227007	197539	201920	191063	118026	149656	299955	264295	266381	348739
0	1.14967	43209.6	P00158	Mt-Cyb	Cytochrome b	852534	952911	1.01836e+06	883319	1.07433e+06	1109787	960551	885238	782389	761875	641916	600670	765405	836752	986689	852642	873656	830829	984656	824305
0	1.17047	58183.9	P00186	Cyp1a2	Cytochrome P450 1A2	2749955	2902691	4206547	5230187	9262266	10069719	9774217	10072838	3330973	3032304	4314403	4.6522e+06	5.17514e+06	4403930	5.49544e+06	4.51757e+06	6216673	5970456	7231616	2743642
0	1.21529	39771.4	P00329	Adh1	Alcohol dehydrogenase 1	69068544	55278704	60213452	77561152	75679632	72528392	68665664	69674544	112381592	102468160	93318136	108066952	121399376	106617480	83108560	78414672	88505416	98514936	75713432	76479432
0	1.16408	21606	P00375	Dhfr	Dihydrofolate reductase	1.19489e+06	1.19661e+06	1.28077e+06	1.49815e+06	1.54098e+06	1546373	1.64806e+06	1757820	1.88586e+06	1.84999e+06	1.81418e+06	1.6749e+06	1.74383e+06	1639750	1387212	1.6939e+06	1.31028e+06	1.39714e+06	1356105	1.54282e+06
0	1.15829	56910.1	P00397	Mtco1	Cytochrome c oxidase subunit 1	383288	538234	460106	366097	406443	998515	914234	404525	229794	301444	243206	150157	156822	253203	288081	656682	242777	237610	408789	324834
0	1.18324	25976.4	P00405	Mtco2	Cytochrome c oxidase subunit 2	19419290	19985900	17590698	16003461	19881898	18329012	17461434	13756292	14637408	15545441	15473350	16606411	21169188	21016834	17789000	19122254	18491122	20519276	19725988	22287754
0	1.13877	29922.8	P00416	mt-Co3	Cytochrome c oxidase subunit 3	601243	671455	576758	589630	636485	917127	866238	791886	468133	498790	353035	348068	420964	521397	620075	740060	415649	488710	673221	563780
0	1.16749	24570.4	P00493	Hprt1	Hypoxanthine-guanine phosphoribosyltransferase	1.08254e+06	1.05517e+06	877464	833382	708838	957602	820429	789187	1.01831e+06	1.08377e+06	1.10672e+06	1.06579e+06	834643	824207	708451	815760	733276	785382	712682	716214
0	1.1259	16820.2	P00683	Rnase1	Ribonuclease pancreatic	8708.2	18670.4	14880.5	13141.3	14708.3	17162.1	14775.3	15288.5	528503	19098	12771.9	13304.7	14757.8	26867.4	10056.3	14299.7	292508	23495.9	18437.2	5981.33
0	1.17187	57318.3	P00688	Amy2	Pancreatic alpha-amylase	31412.4	31518.6	33950.5	27781	33538.5	23330.1	47133.6	26150.8	5.05876e+06	224043	45651.8	28014.9	93197.8	26859.1	24768	29245.6	1.63002e+06	29544.7	25078.8	31701.7
0	0.98378	25095.6	P00848	Mtatp6	ATP synthase subunit a	339983	45425.6	389143	239454	13996.2	60331.4	329512	166727	22971.5	361216	397416	283554	217496	120035	7980.21	7125.73	200404	185183	34583.2	32922.1
0	1.1503	29032.5	P00920	Ca2	Carbonic anhydrase 2	1.00992e+06	731776	788104	495510	389525	429016	277194	349744	370385	424259	258752	340071	233056	205999	215799	218331	226768	71250	167388	384497
0	1.202	186484	P01027	C3	Complement C3	4041549	3.43512e+06	2.69702e+06	5.9127e+06	3574508	3385561	3.28996e+06	4.12633e+06	5.00792e+06	4664722	4.15934e+06	5.58396e+06	3.3458e+06	2805137	3.31241e+06	2.81781e+06	2.9327e+06	3.90256e+06	3271363	4109017
0	1.17158	192915	P01029	C4b	Complement C4-B	940502	932241	803663	1.12542e+06	840294	918108	732526	973540	675220	673920	686754	794311	586345	568244	721007	701128	584153	961412	643936	718196
0	1.06303	18013.5	P01592	Jchain	Immunoglobulin J chain	117751	124500	165976	230924	130460	141034	129048	175871	227879	281627	143314	322634	192131	140339	131256	99167.8	286832	211453	177704	428727
0	1.0938	16433.58;14901.9	P01633;P01634	Igkv6-17;	Immunoglobulin kappa chain variable 6-17;Ig kappa chain V-V region MOPC 21	143651	356331	241716	338367	212394	118439	135274	135273	489880	244780	262089	421148	153156	173096	51212.3	156265	377055	211566	282661	589650
0	1.10845	12581.3	P01635	Igkv12-41	Immunoglobulin kappa chain variable 12-41 (Fragment)	52765.5	142201	122840	159312	172110	33530.9	26172.7	38605.4	135612	182716	124971	38742.9	45550.6	62399.5	62101	15438.6	134452	11005.7	16183.1	125928
0	1.09839	12030.4	P01636		Ig kappa chain V-V region MOPC 149	8050.92	15285.1	9361.93	27821.9	23307	15125.7	7460.02	3611.28	58505	77181.5	54198.3	50626.3	37450.6	11089.1	15194	21783.4	53727.6	46667.7	21656	110313
0	1.05264	14385.54;12985.84	P01637;P01638		Ig kappa chain V-V region T1;Ig kappa chain V-V region L6 (Fragment)	74655.7	86505.1	83936.9	177137	242145	127869	17568.2	77549.8	399300	596838	361905	576326	19868.1	133395	21444.4	100185	112879	21647.5	42487.8	227744
0	1.0649	12615.1	P01642	Gm10881	Ig kappa chain V-V region L7 (Fragment)	48033.5	101801	58554.6	46043	27073	14278.6	49045.3	15320.7	62240.8	117064	95031	117993	9486.88	34505.5	10086.8	16328.6	57250.7	26165.6	32102.5	91611.3
0	1.06446	11980.41;12054.49;11904.32;11949.4;NaN;12099.42;11964.11;12002.2;11952.19;12071.27;11950.17;12011.21;12039.5;12010.49;12038.55;11986.51;12042.44	P01654;P01655;P01656;P01657;P01659;P01660;P01664;P01665;P01666;P01667;P01668;P01669;P01670;P01671;P01672;P01673;P03977		Ig kappa chain V-III region PC 2880/PC 1229;Ig kappa chain V-III region PC 7132;Ig kappa chain V-III region MOPC 70;Ig kappa chain V-III region PC 2413;Ig kappa chain V-III region TEPC 124;Ig kappa chain V-III region PC 3741/TEPC 111;Ig kappa chain V-III region CBPC 101;Ig kappa chain V-III region PC 7043;Ig kappa chain V-III region PC 7183;Ig kappa chain V-III region PC 6308;Ig kappa chain V-III…	149778	62267.5	80413.8	225543	169174	125308	82421.8	99600.1	127148	183020	76669.9	108240	68729.3	146954	48972.6	90133.9	133256	78498.2	57261	231724
0	1.05093	12221.71;13465.22;13529.28;12221.79;13418.25	P01723;P01726;P01727;P01728;P01729		Ig lambda-1 chain V region;Ig lambda-1 chain V region H2020;Ig lambda-1 chain V region S43;Ig lambda-2 chain V region;Ig lambda-2 chain V region MOPC 315	1.06347e+06	1.46878e+06	869069	829095	1.36798e+06	1.04647e+06	1.0582e+06	1.71506e+06	1.05829e+06	1169760	937506	648875	632192	675723	482591	695765	157226	88486.2	23778.2	509018
0	1.07682	15514.36;13306.83	P01746;P01747		Ig heavy chain V region 93G7;Ig heavy chain V region 36-65	9313.22	12073.1	43027.9	13727.4	16499.2	11962	28354.7	11825.5	25210.3	41098.6	14718.9	26158.3	21743.6	24204.8	9646.6	8613.69	68370.2	66188.5	37390	187801
0	1.02665	12920.76;12876.73	P01754;P06328	Ighv1-62-3;Ighv1-72	Ig heavy chain V region 1-62-3;Ig heavy chain V region 1-72	15003.5	10391.5	6203.19	9311.06	7172.02	14541.7	6711.39	13942.3	23258.5	17508.6	20899.5	47931.1	18721.1	13197.6	14476.3	25091.8	24719.3	21690.2	8205.26	49356.1
0	1.04432	12675.21;12671.22;12647.2;12675.21;12732.3;12810.33;12887.46	P01796;P01797;P01798;P01799;P01800;P01801;P01802		Ig heavy chain V-III region A4;Ig heavy chain V-III region U61;Ig heavy chain V-III region E109;Ig heavy chain V-III region ABE-47N;Ig heavy chain V-III region T957;Ig heavy chain V-III region J606;Ig heavy chain V-III region W3082	25152	11518	68520.6	8593.66	21795.3	12555.6	33387.7	3653.25	7611.53	50288.3	30057.3	29782.9	2141.3	22453.1	52089.2	11160.7	20311.2	13736	23240.1	46306.3
0	1.15429	11934.1	P01837	Igkc	Immunoglobulin kappa constant	311153	427749	489402	597399	365122	316584	386202	301265	573929	676387	459986	778524	295222	353387	240528	253736	536915	378087	279683	825403
0	1.10948	11574.8	P01843		Ig lambda-1 chain C region	114506	82212.9	59352.5	19587.5	37682.6	48452.6	35984.7	55492.8	67054.6	107996	40160.2	100022	42550.7	59799	36345.1	35202.2	65969.2	49233.1	39635.5	84279.2
0	1.14034	36389.45;36595.9;43949.13	P01863;P01864;P01865	Ighg;;Igh-1a	Ig gamma-2A chain C region, A allele;Ig gamma-2A chain C region secreted form;Ig gamma-2A chain C region, membrane-bound form	117333	122793	376206	206843	285131	45004.5	44541.6	18177.7	312655	600098	276141	634329	242882	433569	168099	166274	661572	384747	224161	722695
0	1.12422	44259.4	P01867	Ighg2b	Immunoglobulin heavy constant gamma 2B	215812	215563	532558	203718	349027	128097	146668	162378	441594	636725	393537	573732	316023	371681	241031	274325	874996	602737	336070	1.11616e+06
0	1.13071	35704.56;43386.5	P01868;P01869	Ighg1	Ig gamma-1 chain C region secreted form;Ig gamma-1 chain C region, membrane-bound form	588008	669691	485158	365868	323252	199640	306674	211295	1256592	1.16587e+06	1.10747e+06	1.29857e+06	482447	413439	277667	328246	505434	608177	282737	1.47622e+06
0	1.15213	49972	P01872	Ighm	Immunoglobulin heavy constant mu	1.00329e+06	980528	1.78064e+06	2051889	1.43111e+06	779591	431219	615845	513152	827202	515121	1.04081e+06	393998	1.30403e+06	445154	368227	898123	336539	405616	922998
0	1.11583	36875.9	P01878		Ig alpha chain C region	207183	135850	142541	320586	175389	210240	206300	226596	430595	544978	287553	507887	380236	158718	199145	147382	514513	394802	383040	811042
0	1.16624	13779	P01887	B2m	Beta-2-microglobulin	3.23863e+06	2940774	2.76157e+06	2354974	3.11847e+06	2.35844e+06	2166001	2946739	3.72817e+06	3505596	3.97843e+06	4.25757e+06	3.78283e+06	3.50495e+06	2.77801e+06	2.31638e+06	3.36709e+06	3.47237e+06	3.13268e+06	3.56099e+06
0	1.15699	37251	P01898	H2-Q10	H-2 class I histocompatibility antigen, Q10 alpha chain	463594	494529	379167	279548	337294	326682	254288	294847	388158	344853	462490	336646	447764	544314	382772	447804	397887	401316	386868	336147
0	1.17428	40836.2	P01899	H2-D1	H-2 class I histocompatibility antigen, D-B alpha chain	1.2805e+06	1.20197e+06	1.08852e+06	548774	728702	713819	650568	585324	1.18932e+06	1.30348e+06	1.23246e+06	1.16538e+06	788594	803445	797837	782615	749790	830506	696966	881470
0	1.14796	41301.8	P01901	H2-K1	H-2 class I histocompatibility antigen, K-B alpha chain	1.88988e+06	2.21062e+06	1.72091e+06	1.07423e+06	1.40012e+06	1.41277e+06	1.31275e+06	1.25245e+06	1.64785e+06	1.58625e+06	1.58519e+06	1.8028e+06	1.54113e+06	1.49361e+06	1.40745e+06	1.46769e+06	1239328	1.43143e+06	1241821	1.45487e+06
0	1.06544	28351.29;24463.71;28243.24;28093.01;25930.21;25900.25;25801.06;25135.5;28012.85	P01910;P04227;P04228;P14434;P14435;P14436;P14437;P14438;P23150	H2-Aa;H2-Aa;H2-Aa;H2-Aa;H2-Aa;H2-Aa;H2-Aa;H2-Aa;	H-2 class II histocompatibility antigen, A-K alpha chain;H-2 class II histocompatibility antigen, A-Q alpha chain (Fragment);H-2 class II histocompatibility antigen, A-D alpha chain;H-2 class II histocompatibility antigen, A-B alpha chain;H-2 class II histocompatibility antigen, A-F alpha chain;H-2 class II histocompatibility antigen, A-R alpha chain;H-2 class II histocompatibility antigen, A-S a…	52632.7	31373.1	46174.5	103852	37547.2	69697.5	49917.4	81275.7	88891.5	72032.9	115534	124550	48983.5	43957.6	33840.7	41110.4	55238.5	40825.1	32798.8	34659.4
0	1.18466	15085.2	P01942	Hba	Hemoglobin subunit alpha	581913792	430735584	643190272	399924576	337632768	278233856	224751328	274425056	285399872	329073792	215406896	319111808	180346864	198335072	156871376	180035056	232184496	173045440	160967872	337224896
0	1.19055	15840.2	P02088	Hbb-b1	Hemoglobin subunit beta-1	615393856	440267328	570242368	345937824	305737600	221701440	172610064	295650560	338831616	338745856	266064368	369709824	216867456	226189920	157975920	147698768	253139728	195696544	153577536	361277088
0	0.817737	15878.2	P02089	Hbb-b2	Hemoglobin subunit beta-2	242053	121943	261307	6105.38	15699	64926.9	16776.4	6344.67	12772	107798	10547.4	10108.2	70619	16892.1	9492.3	8710.43	107303	79847	15226	7568.35
0	1.21508	15314.9;15327.91	P02301;P84244	H3-5;H3-3b	Histone H3.3C;Histone H3.3	2.58737e+06	2.09646e+06	36189216	33214420	564545	571426	29310408	35023036	767398	636264	44928532	46714304	667782	923588	27051978	25636442	559158	668039	23417476	25574214
0	1.05674	177298	P02468	Lamc1	Laminin subunit gamma-1	9152.89	8749.7	15706.6	8650.7	13584.9	6700.1	7205.78	24119.7	16249	16859.5	31871.2	23962.3	17047.3	10298	14140.3	10311.1	17298.2	19705.4	10032.6	16001.5
0	1.14735	57769.8	P02535	Krt10	Keratin, type I cytoskeletal 10	384678	861333	357070	702185	411295	623774	573162	439801	385540	796495	557925	376113	229231	389797	366800	588081	360971	352843	397267	702761
0	1.17698	6115.21	P02798	Mt2	Metallothionein-2	5.96508e+06	7.66603e+06	8.24538e+06	3789693	567944	163241	193352	993764	1.1555e+06	1.55032e+06	852876	1.15212e+06	169547	352576	313922	383188	45353	111629	28235.7	546733
0	1.12521	6018.09	P02802	Mt1	Metallothionein-1	664277	622906	1.01481e+06	404420	115520	59328.6	72885.2	164740	144769	250912	85397.1	122683	46332.2	60329.1	64345.7	58292.5	97654.3	103237	107475	99152.8
0	1.14207	36059.2	P03888	Mtnd1	NADH-ubiquinone oxidoreductase chain 1	412571	572540	482378	403298	381727	566311	602559	397345	385540	442532	352758	286214	232729	378926	461438	506509	307829	315818	477828	361660
0	0.992389	38752.4	P03893	mt-Nd2	NADH-ubiquinone oxidoreductase chain 2	10190.6	25250.8	23034.9	14519.1	12495.3	33526	29640.1	2744.89	15526.6	35197.4	17387.3	12865.2	54801	12179.7	25357.5	47042.5	8543.56	21705.9	40953.1	22335.7
0	1.14966	13218.9	P03899	mt-Nd3	NADH-ubiquinone oxidoreductase chain 3	1.03197e+06	1.10723e+06	1.15322e+06	993025	1.2534e+06	1.37437e+06	844194	1.06017e+06	1125982	1.29263e+06	975086	899487	1.05982e+06	1.03867e+06	1.26345e+06	1155459	1.21557e+06	1.1345e+06	1266400	1271130
0	1.15509	51881.8	P03911	Mtnd4	NADH-ubiquinone oxidoreductase chain 4	488289	513879	358089	335888	356645	436338	541333	398694	317389	318587	238648	289781	262511	300405	293758	237341	196671	190887	184354	241562
0	1.12253	68474.8	P03921	Mtnd5	NADH-ubiquinone oxidoreductase chain 5	168525	196035	215454	187676	214515	258534	288925	249892	146323	201400	149585	142920	148359	199402	195656	140950	149365	132490	193785	151979
0	1.13056	7766.28	P03930	Mtatp8	ATP synthase protein 8	3.22424e+06	3.06647e+06	2.9216e+06	2.54107e+06	1.28688e+06	2365150	2.77006e+06	3.12287e+06	1.23882e+06	2.09643e+06	1.47001e+06	1782463	2.31213e+06	2.02395e+06	2.25284e+06	1.99616e+06	3.27794e+06	2.77833e+06	2.65665e+06	2528401
0	1.07281	28056.8	P03953	Cfd	Complement factor D	81035.9	20076.1	18808.1	96472.9	112909	60180.6	72503.5	61642.8	149923	139030	101068	22208.9	68239.9	19141.8	26901.3	8972.7	46415.2	39190.9	53490.6	97514.5
0	1.07998	39991.6	P03958	Ada	Adenosine deaminase	128069	126652	62092.2	76365.6	86495.8	80733	86124	75790.5	162056	165701	162350	188060	82089	83809.2	73701.4	64036	152650	134408	115643	101496
0	1.09028	12390	P03976		Ig kappa chain V-II region 17S29.1	18593.1	52253.9	62336.7	12387.1	92476	38049.5	70022.8	23608.7	46053.9	32170.9	41355.4	50635.2	51588.7	93782.2	19258.7	27679.4	124038	123101	38637.5	131214
0	1.12473	43929.1	P03987		Ig gamma-3 chain C region	10319134	11318067	11823184	7080981	7.89308e+06	6389510	6.01891e+06	7.04804e+06	7.02941e+06	8111790	6777413	8576735	6.16977e+06	4.64488e+06	4.07285e+06	4.7216e+06	8622004	5979091	4.85249e+06	6526434
0	1.17184	65605.9	P04104	Krt1	Keratin, type II cytoskeletal 1	389908	1.25418e+06	398618	496796	414766	323575	411790	746519	184240	806501	425895	345602	50339.6	390939	276463	625526	308982	297884	225582	667063
0	1.16532	14649.9	P04117	Fabp4	Fatty acid-binding protein, adipocyte	1.02806e+06	1.19317e+06	701454	735085	821786	787514	694317	675951	1.13631e+06	1.32256e+06	1.31818e+06	1184253	845166	741410	608776	762585	930386	606102	655044	665232
0	1.15283	85004.5	P04186	Cfb	Complement factor B	444129	444823	259642	480083	412724	328655	289253	321288	665789	604892	643235	707346	400759	269958	329090	302393	316429	360085	351368	347986
0	1.1122	17069.7	P04247	Mb	Myoglobin	16160.7	28057.5	13274.8	14050.4	9696.6	11972.2	11545.7	13720.1	9862.69	9892.03	14172.4	13217.5	16464.9	9474.2	12844.5	13161.8	76787	26990	11493.5	12525.1
0	1.10887	67581.5	P04627	Araf	Serine/threonine-protein kinase A-Raf	189951	193532	188272	174890	181893	183321	171894	151083	174839	194825	203562	196999	168639	169538	141264	182666	160583	176866	154233	144065
0	1.15371	103136	P04919	Slc4a1	Band 3 anion transport protein	2113845	1488909	1.87651e+06	1.13735e+06	1.01087e+06	748201	706557	933623	854070	1.01551e+06	582561	921365	414928	491269	398801	412763	626982	450076	395650	983293
0	1.13986	21464.7	P04939	Mup3	Major urinary protein 3	782705	1.10153e+06	667343	872074	1.45133e+06	1.51086e+06	1.5152e+06	962948	60923.8	33571.6	85116.1	70944.2	502092	314206	806472	936178	1017108	969279	1.05643e+06	463067
0	0.994695	11560.99;NaN;NaN;NaN	P04940;P04941;P04943;P04944		Ig kappa chain V-VI region NQ2-17.4.1;Ig kappa chain V-VI region NQ2-48.2.2;Ig kappa chain V-VI region NQ6-8.3.1;Ig kappa chain V-VI region NQ5-78.2.6	49604.8	18113.6	27028.6	24749.3	21447.1	10577.8	22919.1	8667.77	71669.5	65482.8	37765.2	17466.3	7781.41	50840.7	20781.7	42265.7	8315.48	177802	95269.6	130284
0	1.09747	11713.3	P04945		Ig kappa chain V-VI region NQ2-6.1	31491.8	7073.18	212716	208506	113399	68247.5	9436.15	7324.74	14117.8	19230.7	50181.9	69210.7	13205.9	51904.9	49702.5	18174.2	74449.3	7904.25	9296.55	30646.7
0	1.04881	17093	P05017	Igf1	Insulin-like growth factor I	155789	317436	131776	75123.3	42081.6	27037.9	13496.2	42171.8	39778.6	45711.4	11119.1	29926.1	33045.6	34949.7	41192.3	41054.6	33464.1	37220.7	30158.1	34233.8
0	1.13291	39394.9	P05063	Aldoc	Fructose-bisphosphate aldolase C	333640	345799	357027	249371	359710	387825	390693	380493	371012	394305	384113	339213	495452	393671	247306	418995	363131	354681	311122	384789
0	1.1736	39355.9	P05064	Aldoa	Fructose-bisphosphate aldolase A	29870432	30306044	27406634	19565006	19269544	19631252	17234178	19282632	42219400	47954360	42852756	43113120	25500928	20834644	18659260	17619974	24873106	19946416	17515120	24596408
0	1.12687	40570.6	P05132	Prkaca	cAMP-dependent protein kinase catalytic subunit alpha	62177.4	60433.3	53183.7	81220.6	76706.2	97667.9	87619.7	98087.7	76134	85012.1	84522.6	85315.3	73890.4	74257.2	80837.9	89264.7	63084.3	63229.5	70332.4	61054.4
0	1.19147	46247.6	P05201	Got1	Aspartate aminotransferase, cytoplasmic	16617792	17533784	19465000	13021917	9450183	10250982	10218683	9802455	10330243	12643305	8457491	8480441	8462628	12244648	8803834	10154876	7.04295e+06	8384304	7168918	18441868
0	1.20186	47411.4	P05202	Got2	Aspartate aminotransferase, mitochondrial	26126826	28750902	25874382	23789704	22817486	23985414	22578768	21863180	25493156	25961922	22922820	24650412	23603120	25336514	24026144	24757460	24797438	23407420	24407166	25557254
0	1.10345	28913.7	P05208	Cela2a	Chymotrypsin-like elastase family member 2A	13252	21514.3	21601.5	17055.7	19657.5	11676.3	18104.4	11323.5	234991	35096.6	14098.9	11119.7	66852.4	16867.2	14199.9	9575	545696	8836.94	12864.3	14196.6
0	1.18152	50151.6	P05213	Tuba1b	Tubulin alpha-1B chain	8240443	7684428	7.62712e+06	7359627	7.63796e+06	6888843	7.34602e+06	7172861	11510263	12122278	14079214	12851548	9624351	8961504	8.28632e+06	8377810	7.04502e+06	7541186	7.25024e+06	8.12792e+06
0	1.14082	49959.5	P05214	Tuba3b	Tubulin alpha-3 chain	2.00209e+06	1.94881e+06	2.02211e+06	1.72363e+06	2.28389e+06	2.04844e+06	1.82698e+06	1.96537e+06	3.1626e+06	3.25524e+06	3.89906e+06	3.53409e+06	2.64208e+06	3.02678e+06	1.75491e+06	2311443	1.86903e+06	1.87265e+06	1.85625e+06	1.89905e+06
0	1.13524	13770.3	P05366	Saa1	Serum amyloid A-1 protein	850523	2.59661e+06	176187	440382	35203.9	49786	21344.3	93225.2	55283.7	37177.3	21102.6	95680.1	20805.2	18988.7	48670	29127.3	19498.3	17290.2	15162.2	28026.4
0	1.13569	13622.2	P05367	Saa2	Serum amyloid A-2 protein	70473.2	328437	18133	35179.3	16601.7	11115.5	19044	16770	9672.95	14284.7	15311.2	20896.1	13891.5	16019.2	11174.2	9960.21	15291.9	14701.9	18236.1	8487.79
0	1.10658	127481	P05555	Itgam	Integrin alpha-M	16659.4	20835.3	17891.7	27772.7	16611.3	22010.4	16090.4	19643.6	133354	102236	125099	175589	23768.5	17456.1	23370.3	17185.6	25905	15891.7	10621.8	11756.1
0	1.20274	47538.1	P05784	Krt18	Keratin, type I cytoskeletal 18	16727901	11229145	17630828	16446975	7263696	9569141	16404277	16945194	21572012	29659302	91822344	112093040	20685192	13537291	29797732	30311008	11692020	9812466	19569022	21430526
0	1.20677	36498.5	P06151	Ldha	L-lactate dehydrogenase A chain	72961032	65087544	57401948	49873252	39620304	40915004	36139284	34887632	60192784	50632252	48556480	58522232	49839264	45684156	45384876	41745716	45949576	53996668	43998300	46012480
0	1.12374	12970.8	P06327	Gm5629	Ig heavy chain V region VH558 A1/A4	19503.7	47477.7	82699	72224.6	63470	37008.7	32057.1	44005.8	78583.7	83812.7	78321.8	92013.7	38816.3	61786.2	30011.3	30229.2	82819.4	65978.9	42925.8	128798
0	1.14442	12934.3	P06330		Ig heavy chain V region AC38 205.12	183291	193830	259351	325171	210731	106230	189214	124283	530161	492222	355038	545898	216028	160272	145448	261662	330699	214726	174958	603685
0	1.05842	87163.8	P06537	Nr3c1	Glucocorticoid receptor	33141	25023.1	31499	37631.2	37893	41746.7	30651.3	29741.8	36441.1	37674.9	28529.8	24754.4	30319.6	24671.5	30423.5	30415.3	24031.6	29498.8	28526.9	21575.1
0	0.833561	62002.3	P06683	C9	Complement component C9	58069.3	67371.2	30318.6	47626.2	33604.6	28120.5	55675.6	30843.3	10434.9	109017	23510.3	116202	42047.1	10133	11618.3	51051.3	31605.8	14542.4	18636.1	54012.2
0	1.10087	188878	P06684	C5	Complement C5	190606	179870	148908	251011	210645	193237	155454	210658	165330	142800	148811	163121	109131	94591.6	92769.1	108611	128905	160137	159328	183394
0	1.18883	45029	P06728	Apoa4	Apolipoprotein A-IV	23097816	24351908	15265425	1.44092e+06	793872	741260	698609	793933	1.90201e+06	1.31709e+06	1.82355e+06	1.61865e+06	529583	606782	455406	580704	530553	543782	475108	684569
0	1.17781	62766.9	P06745	Gpi	Glucose-6-phosphate isomerase	4.91137e+06	4570317	4957689	5255862	5.57931e+06	5797016	5229086	5257769	8718460	7113785	8501631	6692419	7.15244e+06	7.9875e+06	6989866	6.06682e+06	4.61343e+06	4.54499e+06	4.26896e+06	4.28301e+06
0	1.16995	37547.3	P06797	Ctsl	Procathepsin L	458300	576726	392377	155370	161398	123991	139585	173516	250071	306876	278304	294912	130173	144852	112258	122983	168681	178157	145505	200515
0	1.14312	144837	P06800	Ptprc	Receptor-type tyrosine-protein phosphatase C	28181.3	40050.8	36333	21823.8	18874.2	20339.9	24804.7	17551.2	188069	206932	220817	253858	51095.1	31493.9	29124.1	19508.5	32026.5	36966.2	36683.5	40176.1
0	1.20361	63953.8	P06801	Me1	NADP-dependent malic enzyme	11504453	10506496	13479872	13823828	9752394	11878777	8713537	9047347	7729331	5063974	8414446	6.42515e+06	15128690	21125814	15344076	13526371	9667034	12499939	7.93392e+06	7463454
0	1.15831	103176	P06802	Enpp1	Ectonucleotide pyrophosphatase/phosphodiesterase family member 1	66924.4	74535.5	64370.9	58384.9	59959	24362.6	59825.2	69757.7	79111.1	81265.2	82101.7	89662.7	57243.2	53092.4	65350.6	54376.3	84763.7	84687.1	79855.6	97312
0	1.14674	139138	P06909	Cfh	Complement factor H	1.2402e+06	1.63256e+06	908470	1.46415e+06	979376	821575	817799	927178	873165	919816	783743	938726	815541	596096	845970	730109	602133	745539	711296	716193
0	1.10437	11721.4	P07091	S100a4	Protein S100-A4	35145.7	33942.7	23732.8	16709.7	18170.7	18326.2	17899.3	24994.9	352050	460503	392228	462902	93150.8	50218.4	17763.1	27658	29364.2	12356.2	24012	22647.8
0	1.18558	26203.5	P07146	Prss2	Anionic trypsin-2	20690.6	46442.6	14931.9	21762.1	19436.9	17339.5	38784.5	20265.3	715949	54452.5	26248.6	19455.7	27101.8	13491.7	15322.3	12146.4	205402	14836.3	15515.9	23810.4
0	1.17727	15775.9	P07309	Ttr	Transthyretin	4657296	4.42095e+06	3.95338e+06	3830842	6274113	6112530	5.55191e+06	5383719	6241449	5951206	6405855	6070290	6185253	6.02289e+06	6525922	4694191	7391725	6.94531e+06	7281239	6.05334e+06
0	1.08242	43045	P07310	Ckm	Creatine kinase M-type	74499.1	158385	39433.1	61256.1	91364	51389.6	50555.1	50598.8	41597.3	25400.7	42194.6	53043.4	39180.2	37251	37607	60776.5	563764	100548	31769.9	73877.4
0	1.16432	38676.2	P07356	Anxa2	Annexin A2	795634	545197	546479	466354	513163	659100	529198	628415	2.74431e+06	3.17742e+06	3.4246e+06	2769940	1.23117e+06	878245	694262	700944	838499	461867	698810	511267
0	1.14825	23843.4	P07361	Orm2	Alpha-1-acid glycoprotein 2	531388	1.45291e+06	219773	390941	151368	117774	96140	140639	352919	449272	376351	500019	239549	219250	238907	169878	117654	150390	101555	98238.2
0	1.21409	68692.5	P07724	Alb	Albumin	114038976	116296432	88864752	96882200	96803936	73278792	65077160	83171944	147457200	157301088	127326376	128876568	79140824	75908904	60970464	68978904	83242440	70619976	78214984	103886184
0	1.11269	90210.2	P07742	Rrm1	Ribonucleoside-diphosphate reductase large subunit	27687.2	32144.2	25338.5	36969.6	29529.7	29153.2	37034.3	32041.8	58688.8	32034.4	42808.2	42837.7	25549.4	27419.4	28508.5	23641.1	14658.7	28685.1	21895.7	34392.6
0	1.1938	46002.6	P07758	Serpina1a	Alpha-1-antitrypsin 1-1	2319139	2.6714e+06	2100272	2.65045e+06	2442508	2.08556e+06	1.992e+06	2.06111e+06	1.11514e+06	1.22149e+06	971343	1.02869e+06	1.20359e+06	938034	882120	1.19601e+06	1.22177e+06	1.27975e+06	1.41938e+06	1.40105e+06
0	1.21529	46879.9	P07759	Serpina3k	Serine protease inhibitor A3K	2.67931e+06	3.20905e+06	2.10201e+06	1.99344e+06	2.29849e+06	2081568	1.80567e+06	1.72374e+06	804429	993763	788009	1.03632e+06	1.01309e+06	430842	910060	1.11015e+06	965182	1.03639e+06	1.15851e+06	1.17424e+06
0	1.17694	84787.9	P07901	Hsp90aa1	Heat shock protein HSP 90-alpha	5.61617e+06	5407742	5.24968e+06	5.62014e+06	7057856	6.56201e+06	5.43103e+06	5.97177e+06	6.15876e+06	5.22626e+06	7161152	5574299	7433693	6.53128e+06	6.28431e+06	6.44696e+06	5713398	5218533	5222502	5.09441e+06
0	1.17102	71982.4	P08003	Pdia4	Protein disulfide-isomerase A4	2.24013e+06	2.31622e+06	2.01047e+06	3.05135e+06	3.37575e+06	3418108	3.06775e+06	3.67983e+06	3050128	2.86464e+06	3.17178e+06	3551698	3.07427e+06	2.39007e+06	2.73997e+06	2.43816e+06	2.94027e+06	3.20787e+06	2866140	2.93774e+06
0	1.17447	19723.9	P08030	Aprt	Adenine phosphoribosyltransferase	497126	474324	482110	379799	411722	470125	532646	516410	891854	1.02526e+06	1.06673e+06	1.05212e+06	751390	599949	544890	620807	319871	288235	292637	342890
0	1.09608	279865	P08032	Spta1	Spectrin alpha chain, erythrocytic 1	354430	232418	321572	181849	149473	118418	97271.4	130437	157770	180194	95223.6	138461	78588.2	98272.7	72935.7	82679.2	108400	79566.4	71483.5	187316
0	1.17011	77837.8	P08071	Ltf	Lactotransferrin	1801150	7.41449e+06	1.7648e+06	3.83991e+06	1303602	1.26943e+06	1.39516e+06	7.06157e+06	15833728	14462331	15932478	25390988	3.1455e+06	1593843	1.0139e+06	1.35061e+06	1.40995e+06	1724401	922739	1.30779e+06
0	1.11633	36695.4	P08101	Fcgr2	Low affinity immunoglobulin gamma Fc region receptor II	337160	341839	286331	239404	186242	160548	144150	119323	512005	540824	458221	588410	207167	206736	197099	225578	355163	331902	243824	388854
0	1.18432	92475.8	P08113	Hsp90b1	Endoplasmin	9925900	10898101	8611715	11519986	12944557	12311449	10865818	12889089	12368815	11375427	13027935	13323709	12055676	9838841	11102968	10009023	11412066	12284899	10993794	11352495
0	1.13267	11186	P08207	S100a10	Protein S100-A10	77186.4	67624.8	64925.9	52481.9	69372.3	64563.8	73506	75765	185528	226344	391768	381489	117595	96140.2	51820.9	56314.8	142268	77594.3	85510.6	84335.5
0	1.1841	35866.6	P08226	Apoe	Apolipoprotein E	16161063	15796950	14720315	12128685	10243255	8733095	8270582	8558163	19651744	18964430	19493412	21508508	14364905	11234997	11584866	11443344	11724833	12168133	11375874	11243759
0	1.19745	15942.7	P08228	Sod1	Superoxide dismutase [Cu-Zn]	36500200	32104224	32200192	36866652	37489624	29708830	32575642	41579284	39878496	30929228	33820308	73797576	68618952	56389912	26624828	21054554	103380280	120249976	54816188	92997296
0	1.18552	35611.4	P08249	Mdh2	Malate dehydrogenase, mitochondrial	23598626	25946018	22836422	19549310	21050008	19800976	20246498	19869202	24163976	25161600	24545492	24383446	24288014	25775498	23699016	22826752	23153320	21461880	22046168	23742618
0	1.01349	21199.1	P08556	Nras	GTPase NRas	57824.5	66615.3	60307.3	74026.6	68822.2	66506	91860.7	115150	53729	56894	55366.6	61441.6	51094.8	42290.8	31196.5	67227.8	45324.5	53665.7	40277.8	55389.9
0	1.14036	51523.7	P08607	C4bpa	C4b-binding protein	342325	420262	269976	179038	253332	368798	225336	269142	186071	229331	254391	182489	146519	114648	129037	129967	119498	196299	177985	181109
0	1.16621	40489	P08752	Gnai2	Guanine nucleotide-binding protein G(i) subunit alpha-2	846478	783092	675795	654948	656939	660167	685082	643635	1.46233e+06	1.43709e+06	1.59149e+06	1.49695e+06	907573	819033	765293	797693	767106	753200	733660	824290
0	1.14777	16689	P08905	Lyz2	Lysozyme C-2	81054.1	110899	55855.2	75202.6	45903.4	64490.6	24508.6	202348	508971	513776	818668	1.19465e+06	165685	74563.1	53757.6	59433.5	63763.4	88074.9	37927.8	67115.6
0	1.08838	8487.99	P09036	Spink1	Serine protease inhibitor Kazal-type 1	10871.4	832.418	24493.6	10543.7	21184.9	10448.4	22638.9	8561.78	48377.4	1402.17	2783.7	7490.65	7877.74	11824.6	10495.7	25821.4	15293.7	12636.2	6543.29	13163.8
0	1.10663	44852.9	P09041	Pgk2	Phosphoglycerate kinase 2	101965	89931.9	108278	126815	78480.1	58788.4	50310.9	36450	174286	202482	183436	139066	140894	124169	151110	125779	109855	160533	131107	123623
0	1.13911	88231.3	P09055	Itgb1	Integrin beta-1	777966	786364	775882	726738	695882	764210	696727	797583	1.13885e+06	1.08852e+06	1.19641e+06	1.19695e+06	753773	646279	614622	614121	751222	664005	755283	801628
0	1.19824	57058.5	P09103	P4hb	Protein disulfide-isomerase	24682456	23324430	19425010	25909132	23791258	24233748	23514036	24255848	29411962	25801564	33267718	34380160	29072624	29536314	31701906	27363580	25677458	27880644	23693594	23385684
0	1.09332	57514.2	P09242	Alpl	Alkaline phosphatase, tissue-nonspecific isozyme	19485.8	31052.9	16048.5	18684.4	6702.62	12402.1	7298.47	11625.7	91874.4	129587	131839	99726	24657.6	15092.8	14109.9	18172.5	4989.55	6981.96	4104.79	7908.54
0	1.16635	76723.1	P09405	Ncl	Nucleolin	2.1293e+06	2105536	2.07449e+06	1.82405e+06	1.53196e+06	1.6681e+06	1.94868e+06	2.05774e+06	2621404	2221160	2.5422e+06	2712049	1.45724e+06	1.2745e+06	1.58536e+06	1.39795e+06	1532259	1369094	1.61453e+06	1789748
0	1.18949	44550.5	P09411	Pgk1	Phosphoglycerate kinase 1	16209358	17108640	15228815	19342592	18007046	20474776	20003916	18397966	18534042	18863226	17744500	18011364	17041072	17135350	17150010	18710344	15308874	16604098	14436933	15141710
0	1.06242	150918	P09470	Ace	Angiotensin-converting enzyme	28507.5	34391.1	27889.2	22078.1	49702.5	51094.7	76084.7	9513.04	101861	111361	63576.7	109110	59730.5	53579.6	10965.2	13073.5	19487	11507.2	11766.9	23987.2
0	1.18116	21066.6	P09528	Fth1	Ferritin heavy chain	1.78376e+06	2.08778e+06	2.28199e+06	2.00887e+06	1.86919e+06	1.57335e+06	1.61825e+06	1.83853e+06	5.18227e+06	6.55385e+06	4919879	5670737	1.74856e+06	1.78536e+06	1.34511e+06	1.31607e+06	1.1246e+06	1.30261e+06	1.00098e+06	1.71044e+06
0	1.11662	9422.69	P09602	Hmgn2	Non-histone chromosomal protein HMG-17	26964.7	19027.5	79435.7	63926	23141.2	20957.4	69062.2	68159.5	30223.4	31633.5	98005.4	169684	20353.9	14682.7	19838.4	61565	24223.5	11016.2	39103.6	61385.6
0	1.18958	24602.9	P09671	Sod2	Superoxide dismutase [Mn], mitochondrial	8426483	9285921	8.37546e+06	7.98646e+06	7.73601e+06	8066557	8581653	8446185	6.08076e+06	6993036	5.14487e+06	5.88271e+06	6.10289e+06	6461060	6.8116e+06	6.86706e+06	7392214	6.14851e+06	7740616	6.69879e+06
0	1.12989	98255.9	P09803	Cdh1	Cadherin-1	101749	132621	123080	129690	126786	98345.5	129005	97636.5	371812	423665	568803	489377	192520	88491	175106	146989	135585	125818	144600	158470
0	1.17666	11309.1	P09813	Apoa2	Apolipoprotein A-II	13439153	8.21979e+06	11441076	9701353	8864359	6615396	5.2148e+06	8.25203e+06	2.48497e+06	1.86901e+06	2.20384e+06	2.30677e+06	6782012	6493918	3.71604e+06	3.09817e+06	6.85759e+06	5.24015e+06	4990481	4.16488e+06
0	1.08347	34798.4	P09925	Surf1	Surfeit locus protein 1	445253	440910	474507	397369	381719	397992	322128	323397	463452	431496	420378	493223	490719	415706	423117	387685	474826	489335	472422	454942
0	1.08761	23415.6	P0C0A3	Chmp6	Charged multivesicular body protein 6	66673.1	64043.2	65914.7	73812.3	68759.9	74578.3	101007	84902.4	97508.4	90972.8	88393.4	76777	88939.5	82898.6	78257.3	78131.8	55093.3	59353.4	57416.5	60288.7
0	1.14391	13552.73;13508.68	P0C0S6;Q3THW5	H2az1;H2az2	Histone H2A.Z;Histone H2A.V	36400.6	106078	1.99791e+06	1.74951e+06	24828.1	6639.46	1.52869e+06	1.45894e+06	13584.7	20755.8	1.21629e+06	1.34527e+06	8853.42	26380.6	1.43962e+06	1.45724e+06	36001.3	40334.1	1526905	1.62359e+06
0	1.15518	6954.1	P0DN34	Ndufb1	NADH dehydrogenase [ubiquinone] 1 beta subcomplex subunit 1	642067	702720	838730	663199	649259	836471	871233	615593	676946	754315	601137	643141	776226	795324	837687	778458	671702	777432	846311	798582
0	1.11518	46977.1	P0DOV1	Mnda	Interferon-activable protein 205-B	134417	183738	152185	104807	118895	136401	126697	67020.7	344822	453238	411647	411359	156806	148441	116996	156286	104732	100709	108608	140287
0	1.12946	69438.1	P0DOV2	Ifi204	Interferon-activable protein 204	95390	89345.2	92354.4	51970	60443.4	68334.3	65798.9	81030.6	137572	199614	202157	243230	73967.8	66495.9	77864.6	78410.2	80047.3	64746.9	61160.6	93103.4
0	1.18918	16837.58;16837.58;16837.58	P0DP26;P0DP27;P0DP28	Calm1;Calm2;Calm3	Calmodulin-1;Calmodulin-2;Calmodulin-3	5974203	6190679	5.4379e+06	5612055	4752383	5987948	5.9373e+06	6.21311e+06	8656428	7993848	7.57343e+06	8275165	4.95438e+06	4.33298e+06	4938555	5307942	4182303	3.81858e+06	4291374	4380033
0	1.1628	38734.3	P10107	Anxa1	Annexin A1	234649	426198	239699	291620	187777	224996	189528	371720	1.19434e+06	1.37037e+06	1.77288e+06	2.10255e+06	463398	309175	232317	241467	298460	193724	220254	230991
0	1.20199	50113.8	P10126	Eef1a1	Elongation factor 1-alpha 1	87054136	90120872	91163008	89178304	90264720	104731800	106391008	108173952	97770552	92380112	96286312	92126992	88188152	87403952	90101656	89468264	89058416	89255488	80122192	86044792
0	1.10784	136538	P10493	Nid1	Nidogen-1	18674.2	11649.5	22456.1	15057.5	9599.73	8681.41	12039	15894.3	82095.6	88494.2	125310	95881.8	31448.1	22851	20262.1	17328.9	22843.6	14487.3	30363.2	19857.5
0	1.17498	36023.5	P10518	Alad	Delta-aminolevulinic acid dehydratase	2.46149e+06	2.08979e+06	2075444	2883681	3.07023e+06	3.31608e+06	2.87115e+06	3.11768e+06	3.13054e+06	2.9372e+06	2754178	2.9545e+06	3.49703e+06	3.49438e+06	2975145	3.03529e+06	3.63227e+06	3.58368e+06	3.31264e+06	2.62507e+06
0	1.17922	37279.8	P10605	Ctsb	Cathepsin B	6.34283e+06	7.15012e+06	5954683	7.48533e+06	5.7582e+06	5.38694e+06	4.7703e+06	5622570	9502469	12689501	11205599	9840353	6693212	6.00767e+06	6.08951e+06	6.29176e+06	6510707	6789425	6.64781e+06	7.43966e+06
0	1.15058	46402.3	P10630	Eif4a2	Eukaryotic initiation factor 4A-II	874217	871776	826663	908238	806922	908680	820295	906892	403496	394525	443046	399105	670104	674771	622353	751932	751507	720580	765721	678626
0	1.19706	11675.4	P10639	Txn	Thioredoxin	18363732	16815670	15427559	16233370	15199933	17193660	13549799	14358450	22689246	24385738	25026308	22555908	17580272	15780257	15075204	18261070	13584334	13185689	13684234	12975937
0	1.20436	25542	P10648	Gsta2	Glutathione S-transferase A2	2.84788e+06	2.14058e+06	2580717	4191794	2.78217e+06	2.59874e+06	3.06401e+06	2.49574e+06	38788556	42834176	56994016	45903664	19586186	18734268	11867887	13231029	4292546	4214046	4.47094e+06	6.23304e+06
0	1.20144	25970	P10649	Gstm1	Glutathione S-transferase Mu 1	47664060	36578968	48634480	48577296	38150160	35661920	40781568	43666248	226059952	268001488	284753152	206162928	168102560	123731160	92300328	99843120	56782588	69678992	52401720	75295648
0	1.15556	33880.5	P10711	Tcea1	Transcription elongation factor A protein 1	445120	443490	417432	439330	401497	422423	402410	420660	429927	412763	415097	454652	405423	337671	324271	336677	383929	402882	369933	452772
0	1.05223	39203.9	P10810	Cd14	Monocyte differentiation antigen CD14	9838.93	123919	16666.9	8329.16	11507.5	8521.65	12297.4	10578.5	27296.8	20951.5	28792.1	42499	14502.6	13942.7	12949.7	6384.87	5376.89	13047.2	20771.7	10325
0	1.14971	23763.8	P10833	Rras	Ras-related protein R-Ras	471594	354992	360738	316428	355272	291185	365342	347202	562707	551802	531784	701986	419066	434516	387716	278048	350102	355786	331428	366836
0	1.16078	58336.6	P10852	Slc3a2	4F2 cell-surface antigen heavy chain	363008	371444	268786	223068	207012	188826	167265	196939	552476	587218	643116	599277	243607	206799	156770	188900	316955	209832	192834	245825
0	1.19862	13936.16;13936.16;13952.16;13920.16;13920.16;13906.13;13920.16;13992.27	P10853;P10854;Q64475;Q64478;Q64525;Q6ZWY9;Q8CGP1;Q8CGP2	H2bc15;H2bc14;H2bc3;H2bc9;Hist2h2bb;H2bc8;H2bc12;Hist1h2bp	Histone H2B type 1-F/J/L;Histone H2B type 1-M;Histone H2B type 1-B;Histone H2B type 1-H;Histone H2B type 2-B;Histone H2B type 1-C/E/G;Histone H2B type 1-K;Histone H2B type 1-P	3.33959e+06	3649938	40020324	38036864	1.17452e+06	1.27506e+06	33986724	41188448	1776182	1.34559e+06	58607244	63500012	1.6531e+06	2.08911e+06	30847006	37593788	1.34015e+06	1.40205e+06	34945388	40050236
0	1.16863	20860.9	P10922	H1-0	Histone H1.0	989608	1.0907e+06	3955214	3.25913e+06	363312	483572	3.33099e+06	3.89679e+06	333481	433966	2.40521e+06	2.99819e+06	281062	383120	1952181	2.00289e+06	481550	537095	2.86758e+06	3.14794e+06
0	1.14026	14427.4	P11031	Sub1	Activated RNA polymerase II transcriptional coactivator p15	239470	307198	415632	370281	288830	294178	416538	439902	317576	293235	324883	270412	162718	153553	186441	248146	142532	115188	164547	171929
0	1.11067	113100	P11103	Parp1	Poly [ADP-ribose] polymerase 1	75941	70424.9	71534.9	68598.1	58159.3	61470	70451.2	85896.5	153123	131195	153568	174729	84618	72156.8	106691	90675.5	103415	94562.9	90327.2	121638
0	1.12934	81181.7	P11247	Mpo	Myeloperoxidase	110438	410257	109154	134857	106658	70136.4	99556.7	213512	946953	923161	835975	1.25888e+06	161873	87155.6	41309.6	48392.7	63819.4	102116	71514.2	50207.9
0	1.19059	272538	P11276	Fn1	Fibronectin	984856	1.20768e+06	1.19862e+06	1.15094e+06	611843	767424	983039	1.23152e+06	1790587	1.67043e+06	2914600	2293749	844922	698584	1.25929e+06	1.27515e+06	512873	611237	814331	833022
0	1.19664	22329.3	P11352	Gpx1	Glutathione peroxidase 1	23024010	22469732	20826556	23961548	25352170	22879832	21495948	20373874	25246436	28793450	21508208	25128304	25304972	22261790	20673164	26678354	26353158	24099230	26322096	20717252
0	1.18761	43865.1	P11438	Lamp1	Lysosome-associated membrane glycoprotein 1	725290	906427	532695	456067	447411	490925	416971	468175	886881	1.10979e+06	1.1665e+06	939294	510783	512811	580610	552494	425000	370609	517494	515499
0	1.1979	83281.2	P11499	Hsp90ab1	Heat shock protein HSP 90-beta	31320268	28640546	27394898	32616104	35419580	34073776	30409686	33795232	29648464	25963460	31353142	28406936	35023608	33079832	29690630	34452988	29436298	29372316	27472722	27791112
0	1.18838	20663.5	P11589	Mup2	Major urinary protein 2	3240753	4.20216e+06	2.27283e+06	3.46075e+06	5373229	5436054	4.33473e+06	3.64524e+06	132868	25361	7012.79	8007.54	2.19573e+06	1.29237e+06	3.7105e+06	4.02791e+06	5.29617e+06	5366922	5276391	2.02953e+06
0	1.13179	38554.1	P11609	Cd1d1	Antigen-presenting glycoprotein CD1d1	348490	269050	358339	395283	322461	327594	309756	345511	165315	203684	178036	153071	237111	305428	309478	254689	242976	223378	242546	289164
0	1.12161	22875	P11672	Lcn2	Neutrophil gelatinase-associated lipocalin	359196	1.41288e+06	216396	212860	60345.7	77260.6	38687.1	289270	337778	322000	299500	467409	82913.1	45418.9	13808.2	38040.8	23580	37833.6	26615	17941.6
0	1.20402	54565.3	P11679	Krt8	Keratin, type II cytoskeletal 8	30911218	20003300	29313114	28987240	12479651	17123854	27753554	28870432	45931596	61326184	201075328	226524384	38051588	24611158	52283952	56098396	19248544	16601725	33618580	36579720
0	1.04485	50327.2	P11680	Cfp	Properdin	56531.1	55832	34892.6	40111.6	42338.7	33710.8	29448.9	48456.1	50712.6	64346.7	35988.9	53087	20975.7	14921.2	24718.4	23425.3	24687.2	19104.8	34994.8	45451.9
0	1.1206	115043	P11688	Itga5	Integrin alpha-5	358687	378751	396325	318328	352201	299800	288735	256762	659807	582363	708054	626270	434046	425803	322433	351841	430101	416809	395931	462276
0	1.15736	56950	P11714	Cyp2d9	Cytochrome P450 2D9	1.43128e+06	1.27954e+06	1.63954e+06	1524434	2.31226e+06	2.83051e+06	3.26675e+06	2.33286e+06	1.5615e+06	1.27941e+06	1.66969e+06	1.91958e+06	2486645	1587007	2228924	2206062	2.9508e+06	2.809e+06	3644914	1.97875e+06
0	1.20269	39764.9	P11725	Otc	Ornithine transcarbamylase, mitochondrial	28065900	31004110	27577136	26177448	27165820	26377194	27969152	26307196	21807158	23273744	17103056	19893776	24236836	23396014	21177140	22906222	34602264	30499764	33006574	33659648
0	1.15088	85025.8	P11835	Itgb2	Integrin beta-2	203120	257698	200609	177376	157057	151437	186453	268325	1.18068e+06	1190784	1.47338e+06	1508682	278509	192932	170610	223438	222499	217063	133019	244098
0	1.09361	51990.4	P11859	Agt	Angiotensinogen	279050	280519	277536	149001	213469	157222	131977	149625	170186	147631	182692	202169	136339	165193	148521	126771	147094	153814	166111	184381
0	1.14505	34900.5	P11862	Gas2	Growth arrest-specific protein 2	117863	99216.1	139394	188624	173062	143218	157894	97384.1	234953	202025	366703	297478	342888	384791	294474	299537	247014	328124	196603	466918
0	1.08278	313167	P11881	Itpr1	Inositol 1,4,5-trisphosphate receptor type 1	53011	52188.8	50808.7	43547.5	34847.8	37098	29779.2	38692.8	51793.7	47974.1	51679	58706.2	45145.5	37102.7	41909.4	38512.8	59165.1	56473.3	57106.8	57647.4
0	1.15504	40320.1	P11930	Nudt19	Acyl-coenzyme A diphosphatase NUDT19	690498	679150	752219	632806	506741	396477	600673	526925	1.0096e+06	1.09375e+06	1.13115e+06	1.15303e+06	731506	857629	663307	562286	591205	568251	672612	779816
0	1.162	60448.6	P11983	Tcp1	T-complex protein 1 subunit alpha	1571311	1533110	1.50806e+06	1.75428e+06	1.9445e+06	1.8937e+06	1.7563e+06	1.86802e+06	1.93298e+06	1.66274e+06	2.02196e+06	1.87507e+06	2.0826e+06	2.04626e+06	1.70525e+06	1.80092e+06	1.81219e+06	1.84809e+06	1.74732e+06	1.62727e+06
0	1.14692	74195.3	P12265	Gusb	Beta-glucuronidase	1.00581e+06	1.06184e+06	829117	846276	703762	650186	635012	562444	868325	1.04135e+06	990466	854329	732555	560450	542500	601066	677002	717681	663266	684622
0	1.15082	45389.1	P12367	Prkar2a	cAMP-dependent protein kinase type II-alpha regulatory subunit	475264	470610	419346	380474	427735	416170	395354	435931	369231	390928	382388	426414	445798	411344	400886	367293	415713	424096	379255	458624
0	1.1505	85359.8	P12382	Pfkl	ATP-dependent 6-phosphofructokinase, liver type	367827	310285	367724	433452	492226	427368	441786	421212	641694	583143	578244	506818	662890	576496	544426	554868	556344	541730	529894	558026
0	1.18435	14245.5	P12710	Fabp1	Fatty acid-binding protein, liver	60279928	52134108	46462492	41550936	53412168	48338296	37104192	48019092	39834520	25913638	23297422	42730808	78932272	53032444	46308444	38510196	100941640	106235424	74653520	81986136
0	1.17476	16101.5	P12787	Cox5a	Cytochrome c oxidase subunit 5A, mitochondrial	7258251	7262783	6532965	6453412	7.58058e+06	8.02042e+06	6.55297e+06	6481953	5621688	5.22231e+06	4.69857e+06	5109931	6345319	6454833	6.37008e+06	5.767e+06	5.5178e+06	5926966	5764252	6356531
0	1.11642	55740.8	P12790	Cyp2b9	Cytochrome P450 2B9	148839	156773	146451	174045	161073	144700	198484	248755	147816	81972.2	109567	146281	147360	233856	160398	108135	102207	117258	137288	131050
0	1.17876	56743.6	P12791	Cyp2b10	Cytochrome P450 2B10	278020	957064	793388	195282	182292	162541	167278	142516	4.39872e+06	4565699	5.49902e+06	3.25178e+06	944206	1.24242e+06	832391	1.46708e+06	103376	100722	93506	112132
0	1.13983	21867.5	P12815	Pdcd6	Programmed cell death protein 6	412816	358376	378348	382531	317698	382191	422369	355944	465839	440974	538387	555433	408330	385896	408258	433448	441574	440328	435177	448487
0	1.17128	29976.6	P12970	Rpl7a	60S ribosomal protein L7a	8.02989e+06	6942837	7.27439e+06	6763027	7.14792e+06	6885378	6.30026e+06	6.49045e+06	8.07409e+06	7394287	8578272	8421566	7408889	6568901	7.06586e+06	6288201	7668699	7772015	7155607	7.4e+06
0	1.1529	85941.6	P13020	Gsn	Gelsolin	533042	595475	502128	877582	893379	725029	857242	1.11379e+06	1.0539e+06	1.21414e+06	1.54186e+06	1.80727e+06	672804	598059	528361	639402	553698	451007	709519	860163
0	1.13673	52292.5	P13439	Umps	Uridine 5'-monophosphate synthase	377392	383269	347233	338804	426037	377000	345632	345367	471714	446682	579253	431452	546977	555850	435597	492610	347021	357266	330739	362625
0	1.16921	41046.4	P13516	Scd1	Acyl-CoA desaturase 1	47823.6	68487.1	73564.6	73768.6	114715	299583	244616	133456	411573	277438	726591	343555	769648	1519900	1.31386e+06	915350	402947	633374	385700	248701
0	1.11731	58844.2	P13597	Icam1	Intercellular adhesion molecule 1	319563	303496	189226	191247	188931	164369	116101	189541	371873	390096	388753	489770	203572	130073	152395	116120	132478	132379	111474	168378
0	1.14934	28330.5	P13634	Ca1	Carbonic anhydrase 1	1.89655e+06	1.41622e+06	1.77057e+06	1.06784e+06	999115	916024	594415	979007	1363266	1.38684e+06	1.00384e+06	1.14737e+06	645920	668798	521669	614113	866613	356509	720547	1.19565e+06
0	1.19091	37572.7	P13707	Gpd1	Glycerol-3-phosphate dehydrogenase [NAD(+)], cytoplasmic	16829738	13515446	14732994	15557421	14740695	17022496	14421585	13831711	12890095	12696558	14568207	15105194	15139260	14481446	14356547	13475698	17999318	19263234	16008889	12794697
0	1.07492	183189	P13864	Dnmt1	DNA (cytosine-5)-methyltransferase 1	380556	443909	65826.4	312139	320590	293987	43163.2	409031	339394	166170	476495	341994	290974	276010	31647.8	44090.5	279964	417042	183458	106718
0	1.15566	10050.6	P14069	S100a6	Protein S100-A6	303857	171604	122735	165752	137096	127992	145146	186181	668856	657639	519933	611463	277469	176512	118244	174707	164708	57040	130668	102348
0	1.16227	35194.6	P14094	Atp1b1	Sodium/potassium-transporting ATPase subunit beta-1	2.17652e+06	1.96625e+06	2405712	2.57916e+06	2.45364e+06	2.54066e+06	2.17984e+06	2.14115e+06	2.19117e+06	1.9257e+06	2.01789e+06	2.15551e+06	1947238	1.75885e+06	1.86796e+06	1.95068e+06	2.19391e+06	2.11429e+06	2.32713e+06	2.78369e+06
0	1.12178	26717.3	P14106	C1qb	Complement C1q subcomponent subunit B	169401	81294	61071.2	76013.9	71053.8	119860	95630.6	89051.3	225985	310236	302724	257248	109952	70949	86610.3	109525	53280.3	75089.4	71707.2	101669
0	1.18323	16605.5	P14115	Rpl27a	60S ribosomal protein L27a	3085579	2.36416e+06	4.66618e+06	4.11091e+06	6066137	2.63678e+06	2.94067e+06	8415553	10769315	8.2267e+06	11993989	15160880	13694802	10741262	6.55913e+06	2.93565e+06	12707944	14233563	9975129	13086986
0	1.17597	16445.3	P14131	Rps16	40S ribosomal protein S16	2.83571e+06	2.48984e+06	2.1034e+06	2172440	2.25332e+06	2560393	2535708	1.45079e+06	2.8149e+06	2.71191e+06	3.35299e+06	3.04611e+06	2.22199e+06	2.05851e+06	2154571	2.26714e+06	2.39698e+06	2.43148e+06	2.29136e+06	1.96556e+06
0	1.17504	31419.6	P14148	Rpl7	60S ribosomal protein L7	5.63174e+06	5420918	5399144	5.26359e+06	5.2002e+06	5.52022e+06	5189149	5773583	6319692	5690947	6.49519e+06	6.43806e+06	5.59466e+06	4.80801e+06	5.00468e+06	4935701	5.3747e+06	5732391	4993973	5.15301e+06
0	1.20026	36511.2	P14152	Mdh1	Malate dehydrogenase, cytoplasmic	23180972	21288412	21415942	26186172	29494110	26763418	25761726	25619442	24539534	24970484	20147044	21923488	25833030	26044252	23544256	25720618	27566032	27271802	25899110	28868270
0	1.17026	32838.1	P14206	Rpsa	40S ribosomal protein SA	17329342	18028566	15574562	14203911	14699764	15416220	14140590	16294908	15236803	14346015	17409456	15533617	13557294	12420232	13063127	12832791	14405042	15334955	12754138	12861237
0	1.18524	47994.5	P14211	Calr	Calreticulin	15646622	16322452	13491308	18392148	18489286	19185024	17673162	18259686	16859622	16923590	18304854	19785084	16782126	13333030	16418213	14237807	17301034	18568470	16415248	17331842
0	1.15541	57106.9	P14246	Slc2a2	Solute carrier family 2, facilitated glucose transporter member 2	1.06983e+06	813425	1.29119e+06	1.33097e+06	1.69879e+06	1.50608e+06	1.53967e+06	1.51331e+06	1649978	1.92625e+06	1.40346e+06	1.52201e+06	2.01321e+06	1.77118e+06	1.7062e+06	1.67188e+06	1.7592e+06	1571249	2.10165e+06	1.23867e+06
0	1.11327	30128.2	P14483	H2-Ab1	H-2 class II histocompatibility antigen, A beta chain	96831.9	28357.8	45577.3	16930.7	28890.1	50920.5	19182.2	55181.7	293918	239698	346616	326912	140829	102318	38038.5	68529.5	86542.1	66090.6	52936.1	96518.2
0	1.18103	55720.7	P14576	Srp54	Signal recognition particle 54 kDa protein	1.01873e+06	1.04414e+06	1.01962e+06	944711	835748	919018	789877	707507	668239	667742	703214	703917	695668	691510	702700	726275	808090	770079	694003	751225
0	1.10533	23013.8	P14602	Hspb1	Heat shock protein beta-1	109834	90009	134340	115862	48925.6	112395	110779	121154	87500.3	127012	175581	213103	108473	50376.4	93149.7	111699	131525	72479.4	103230	201257
0	1.15786	60718.2	P14685	Psmd3	26S proteasome non-ATPase regulatory subunit 3	729759	714407	760056	799385	749327	757188	686443	638094	864801	849907	934520	877338	861575	926451	809921	813487	758439	809187	713061	696425
0	1.14846	66785.6	P14733	Lmnb1	Lamin-B1	603750	703410	1093384	1.00025e+06	532671	563320	975131	1.03189e+06	1.11961e+06	973918	1.68535e+06	1.92993e+06	554997	531082	792984	831696	647171	538017	951036	1.12249e+06
0	1.19324	75885.3	P14824	Anxa6	Annexin A6	2.22036e+06	1.53265e+06	2.56189e+06	2.89395e+06	2.75267e+06	2.62588e+06	2863179	2790443	4.1191e+06	5.30465e+06	5.87119e+06	5931584	4.02779e+06	3500654	3.93311e+06	3.99692e+06	3.19793e+06	3233066	3.44873e+06	3.39793e+06
0	1.02398	25359.9	P14847	Crp	C-reactive protein	48048.3	56151.3	50904.2	147206	53232.6	87635.2	69208.6	118259	62906.1	69344.8	33745.6	75184	30115.1	51991.3	54745.7	67327.5	42190.5	58037.6	41017.9	57043.5
0	1.18104	34216.4	P14869	Rplp0	60S acidic ribosomal protein P0	6.24425e+06	5.86355e+06	6.08802e+06	5.66087e+06	5.78316e+06	5.86568e+06	5.72542e+06	6304633	6989202	6809620	7507603	7.05029e+06	6.31996e+06	5829188	5591199	5467268	6351833	6368826	6.18044e+06	5.99374e+06
0	1.13969	32928.7	P14901	Hmox1	Heme oxygenase 1	633171	486094	433049	299137	190776	160372	208637	256685	2.42226e+06	2723811	2.37503e+06	2.28153e+06	237259	209259	206363	174876	149931	203252	130873	343299
0	1.1938	42119.6	P15105	Glul	Glutamine synthetase	5388378	4802576	6.91039e+06	10338208	11316182	11519049	11494590	12695647	5726122	5.25766e+06	4.32727e+06	7291294	13263529	13113714	10404009	10862867	13166006	13737613	13782519	6.87622e+06
0	1.1164	99796.4	P15116	Cdh2	Cadherin-2	517355	470268	631792	525679	399495	464489	633975	679232	342956	346170	491188	559088	262388	262615	422958	490707	413999	424530	559205	536068
0	1.09818	155610	P15208	Insr	Insulin receptor	377208	382249	377836	219890	253013	236976	181765	133340	244348	217389	228164	214461	211698	191822	225744	203568	224443	214019	258735	284588
0	1.1333	29978.2	P15327	Bpgm	Bisphosphoglycerate mutase	1092739	820295	894860	504396	395888	340247	267698	288621	377091	425570	263487	305662	200905	209350	142062	194093	232505	168302	155390	355373
0	1.13178	85617.1	P15379	Cd44	CD44 antigen	272055	211657	193721	121384	121187	117613	101814	209907	659866	823118	992344	801394	255372	167668	186333	133952	126317	83579.5	68294.8	138882
0	1.12691	56781.8	P15392	Cyp2a4	Cytochrome P450 2A4	1.22059e+06	1.44977e+06	1.56066e+06	1.12807e+06	272963	611449	812425	689384	1.31704e+06	642308	1949896	1.09668e+06	1.16709e+06	1.54343e+06	1.41075e+06	919716	348585	165701	663643	1248988
0	1.12836	245250	P15508	Sptb	Spectrin beta chain, erythrocytic	682312	474498	627864	385031	304992	259743	192589	285120	294960	375042	200310	301785	158389	178012	142113	190045	202340	154789	151686	362777
0	1.1633	17207.8	P15532	Nme1	Nucleoside diphosphate kinase A	859501	650274	663376	805287	1.10534e+06	873079	600812	907810	1.78124e+06	1.62416e+06	1753219	1.49104e+06	1494527	1.30974e+06	1.2611e+06	821660	1.28329e+06	1213321	1.27733e+06	1.15795e+06
0	1.18774	25716.7	P15626	Gstm2	Glutathione S-transferase Mu 2	19055932	17020914	19321736	22087856	20729414	16910354	18267414	19940246	87580384	97805600	104930976	74203384	80680016	78341656	59105292	71769232	21445108	23338804	22254084	22242802
0	1.17641	21266.7	P15864	H1-2	Histone H1.2	462669	667672	3.47286e+06	1.6303e+06	361611	307321	1887573	2.48461e+06	855306	690290	3.99711e+06	5.84917e+06	434111	363435	1.85188e+06	1.0681e+06	337541	273077	1.73964e+06	2.43466e+06
0	1.20547	29366.3	P16015	Ca3	Carbonic anhydrase 3	105645848	84615496	88223320	78307376	121457456	138369408	125622672	128164352	17079770	14763412	10761144	19255134	59175308	50254360	44655576	64847964	196588000	83679656	171729280	101809408
0	1.17122	14865.9	P16045	Lgals1	Galectin-1	855752	817733	727189	855408	658417	1.00291e+06	840109	841972	3.02112e+06	2845978	3.6449e+06	3.5488e+06	2.2705e+06	2.27921e+06	1816296	2.04339e+06	1.43353e+06	1.06387e+06	1154811	835150
0	0.954169	153549	P16056	Met	Hepatocyte growth factor receptor	29936.9	22361.5	31068	37011.3	40255.6	26203.2	24418.6	23046.2	15264.5	13644.4	9062.31	13431.9	12104.5	16737.6	22634.4	5993.78	33247	15395	20332.9	19208.4
0	1.14961	27514.9	P16110	Lgals3	Galectin-3	76828	68205.4	50227.2	39001.2	34159.5	34097.4	29500.8	47809.5	626574	1.0019e+06	1.06361e+06	874182	171079	94630.1	89522.4	111177	40785	40461	36614	65740.8
0	1.03026	36572.3	P16125	Ldhb	L-lactate dehydrogenase B chain	98097.3	67517.6	25751.2	44798.8	127841	106922	82039.2	104312	147993	142487	141753	160825	114771	77238.6	64943.7	81521.4	173802	114722	111767	103867
0	1.08989	12509.6	P16254	Srp14	Signal recognition particle 14 kDa protein	157768	174145	141188	168982	158617	169942	167961	191297	141325	145908	157526	147662	135611	125696	152147	141351	134792	142950	133539	135909
0	1.08363	52977.8	P16294	F9	Coagulation factor IX	83878.1	92998.3	88419.4	73332.5	77154.5	91428.6	41360.7	57086	61646.8	63833.9	51988.9	65503.7	41974.2	57249.3	46392.4	44991.2	42194.7	49369.1	39892.8	65525.9
0	0.996992	49746.9	P16301	Lcat	Phosphatidylcholine-sterol acyltransferase	367288	402519	338972	417610	270430	374966	328271	324093	278314	326745	242504	265798	216379	220465	226946	230867	260461	267637	210679	344155
0	1.13724	47123.3	P16330	Cnp	2',3'-cyclic-nucleotide 3'-phosphodiesterase	68887.6	53186.6	55284.4	49525.7	57256.3	55253.7	61799.3	54594.1	123848	121688	124720	136371	113543	86919.9	111507	73394	77301.3	76443	80184.6	67488.5
0	1.18463	51899.9	P16331	Pah	Phenylalanine-4-hydroxylase	9438022	10055193	12521592	10127643	10824503	11216218	10606670	9236150	10379071	12604136	9524902	9171369	11597474	10904385	9767526	12046005	10552262	11770490	10780097	16458707
0	1.17277	82844.1	P16332	Mmut	Methylmalonyl-CoA mutase, mitochondrial	1.44363e+06	1.62832e+06	1.56371e+06	1.28433e+06	1.39048e+06	1.42671e+06	1.51652e+06	1.42827e+06	1.43093e+06	1.56446e+06	1.24079e+06	1.46666e+06	1.29907e+06	1.45806e+06	1.38615e+06	1.23053e+06	1.64386e+06	1.62279e+06	1.67208e+06	1.9951e+06
0	1.14585	107956	P16406	Enpep	Glutamyl aminopeptidase	1.4394e+06	1.12257e+06	1714625	1.91923e+06	1.67861e+06	1.39105e+06	1779209	1.59766e+06	1.37834e+06	1.3261e+06	1.33058e+06	1144089	1.63555e+06	2.05902e+06	2.17132e+06	1.76651e+06	1.43407e+06	1.76216e+06	1.55082e+06	1.49249e+06
0	1.21001	46584.5	P16460	Ass1	Argininosuccinate synthase	142320448	121576864	140040816	174274640	154208784	130792712	153482784	136395872	213165872	212570752	168775904	177232064	201756896	249894416	176122864	209664256	163711552	189572688	167343488	279060800
0	1.18375	284597	P16546	Sptan1	Spectrin alpha chain, non-erythrocytic 1	3.17391e+06	3.16635e+06	3.49428e+06	3.26784e+06	2181330	2.25669e+06	3.55894e+06	3.19837e+06	2.75198e+06	2887503	4452748	5455170	1.97716e+06	1.98327e+06	4.11455e+06	3.90299e+06	2.07993e+06	1.69682e+06	3.38028e+06	2.98502e+06
0	1.16662	53844.1	P16675	Ctsa	Lysosomal protective protein	1.16624e+06	1.25206e+06	1.12513e+06	1.14841e+06	837515	931070	882420	920485	1.15915e+06	1.55924e+06	1.32512e+06	1332289	726998	576846	684431	689026	1.06325e+06	1.04371e+06	1.08035e+06	1.10591e+06
0	1.21529	35810	P16858	Gapdh	Glyceraldehyde-3-phosphate dehydrogenase	94261704	83450880	66171240	80806072	76620288	73609520	64605240	64435620	127230304	118092472	120950432	106887016	107635952	112870984	83108136	81243936	75464176	84303712	69858960	77580696
0	1.17661	45681.1	P17047	Lamp2	Lysosome-associated membrane glycoprotein 2	2.40601e+06	2.9408e+06	2445262	2.10182e+06	2154398	2207084	1.86866e+06	2.50357e+06	2.50804e+06	2.96242e+06	2.91836e+06	2.66356e+06	1959622	2045796	2.04148e+06	1.90086e+06	1.80131e+06	1.89746e+06	1.83149e+06	1.94713e+06
0	1.13645	11614	P17095	Hmga1	High mobility group protein HMG-I/HMG-Y	288998	474982	625309	657114	198498	192174	498936	441528	309450	464584	923628	1.29583e+06	84355.4	118395	514489	365319	88012.7	58696.5	404750	495370
0	1.20399	69641.7	P17156	Hspa2	Heat shock-related 70 kDa protein 2	9960655	9637581	8867842	8875256	9293203	9508135	9042459	9859530	8742052	8.12108e+06	9496370	8852102	8945603	8.12429e+06	7994038	8576028	7043155	6777042	7.17914e+06	7.34254e+06
0	1.1903	47140.8	P17182	Eno1	Alpha-enolase	21966492	18479460	18143200	19072386	21648450	16415511	14541774	18164562	34365244	30675896	34034452	33005304	34550616	32950210	23573674	20352826	25975250	27567846	21986280	24227348
0	1.18946	59321.6	P17225	Ptbp1	Polypyrimidine tract-binding protein 1	2.33212e+06	2.35024e+06	2.20902e+06	2.13793e+06	1.84994e+06	1.92407e+06	2.06673e+06	1972973	2.42038e+06	2.36245e+06	2.61894e+06	2.82037e+06	1.90369e+06	1.64113e+06	1.82246e+06	1.86416e+06	1.82538e+06	1.88291e+06	1.92577e+06	2030418
0	1.1568	107664	P17426	Ap2a1	AP-2 complex subunit alpha-1	837881	859370	885105	763796	717028	793358	733808	724445	949420	991758	1.1353e+06	1106013	771348	689584	700956	742228	686181	742092	788692	782916
0	1.16745	104017	P17427	Ap2a2	AP-2 complex subunit alpha-2	1.31682e+06	1.2795e+06	1.26782e+06	1.26722e+06	1188052	1.15337e+06	1.17841e+06	1.12358e+06	1.27396e+06	1.34658e+06	1.50287e+06	1.44019e+06	1.12828e+06	1.02996e+06	1.10483e+06	1.20059e+06	1.13155e+06	1165655	1.23888e+06	1.14337e+06
0	1.1348	57621.9	P17439	Gba1	Lysosomal acid glucosylceramidase	282104	289006	250446	236432	203282	213110	191741	265119	125619	148830	100951	144003	101913	81856.1	80974.1	105531	214028	212056	207172	185975
0	1.17589	52514	P17563	Selenbp1	Methanethiol oxidase	3.24997e+06	3.3147e+06	3.50328e+06	3.58169e+06	4.37545e+06	3.7608e+06	3.74925e+06	3.80525e+06	7.04093e+06	7.49283e+06	7163385	7142926	7485777	7.48397e+06	2611606	4.49387e+06	4486570	5.2884e+06	3829693	4758516
0	1.18089	7332.62	P17665	Cox7c	Cytochrome c oxidase subunit 7C, mitochondrial	7732891	8587522	5731928	5.34004e+06	7.17687e+06	7.23877e+06	5.77219e+06	4.72838e+06	4345784	5275230	3997945	3.57e+06	5.09399e+06	5.65929e+06	6228686	8746231	4325962	4.71806e+06	6162694	5520386
0	1.05654	108303	P17710	Hk1	Hexokinase-1	253910	215856	219395	217274	171206	150418	146281	136783	526517	635550	560184	629869	409864	264766	320373	299109	265824	192529	221298	232192
0	1.21529	60856	P17717	Ugt2b17	UDP-glucuronosyltransferase 2B17	17233030	14953943	16533012	18842270	17069198	19588754	18005904	16746257	7526794	7786368	8725376	7966136	11371654	8655346	14016445	12498791	14154285	13911594	16232897	12442766
0	1.18892	17971.3	P17742	Ppia	Peptidyl-prolyl cis-trans isomerase A	30032310	28871444	29310036	27854358	30847506	30631264	28652570	28535392	41698796	39423076	44800668	44774388	31734580	30861618	26637308	31355402	28816042	30549138	27817594	31837454
0	1.19399	26712.6	P17751	Tpi1	Triosephosphate isomerase	20832876	17919248	19607568	19691782	19651350	18632888	19312470	19029808	28811064	27673490	27541080	27337886	27260166	25741924	23401226	22709078	22041534	23139842	19525142	23007208
0	0.993777	53984.6	P17809	Slc2a1	Solute carrier family 2, facilitated glucose transporter member 1	23836.8	16539.5	21897.3	25267.3	23671.3	26095.1	23086.3	17910.2	55110.2	53486.3	57665.3	62007.2	33568.8	23849.7	36563.9	29994.9	41540.3	44511.2	43998.7	42160.3
0	1.14682	70176.27;70079.15	P17879;Q61696	Hspa1b;Hspa1a	Heat shock 70 kDa protein 1B;Heat shock 70 kDa protein 1A	1718576	1.64981e+06	1.56335e+06	1.17397e+06	1.66991e+06	1.44518e+06	1.32506e+06	1.46595e+06	995740	977635	1.09067e+06	778222	2.20435e+06	1.21912e+06	1.40181e+06	1.57425e+06	1.31574e+06	1.06771e+06	1.36463e+06	814741
0	1.13367	28784.9	P17918	Pcna	Proliferating cell nuclear antigen	170614	119844	131755	213939	192251	194912	191711	227563	607169	363465	645553	438752	246317	256389	193235	185062	169083	173638	149489	169002
0	1.02131	93697.6	P18052	Ptpra	Receptor-type tyrosine-protein phosphatase alpha	4413.99	3988.21	3147.99	2421.58	4812.88	4771.53	3500.64	13477.3	9830.88	9165.15	7620.14	9824.62	6234.95	5336.02	5657.17	2126.77	6179.49	6348.75	6388.59	7714.54
0	1.17383	44953.8	P18242	Ctsd	Cathepsin D	6740890	6875491	6044631	5769128	5381693	5260280	4.41305e+06	5.61711e+06	11256807	14765940	13137562	13075467	5985044	5.76919e+06	5932411	5412773	5809209	6.50615e+06	5595437	7789590
0	1.09306	12514.9	P18419	Svs4	Seminal vesicle secretory protein 4	10183.4	16834.9	15718	315300	12748.8	12899	16784.9	10914.2	16954.4	15610.3	12106	13206.3	12566.4	9793.46	12841	13551	11924.5	12608.3	14187.1	13838.9
0	1.08157	12871.8	P18525		Ig heavy chain V region 5-84	16318.8	83321.3	72238.3	85157.3	36048.9	16920.6	35583.3	15798	53792	53556.7	69176.4	117251	29744.1	28782.5	9284.33	16561.5	31734.8	29121.1	26838.6	140890
0	1.12306	13094.9	P18531	Ighv3-6	Ig heavy chain V region 3-6	14852.4	19821.4	33034.5	37322.9	44682.6	12767.9	15706.1	52418.7	86728.4	47532.7	37637.9	67483.5	29763.2	40420.8	19069.9	22948.3	47151.3	27278.1	40386.5	79799.3
0	1.16481	42444.7	P18572	Bsg	Basigin	3615813	3.98583e+06	3924056	3.85074e+06	3273062	3765126	3673024	4500848	3109010	2.95435e+06	3.14062e+06	3.15942e+06	2.94019e+06	3.42242e+06	3365577	3266013	2169862	2.13575e+06	2.32616e+06	2298123
0	1.10493	71856.3	P18581	Slc7a2	Cationic amino acid transporter 2	1.39984e+06	1.7458e+06	1.72517e+06	192359	443712	368064	283564	251158	477382	271053	293728	229418	319531	431822	328085	410276	398081	403662	327183	1.0344e+06
0	1.09194	10152.4	P18608	Hmgn1	Non-histone chromosomal protein HMG-14	15214.4	19846.4	84609.3	68297.3	16426.6	10652.3	87710	150991	14754	26611.4	133648	146878	15563.7	14162.1	84338.8	67096.6	11340.1	13770.4	56400.3	89189.3
0	1.12213	83693.9	P18654	Rps6ka3	Ribosomal protein S6 kinase alpha-3	46050.7	38446.6	31035.7	38960.5	30785	28190.7	17757.3	19347.4	117519	118522	157997	142729	43273.5	21336.3	29940	29621.1	30956	15978.5	15020.2	24444.4
0	1.18788	18559.5	P18760	Cfl1	Cofilin-1	6367043	5981888	5656966	5966451	5.7878e+06	6.04909e+06	5.82569e+06	6535532	13373656	13374030	13691771	15263680	8.2197e+06	7.36136e+06	6.96666e+06	6.77367e+06	6.43205e+06	6854084	6022276	7.12485e+06
0	1.00756	32904.6	P18828	Sdc1	Syndecan-1	107750	159116	211097	145124	58214.6	139868	275355	166563	101276	126910	142156	71374.9	66593.6	28745.2	201632	213857	24090.3	59041.7	76821.8	140924
0	1.1974	44541.8	P19001	Krt19	Keratin, type I cytoskeletal 19	8989873	5320086	6.36302e+06	6.64054e+06	3.45853e+06	4.36199e+06	6611784	7955516	11441643	17861268	47769332	58966084	8831742	6.20187e+06	13316741	14946464	8688800	3946797	9154530	7.51273e+06
0	1.19581	272428	P19096	Fasn	Fatty acid synthase	3.93935e+06	4.47894e+06	4.48095e+06	5838569	6198360	7330850	6.38677e+06	6.87829e+06	11680460	6.29262e+06	12538343	5.93962e+06	16449078	29981286	17700846	16858472	6.89754e+06	8.31532e+06	6.09763e+06	4768717
0	1.20018	23609.2	P19157	Gstp1	Glutathione S-transferase P 1	233557184	168889984	162752480	133217160	183777568	204337040	157957952	163636768	170686752	176428592	158079936	164957632	175470288	94178704	101620104	93448816	288752352	279806976	240349504	252317088
0	1.1613	70268.7	P19221	F2	Prothrombin	1.314e+06	1.31719e+06	1.07276e+06	1.1235e+06	1.0849e+06	1.32014e+06	916806	1.16395e+06	1.26688e+06	1.25229e+06	1.06866e+06	1.01137e+06	1.35959e+06	1.05373e+06	1178846	1.24696e+06	800616	818116	873834	878887
0	1.18422	23464.2	P19253	Rpl13a	60S ribosomal protein L13a	4848455	5729325	7.22641e+06	6918732	7.08143e+06	7445985	6.71073e+06	6.73668e+06	8.19492e+06	7.40908e+06	9167990	8568635	7531350	6811420	6354866	6601104	7185516	7.41074e+06	6.98942e+06	6880436
0	1.15258	46533.6	P19324	Serpinh1	Serpin H1	130463	147543	133195	135378	160235	186593	166832	172908	705084	535027	955813	711170	419816	271618	306713	306550	135768	94977.4	135177	129764
0	1.19457	13812.9	P19536	Cox5b	Cytochrome c oxidase subunit 5B, mitochondrial	7174366	7312033	6653533	5.75238e+06	7475523	7515876	6.75516e+06	6.7317e+06	5881922	5.80082e+06	5.20601e+06	5941722	7.89656e+06	8275395	6.68415e+06	6054694	6078615	7578990	7100839	8.19848e+06
0	1.20531	25701.6	P19639	Gstm3	Glutathione S-transferase Mu 3	1.00071e+06	706165	608567	862082	955451	785166	709325	614766	26291266	34149132	40691204	20409836	25295016	19922924	19003798	21034374	744634	1158726	994353	1.68745e+06
0	1.19154	19530.5	P19783	Cox4i1	Cytochrome c oxidase subunit 4 isoform 1, mitochondrial	15458929	16258062	13653588	13587462	14928908	15995049	13441126	12550566	12415660	11718313	11309025	11318798	13829789	15040786	13668901	14556806	13060528	14920021	15258224	16229567
0	1.02247	36713.8	P19973	Lsp1	Lymphocyte-specific protein 1	71522	12822.3	21136.1	9566.79	24437.2	11278.4	28997.5	30153.8	284319	210472	339949	393034	57135.9	121299	41208.6	58533.1	109766	21553.5	16852.8	18145.4
0	1.18902	72422.1	P20029	Hspa5	Endoplasmic reticulum chaperone BiP	18672516	20521272	15210923	21996024	24148620	24416420	20894948	24225318	26340042	24032184	27641586	30913912	23799614	17359626	20124382	17143814	23894992	25304226	22417658	22781422
0	1.14197	61115.7	P20060	Hexb	Beta-hexosaminidase subunit beta	449473	522828	403208	372546	427727	359473	332370	365459	803387	935123	961644	865528	376964	374844	304534	384898	415949	450301	394110	482804
0	1.15512	5679.46	P20065	Tmsb4x	Thymosin beta-4	837214	799105	667925	516815	622153	618439	603627	989914	2108948	2.4568e+06	1892191	1.91491e+06	730053	534424	782108	617310	479071	430536	360204	541740
0	1.1757	28127	P20108	Prdx3	Thioredoxin-dependent peroxide reductase, mitochondrial	7729267	9029145	7.59491e+06	6875864	6592045	7.81138e+06	7562060	7132035	9205141	9922318	9414007	8881403	8.3558e+06	9532305	8045745	8301335	7354872	7.36716e+06	7.27986e+06	8941542
0	1.19861	53687.7	P20152	Vim	Vimentin	2.31749e+06	2.2775e+06	2324126	1.55257e+06	1.07912e+06	1.21048e+06	1.97183e+06	2148660	4196316	4.40442e+06	9442118	10236526	1.89756e+06	1.3504e+06	2.14986e+06	2.25692e+06	2.10141e+06	915287	3.21063e+06	2673502
0	1.14097	9652.46	P20491	Fcer1g	High affinity immunoglobulin epsilon receptor subunit gamma	39814.2	75912.8	54026.3	26450.4	53430.5	28612.3	32516.2	36754.6	118467	153702	139810	128068	31965.1	28931.6	33359.8	31653	26550.4	17981.6	14970.3	27082.6
0	1.17358	56740.8	P20852	Cyp2a5	Cytochrome P450 2A5	2.94694e+06	3.25816e+06	5.92953e+06	2304579	1.63683e+06	2.05022e+06	2.20956e+06	1.84669e+06	1.91517e+06	2.33737e+06	3208362	3.15598e+06	3.68673e+06	4017849	3.40383e+06	3.09874e+06	4750443	4.08133e+06	4111226	4.35486e+06
0	1.15048	90807.9	P20918	Plg	Plasminogen	883536	1.15405e+06	985240	1.06259e+06	930514	897821	744846	1.0492e+06	781957	725148	759817	817071	780158	642656	665260	753280	741315	814514	773848	891333
0	1.18157	32994	P21107	Tpm3	Tropomyosin alpha-3 chain	841400	659284	860719	747022	626612	463506	746709	1.16217e+06	1.60724e+06	1.55253e+06	2.47009e+06	2976731	1.46359e+06	1.08717e+06	1.02596e+06	757962	1.1521e+06	877503	1.22374e+06	1.40521e+06
0	1.10543	17800.6	P21126	Ubl4a	Ubiquitin-like protein 4A	161167	195439	115414	118566	121962	124918	101566	127484	262429	238518	268746	264062	157220	158772	135968	141108	164504	168815	128106	126256
0	1.14805	42024.2	P21278	Gna11	Guanine nucleotide-binding protein subunit alpha-11	640018	629062	567400	551092	632037	617725	577481	517482	704681	605392	702261	688697	531525	487000	524378	560071	723248	699967	664453	586590
0	1.09839	42158.1	P21279	Gnaq	Guanine nucleotide-binding protein G(q) subunit alpha	159288	153034	133337	136298	140579	124948	125628	123605	200547	203915	89339.9	180395	129946	108290	92683.8	83156.8	127897	113357	96852.6	86571.7
0	1.14272	35988.4	P21300	Akr1b7	Aldo-keto reductase family 1 member B7	128654	128627	140697	96961.9	144362	99538.9	123238	97797.9	1.22437e+06	1.94586e+06	982320	376752	289326	210269	190089	200951	100309	115112	118306	115452
0	1.15054	140377	P21440	Abcb4	Phosphatidylcholine translocator ABCB4	772522	596293	889146	557422	464617	408620	377697	388807	808186	758656	791007	886850	577613	566336	538397	600933	412607	362488	444114	346702
0	1.14338	47024.9	P21550	Eno3	Beta-enolase	8399020	12591530	11574854	6018633	9481494	4663991	8709142	4908876	8074302	15147050	6.7393e+06	6249065	6.825e+06	5.66494e+06	5.75091e+06	4581681	9116073	4233852	4929445	4.05149e+06
0	1.18108	53600.3	P21614	Gc	Vitamin D-binding protein	1.9312e+06	1.9059e+06	1.6143e+06	2.32244e+06	2.16788e+06	2127980	1967911	2.39805e+06	2.65183e+06	2410977	2.87009e+06	2.69743e+06	2.09172e+06	1.83835e+06	1824135	1970138	1.90592e+06	2161176	2.02239e+06	2.0031e+06
0	1.14304	67318.1	P21619	Lmnb2	Lamin-B2	634570	617882	1020528	912142	513175	628569	805228	754081	555006	454921	915087	1.1687e+06	448910	400546	636414	626763	725930	604828	959504	928702
0	1.13364	78864.1	P21958	Tap1	Antigen peptide transporter 1	111197	99924.3	101873	47419.1	58931.7	92162.8	88846.3	44779.5	138626	122790	128821	135079	112311	95247.7	102593	100225	96748	120011	83986.1	124139
0	1.17559	77061	P21981	Tgm2	Protein-glutamine gamma-glutamyltransferase 2	2.71068e+06	3692032	2.33472e+06	2.77641e+06	2898101	3.23905e+06	3688689	3.67371e+06	5459345	5636675	7109635	6.3662e+06	5.59413e+06	4.01021e+06	5818810	5.7033e+06	2.47086e+06	2.85448e+06	2.65271e+06	3098788
0	1.15377	47421.7	P22315	Fech	Ferrochelatase, mitochondrial	1.17096e+06	1288557	1.28828e+06	1.08953e+06	1.16957e+06	1.17344e+06	1145545	1.15183e+06	2.1905e+06	2.54235e+06	2.03856e+06	2.07497e+06	1.70509e+06	1557556	1.38343e+06	1.48505e+06	1.45285e+06	1.37804e+06	1.44178e+06	1507964
0	1.1431	69042.4	P22437	Ptgs1	Prostaglandin G/H synthase 1	170632	168120	148807	111060	117504	134116	135541	124032	245787	293738	250918	278541	111173	95206.1	117998	124991	122638	124648	100767	110402
0	1.1351	45974.6	P22599	Serpina1b	Alpha-1-antitrypsin 1-2	864955	905533	736052	767918	779712	492334	454464	464524	737951	830166	762311	698049	452428	535960	396187	452311	465177	551595	507918	632406
0	1.11546	91350.5	P22892	Ap1g1	AP-1 complex subunit gamma-1	183434	188621	213419	215122	190951	239508	237863	214052	213311	230403	233750	214595	188728	184591	204056	208016	172660	187056	200560	184965
0	1.12837	39344.4	P22907	Hmbs	Porphobilinogen deaminase	334140	324987	334616	335909	315811	329464	355455	314188	353086	332480	353668	305855	368597	322659	337593	335322	302146	342869	285878	319419
0	1.16572	161936	P23116	Eif3a	Eukaryotic translation initiation factor 3 subunit A	1714170	1.73322e+06	1.71994e+06	1.61681e+06	1.65642e+06	1.6182e+06	1.50926e+06	1552600	1.69325e+06	1.64529e+06	1.9595e+06	1.83461e+06	1.58862e+06	1.51826e+06	1.49332e+06	1.51652e+06	1.60708e+06	1.70911e+06	1.63191e+06	1.59526e+06
0	1.13533	20855.4	P23198	Cbx3	Chromobox protein homolog 3	112211	128741	195348	163653	69028.6	94185.2	184650	225159	158969	146689	245494	264721	92211.4	73131.7	185011	161345	94549.8	92538.1	150756	193555
0	1.09993	113583	P23249	Mov10	Putative helicase MOV-10	186626	179354	170799	172999	181241	204306	215457	192602	230500	227307	263365	215615	212650	180032	193365	181191	189369	202361	179432	230030
0	1.06465	69484.3	P23475	Xrcc6	X-ray repair cross-complementing protein 6	13010.5	7820.1	35944.9	22393.8	11481.4	18027.9	13915.8	7185.75	32649.5	31955.5	55539.9	50848.1	12429.7	17410.5	32446.9	35516.7	12583.4	7354.19	30512.3	32026.6
0	1.18076	32277	P23492	Pnp	Purine nucleoside phosphorylase	2579978	2357855	2.25862e+06	2.53226e+06	2588602	2.53512e+06	2.49954e+06	2.56241e+06	2.83683e+06	3.07001e+06	2724541	3.04536e+06	2.98544e+06	2.68932e+06	2.63052e+06	2710943	2.40336e+06	2.30947e+06	2314830	2.1836e+06
0	1.12778	24634.4	P23506	Pcmt1	Protein-L-isoaspartate(D-aspartate) O-methyltransferase	161185	231841	268084	169694	176264	127119	248058	206926	171181	172805	147593	135415	109291	88981.1	74149.5	126042	53964.8	42786.6	101714	93266.4
0	1.16272	34072.5	P23589	Ca5a	Carbonic anhydrase 5A, mitochondrial	1248835	1.3566e+06	1.31891e+06	1.40434e+06	1.43532e+06	1.41342e+06	1.49718e+06	1.32524e+06	778265	842964	588441	684085	1.22904e+06	1.76175e+06	1.55527e+06	1658460	1.93131e+06	1.84073e+06	1.84142e+06	1.77066e+06
0	1.14365	35877.6	P23591	Gfus	GDP-L-fucose synthase	454158	384784	415366	403393	441236	495686	410857	415618	451082	484689	490271	447443	470445	415213	357245	397727	461835	445680	447225	435521
0	1.13241	73121	P23780	Glb1	Beta-galactosidase	483718	529370	479704	499931	411151	337559	308607	263904	440422	516373	423468	417131	351423	300316	356384	383953	418409	372428	446511	413494
0	1.08742	36384.6	P23950	Zfp36l1	mRNA decay activator protein ZFP36L1	168060	319909	304469	88890.1	62347.3	81555.7	45237.5	117690	106846	76413.9	105783	111730	79129.5	79554.1	42896	86713.1	66018.4	58060.4	61835.2	75173.9
0	1.17503	61055.8	P23953	Ces1c	Carboxylesterase 1C	1.16371e+06	1069882	1.16028e+06	1.6406e+06	1.60418e+06	1.402e+06	1.29264e+06	1.5327e+06	1.8098e+06	2.33669e+06	1352101	1941110	1.29421e+06	1.16752e+06	1.1544e+06	1.0811e+06	1.42274e+06	1.42179e+06	1.40657e+06	1757964
0	1.10051	128314	P24063	Itgal	Integrin alpha-L	249693	279367	236085	220716	231368	228750	251072	359746	195412	200382	236180	180991	186740	172268	185864	181364	133234	107076	116161	156734
0	1.19711	59795.3	P24270	Cat	Catalase	62446088	62029640	54220568	44787464	45970160	44382704	41853584	49000644	26737434	31014224	29370680	38299960	64844732	66551340	50190464	59936632	59372080	55832932	54804316	54227704
0	1.17234	23713.5	P24369	Ppib	Peptidyl-prolyl cis-trans isomerase B	4.84167e+06	5.19077e+06	4.3013e+06	4.67453e+06	5354843	6.26524e+06	6188358	5.51334e+06	6298999	6.41015e+06	6.8115e+06	6284722	4760376	4.40095e+06	5327364	5.90287e+06	4.49327e+06	4282629	5558014	5.45553e+06
0	1.14312	39240.4	P24452	Capg	Macrophage-capping protein	70002.9	80793.9	57271.1	43166.4	49386.4	39891	65094.7	66910.1	290895	352790	312569	415791	96541	85818.9	61533.7	72177.2	37052.1	22621.6	32433.8	44074.1
0	1.19207	57233.4	P24456	Cyp2d10	Cytochrome P450 2D10	15826911	13465352	15068212	18771706	20374152	19352098	19903274	19559880	15783549	15375056	15741900	18107792	17838590	14781080	16252871	15183780	20450860	19151132	20439564	17102708
0	1.20092	56988	P24457	Cyp2d11	Cytochrome P450 2D11	2.18467e+06	2.18419e+06	2.47931e+06	3.08922e+06	2.79986e+06	3.82641e+06	3799455	3.71083e+06	3.29122e+06	3.64714e+06	2.96985e+06	3349610	3.32205e+06	3226988	3605623	3.24354e+06	3.56547e+06	3386796	3.84638e+06	3.34806e+06
0	1.18164	25563.9	P24472	Gsta4	Glutathione S-transferase A4	2.27446e+06	1.80855e+06	1.82034e+06	2.92312e+06	2.13584e+06	2243977	2.71982e+06	1942906	8843842	9663120	9066569	7.82474e+06	6.01072e+06	4911864	5214542	6.50397e+06	3.05405e+06	3.23015e+06	3.18147e+06	3.24271e+06
0	1.16421	69050.9	P24527	Lta4h	Leukotriene A-4 hydrolase	1.02575e+06	939345	965116	1.09778e+06	1.15609e+06	1.12337e+06	1069424	1.1313e+06	1.03504e+06	1149438	1.09365e+06	1.12163e+06	927360	896571	887648	952871	958241	948420	971116	931564
0	1.13878	55815.1	P24547	Impdh2	Inosine-5'-monophosphate dehydrogenase 2	499454	407790	396611	430327	467244	523226	456968	464205	849569	680882	801318	653684	651952	498557	431121	467576	551066	591116	549723	524327
0	1.18734	54467.8	P24549	Aldh1a1	Aldehyde dehydrogenase 1A1	9021251	8.05567e+06	9582203	15740920	11285675	14674775	12868305	12625650	10083844	10342781	11256895	12666670	14521642	17307706	14581766	15779852	15130870	15043195	14436809	8554526
0	1.11385	48508.7	P24638	Acp2	Lysosomal acid phosphatase	315191	361762	256025	265233	228405	332746	173052	184035	636324	779969	721976	928896	347642	262765	270381	304280	279231	292446	278876	369983
0	1.14931	31172.4	P24668	M6pr	Cation-dependent mannose-6-phosphate receptor	416755	481211	405057	424979	419229	440091	384953	430547	567311	546171	577128	536558	394629	332054	369873	354184	357521	387505	394972	349825
0	1.16678	34906.8	P24721	Asgr2	Asialoglycoprotein receptor 2	329269	268816	372470	438688	552555	401771	410172	439717	233688	259630	231229	189231	264157	293883	294653	333037	295786	330893	366525	356831
0	1.14903	20274.4	P25085	Il1rn	Interleukin-1 receptor antagonist protein	144001	625214	156169	91242.9	87741.6	90861	39573.1	60966.3	762093	1.0075e+06	1.17009e+06	1.15902e+06	229848	152501	146602	121559	56485.9	52931.3	76060.6	151320
0	1.09417	91546.3	P25206	Mcm3	DNA replication licensing factor MCM3	29608.8	65781.1	19426.9	26956.9	26890.6	18335.8	25677.9	17530.8	234915	128707	245871	143629	51616.7	68809.9	71086	15968	14471.7	26560.8	13416.3	11481.4
0	1.18035	31231.3	P25444	Rps2	40S ribosomal protein S2	6.35113e+06	6.50621e+06	6650755	6.23263e+06	6638012	6.65272e+06	6.3464e+06	6616293	6.97268e+06	6665212	7712326	7338554	6564045	5.90703e+06	5.90777e+06	5.85247e+06	6.26662e+06	6.50189e+06	6.18095e+06	6.18443e+06
0	1.18119	35039.2	P25688	Uox	Uricase	17404422	10747337	7519693	5770076	6.84196e+06	5.60633e+06	4984865	5874072	6818754	5.25489e+06	6085764	5657897	5.09228e+06	6.14106e+06	5668087	5996840	10204376	7678253	6.25489e+06	6.19518e+06
0	1.04231	105615	P25799	Nfkb1	Nuclear factor NF-kappa-B p105 subunit	13158.1	11423.4	13822.9	7266.47	11748.7	8026.68	15862.2	8436.29	33597.6	28992.7	32525.7	36334	13813	12618.5	12261.5	10008.9	17774.4	14724.6	7919.7	13149.2
0	1.10569	58812.3	P25911	Lyn	Tyrosine-protein kinase Lyn	155534	165815	171075	150171	181117	170388	139120	130682	185855	230701	199667	205452	172745	144917	156041	155428	163875	168903	188056	216327
0	1.07189	89509	P25976	Ubtf	Nucleolar transcription factor 1	29137.3	28341.1	60168.9	50688.5	14273.9	31516.1	52583	54015.8	32529.4	29416.3	38449.3	39773.5	25752.5	23417.9	21147.6	29468.5	16417.2	13190.2	30133.4	37617.6
0	1.19376	269821	P26039	Tln1	Talin-1	2.41571e+06	2.36384e+06	2.25352e+06	2.11067e+06	1913490	1.94419e+06	2.00043e+06	2.1653e+06	3387825	3.76662e+06	3.67291e+06	3.88131e+06	2.03914e+06	1.76006e+06	1.95613e+06	1946767	1.87601e+06	1.78963e+06	1.82183e+06	2.01394e+06
0	1.1392	69406.8	P26040	Ezr	Ezrin	118988	66300.9	84099.2	78959	77852.9	80159.6	72428.5	73101	242169	250982	243836	306093	154072	105144	87578.1	93985.7	107984	75993	55588.4	76874.9
0	1.15156	67767	P26041	Msn	Moesin	729474	824662	623918	520457	581455	562100	541619	543218	1.86628e+06	2.01779e+06	1.87573e+06	2126714	937390	659619	701786	672257	742175	689986	644276	824146
0	1.17053	68542.8	P26043	Rdx	Radixin	4306203	4.16886e+06	3888867	4081463	4234323	4208799	4391176	4.48097e+06	4501877	4.89085e+06	4409929	4815911	4.67861e+06	4.19137e+06	4028672	4114189	4.59422e+06	4.53083e+06	4.38288e+06	4672272
0	1.15057	42031.2	P26150	Hsd3b3	3 beta-hydroxysteroid dehydrogenase/Delta 5-->4-isomerase type 3	1321006	1.3835e+06	1184302	1.48038e+06	2.37194e+06	2.42809e+06	2.53706e+06	2263966	1.49518e+06	1.63142e+06	1.43203e+06	1.39008e+06	1807460	1.62842e+06	2.12576e+06	2.17852e+06	1857325	1.82283e+06	2.13406e+06	1.87944e+06
0	1.173	100106	P26231	Ctnna1	Catenin alpha-1	943882	830224	1168892	1.02138e+06	798746	895876	1.12042e+06	1.11505e+06	1.02447e+06	1.12683e+06	1.31074e+06	1.41758e+06	768688	661318	921514	1.00795e+06	830874	801046	1.01071e+06	1.1171e+06
0	1.15547	71382.6	P26262	Klkb1	Plasma kallikrein	250041	259860	248462	366767	392083	367887	226070	353667	324361	291088	263016	283067	293351	224204	257438	281482	297850	344938	388408	337246
0	1.14704	12254.1	P26350	Ptma	Prothymosin alpha	224684	244200	193416	166772	139759	198759	206961	197835	408502	354060	269766	382786	236626	157848	274840	220334	224570	227961	181821	293952
0	1.10842	53517	P26369	U2af2	Splicing factor U2AF 65 kDa subunit	523242	584636	516226	409436	401808	440199	474000	427562	271091	314534	419027	491754	287140	222935	321358	328379	321281	318238	318476	352519
0	1.1986	61336.8	P26443	Glud1	Glutamate dehydrogenase 1, mitochondrial	42635820	42777716	35932592	35037776	36559308	37684684	33674692	35359100	50806144	48559780	48309388	53601808	45927908	43010608	41407600	34526996	48249288	46727948	42932908	42649324
0	1.15723	36539.8	P26516	Psmd7	26S proteasome non-ATPase regulatory subunit 7	901457	794248	830055	840882	772907	889263	720889	935492	1.08069e+06	1.06699e+06	955485	1.00239e+06	1.12838e+06	1.10926e+06	957268	859789	961464	972438	819282	838499
0	1.14883	58388.7	P26638	Sars1	Serine--tRNA ligase, cytoplasmic	662478	594157	560713	674594	667489	682973	594408	680662	923532	901041	937681	958763	773345	700402	638405	653092	739484	709195	610481	680680
0	1.15	29661.3	P26645	Marcks	Myristoylated alanine-rich C-kinase substrate	510235	498092	405428	306270	296962	364689	277392	193835	621766	727510	553257	709740	322476	249887	370541	362243	256933	225778	189729	348474
0	1.17698	11922.6	P26883	Fkbp1a	Peptidyl-prolyl cis-trans isomerase FKBP1A	1.57344e+06	1.53652e+06	1.42019e+06	1.42783e+06	1272919	1.40131e+06	1.21938e+06	1.40122e+06	2.30497e+06	2.28219e+06	2377426	2349877	1.86956e+06	1562379	1.51491e+06	1.65492e+06	1.25739e+06	1.26442e+06	1.19731e+06	1.39743e+06
0	1.14019	10294.6	P27005	S100a8	Protein S100-A8	100594	326406	59385.9	150788	28410.8	38941	27883.5	268997	538998	525224	595509	865296	166632	45483.6	24075	35461.3	58412.6	41675.6	13855.6	40497.5
0	1.15243	131631	P27046	Man2a1	Alpha-mannosidase 2	1.04381e+06	1.12835e+06	1.03028e+06	865006	800401	824862	738276	862869	1.12542e+06	1.1069e+06	1.29026e+06	1.25339e+06	833665	853680	811942	769596	707595	960679	820313	880954
0	1.16246	23655.94;24614.03	P27048;P63163	Snrpb;Snrpn	Small nuclear ribonucleoprotein-associated protein B;Small nuclear ribonucleoprotein-associated protein N	832353	999095	874571	732816	630301	789779	833266	769441	791860	654386	970682	931435	594921	528835	667852	646662	600055	573985	609093	655187
0	1.17601	117429	P27546	Map4	Microtubule-associated protein 4	318270	327841	286190	262177	301946	318229	327368	362048	581195	615241	656048	611875	370448	358297	322389	347647	271345	261127	220626	284137
0	1.13492	44054.6	P27601	Gna13	Guanine nucleotide-binding protein subunit alpha-13	184707	172686	158632	157028	197716	168599	169931	164590	257861	295874	307793	293618	213005	192302	178642	182881	207177	191773	193842	219599
0	1.1606	87221.1	P27612	Plaa	Phospholipase A-2-activating protein	269871	301954	284476	310620	291017	332796	300939	318030	296994	296824	308068	307475	316224	287203	324067	309471	245659	256111	278921	263095
0	1.1397	83056.9	P27641	Xrcc5	X-ray repair cross-complementing protein 5	56714.8	68708.8	130408	103745	23039.1	24804	87710.3	82950.1	112567	89249.8	185413	188173	37406.8	44489.2	88686.1	111903	43413.3	40320.7	83449.6	99045.9
0	1.17912	46109.9	P27659	Rpl3	60S ribosomal protein L3	5191191	5256882	5095720	4844672	5.25274e+06	5305457	5.03566e+06	5621612	5.4243e+06	5.33035e+06	5831001	5731540	5155139	4.83205e+06	4.89545e+06	4.72037e+06	5020128	5.06051e+06	5.14227e+06	4886171
0	1.17708	15142.6	P27661	H2ax	Histone H2AX	2362955	2.47178e+06	43013528	27748588	1.15654e+06	1.1282e+06	25095506	24409774	948771	928062	27418362	41477736	962577	1.23952e+06	19720876	22359896	756669	803031	17313836	18634042
0	1.18165	56678.4	P27773	Pdia3	Protein disulfide-isomerase A3	18403462	18830700	16146353	21393402	22656260	22425264	20331004	22111878	26140250	24491580	27380338	29397052	22806394	17191688	19890068	17810814	23537310	25632028	22021068	23227840
0	1.05568	57637.9	P27786	Cyp17a1	Steroid 17-alpha-hydroxylase/17,20 lyase	101894	125366	182850	152852	58088.2	76936	11923	58320.6	11374	31604.4	26749.6	41892.6	9107.61	89641.4	17226.3	89790.6	32314.8	42977.3	25946.7	65756.3
0	1.08168	51690.2	P27808	Mgat1	Alpha-1,3-mannosyl-glycoprotein 2-beta-N-acetylglucosaminyltransferase	82767.5	81688.3	70786.6	71922.9	51404.9	58196.2	43355.8	43825.9	84798.9	78920	82195.6	81881.8	61143.2	41372.4	64684.8	55568.3	37998.4	46828.6	38630.2	34791.7
0	1.09273	98136.8	P27870	Vav1	Proto-oncogene vav	122210	70257.1	46866	27232.1	21827.1	30470.4	56046.5	22540.5	122981	123817	147783	126657	27350.4	24413	52145.2	44754.1	22150	12583.3	15454.3	35751.9
0	1.14842	30260.2	P28063	Psmb8	Proteasome subunit beta type-8	543811	597450	416617	452174	594137	584851	582666	550338	836031	874637	833280	780736	668026	611182	623177	653305	478793	541681	522276	534590
0	1.14381	23396.5	P28076	Psmb9	Proteasome subunit beta type-9	210346	175277	154451	741387	168259	116693	1.26578e+06	93190.4	186167	209321	107066	224862	172708	146085	128392	159204	211364	70011.1	66838.9	63136
0	1.15251	32003.5	P28230	Gjb1	Gap junction beta-1 protein	189068	236903	271955	223143	213643	176240	231908	187086	133938	235914	132495	246824	220047	151430	264964	315168	222936	212532	239728	291304
0	1.17342	98125.6	P28271	Aco1	Cytoplasmic aconitate hydratase	5.62314e+06	5.31004e+06	5359432	6767415	7.44653e+06	7221223	7.11158e+06	7398578	7.20387e+06	7150487	6942910	7.29149e+06	8284877	7.52333e+06	6475541	7307083	8.22111e+06	8741910	7.54407e+06	7.42275e+06
0	1.06827	29095.6	P28293	Ctsg	Cathepsin G	27405.4	17551.8	7908.78	34882.5	11969.4	24674.9	11578.7	25695	44770.6	37030.2	54526.5	107905	18798.3	7128.2	11228.3	13777.9	6254.96	6726.86	6605.92	14008.9
0	1.16245	35490.4	P28352	Apex1	DNA-(apurinic or apyrimidinic site) endonuclease	819864	876553	798083	602900	539546	603459	628049	664128	964391	948293	905877	1.0345e+06	660030	541512	554190	659340	587312	598461	541235	733293
0	1.18368	39547.7	P28474	Adh5	Alcohol dehydrogenase class-3	12639286	10978060	11788640	14856052	14256926	16293825	16379762	16381243	12992411	13638398	10333670	11936586	12503543	11716227	11613786	12756719	12165628	13492626	12346667	13474027
0	1.12265	50254.4	P28650	Adss1	Adenylosuccinate synthetase isozyme 1	183581	166274	178971	149352	145245	129810	184130	132089	307427	387788	270290	263994	195923	209300	173127	226136	208734	161869	202295	193995
0	1.15121	33081.3	P28651	Ca8	Carbonic anhydrase-related protein	147040	144347	164564	217876	324426	282890	331374	264897	341550	357038	336716	369743	332459	304956	263630	284757	309089	302564	307913	252918
0	1.11145	41639.2	P28653	Bgn	Biglycan	132218	101673	140249	113471	108908	95988.3	145565	188169	267171	276720	364968	304745	179122	137906	104136	101582	193002	84397.4	177941	163127
0	1.12193	39809	P28654	Dcn	Decorin	117348	63314	114775	95900.6	52908.7	64519.3	89657.6	146397	128728	161345	175934	173627	110534	90588	79461.1	58064.3	206235	41857.5	220894	91475.5
0	1.13691	45345.1	P28656	Nap1l1	Nucleosome assembly protein 1-like 1	119435	140836	153501	121246	126334	88585.3	81186.8	102358	193272	204584	273691	288995	132570	142575	112692	75180.1	112570	107834	121302	117721
0	1.14467	53706.9	P28658	Atxn10	Ataxin-10	180195	145064	197177	101029	104622	104727	92747	93945.9	140276	158378	175942	146769	105093	105151	125052	113288	93542.5	101698	103170	110854
0	1.15334	52107.2	P28659	Celf1	CUGBP Elav-like family member 1	829397	864174	866183	769121	745486	719221	770815	797706	771621	744773	930304	746540	737306	727066	680801	716529	615168	616953	692902	736193
0	1.10951	128784	P28660	Nckap1	Nck-associated protein 1	256143	268230	270002	231779	286830	221169	220348	269691	338771	314473	421294	292737	259864	246066	204296	229969	230754	252306	251817	263048
0	1.13278	54935.9	P28661	Septin4	Septin-4	111300	108979	111521	88600.4	134733	110264	103607	103457	142770	156634	161925	155072	134108	122351	104153	103299	113351	115138	106356	135870
0	1.18994	165298	P28665	Mug1	Murinoglobulin-1	3.1432e+06	3.51226e+06	3067005	3613477	4781858	4474545	4.25879e+06	4.22608e+06	3.32617e+06	3845027	2993989	3.96742e+06	2.53218e+06	2.18404e+06	3.00151e+06	3235026	3.4663e+06	3.38472e+06	3968885	3.63913e+06
0	1.19108	162382	P28666	Mug2	Murinoglobulin-2	118274	111394	116128	406426	451415	465812	476681	485522	868278	775147	1.17943e+06	1.29047e+06	514600	368126	424665	361225	519774	646516	632975	709463
0	1.09953	20165.4	P28667	Marcksl1	MARCKS-related protein	433810	484331	653005	691269	520077	438188	472557	906960	1.26159e+06	620489	1.12677e+06	1.2198e+06	575701	621152	87386.5	583779	76168.9	93162.6	158561	247096
0	1.12252	51216.75;50893.25	P28700;P28705	Rxra;Rxrg	Retinoic acid receptor RXR-alpha;Retinoic acid receptor RXR-gamma	49065.8	63315.8	97584.8	70452.8	57310.9	44138	65229.7	54019.9	52601	32662.1	60082.1	48087.9	38791.8	57013.6	68898.3	54917	34569.8	48609.7	52212.2	56664.4
0	1.17176	63458.2	P28798	Grn	Progranulin	5551771	6.16875e+06	5.32711e+06	3.38836e+06	2.57876e+06	2492424	2.27136e+06	2.80794e+06	3.56764e+06	3.89485e+06	4895162	4.14569e+06	2235547	2.3318e+06	2742306	2.0061e+06	3.20601e+06	3.40722e+06	2.62877e+06	3.71698e+06
0	1.17145	87436.8	P28843	Dpp4	Dipeptidyl peptidase 4	1.6516e+06	1.44195e+06	1.76667e+06	1.66463e+06	1.60946e+06	1686373	1730787	1.76534e+06	1.0213e+06	1.39129e+06	1.14654e+06	1.34586e+06	1.18921e+06	1.2701e+06	1.35412e+06	1.38198e+06	1.41528e+06	1.42078e+06	1.54477e+06	1533914
0	1.0887	77547.3	P28867	Prkcd	Protein kinase C delta type	15256.3	16631.5	13369.7	21351.3	16310.4	8508.8	16594.7	8316.71	38506.2	39857.9	56426.6	40121.4	7667.51	17834.6	6485.04	10295.9	8887.43	19653.7	11069.7	9610.82
0	1.16829	70670.8	P29341	Pabpc1	Polyadenylate-binding protein 1	4.64819e+06	4791358	3.94736e+06	3316155	3.7768e+06	3.58882e+06	3202088	3.47126e+06	4.38133e+06	3957300	4912304	4.57481e+06	3.64015e+06	3597266	3.13914e+06	3135226	3.91566e+06	4.1073e+06	3.84957e+06	3.73027e+06
0	1.13543	67559	P29351	Ptpn6	Tyrosine-protein phosphatase non-receptor type 6	368767	360948	359547	372773	356189	361566	379012	382081	627360	680326	726275	749152	385035	368212	303436	355387	340612	328342	296613	382607
0	1.20873	20802.4	P29391	Ftl1	Ferritin light chain 1	4355935	5.28e+06	6.28961e+06	5.08961e+06	4.82845e+06	4.35569e+06	3.34799e+06	4.76825e+06	9641198	10784414	7.8929e+06	9367973	5362759	4.99533e+06	4.20565e+06	3.22782e+06	3594563	4799494	3.09619e+06	5.66313e+06
0	1.12663	60613.1	P29416	Hexa	Beta-hexosaminidase subunit alpha	493037	527308	467795	393703	388771	367238	403533	356396	775843	793959	884318	795749	442060	390747	354291	354988	417770	363137	327252	464353
0	1.10594	81317.4	P29533	Vcam1	Vascular cell adhesion protein 1	2.31858e+06	2.78441e+06	1.6977e+06	1.06602e+06	174628	1.09489e+06	1.16718e+06	1.69998e+06	394980	369993	317390	536320	406439	774213	994982	1.05696e+06	834773	737443	683592	844469
0	1.10298	8972.41	P29595	Nedd8	NEDD8	21540.8	19995.3	46278.2	23572.9	28305.6	16165	14270.8	15431.3	7604.47	11152.7	9927.13	12998.4	12942.6	11207.9	7856.38	11028	8687.58	12770.5	7522.1	12412.9
0	1.16406	37325.6	P29699	Ahsg	Alpha-2-HS-glycoprotein	4307291	6663790	4.13441e+06	2.6247e+06	2480995	2.03498e+06	1.82268e+06	2.4603e+06	2.24181e+06	2.90583e+06	2541642	2.34203e+06	1503456	1.12805e+06	1.31915e+06	1.11323e+06	1.58602e+06	1.39846e+06	1.68352e+06	1.95123e+06
0	1.17949	48354.6	P29758	Oat	Ornithine aminotransferase, mitochondrial	9952440	11892152	12024376	5.81086e+06	4287312	6.27223e+06	6242534	5214870	4342802	4.90551e+06	3.10844e+06	4.76552e+06	7.7966e+06	16670901	8790754	9363932	7150575	7.74209e+06	7909524	10139564
0	1.13908	54849	P29788	Vtn	Vitronectin	675958	713516	778711	744893	572358	447375	469493	656195	549163	497689	624140	657022	472270	366032	481207	426553	374789	440805	409310	492485
0	1.21529	25360.5	P30115	Gsta3	Glutathione S-transferase A3	66697932	51023884	53487084	71499112	79607472	74506880	66742168	79711696	124279800	113726416	111867248	147111920	119620352	118643256	78678480	90836680	124076424	143409888	104307784	112475688
0	1.10573	50169.7	P30204	Msr1	Macrophage scavenger receptor types I and II	82023.5	75075.8	79483.5	67854	53844.6	68287.2	56033.1	50312.7	85715.8	99484.3	90804.3	92756.8	61277.3	47173.3	70295.7	79982.6	37294.1	38428.3	22851.9	37382.3
0	1.12265	22794.2	P30412	Ppic	Peptidyl-prolyl cis-trans isomerase C	93945.2	93036.5	96414.1	61289.7	75985.6	68013.5	42343	38586.5	101212	99278.7	102406	93210.6	50590.2	44430.4	26456.4	34717.8	36751.2	20430.8	22923.8	10253.3
0	1.12612	163449	P30415	Nktr	NK-tumor recognition protein	776444	920261	776957	869579	1.00879e+06	1.2436e+06	1.27537e+06	1.15648e+06	631826	614788	744868	585508	479643	522717	611538	866951	362290	367371	412470	408167
0	1.16371	51572.4	P30416	Fkbp4	Peptidyl-prolyl cis-trans isomerase FKBP4	1.31496e+06	1.13315e+06	1.20934e+06	1.94754e+06	2.16508e+06	2.2663e+06	2397272	2.18728e+06	1.03108e+06	934085	1.14414e+06	933994	1.71665e+06	1.59041e+06	1.69473e+06	2.0526e+06	1.64429e+06	1.52189e+06	1553528	1.46954e+06
0	1.17105	24161.9	P30681	Hmgb2	High mobility group protein B2	1.74692e+06	2.25099e+06	2.25235e+06	2.05636e+06	1.46533e+06	1.30293e+06	1.29973e+06	2.3049e+06	6211015	5126306	6853346	8165472	2.21884e+06	1.70791e+06	2.18032e+06	2.21314e+06	1.37112e+06	1.53234e+06	1.44856e+06	2.32833e+06
0	1.13128	13019.5	P30933	Svs5	Seminal vesicle secretory protein 5	24431.7	9048.99	14156.1	279388	10953.2	22745	10744.1	20171.3	11283.1	10719.2	21101.1	19261	21746.9	13879.8	20112.8	17238.5	20641.6	16874.7	15545.4	14512.2
0	1.14285	104925	P30999	Ctnnd1	Catenin delta-1	781650	767192	1.04286e+06	859164	774083	760806	924020	915203	832112	885675	1.16259e+06	1.20466e+06	716083	644020	775670	859682	754011	794691	940862	965874
0	1.13301	53497.8	P31001	Des	Desmin	639494	274990	236200	165389	93534.8	99838.6	208656	269449	234386	183945	767950	730040	213571	115389	235137	238697	231598	73004.4	517961	331277
0	1.15541	33997.2	P31230	Aimp1	Aminoacyl tRNA synthase complex-interacting multifunctional protein 1	671672	675980	568139	719496	696219	752769	685304	767938	750294	737513	762129	752942	755010	671171	640173	667278	636468	653548	595975	669403
0	1.15843	68285.1	P31649	Slc6a13	Sodium- and chloride-dependent GABA transporter 2	227801	165183	252054	317395	342853	523231	397137	268474	338528	351673	344148	260343	283056	341013	413074	496075	250552	307071	448520	432324
0	1.15053	69613.6	P31651	Slc6a12	Sodium- and chloride-dependent betaine transporter	202431	359791	376076	458088	406873	527447	521333	480134	133149	186843	137030	132194	248807	240054	191449	268891	297081	477775	434904	510591
0	1.18168	13048.9	P31725	S100a9	Protein S100-A9	777912	2.42454e+06	598156	1.30092e+06	212066	344647	232209	1.66495e+06	2.27184e+06	2.54041e+06	2704013	3451756	567317	317057	182189	322363	205495	186692	121053	161790
0	1.04526	55707.3	P31750	Akt1	RAC-alpha serine/threonine-protein kinase	39694.3	43866.8	42266.8	45798.3	37833.4	37517.1	47089.9	35153	35391.2	53005.7	22620.8	39749	22534	38564	26999.8	50809.4	29849.7	31779.9	42775.4	43779.7
0	1.19942	10000.4	P31786	Dbi	Acyl-CoA-binding protein	15703612	15538366	14438074	15953234	16087389	14361683	13401865	15191996	22397628	21698474	19995062	17885296	27853618	28233874	23750952	20254146	21319612	23250366	24601996	22347140
0	1.15014	57015.8	P31809	Ceacam1	Carcinoembryonic antigen-related cell adhesion molecule 1	580087	620907	752217	594630	658756	700234	328268	697857	342476	232448	254745	293143	394143	431296	733779	310088	644034	576466	663078	642768
0	1.12821	43474	P31938	Map2k1	Dual specificity mitogen-activated protein kinase kinase 1	175840	127729	175300	204461	159254	220278	161232	94524.8	195980	165014	169690	185864	165521	128175	141233	127206	160910	135784	126877	155289
0	1.13616	34817.8	P31996	Cd68	Macrosialin	274001	315601	268105	222708	239917	341024	279800	303126	959169	1.62096e+06	1.15336e+06	969686	303727	279531	447411	384737	193536	171047	169066	230134
0	1.20939	59125.7	P32020	Scp2	Sterol carrier protein 2	89396536	87211800	64524840	42887536	39422236	38132628	35305188	38254324	27318380	24616510	29894912	35101812	43527960	35282304	40612308	38513692	37935436	44470056	37262928	43972692
0	1.15927	47756.5	P32067	Ssb	Lupus La protein homolog	619926	617841	558003	529491	447740	425962	476281	476265	701567	595119	706768	705193	438551	366972	395526	426702	415357	405849	399471	438213
0	1.14428	40512.1	P32233	Drg1	Developmentally-regulated GTP-binding protein 1	325715	312594	289299	277919	330763	316367	285805	269792	337126	328446	388770	329146	347276	306019	330023	310231	317563	315605	292238	311444
0	1.16567	52003.6	P32261	Serpinc1	Antithrombin-III	1.22083e+06	1.2782e+06	1.191e+06	1.61511e+06	1.11956e+06	1.21178e+06	1.03607e+06	1.1751e+06	1.54227e+06	1.58253e+06	1.34276e+06	1.7499e+06	1.1103e+06	1.10479e+06	1.03418e+06	1.09767e+06	1.10458e+06	1.14258e+06	1.11729e+06	1.27349e+06
0	1.11448	57317.6	P32507	Nectin2	Nectin-2	110517	102183	83357.4	98196.7	85370.5	73289.5	47428.3	43683.9	142896	120529	143245	155267	145427	100116	52300.4	96678.9	127999	133072	126496	132437
0	1.13304	21655.8	P32883	Kras	GTPase KRas	403385	400271	385079	314223	397685	364695	351533	337816	217725	257166	307698	250107	241878	273448	196860	265961	272656	288593	269262	259370
0	1.13995	54357.9	P32921	Wars1	Tryptophan--tRNA ligase, cytoplasmic	552844	457432	414291	455684	527778	545078	448912	474987	687174	685688	728513	698709	582680	484925	507983	542861	629320	497470	477691	534335
0	1.19053	55948.7	P33267	Cyp2f2	Cytochrome P450 2F2	5.7558e+06	5840505	4.88062e+06	6762684	8469778	7490831	7.15427e+06	6862936	2.7757e+06	2.4598e+06	2919140	2.29759e+06	6.49834e+06	4.89192e+06	7.18416e+06	7402204	6.75883e+06	6939769	7.5559e+06	6.5922e+06
0	1.10269	51818.1	P33587	Proc	Vitamin K-dependent protein C	204821	248031	175168	146770	248750	293954	245480	259890	141006	143831	119182	86899.1	127181	127030	194069	131710	110242	105351	90134.2	69469.4
0	1.12202	10982.4	P33622	Apoc3	Apolipoprotein C-III	766366	804755	655436	469996	428775	345957	340606	569520	364974	375100	389546	429342	364283	403687	295252	234537	251104	236274	226875	241311
0	1.1486	23596.4	P34022	Ranbp1	Ran-specific GTPase-activating protein	648069	557815	620363	541382	619680	521425	475301	494394	1.04709e+06	1.00823e+06	1.03657e+06	999606	821939	760647	710949	673768	671638	688411	616521	752963
0	1.1831	12504.3	P34884	Mif	Macrophage migration inhibitory factor	10762510	9457351	10588081	15416083	11771062	13237027	12054665	11189900	14648846	17308610	13610361	14082867	12185287	7545538	13030652	13992796	12196438	12765671	10442269	13649866
0	1.18485	62515.3	P34914	Ephx2	Bifunctional epoxide hydrolase 2	18386860	14955663	16127753	13204192	12415101	14042720	12589484	14200930	7740618	7.27164e+06	6510917	8765850	11838916	12129178	11146303	11380645	14574881	13950768	13959026	12503791
0	1.16372	32591.5	P34927	Asgr1	Asialoglycoprotein receptor 1	2.54176e+06	2.25009e+06	2661137	3120984	2944573	3.15995e+06	3.115e+06	3.05772e+06	1.46335e+06	1.33408e+06	1.34336e+06	1231413	1.91677e+06	1.94931e+06	1.78107e+06	2115746	2282178	2.36064e+06	2613759	2510578
0	1.167	9696.41	P34928	Apoc1	Apolipoprotein C-I	896275	863514	1097376	1.08465e+06	935580	729487	791514	1.0678e+06	978989	1.03646e+06	948474	997289	898468	1.01857e+06	830431	900877	608764	601364	648037	588747
0	1.10697	108343	P35123	Usp4	Ubiquitin carboxyl-terminal hydrolase 4	109250	108288	105642	136915	148170	126050	121978	118704	185594	195420	207125	174888	170021	164833	151343	145601	142758	159227	143286	138749
0	1.08201	19476.2	P35230	Reg3b	Regenerating islet-derived protein 3-beta	29069	128730	42997.6	16310.6	15639.3	10362.2	15351.4	9581.02	29756.2	8847	11047.8	15080.4	11013.1	16018.5	10362.2	9209.48	10735.3	15935.9	19808.7	11296.7
0	1.12993	68034.8	P35235	Ptpn11	Tyrosine-protein phosphatase non-receptor type 11	211022	210524	207656	205249	225430	264346	200198	229092	257997	273350	282679	245473	238045	198576	222078	266389	226285	203684	220758	207303
0	1.14543	23412.5	P35278	Rab5c	Ras-related protein Rab-5C	585902	559990	479503	472511	566596	449056	489105	425662	705456	665377	788812	661976	613673	605024	519628	486802	679750	625199	552383	521571
0	1.15649	23589.8	P35279	Rab6a	Ras-related protein Rab-6A	701465	750354	585259	452968	394830	323135	372095	342958	555953	509350	610801	563656	530396	467974	443650	413948	388805	387812	379783	399546
0	1.14752	24106.3	P35282	Rab21	Ras-related protein Rab-21	351733	344372	303469	336554	323814	317071	310284	307078	338448	310770	340976	304573	256615	251119	285122	283884	254441	258385	270958	249142
0	1.04349	23144.2	P35290	Rab24	Ras-related protein Rab-24	107865	109065	81332.4	93995.4	96046.1	102651	95504.5	38705.4	69737.1	75797.5	96039.5	115646	76103.3	68412.3	70355.8	64454.7	82602.5	78462	34617.9	72997.9
0	1.15533	23035.2	P35293	Rab18	Ras-related protein Rab-18	2056975	1843182	1.13743e+06	1.13353e+06	1.10757e+06	726738	937919	1167204	1.17058e+06	1.09056e+06	1.05587e+06	1167753	1.15784e+06	1.14494e+06	928392	923676	1.22475e+06	1.20851e+06	965208	952646
0	1.0988	129647	P35441	Thbs1	Thrombospondin-1	241095	319015	184773	180876	144585	94391.5	82916.8	156933	177806	257618	147636	168434	69140.9	76124.6	91017.8	72213.6	87817.6	65172.6	77283.1	82748.1
0	1.11076	13395.5	P35459	Ly6d	Lymphocyte antigen 6D	198207	197931	46105.1	14235.7	6732.96	14588.5	7195.07	11954.2	302692	172477	519331	164602	40934.7	56186.8	22132.8	16411.7	6029.38	7633.79	8081.12	17646.8
0	1.17129	43231.6	P35486	Pdha1	Pyruvate dehydrogenase E1 component subunit alpha, somatic form, mitochondrial	3.58244e+06	3.95678e+06	4.08389e+06	3.58351e+06	3.42336e+06	3753319	3.72138e+06	3329640	4.23961e+06	4.30452e+06	3952028	3.82068e+06	3822479	4.41943e+06	4.38436e+06	3.80895e+06	3.75799e+06	3.65338e+06	3.61955e+06	3.27128e+06
0	1.18354	72257.9	P35492	Hal	Histidine ammonia-lyase	5205709	4107083	5811636	9131156	7895170	6112142	7964436	6589972	7.30296e+06	7876752	3.4987e+06	5.22026e+06	7132549	7400726	7938929	8.30977e+06	7710988	7.50806e+06	8.186e+06	10043717
0	1.20393	46175.8	P35505	Fah	Fumarylacetoacetase	28652882	27202100	27194920	31938240	34402540	34749920	33537748	30007646	26599020	28414432	23344708	25826064	29221266	31085148	26878228	31147550	30249908	35157168	31644050	32616972
0	1.13343	34306.8	P35550	Fbl	rRNA 2'-O-methyltransferase fibrillarin	164045	171997	439871	368028	78901	110874	418896	454350	246052	149722	322188	409898	106802	71398.6	303729	241234	194624	120460	358006	440311
0	1.17975	67277.9	P35564	Canx	Calnexin	5546068	5701147	5058327	7087500	7027801	7.36182e+06	7.27424e+06	6707570	6356374	5.91257e+06	6811411	6291629	5942149	4718192	6.06386e+06	6308016	5696141	5942964	6118735	6273925
0	1.13206	40472.7	P35576	G6pc1	Glucose-6-phosphatase catalytic subunit 1	497418	398124	380239	262799	370781	277292	200323	206346	132684	75503.5	112086	182351	212556	237470	251074	143804	207183	257593	243669	271643
0	1.1568	48542.8	P35585	Ap1m1	AP-1 complex subunit mu-1	400697	430187	435220	435576	440062	474875	539592	520733	490770	542456	538674	512754	449031	405826	436356	448223	268869	302191	341652	320416
0	1.19652	22176.5	P35700	Prdx1	Peroxiredoxin-1	56925152	51484276	48611704	53712480	55333656	55042920	48501828	53255084	65601776	66366552	64910044	62632608	63066436	64222016	52872464	57844172	57433592	63312424	52146444	58140284
0	1.14526	25814.5	P35762	Cd81	CD81 antigen	336903	263994	388886	668068	684380	898983	832974	877552	567738	588031	511642	597971	628229	461370	630821	651136	687737	622309	738701	619492
0	1.1556	49593.3	P35821	Ptpn1	Tyrosine-protein phosphatase non-receptor type 1	206902	227109	172152	180083	162651	157125	154278	159847	216057	219251	237160	232309	151664	152624	166486	154555	144041	157294	139603	141773
0	1.03096	164186	P35822	Ptprk	Receptor-type tyrosine-protein phosphatase kappa	32848.4	29951	36998.6	45187.4	24864.6	33005	41938.7	52991	40407.7	38633.8	54094.7	62983.1	26011.1	16825.5	23813.7	16361.3	26270.2	24374.2	22962.7	30341.3
0	1.05907	86526.4	P35831	Ptpn12	Tyrosine-protein phosphatase non-receptor type 12	61111.4	54643	55694.7	35253.5	44021.6	53132.8	47623.2	28355.8	85647.6	94296.9	74630.1	80352.5	50927.5	53450.4	40026.6	51005.5	53475.2	50668.4	50212.2	54505.1
0	1.05587	68989.1	P35922	Fmr1	Fragile X messenger ribonucleoprotein 1	8998.73	14605.8	12559.1	12541	11468.8	11780.5	15798.7	13879.7	19292.5	19735	24063.8	17742.8	11392.4	15190.1	19374.9	15082.1	11413.2	11627	10952.4	13805.4
0	1.13434	94947.3	P35951	Ldlr	Low-density lipoprotein receptor	363629	415118	471015	162750	311186	305814	293272	322578	286478	278074	337491	309596	264257	361727	237844	271972	279189	277232	279999	299249
0	1.17097	17804.6	P35979	Rpl12	60S ribosomal protein L12	5.43543e+06	5.37487e+06	4940631	4771094	4997475	5546319	5.27982e+06	5661010	4.99687e+06	4645184	5.05318e+06	5.06424e+06	4.60622e+06	4.11431e+06	4584032	4188157	4426145	4.53023e+06	4.26913e+06	4.57247e+06
0	1.18169	21644.5	P35980	Rpl18	60S ribosomal protein L18	9760626	9379330	9382139	9097888	9634239	9610001	8620391	10113152	11107657	10275885	11815596	12200884	10163196	8881078	9189949	8619815	10257577	10587306	10075426	9671356
0	1.0694	77444.8	P36371	Tap2	Antigen peptide transporter 2	39347.6	39046.3	37754.2	20296.1	35354.7	39360.5	29313.3	44895	45467.7	39071.5	43200.8	56787.8	34245	26518	21569.9	27683.6	26875.4	35336	22050.5	37446.4
0	1.09618	60391	P36423	Tbxas1	Thromboxane-A synthase	95598.8	69203.9	62587.3	45843.4	31461.8	42937.3	17175.4	45835.7	208938	242955	262493	241295	38200.7	34149.4	31705.6	35975.1	38718.8	21864.4	19664.4	39625.9
0	1.10315	22370.8	P36536	Sar1a	GTP-binding protein SAR1a	77912.4	78215.3	48696.2	65854.6	65943.4	73830.5	26554	75197.7	72282	76570.9	65314.5	81488.5	80547.1	73454	77495.1	67082.5	84174.1	78184.3	60086.3	77710.5
0	1.1659	49714.5	P36552	Cpox	Oxygen-dependent coproporphyrinogen-III oxidase, mitochondrial	1.36599e+06	1.55711e+06	1.49419e+06	1.52935e+06	1.32337e+06	1.38425e+06	1491896	1.61598e+06	1309628	1372147	1.13311e+06	1.36582e+06	1.38627e+06	1.7203e+06	1.6639e+06	1.67368e+06	1.44422e+06	1369317	1456866	1.11858e+06
0	1.01899	68771.1	P36916	Gnl1	Guanine nucleotide-binding protein-like 1	43179.2	23965	16659.2	59007.4	61590.9	56397.5	61664.2	77464.6	49740.5	50629.2	55275.7	74656	55953.7	60439.1	41986.9	38059.8	51142	43981.3	46821.4	56519.4
0	1.13028	42795	P36993	Ppm1b	Protein phosphatase 1B	328816	292030	283730	306074	308098	299148	285679	287490	312083	313297	292927	277312	368033	393637	289175	300401	436590	407323	364011	356750
0	1.17764	77043.9	P37040	Por	NADPH--cytochrome P450 reductase	13744401	13239682	13619817	9613353	7.60606e+06	8.04137e+06	8.0095e+06	8442576	9701530	10910872	8333765	10853987	9262227	9717200	9018729	8581454	7.46788e+06	7.64458e+06	7.72715e+06	9556294
0	1.13357	22575.8	P37804	Tagln	Transgelin	281401	74814.9	65561.9	58916.5	76927.2	60593.7	48372.7	59719.9	529999	420450	241286	167490	498017	154937	92647.4	119820	357301	57501.7	200182	242519
0	1.16486	34238.8	P38060	Hmgcl	Hydroxymethylglutaryl-CoA lyase, mitochondrial	4205754	4.42367e+06	4396429	3.51453e+06	3700702	3619789	3.22778e+06	3886155	4234740	4226858	4239724	4658420	4296186	4.85331e+06	4.04198e+06	3.98056e+06	4.4858e+06	4258884	3974237	3.96409e+06
0	1.1908	73461.2	P38647	Hspa9	Stress-70 protein, mitochondrial	19651366	21142980	19422520	15767254	16235973	17122754	16967114	16432565	15939491	15902409	15506586	15637649	16746092	17817396	17902392	16515729	15647081	14861383	15969284	19114968
0	1.17767	25396	P39039	Mbl1	Mannose-binding protein A	439715	466017	333916	936035	770887	746537	710947	810176	340192	268055	338437	410740	649507	467229	647087	605627	648809	718589	717490	503606
0	1.14809	98145.3	P39054	Dnm2	Dynamin-2	408011	397491	375164	394002	405615	416714	393428	444828	535336	577858	568463	580765	471882	399498	393910	420407	382629	416511	394270	406065
0	1.15028	182172	P39061	Col18a1	Collagen alpha-1(XVIII) chain	224252	162288	298834	311752	181061	174288	315560	308338	620908	612459	1.02608e+06	981366	284451	206652	377183	339228	211939	215457	310469	276302
0	1.14811	194742	P39447	Tjp1	Tight junction protein ZO-1	270590	241332	268539	243841	150834	187234	277620	251509	422093	438349	464836	479665	278042	207193	285957	312684	233159	243476	269880	302226
0	1.15664	51564.8	P40124	Cap1	Adenylyl cyclase-associated protein 1	1602771	1.51902e+06	1.41269e+06	1.42605e+06	1.34453e+06	1.42432e+06	1.35603e+06	1.32326e+06	2.92152e+06	3.30365e+06	3.22136e+06	2.95338e+06	1.71182e+06	1.52329e+06	1.51028e+06	1.54299e+06	1.23201e+06	1.26427e+06	1.17657e+06	1.3945e+06
0	1.19695	67630.5	P40142	Tkt	Transketolase	13788432	12778756	13014708	11101830	10900582	10682301	9693945	9828313	14898958	13657638	14740457	17294850	13491089	12065163	10697228	10318500	12183876	12683847	10803506	10386433
0	1.14698	29628.5	P40237	Cd82	CD82 antigen	259213	149718	236308	331312	402291	364201	361048	383863	357605	400319	383331	436821	329869	247400	262482	295443	349432	302160	360922	299918
0	1.13376	25258	P40240	Cd9	CD9 antigen	24403.9	11377.6	36964	18083.5	33902	16479.2	20232.7	36662.9	118917	164525	164580	154393	66879	54636.9	39932.9	38151.8	33554.4	27294.3	46461.8	40296.1
0	1.14266	38113.8	P40336	Vps26a	Vacuolar protein sorting-associated protein 26A	973305	1.02883e+06	877920	921690	965403	1.07664e+06	970332	999865	1.15805e+06	1.07276e+06	1.07176e+06	1191128	789013	769742	808703	876231	855415	838161	893804	861950
0	1.13554	27987.5	P40630	Tfam	Transcription factor A, mitochondrial	1.04838e+06	1.144e+06	1.47809e+06	1.32927e+06	1.26539e+06	1.10033e+06	1.01213e+06	978021	1.38756e+06	1.23253e+06	1316565	1.35623e+06	1.14679e+06	1.30243e+06	1.21593e+06	1.15347e+06	1.57023e+06	1.37094e+06	1.44291e+06	1.58963e+06
0	1.19522	29459.8	P40936	Inmt	Indolethylamine N-methyltransferase	15981790	14588165	16466703	15704465	19526166	18685248	18564138	17254590	8866442	6.96436e+06	4528209	8315390	18130204	13863089	18973526	15157296	25007478	24937644	23853068	23881878
0	1.19453	15733.5	P41105	Rpl28	60S ribosomal protein L28	6592971	7729911	8957693	9492254	9196707	9058954	8893517	8752610	9498330	9413233	10823839	10325946	8.38323e+06	7822685	8.34819e+06	7.89355e+06	7.69047e+06	8.09239e+06	7950658	8021419
0	1.18252	77951.5	P41216	Acsl1	Long-chain-fatty-acid--CoA ligase 1	16973728	16782492	15073207	13633494	15683269	17076822	15502370	15094080	5482611	4.67584e+06	4.27038e+06	5910291	11322615	11611038	12290012	12927481	18082906	15625534	18018044	14291248
0	1.04566	253912	P41233	Abca1	Phospholipid-transporting ATPase ABCA1	68766.8	135110	37912.5	37247.1	38415.1	29557.1	27962.8	35594.7	45400.6	66705.1	29069.5	53393.1	21517.1	27829	18804.1	17910.1	35047.3	40650.5	32375.7	38557
0	1.12489	50716.3	P41241	Csk	Tyrosine-protein kinase CSK	95020.6	86545.2	99073.1	102787	101418	105378	114772	100472	139738	156842	166411	146153	120214	107603	125321	116935	107880	115433	101345	113034
0	1.12587	80535.4	P41245	Mmp9	Matrix metalloproteinase-9	18685.1	32696.4	12825.3	19367.6	15162.2	19397.4	15776.6	17193.5	67884.2	50595.4	72960.9	111085	18111	12029.3	17031.2	17778.1	12524.8	11901.2	6449.76	15128.9
0	1.15857	25957.1	P41317	Mbl2	Mannose-binding protein C	185103	136699	174863	653509	521159	491389	426821	490590	489038	373131	488216	373561	589010	438231	562754	502097	445371	456382	466058	535441
0	1.08511	25766.7	P41731	Cd63	CD63 antigen	36131.3	50826.9	6535.49	11207.8	8633.01	7472.52	8078.55	21361.1	129515	136053	201229	182826	15552.9	10361.6	17425.2	20845.4	14554	9696.13	6362.29	21845.7
0	1.1759	32250.4	P42125	Eci1	Enoyl-CoA delta isomerase 1, mitochondrial	9612724	9638249	9411430	8285747	7.33682e+06	7.99268e+06	7.90025e+06	7.6886e+06	5.65367e+06	5943228	4.61223e+06	5.56166e+06	7.429e+06	8.16188e+06	8276606	7345693	9674562	8.31883e+06	9168492	7605384
0	1.14608	41525.5	P42208	Septin2	Septin-2	551168	611788	532479	502512	528084	553597	523166	556238	799239	839502	778159	834771	606293	553094	502497	518361	485912	493435	477783	499996
0	1.15434	87197.4	P42225	Stat1	Signal transducer and activator of transcription 1	741367	522735	735700	476967	536619	570155	512686	584063	702309	782536	794701	731345	482210	618258	530726	533681	462981	583412	441644	596396
0	1.12911	88053.8	P42227	Stat3	Signal transducer and activator of transcription 3	806491	896743	883459	861589	608480	657741	556972	745291	577140	529469	608775	578899	476263	478284	426646	458770	468348	636976	452347	630689
0	1.15095	90002.1	P42232	Stat5b	Signal transducer and activator of transcription 5B	394731	341835	329196	448798	513952	456553	413232	462431	598158	566999	602404	574953	538067	473214	412023	491798	484910	494480	454889	415856
0	1.0451	124412	P42337	Pik3ca	Phosphatidylinositol 4,5-bisphosphate 3-kinase catalytic subunit alpha isoform	19264.8	16859.2	17158.2	15884.4	17966.9	12784.6	11125.4	8113.62	22157.5	21075.3	16375.5	18049.4	18375.5	15619.7	18902	19010.4	13847.6	16282.1	15918.5	13174.3
0	1.11973	98471	P42567	Eps15	Epidermal growth factor receptor substrate 15	205714	220408	185343	177319	167535	179304	180819	172789	220696	158788	215784	222097	152045	134376	147755	157622	133509	161607	150013	179773
0	1.14618	34883.7	P42669	Pura	Transcriptional activator protein Pur-alpha	1.48761e+06	1.3889e+06	1.43771e+06	1.57458e+06	1.45595e+06	1.38647e+06	1.36489e+06	1.32189e+06	1.37106e+06	1.33324e+06	1.16e+06	1.43125e+06	1.11026e+06	987311	1.06621e+06	1.08219e+06	1.32265e+06	1.39292e+06	1.46138e+06	1.63898e+06
0	1.0687	46412.2	P42867	Dpagt1	UDP-N-acetylglucosamine--dolichyl-phosphate N-acetylglucosaminephosphotransferase	78798.2	176006	117117	204417	155476	184323	198758	105877	79557.5	32718.7	55714.1	115854	18950.6	33230.9	16425.5	92477.4	63274.5	81680.9	88927.8	64965.1
0	1.143	22265.7	P42925	Pxmp2	Peroxisomal membrane protein 2	534975	619631	631289	609994	362313	504696	557027	532037	362216	536690	424597	382435	310800	500692	514346	679153	302141	355860	471180	514010
0	1.16684	59555.5	P42932	Cct8	T-complex protein 1 subunit theta	1.62211e+06	1.54603e+06	1.54477e+06	1.79352e+06	1.87226e+06	2.04077e+06	1889427	2.02223e+06	1.93651e+06	1.69852e+06	2137819	1.85966e+06	1980566	1.9375e+06	1.87418e+06	1.9792e+06	1.86844e+06	1.79574e+06	1.85307e+06	1.69372e+06
0	1.06847	62030.2	P43006	Slc1a2	Excitatory amino acid transporter 2	46065.9	45833.2	57460.6	44468.9	63469.1	66436.1	64517.5	63970.5	54422.6	24447.8	32379	32063.7	23282.2	32704.9	16350.8	8514.95	15629	24009	26425.3	29456.5
0	1.15191	12352.1	P43024	Cox6a1	Cytochrome c oxidase subunit 6A1, mitochondrial	4.16845e+06	4.50027e+06	4731213	4.33791e+06	4.24361e+06	4593276	4.45148e+06	4267271	2914399	2.18465e+06	2.20747e+06	2.63986e+06	3.7751e+06	3.9867e+06	4.34304e+06	4.05948e+06	3.96404e+06	4.25765e+06	4296865	5310908
0	1.08984	18518.6	P43137	Reg1	Lithostathine-1	20641.6	20972	30424.2	15420.6	28560.9	13581.3	28453.5	13188.6	278121	25933.2	7936.42	6972.44	38246.4	13227.9	9442.92	9464.52	257545	4619.48	6118.42	9216.26
0	1.11801	45496.7	P43142	Gpr182	G-protein coupled receptor 182	117501	121867	136596	140506	188377	198586	153596	189945	94041.6	86697.5	80769.7	68971.2	77894.4	101655	61402.4	128546	84305.9	79123.9	86813.8	87355.6
0	1.16956	21977.3	P43274	H1-4	Histone H1.4	782478	613652	2.90441e+06	2.53233e+06	406031	547142	2844633	3437285	678358	548524	2.76934e+06	4.45797e+06	436930	305210	1.26568e+06	1200647	428816	515424	1.98493e+06	2.81642e+06
0	1.12408	21785.1	P43275	H1-1	Histone H1.1	37708.3	53878.4	144147	146721	27322.1	23546.2	125361	109310	81860.9	71615.5	473659	583674	37144.2	31320.1	159580	129897	16601.1	8060.87	77910.9	130209
0	1.14637	22576.1	P43276	H1-5	Histone H1.5	308857	438972	2.53395e+06	1.77899e+06	199620	232168	2259270	1.83596e+06	645721	673824	6314083	6.78024e+06	313013	358480	2.91658e+06	2514501	135875	139637	1.02586e+06	1.89616e+06
0	1.18971	22099.5	P43277	H1-3	Histone H1.3	4.8617e+06	5.28714e+06	21759550	18245718	3.17657e+06	3.7485e+06	16802974	18011644	7.73187e+06	6467706	34842968	45304180	4.41922e+06	4030247	18916164	16613756	4.00139e+06	4.04693e+06	19970592	24501344
0	1.14889	115360	P43406	Itgav	Integrin alpha-V	43648.2	27286.4	29858.1	24859.7	38037.2	33473.8	19796.1	22597.2	137694	163245	170845	139848	59293	35179	46731	30147.9	35910.3	28295.8	36410.4	46666.3
0	1.16042	46646	P43883	Plin2	Perilipin-2	2366649	2919230	1607087	251011	101059	65570.4	61148.2	61261.3	85651.7	53813.7	81972	117764	139270	290185	169823	187874	86650	108243	80760.2	62149.2
0	1.15994	35732.2	P45376	Akr1b1	Aldo-keto reductase family 1 member B1	2.52292e+06	2.80195e+06	2.52174e+06	1.93021e+06	2.53669e+06	2598217	2.29839e+06	2110042	7947840	8878465	9453232	6.81641e+06	4.52427e+06	3720286	3069271	4.01306e+06	2.69661e+06	2.18149e+06	2.07529e+06	2.65541e+06
0	1.10319	36120.5	P45377	Akr1b8	Aldose reductase-related protein 2	161624	155462	132616	76004.7	74924.5	91463	74753.5	57145.7	210706	245791	197242	200253	135629	93084	109045	106298	97332.6	85497.8	100846	116384
0	1.06595	265494	P45481	Crebbp	Histone lysine acetyltransferase CREBBP	6315.44	6128.44	12572.3	8501.12	11288	7607.72	3745.9	4986.54	11821.8	14138.2	16564.2	18260.8	9337.45	11043.5	5287.3	10145.8	12969.7	11436.3	9725.34	13663.2
0	1.15092	18709.6	P45591	Cfl2	Cofilin-2	832523	840304	813035	858829	809050	894391	927770	741661	816419	813343	787013	796353	752584	748514	790337	818903	691574	790575	785303	819516
0	1.0768	73275.8	P45700	Man1a1	Mannosyl-oligosaccharide 1,2-alpha-mannosidase IA	207334	141644	173243	203852	195144	180054	219813	206249	301824	250996	311656	291581	262061	193509	196982	251088	214851	275288	248062	292947
0	1.17875	15343.9	P45878	Fkbp2	Peptidyl-prolyl cis-trans isomerase FKBP2	1.37033e+06	1.23103e+06	1.28066e+06	1.62072e+06	1.44159e+06	1.47887e+06	1.70511e+06	1.59469e+06	1.69381e+06	1.41738e+06	1.97943e+06	1.74656e+06	1.75627e+06	1.75806e+06	1.75898e+06	1.53334e+06	1.57595e+06	1.64727e+06	1.58493e+06	1.69757e+06
0	1.18945	46481.2	P45952	Acadm	Medium-chain specific acyl-CoA dehydrogenase, mitochondrial	15907394	15751538	15185123	13631263	11626175	12196406	12146200	12842919	15804947	16522716	14502100	17117008	15870791	19214850	15332035	13900180	15297373	12866428	14345871	14126263
0	1.14261	63530.9	P46061	Rangap1	Ran GTPase-activating protein 1	333452	317437	281751	265486	247735	243643	168967	204240	355036	372952	374939	356569	271719	240593	242344	241780	254051	252566	240172	261666
0	1.14256	25424.1	P46412	Gpx3	Glutathione peroxidase 3	555854	510208	578547	571563	406573	406141	316752	468061	499351	603874	608829	678327	289863	346805	237494	294956	378538	285232	418503	485789
0	1.13868	22193.4	P46414	Cdkn1b	Cyclin-dependent kinase inhibitor 1B	98760.9	87490.3	70436.5	116749	123740	99440	90028.3	138963	112658	108754	123742	64716.5	106315	96352	68373.7	97008.7	90122.6	95260.5	50441	67803
0	1.15207	82613.4	P46460	Nsf	Vesicle-fusing ATPase	428286	452888	392585	380182	337501	369167	368280	381567	659554	634599	673393	695026	474205	436691	416708	406434	407119	388990	389320	390283
0	1.1343	49419.3	P46467	Vps4b	Vacuolar protein sorting-associated protein 4B	365343	330477	325924	328344	387647	370710	319922	379307	443066	428019	506177	513002	388030	384328	336042	329450	378683	412205	365604	355489
0	1.17792	48647.9	P46471	Psmc2	26S proteasome regulatory subunit 7	1.4135e+06	1.40831e+06	1.47046e+06	1.54311e+06	1.43929e+06	1.55856e+06	1.36304e+06	1554568	1.48854e+06	1.45481e+06	1.46248e+06	1.38824e+06	1.40074e+06	1378394	1.38266e+06	1.42201e+06	1.23385e+06	1.29761e+06	1.24406e+06	1.21549e+06
0	1.18824	24489.5	P46638	Rab11b	Ras-related protein Rab-11B	1.73563e+06	1.69465e+06	1.53331e+06	1.64242e+06	1.57304e+06	1.27411e+06	1.55348e+06	1.39754e+06	2.22314e+06	2235818	2.46415e+06	2.51538e+06	1910500	1.62187e+06	1.73128e+06	1.51672e+06	1632806	1624838	1.5706e+06	1.58511e+06
0	1.17951	20122.9	P46656	Fdx1	Adrenodoxin, mitochondrial	2.52494e+06	2681433	2.43464e+06	2.07534e+06	2.52232e+06	2.43951e+06	2146316	2.24899e+06	1.5084e+06	1.83376e+06	1.82996e+06	2.02396e+06	2.39782e+06	2.34795e+06	2.18052e+06	2.20974e+06	3.33665e+06	3.16256e+06	3.23269e+06	2803927
0	1.13823	50021	P46664	Adss2	Adenylosuccinate synthetase isozyme 2	586065	582524	554215	574321	605221	638640	556999	543400	1.00372e+06	900988	1157584	912144	766410	757995	559643	676144	611906	617864	534702	553303
0	1.14641	128564	P46735	Myo1b	Unconventional myosin-Ib	1237445	1.01733e+06	1.48782e+06	1.28995e+06	1.20663e+06	1.10675e+06	1447164	1.34217e+06	1.10697e+06	1.25987e+06	1.80349e+06	1.80145e+06	938904	854943	1.12594e+06	1.25121e+06	1.15174e+06	1.27148e+06	1.67353e+06	1.5878e+06
0	1.1135	33340.1	P46737	Brcc3	Lys-63-specific deubiquitinase BRCC36	97914.5	92411.8	82400.9	87610.1	111847	131714	110330	135519	91890.3	98431.4	80421.1	81540.4	73128.8	69773.9	48704.9	92339.2	48670.1	62069.1	59565.2	53221.3
0	1.1401	102706	P46935	Nedd4	E3 ubiquitin-protein ligase NEDD4	504131	548792	519313	311862	289401	304445	297152	352919	448163	436009	532064	517386	311401	301721	268545	246035	382472	381281	365813	365086
0	1.0573	52383.3	P46938	Yap1	Transcriptional coactivator YAP1	239858	311293	281368	191710	235120	234471	295529	265986	191092	164372	314707	287203	282162	213873	207659	232458	180405	239668	270683	262754
0	1.16978	80597.6	P46978	Stt3a	Dolichyl-diphosphooligosaccharide--protein glycosyltransferase subunit STT3A	2.20183e+06	2342308	2140997	2.21876e+06	2338468	2423961	2.21309e+06	2.11051e+06	2.51759e+06	2.44538e+06	2.54337e+06	2387393	1.92406e+06	1.6392e+06	2.02952e+06	2044905	2.18363e+06	2315854	2.44018e+06	2.37193e+06
0	1.17487	35268.6	P47199	Cryz	Quinone oxidoreductase	2.98544e+06	2.76057e+06	2.80958e+06	3.47198e+06	3.1979e+06	3.53881e+06	3.53352e+06	2.99614e+06	3.9164e+06	4173201	3.70908e+06	3.54073e+06	3349024	3437280	3.23677e+06	3.6052e+06	3.56071e+06	3774647	3.47489e+06	3.63789e+06
0	1.0131	47983.2	P47226	Tes	Testin	10953.4	24280	19683.1	15900.8	19030.6	9049.45	18857	8657.07	38163	31665.8	47724	48963.5	13245.8	7240.27	11098.1	6499.81	4204.54	15841.2	18894.2	7186.55
0	1.20873	56537.5	P47738	Aldh2	Aldehyde dehydrogenase, mitochondrial	45695716	48516044	45189812	41402952	43029576	44571300	45106968	41565880	58340496	59126360	53608604	53615184	51311016	57505936	52214272	47545452	56756296	58689272	53280284	52051776
0	1.17614	53970.8	P47740	Aldh3a2	Aldehyde dehydrogenase family 3 member A2	5.17909e+06	4.07937e+06	4527616	4569363	3.40442e+06	4500382	3.71475e+06	3.64125e+06	4377752	3.81569e+06	4166432	5665524	6346074	8.25185e+06	7134554	6.99321e+06	7.04751e+06	6951404	6614081	4.30526e+06
0	1.15503	32939.8	P47753	Capza1	F-actin-capping protein subunit alpha-1	542289	572980	496974	475160	455502	509794	496988	565285	578884	634340	673204	672062	446146	360625	408760	537477	383005	392732	368371	434621
0	1.15827	32967.1	P47754	Capza2	F-actin-capping protein subunit alpha-2	1613376	1.60445e+06	1.6025e+06	1.6098e+06	1.41095e+06	1.5038e+06	1.6628e+06	1.56494e+06	2.02259e+06	2.21893e+06	2.08897e+06	2332811	1.53239e+06	1.31125e+06	1.60933e+06	1.54038e+06	1.46708e+06	1.48212e+06	1.61464e+06	1.74899e+06
0	1.1505	31345.5	P47757	Capzb	F-actin-capping protein subunit beta	904245	868614	910644	910106	896696	953998	933690	1.34202e+06	1.08002e+06	1.1862e+06	1.12386e+06	1.19023e+06	849183	777773	851637	910486	845561	818414	836642	860664
0	1.12831	29579	P47758	Srprb	Signal recognition particle receptor subunit beta	311954	328293	262529	343359	322125	375284	366617	339868	329523	327220	358602	334412	279080	240733	266396	323901	238404	243753	282144	256410
0	1.16381	53662.7	P47791	Gsr	Glutathione reductase, mitochondrial	1.42685e+06	1.54471e+06	1.36955e+06	1.45032e+06	1.35412e+06	1448991	1459461	1.6169e+06	2.06294e+06	2.21197e+06	2.21431e+06	2.23835e+06	1.67424e+06	1.53041e+06	1.36757e+06	1.49365e+06	1.24436e+06	1.26265e+06	1.20815e+06	1.36517e+06
0	1.1441	35623.9	P47802	Mtx1	Metaxin-1	531882	556470	651799	537752	500498	451550	572568	578864	499733	526842	443592	512515	561856	534409	602129	479436	649209	601214	601682	588507
0	1.12377	44113.6	P47809	Map2k4	Dual specificity mitogen-activated protein kinase kinase 4	54096.9	51111.8	56767.3	58383.4	56392.3	60133.9	60331.7	77773.1	71602.5	71906.3	70729.6	76956.6	56914.6	59120	45694.4	49774.8	48312.8	49723.4	45229.8	56529.7
0	1.12577	41287.2	P47811	Mapk14	Mitogen-activated protein kinase 14	177462	155062	156602	174227	181316	160739	177096	165967	236507	230231	243125	204038	144015	176327	134133	164510	150563	157405	155690	149754
0	1.12428	78539.1	P47856	Gfpt1	Glutamine--fructose-6-phosphate aminotransferase [isomerizing] 1	619874	576541	433436	584426	612343	663331	646189	654055	663016	675187	571281	601057	657584	620757	396412	563143	554602	642690	459607	446319
0	1.10742	85268.6	P47857	Pfkm	ATP-dependent 6-phosphofructokinase, muscle type	71621.8	65872.2	98231.9	89674.6	122195	110472	68132.8	43045.9	121144	85907.4	89437.4	92606	120443	101610	96081.9	95677.2	154369	141101	119151	112268
0	1.10896	29569.8	P47876	Igfbp1	Insulin-like growth factor-binding protein 1	202525	535051	197840	19807.2	28971.5	26290.2	22691.2	15894.5	14852.1	16383.3	11942	24486.6	14185.4	17052.8	15022.3	18351.9	16784.4	11243.7	13667	17416.3
0	1.10164	32846.7	P47877	Igfbp2	Insulin-like growth factor-binding protein 2	77412.8	172715	105003	4873.29	63206	36036.5	19162.9	21336.4	108815	46076.9	34596.6	28714.7	54917	19839	40209.3	28411.2	112521	34820.2	65516.4	60809.3
0	1.17601	33509.6	P47911	Rpl6	60S ribosomal protein L6	11146808	10344579	9602065	9087979	9451990	9441134	9126100	8979281	10734779	9973127	12303296	10918640	9826793	8597618	9614709	8513776	10288259	10409855	9232072	9415831
0	1.17103	17587	P47915	Rpl29	60S ribosomal protein L29	3017029	2.731e+06	2.96541e+06	2.74314e+06	2.73817e+06	2.24588e+06	2.22905e+06	2.74915e+06	3.55497e+06	3.42878e+06	3.85317e+06	4.10446e+06	3.38938e+06	2.98971e+06	3.08953e+06	2624266	3.56318e+06	3.70812e+06	3.11774e+06	3334425
0	1.1358	70839.7	P47934	Crat	Carnitine O-acetyltransferase	425953	399312	437855	244620	164924	157945	176655	166550	225614	211320	263119	333683	340487	459795	287717	283019	318193	247371	260072	299834
0	1.09322	33830	P47941	Crkl	Crk-like protein	465831	473703	334853	344818	341384	328397	352021	406948	399689	402881	393864	365881	315150	329072	291372	362482	190566	196405	269810	276400
0	1.02175	11474.9	P47955	Rplp1	60S acidic ribosomal protein P1	56240.7	262389	59652	61189.2	105141	110481	452585	359447	37244.2	19636.9	235335	81253.5	101401	86155.9	61359.7	173990	25764.4	17164.7	91294.7	164568
0	1.16309	34400.6	P47962	Rpl5	60S ribosomal protein L5	4.55398e+06	4.26682e+06	3780017	3.67325e+06	3.76413e+06	3.89491e+06	3.22664e+06	3.84186e+06	4.85012e+06	4434950	5.42834e+06	5.0084e+06	4.52238e+06	3.96668e+06	3.73431e+06	3.64728e+06	4.64605e+06	4614577	4.15596e+06	4201079
0	1.16295	24305.5	P47963	Rpl13	60S ribosomal protein L13	1.52329e+06	1.33434e+06	1.875e+06	1.61908e+06	1.4671e+06	1065892	1.66341e+06	1.70504e+06	2.33318e+06	1856651	3.07467e+06	3339237	2186067	1.64884e+06	1624064	1389309	2.31114e+06	2.05718e+06	1938099	2.57179e+06
0	1.18493	12215.5	P47964	Rpl36	60S ribosomal protein L36	2.96479e+06	2.23827e+06	3.13922e+06	2.74452e+06	3.2451e+06	3.11677e+06	2.94061e+06	3.15979e+06	4.34996e+06	3707779	4.93625e+06	5415822	4.20374e+06	3037023	1.78961e+06	1933091	3.68733e+06	3.47499e+06	2.8811e+06	3.18065e+06
0	1.13453	12746.5	P48024	Eif1	Eukaryotic translation initiation factor 1	277465	277056	225154	216389	166550	179457	157614	98881.2	138725	131856	139505	110703	133501	109400	141243	152537	135944	123635	151658	142125
0	1.19517	35752.4	P48036	Anxa5	Annexin A5	5815756	5.40219e+06	4646990	4.67729e+06	5130898	4.79938e+06	4267353	4.62253e+06	25276152	24303286	30457390	28825996	14039618	12460720	9164240	10583387	5.921e+06	6226158	5230553	7123540
0	1.15884	95911.2	P48193	Epb41	Protein 4.1	5.18039e+06	5.09609e+06	6.11352e+06	4623573	3.50134e+06	3.18943e+06	3.89153e+06	3.01071e+06	3.2154e+06	3.63061e+06	2891942	3.68031e+06	2.78272e+06	2.93542e+06	3.2e+06	3.199e+06	3.43675e+06	3.37014e+06	3.46399e+06	4407660
0	1.10206	81858.9	P48410	Abcd1	ATP-binding cassette sub-family D member 1	172185	139912	167436	123073	81163.7	52494.9	65984.6	107379	93627.5	91133.7	111928	121422	71325.4	190305	121815	140737	61642.7	55076.5	77673.3	72158.7
0	1.14883	12757.7	P48428	Tbca	Tubulin-specific chaperone A	570753	558363	525802	497900	446275	536028	421635	333452	654990	590514	593013	487861	556039	642734	521480	423543	537896	498714	465133	383468
0	1.09357	83126.2	P48437	Prox1	Prospero homeobox protein 1	31546.8	31207.2	32309.4	29535.2	21345.8	35213.3	30682.6	25527.1	23436.4	31179.3	18399.5	29476.5	13253.3	10364.2	9744.11	18400	19737.8	22995	18028.7	24672
0	1.06594	71254.4	P48441	Idua	Alpha-L-iduronidase	21647.9	23567.4	16346.4	10443.6	9319.01	8373.46	9779.77	4300.6	20128.3	33350.7	21880.6	20386.7	7385.51	8510.26	14005.7	10615.5	8363.66	10286.7	14693.8	8083.84
0	1.06671	59173.49;58643.79	P48453;P63328	Ppp3cb;Ppp3ca	Serine/threonine-protein phosphatase 2B catalytic subunit beta isoform;Protein phosphatase 3 catalytic subunit alpha	301082	229848	228436	208980	213260	227847	238257	208048	484647	503628	576476	556279	389453	343195	284368	302885	394720	312949	314808	339381
0	1.17115	74237.6	P48678	Lmna	Prelamin-A/C	1.12721e+06	1.01082e+06	2013346	1.74634e+06	928181	966425	1.56446e+06	1631315	1.22438e+06	1.21121e+06	3.53736e+06	3830995	980066	887409	1.6377e+06	1.4976e+06	1.17385e+06	959496	1.80305e+06	1.88879e+06
0	1.12013	94382.1	P48722	Hspa4l	Heat shock 70 kDa protein 4L	171352	184444	186232	209614	228800	236499	205312	228273	254571	255355	286441	218855	249318	216925	272757	309895	188012	144965	150313	161581
0	1.18625	30641.2	P48758	Cbr1	Carbonyl reductase [NADPH] 1	6847954	5993599	7.22356e+06	7.53854e+06	7186708	7.14646e+06	6611211	6.62389e+06	15661062	15814869	19231168	17353422	12658987	12064982	10338471	10232437	7010067	7.47044e+06	6479774	8665795
0	1.18424	9290.88	P48771	Cox7a2	Cytochrome c oxidase subunit 7A2, mitochondrial	13070271	15713090	12668211	13743877	15728679	18120326	14520301	13086688	10038455	9359229	9051770	9816588	12532436	13792296	12294540	14356354	11347986	12796785	14636056	16100925
0	1.15712	26634.9	P48774	Gstm5	Glutathione S-transferase Mu 5	342229	383179	385229	347374	356870	380608	319407	277930	816225	798847	861862	748772	507328	477987	448960	553494	439387	405745	347032	434639
0	1.15556	47756.4	P48776	Tdo2	Tryptophan 2,3-dioxygenase	789622	509165	1.35398e+06	349552	807051	919595	908056	595807	380911	525208	424400	338630	538177	711782	718900	865985	520766	673076	759792	989288
0	1.15046	32904.3	P48962	Slc25a4	ADP/ATP translocase 1	6751621	6543274	8347007	6694142	6.42301e+06	7.72299e+06	7570040	7534493	18209098	20018558	17292884	18440870	10277485	8366393	5709299	6763470	12341537	4.25613e+06	8763241	7.12714e+06
0	1.1454	54496.7	P49182	Serpind1	Heparin cofactor 2	116958	83935	125655	183119	227844	208271	200678	209575	217583	256512	215252	208660	166940	165246	197383	189200	150880	158686	194084	182918
0	0.99125	76755.7	P49222	Epb42	Protein 4.2	13467.7	10175.3	19752.5	13806.7	9502.75	9935.09	17419.7	11669.5	5351.98	5647.82	4760.69	11647.2	5844.55	15454.1	1357.28	6788.44	8468.86	12712.4	2114.08	4872.98
0	1.15425	34196.2	P49312	Hnrnpa1	Heterogeneous nuclear ribonucleoprotein A1	1.32041e+06	1.30625e+06	1.31737e+06	970407	781234	867246	984620	940124	1.88268e+06	1.68429e+06	2.02788e+06	1.95871e+06	1.09054e+06	870176	901087	1.06136e+06	908847	857808	920832	1.03776e+06
0	1.21043	45054.2	P49429	Hpd	4-hydroxyphenylpyruvate dioxygenase	20159482	19874666	23419572	22786184	20536720	22735592	22513854	21723322	13331031	16148641	9839058	12226559	18025582	22592078	17084728	21666364	17815614	16651926	18521884	21275532
0	1.14382	43346.2	P49442	Inpp1	Inositol polyphosphate 1-phosphatase	296580	332582	241483	293562	328517	289965	360833	260649	377603	443510	422610	489321	460208	412095	349513	357493	387459	404063	438470	346465
0	1.14908	42432.7	P49443	Ppm1a	Protein phosphatase 1A	612300	523289	472961	552197	576395	577664	498091	440107	685988	645198	661712	670836	653402	715920	594541	620067	704131	703304	713628	668594
0	1.13472	41666.9	P49586	Pcyt1a	Choline-phosphate cytidylyltransferase A	204290	181841	171798	260579	305065	289824	248597	290472	311048	303386	331095	367062	285562	326625	299200	311012	252975	240896	235069	246572
0	1.09859	33288.5	P49615	Cdk5	Cyclin-dependent kinase 5	158502	124439	142004	147952	157292	142726	145015	138374	106961	161261	131503	173450	146872	148880	139414	155317	104887	128990	106713	126281
0	1.10802	52683.5	P49698	Hnf4a	Hepatocyte nuclear factor 4-alpha	204263	185021	308743	146927	203198	247819	236106	172775	113123	96757.3	120531	107450	108691	125153	48271.7	145010	85859	101516	118059	124397
0	1.08273	54240.2	P49710	Hcls1	Hematopoietic lineage cell-specific protein	47635	61941.8	41610.8	50342.8	43836.1	38932.7	36470.1	40419.1	157269	179880	189141	185551	63932.9	51205.2	29618.3	49650.9	30133.3	33720.6	26465.4	40133.9
0	0.969405	96736.2	P49717	Mcm4	DNA replication licensing factor MCM4	21213.8	24265.8	25084.8	27346.1	20148.7	12979.4	20557.1	12036.1	26582.3	6183.97	31880.4	7042.11	15501.2	9793.43	10152.1	12026.7	6196.62	9301.2	9911.14	7814.2
0	1.08217	82406.8	P49718	Mcm5	DNA replication licensing factor MCM5	22069	44146.4	23167	34499	26778.5	15409.1	25557.9	17452	292176	125819	298671	154061	77926.2	63406.3	48322.7	44140	20445.7	14049.6	14431.4	26428.1
0	1.19325	25926.6	P49722	Psma2	Proteasome subunit alpha type-2	1.85793e+06	1810982	1614064	1.77118e+06	1712628	1652963	1669780	1.83264e+06	2.47414e+06	2.32669e+06	2.45766e+06	2412388	2246420	2.07952e+06	1.83806e+06	1.74585e+06	2.06472e+06	2.20254e+06	1.93352e+06	1.92163e+06
0	1.10049	20538.7	P49817	Cav1	Caveolin-1	37088.1	13747.9	22746.7	21439.9	26590.8	15628	17197.8	33993.8	23081.4	40202.3	14993.5	10652.6	64447.6	18964.4	13053.7	11476.4	96098	6709.72	96818.4	25533.5
0	1.16487	37170.3	P49935	Ctsh	Pro-cathepsin H	1.25933e+06	1.40145e+06	1231299	1.35975e+06	1.41373e+06	1.21183e+06	1.19058e+06	1.27488e+06	1.42707e+06	1.65975e+06	1.4219e+06	1.71272e+06	1.18149e+06	915627	1.0648e+06	1.02353e+06	1.26795e+06	1.30987e+06	1.27915e+06	1.14257e+06
0	1.12456	10193.9	P49962	Srp9	Signal recognition particle 9 kDa protein	582144	650662	542217	389138	495024	479314	442104	471076	272180	260553	315454	315175	338212	380007	233532	279604	278473	303204	209551	236205
0	1.17229	50370.7	P50136	Bckdha	2-oxoisovalerate dehydrogenase subunit alpha, mitochondrial	2.36804e+06	2.65562e+06	2492254	2.37076e+06	2.84452e+06	2.80235e+06	3028735	3.27719e+06	3.00625e+06	3098337	2.4461e+06	2722326	3013607	3361260	3.04849e+06	2.90341e+06	3.32542e+06	3.05167e+06	3164363	3.25809e+06
0	1.16849	26588.3	P50171	Hsd17b8	(3R)-3-hydroxyacyl-CoA dehydrogenase	4871444	4.88176e+06	4794225	3982852	3.88755e+06	4415778	4.35709e+06	4347454	5.27106e+06	5422746	4.83318e+06	5.35977e+06	4.8235e+06	4.63359e+06	4516261	4.42319e+06	5.28054e+06	4.95315e+06	5.3704e+06	5444426
0	1.18648	32364	P50172	Hsd11b1	11-beta-hydroxysteroid dehydrogenase 1	10660905	9355989	9184788	11746796	12673422	10663491	13091325	10736523	8898842	8.3834e+06	6240493	7816715	8.1875e+06	9611258	11321388	9957546	10347401	10897834	12377997	11081430
0	1.19799	47688.2	P50247	Ahcy	Adenosylhomocysteinase	69822528	64431628	72093152	83451632	81483896	77782672	75301600	79482704	60633320	63773736	43900508	55751292	71544376	81523776	59477128	76229488	78829272	81104760	75494128	78330232
0	1.16539	59914.5	P50285	Fmo1	Dimethylaniline monooxygenase [N-oxide-forming] 1	1.60881e+06	1.52256e+06	2.01634e+06	2879637	2557889	2.89054e+06	2.67349e+06	2.76453e+06	4353500	4.42268e+06	4.04156e+06	5201391	3682312	4.26536e+06	3.92862e+06	4129436	2787769	2.64007e+06	2.86533e+06	2573009
0	1.15103	33701.4	P50295	Nat2	Arylamine N-acetyltransferase 2	333895	303822	313593	322992	342649	329320	379178	305977	306159	325648	326910	383505	305369	291366	309975	275956	341012	336676	321124	313622
0	1.19231	50521.6	P50396	Gdi1	Rab GDP dissociation inhibitor alpha	1.06502e+06	1.11584e+06	1.13586e+06	1.15321e+06	1.14343e+06	1.24765e+06	1.3269e+06	1.37468e+06	1.30859e+06	1.30755e+06	1.25561e+06	1.27733e+06	1.17704e+06	1.03312e+06	1.01227e+06	1.0317e+06	1.19437e+06	1.26448e+06	1.22513e+06	1227253
0	1.14628	66590.8	P50427	Sts	Steryl-sulfatase	344701	371871	324559	297616	266067	205478	279288	283368	528863	601010	597052	567056	291026	209057	261510	197235	252292	242849	241472	341360
0	1.10203	53748.2	P50428	Arsa	Arylsulfatase A	78725.1	75776.9	54289.2	52624.8	41470.5	48804	42950.3	49548.7	70382.2	73122.5	73963.4	69352.4	57003.8	45446.1	73829	53401.7	64034.3	56857.6	60837.9	55205.6
0	1.13747	59647.1	P50429	Arsb	Arylsulfatase B	293764	340724	321678	387871	264174	273640	298070	269733	258276	256540	284129	244764	271555	227555	278356	210347	506309	509386	464944	354585
0	1.17689	52600.9	P50431	Shmt1	Serine hydroxymethyltransferase, cytosolic	5.9741e+06	5.45073e+06	5918737	8150653	8555459	9286583	8446667	8884738	5585198	5.43644e+06	4.94155e+06	4755243	7.0183e+06	8003961	5.96145e+06	7520346	7915731	8300157	7508088	7131306
0	1.14937	59335.12;60322.25	P50446;Q9Z331	Krt6a;Krt6b	Keratin, type II cytoskeletal 6A;Keratin, type II cytoskeletal 6B	438520	5.32369e+06	425551	177952	278540	228425	466416	440908	206964	642135	1.04953e+06	279419	239915	436190	194252	318243	454012	281472	520945	193994
0	1.13426	20894.8	P50462	Csrp3	Cysteine and glycine-rich protein 3	158197	168843	194692	158032	160180	185637	191312	248102	58068.6	63953.2	68267.4	78216.2	116362	121416	116807	146032	111473	124008	111752	100383
0	1.17033	68326.1	P50516	Atp6v1a	V-type proton ATPase catalytic subunit A	1.66564e+06	1.84231e+06	1.66074e+06	1.70483e+06	1.58738e+06	1798169	1.88499e+06	1.77773e+06	2697375	3.15807e+06	3.06425e+06	2.89318e+06	1.99401e+06	1.98595e+06	1.89243e+06	1.82989e+06	1.6558e+06	1610145	1497953	1.76989e+06
0	1.1491	26157.4	P50518	Atp6v1e1	V-type proton ATPase subunit E 1	526524	560121	561777	490375	463427	392951	550212	386731	875547	1.03873e+06	1.0968e+06	940007	693741	695441	604937	599423	475936	562844	511636	618476
0	1.14921	11082.7	P50543	S100a11	Protein S100-A11	200190	158871	74518.6	79350.1	95102.7	121381	129809	202148	1.25445e+06	1.15676e+06	1.55246e+06	1.5859e+06	347262	251989	153326	146075	130599	115074	116758	121966
0	1.19543	70875.5	P50544	Acadvl	Very long-chain specific acyl-CoA dehydrogenase, mitochondrial	5.59832e+06	5.41875e+06	5264832	3856723	3.37518e+06	3539350	3.43558e+06	3.59879e+06	3841844	3.55665e+06	3.21193e+06	3.92048e+06	3.51129e+06	3.50971e+06	3878431	3.02365e+06	3.81559e+06	3.6447e+06	3622634	3.92703e+06
0	1.17066	43698.8	P50580	Pa2g4	Proliferation-associated protein 2G4	3374670	3.23156e+06	2.92715e+06	2.95929e+06	2.82347e+06	2.90669e+06	2.63985e+06	2.4757e+06	2819018	2.63825e+06	2.88448e+06	2.87935e+06	2530690	2333090	2.52728e+06	2.37738e+06	2.76228e+06	2986304	2.7163e+06	2.87761e+06
0	1.12559	18840.8	P50637	Tspo	Translocator protein	293291	181720	312275	187956	221821	208384	224864	196543	213526	240430	180377	208413	121594	196344	262632	217115	189400	128365	205587	202526
0	1.16701	84921.7	P51125	Cast	Calpastatin	281929	297689	219134	191443	210968	179634	214207	175371	448056	424840	443854	490715	320434	260109	178632	244703	252025	236721	199880	234253
0	1.15409	23489.7	P51150	Rab7a	Ras-related protein Rab-7a	1.16213e+06	1.1047e+06	949580	1.09071e+06	1.16449e+06	1.09258e+06	1.14243e+06	1.22164e+06	1.53693e+06	1.52816e+06	1.60923e+06	1802053	1.2194e+06	1.08021e+06	1.12673e+06	954431	1.05356e+06	1.06092e+06	992176	1.03721e+06
0	1.08549	28503.9	P51163	Uros	Uroporphyrinogen-III synthase	352327	361537	441484	433612	348278	220845	158949	177602	185997	289320	221020	373040	76085.8	203718	110920	258194	54456.7	73374.3	110741	153603
0	1.18616	47907.9	P51174	Acadl	Long-chain specific acyl-CoA dehydrogenase, mitochondrial	8442215	8815633	8551601	6728145	6.25894e+06	6.39727e+06	6.49889e+06	5786500	7.29092e+06	7114567	6.06816e+06	6804356	6938149	8.0508e+06	7896529	7.51619e+06	7.69817e+06	6.91847e+06	8081447	7.91731e+06
0	1.07455	50870.6	P51175	Ppox	Protoporphyrinogen oxidase	77836.2	76937.9	87889.3	48018.9	64526.7	65461.7	74849	83904.8	74877.7	82986.7	79230	69720	86925.7	72438.8	87678	54264.7	80395.8	69322.7	79744.1	76583.2
0	1.16802	21881.4	P51410	Rpl9	60S ribosomal protein L9	1.83843e+06	1.74059e+06	1.9274e+06	1.81871e+06	1.86437e+06	2.16493e+06	2.04375e+06	2.18071e+06	1.853e+06	1.76402e+06	2.0104e+06	2.01667e+06	1.82641e+06	1663678	1832327	1730533	1.78926e+06	1.95482e+06	1.88416e+06	1.98753e+06
0	1.05905	19453.4	P51437	Camp	Cathelicidin antimicrobial peptide	15733.1	12789.3	15362.3	21325.6	13476.3	23855	14211.3	25827.4	17103.2	9050.61	24992.1	39091.9	28813.5	12581.5	16256.1	11252.8	2204.61	14174	16870.3	14461.8
0	1.15887	41835.8	P51658	Hsd17b2	Estradiol 17-beta-dehydrogenase 2	750263	952746	750420	1.05841e+06	1.404e+06	1494841	1.53931e+06	1.46651e+06	778562	758499	834855	788725	771606	569892	1113722	964250	944335	1.01833e+06	1.13569e+06	741906
0	1.17999	79481.8	P51660	Hsd17b4	Peroxisomal multifunctional enzyme type 2	19509932	18817950	16700168	12941072	10151250	11190118	10861648	11110970	8.29943e+06	8452899	10351354	10879656	12219592	15135983	12597458	12862395	11010001	11474974	11045824	10539561
0	1.16321	52246.6	P51855	Gss	Glutathione synthetase	792878	780846	707075	788974	863244	896382	1.00406e+06	942032	1.86784e+06	1.9243e+06	2.04978e+06	1960910	1.14031e+06	950848	888214	1.00594e+06	825112	808250	751063	884322
0	1.16854	26268.7	P51859	Hdgf	Hepatoma-derived growth factor	1.21415e+06	1.11731e+06	1.12221e+06	924812	941177	908451	870837	899557	1071613	1100836	1.0712e+06	1.11417e+06	909128	832342	805688	829460	1.02576e+06	996495	884586	1.1016e+06
0	1.15319	40301.1	P51863	Atp6v0d1	V-type proton ATPase subunit d 1	508108	463383	441262	448617	501715	588269	511689	566941	574091	588125	637980	601179	403812	396772	413861	420908	474981	556174	534185	511298
0	1.12357	14893	P51880	Fabp7	Fatty acid-binding protein, brain	52067.5	48999.8	33779.3	29441.4	34984.4	41540	27721.3	40826	204698	267789	224897	237972	65648.6	42283.5	51132	46402.1	33744.1	42636.6	25933.7	44464.7
0	1.2025	32931.3	P51881	Slc25a5	ADP/ATP translocase 2	30784594	30764998	35704196	28798678	30541828	29806494	29496026	26778508	48157344	49144084	47384952	51086112	44718420	42506908	36629120	36296804	34693660	35574728	33053348	36316588
0	1.13609	38265	P51885	Lum	Lumican	528403	470890	492871	424429	429945	370352	428676	580171	626785	745448	855580	864764	516047	441489	290379	360773	587089	243168	709226	483719
0	1.08824	21529.8	P51910	Apod	Apolipoprotein D	161705	211230	139862	167328	113327	126975	132921	20748.8	145593	233240	174887	219611	46344.5	47450.5	59255.2	94527.8	51875.4	40838.4	79974.3	83855.3
0	1.0621	63769.9	P52019	Sqle	Squalene monooxygenase	50828.8	122179	84920.8	147657	73932.2	91909.6	59416.4	109193	117278	132547	96866.1	110922	71840.9	122482	9878.9	35897.5	67047.5	63200.9	55186.3	63629.5
0	1.19246	33465.9	P52196	Tst	Thiosulfate sulfurtransferase	15083807	16394248	15167257	12500739	14945555	15040867	15036496	14493851	12823702	13465365	10419313	12214076	14820219	15802176	15123426	14371667	17228696	16186164	16461180	16068564
0	1.19379	39565.2	P52430	Pon1	Serum paraoxonase/arylesterase 1	2951664	2.57738e+06	2.86544e+06	4.3721e+06	6657912	6972514	7533923	7174718	5.39895e+06	6393032	5.72928e+06	6.25424e+06	6632325	7206943	6620107	6.0648e+06	6.55938e+06	5.4261e+06	6205361	4572942
0	1.13947	87022.1	P52479	Usp10	Ubiquitin carboxyl-terminal hydrolase 10	274928	272528	256809	227601	236269	253820	247610	192481	310453	259047	361241	292013	333132	343207	326259	319176	292496	326254	324427	262621
0	1.15519	57844.9	P52480	Pkm	Pyruvate kinase PKM	1.13558e+06	1.26876e+06	955654	790292	759064	775962	558222	896829	3.47898e+06	4.02054e+06	3.51028e+06	3.79128e+06	1.44348e+06	1.04214e+06	1.01193e+06	1.07697e+06	1.03112e+06	802557	694774	977210
0	1.1454	13019.8	P52503	Ndufs6	NADH dehydrogenase [ubiquinone] iron-sulfur protein 6, mitochondrial	888593	900698	858622	574760	804953	712616	639728	777800	1.12045e+06	984509	1.06804e+06	1.00417e+06	1.17764e+06	1.32198e+06	985568	665606	1.17009e+06	1.25776e+06	1.19977e+06	1.23129e+06
0	1.04819	34086.1	P52624	Upp1	Uridine phosphorylase 1	6314.26	13788.5	12312.1	18480.6	22784.8	11237.5	24348.6	9208.4	62716	58067.4	46570.8	55835.7	45081.3	37125.9	31534	20827.5	32178.3	24361.8	14241.6	17982.7
0	1.20117	14255.4	P52760	Rida	2-iminobutanoate/2-iminopropanoate deaminase	38086012	37044008	35389676	41239884	40350056	35573096	29967400	33072430	49323768	49023648	41832648	43847856	42537168	40697808	36837620	34826744	50644404	49304228	42505028	55848708
0	1.15133	52088.5	P52792	Gck	Hexokinase-4	719075	708672	778942	1.28075e+06	1.15467e+06	1.25117e+06	1.21959e+06	958649	1.40521e+06	1.31702e+06	1.49976e+06	1.64978e+06	1.37487e+06	1.71834e+06	1.1401e+06	1.32382e+06	1.08998e+06	1.35392e+06	1103475	1.06279e+06
0	1.1668	73980.5	P52825	Cpt2	Carnitine O-palmitoyltransferase 2, mitochondrial	4.25669e+06	4.3234e+06	4381677	3.84934e+06	2.86786e+06	3.0806e+06	3.00499e+06	3.05083e+06	2.79694e+06	2.72834e+06	2308759	2.97094e+06	3.11933e+06	3.83403e+06	3.75471e+06	3.32075e+06	3662568	3265110	3.55588e+06	3.46724e+06
0	1.17701	33974.5	P52840	Sult1a1	Sulfotransferase 1A1	3.19839e+06	3.2773e+06	4.80006e+06	4.84294e+06	3.56692e+06	3.12428e+06	3109983	4.1053e+06	7.31156e+06	8512013	6716818	7038048	3.82042e+06	4575266	3.40762e+06	3625788	2.83232e+06	2.99044e+06	2.73328e+06	4.33989e+06
0	1.17466	24916.4	P53026	Rpl10a	60S ribosomal protein L10a	7.08185e+06	6.59086e+06	7.25422e+06	6.54617e+06	6848116	6442919	6.24517e+06	5.86563e+06	6915178	6.66781e+06	8386851	7.54849e+06	6.9588e+06	6.31732e+06	5851597	6.27596e+06	6.50116e+06	7.04598e+06	6448702	6.42113e+06
0	1.17228	53246.5	P53395	Dbt	Lipoamide acyltransferase component of branched-chain alpha-keto acid dehydrogenase complex, mitochondrial	7111489	7.96646e+06	7498704	6859602	7081763	7.07286e+06	7.71816e+06	6.80509e+06	7155157	7744540	5501985	6.70172e+06	6.76912e+06	7046814	7.15169e+06	6858882	8527812	8.15288e+06	8417314	10084871
0	1.08537	37803.3	P53612	Rabggtb	Geranylgeranyl transferase type-2 subunit beta	102574	107108	97419.1	112318	125987	118048	128236	136660	121487	109643	127286	119410	126717	116311	106205	99618	93616.2	89472.7	86713.1	85298
0	1.18029	62308.7	P53657	Pklr	Pyruvate kinase PKLR	7483764	6339288	7.15158e+06	7441138	10023116	8644385	8711739	7.64767e+06	7.2809e+06	5161064	7.12307e+06	4126889	9033979	9659277	8439972	8252641	6295854	7.09061e+06	6614900	4.30581e+06
0	1.13281	30977.6	P53702	Hccs	Holocytochrome c-type synthase	121578	129620	127198	89732.8	93957.8	110969	113857	90096.1	83396.4	103267	95088.7	98979.4	114812	118900	118729	106507	90622.9	106888	111815	109288
0	1.14776	48154.3	P53798	Fdft1	Squalene synthase	627335	807770	610848	637598	255559	468914	187350	393073	148534	139602	255422	260105	325880	633851	78190.6	278360	396587	325027	237985	398886
0	1.15072	24785.3	P53808	Pctp	Phosphatidylcholine transfer protein	1.78793e+06	1.80187e+06	1.35806e+06	1.115e+06	974575	995899	822102	826229	1.29316e+06	1.21288e+06	1.27752e+06	1.23032e+06	1.3664e+06	1801956	1.10922e+06	1.46116e+06	1.36109e+06	1.26807e+06	1274754	1.12487e+06
0	1.15526	31893.4	P53810	Pitpna	Phosphatidylinositol transfer protein alpha isoform	226484	237734	217757	207675	204409	206169	215091	231023	312409	333048	330728	337967	208271	190589	194103	211660	173609	162494	161427	188370
0	1.15522	31487	P53811	Pitpnb	Phosphatidylinositol transfer protein beta isoform	988903	910616	928629	1.06672e+06	1.16534e+06	1.19266e+06	1.19443e+06	1.10795e+06	1050204	1.00075e+06	1.04451e+06	956140	997464	1.07137e+06	1.06985e+06	1.12498e+06	932900	999700	1.01555e+06	1.01906e+06
0	1.12413	53267.2	P53986	Slc16a1	Monocarboxylate transporter 1	634142	677354	688698	546105	454436	541801	574462	422496	439837	389316	365772	333979	418987	409404	579418	521802	354340	319196	376490	372338
0	1.16218	23547.5	P53994	Rab2a	Ras-related protein Rab-2A	913931	779288	696334	739221	736687	736374	810681	823719	1.08644e+06	1052065	1.25615e+06	1.21509e+06	956602	752948	910430	847185	841953	744577	834257	752943
0	1.15457	19591.8	P53996	Cnbp	CCHC-type zinc finger nucleic acid binding protein	1.85115e+06	1.898e+06	2.3295e+06	1.71121e+06	1.73495e+06	1.59337e+06	1.58605e+06	1.66434e+06	1.64655e+06	1616054	1.75003e+06	1.59586e+06	1.63849e+06	1.72411e+06	1.34159e+06	1.32612e+06	1.55541e+06	1.72303e+06	1.38897e+06	1649954
0	1.17401	50906.2	P54071	Idh2	Isocitrate dehydrogenase [NADP], mitochondrial	4301483	4555257	4838295	4306825	4556706	4428517	4684075	4396581	7.35098e+06	8.09428e+06	6.33354e+06	6.8724e+06	6707643	7062484	7266191	6528234	5159909	4.59109e+06	4.92453e+06	5.65978e+06
0	1.09424	71721.8	P54103	Dnajc2	DnaJ homolog subfamily C member 2	24603	28061.4	25249.4	23423.2	20583.4	20420.8	22457	20692.9	26542.5	26319.8	30390.7	28371.1	22275.6	24043.6	19118.8	21745.6	21763	21766.8	17521.8	19978.8
0	1.15739	31375.3	P54116	Stom	Stomatin	171892	182061	196768	215724	235522	210816	248050	257108	463408	494502	593472	556363	276236	235742	281020	300412	179977	191362	203078	244847
0	1.15048	17274.5	P54227	Stmn1	Stathmin	53686.8	35354.9	29689.2	35412.3	37452.7	53400.4	28440.9	41393.2	424381	124156	360900	165835	125263	168706	113853	88573.5	33211.9	25530.8	26468.5	34622.3
0	1.16856	43512.6	P54728	Rad23b	UV excision repair protein RAD23 homolog B	819364	801392	712625	773243	800348	864054	766734	736985	886787	850622	833834	815466	817980	810793	780964	858129	742821	716044	727468	691206
0	1.0984	70306.5	P54729	Nub1	NEDD8 ultimate buster 1	61126.9	65597.2	56235.9	54506.7	35342.3	34241.1	27409.6	30637.7	36669.2	38049.6	33991.8	28835.4	36128.5	39704.2	32286.6	51794.6	40081	45414.6	45412.8	50070.4
0	1.12631	73863	P54731	Faf1	FAS-associated factor 1	192843	139071	122896	141148	108751	141234	111765	109529	241171	237553	235180	219752	199876	162293	154635	157044	166627	168533	182479	174711
0	1.06283	39072.9	P54751	St3gal1	CMP-N-acetylneuraminate-beta-galactosamide-alpha-2,3-sialyltransferase 1	99139.9	110611	86821	86248.7	54581.9	86727.5	62004.3	60586.9	83079.8	86956.9	84697.6	52712	26089	41598.3	33748.6	54552.1	35213.7	62398.1	50274	58133.2
0	1.14977	47408.3	P54775	Psmc4	26S proteasome regulatory subunit 6B	798646	771879	749176	793894	747155	794002	672187	732981	804133	778834	801866	780293	821201	830208	722421	767595	666800	686688	671776	706947
0	1.10042	30946.9	P54797	Tango2	Transport and Golgi organization 2 homolog	174233	207708	222323	148581	180395	157544	224577	179429	215839	299864	215268	255102	211360	264054	217599	225458	157162	153959	158892	159862
0	1.14942	54866.2	P54822	Adsl	Adenylosuccinate lyase	404885	358842	383278	401380	454174	463924	427939	454918	534981	548251	495549	503282	460382	428884	409147	424708	439378	410658	390449	441839
0	1.1133	54191.6	P54823	Ddx6	Probable ATP-dependent RNA helicase DDX6	180311	174415	167038	111794	137477	108349	88741.8	138677	176098	181819	144141	183803	165998	139382	119333	92005.5	159165	173525	146098	178451
0	1.20938	56822.8	P54869	Hmgcs2	Hydroxymethylglutaryl-CoA synthase, mitochondrial	99051880	90991896	93900088	70378880	59275420	57668512	51592160	63696128	57243904	44168008	49432572	73968752	64885744	81527624	61396096	47582432	71360208	63306556	61127228	52912732
0	1.16692	15126.2	P55050	Fabp2	Fatty acid-binding protein, intestinal	2316018	2.20475e+06	2.06646e+06	1.6847e+06	1.67265e+06	1.87593e+06	1.7503e+06	1.49174e+06	1.53735e+06	1.21409e+06	1.36788e+06	1.55081e+06	1795907	2.3365e+06	1.97678e+06	2.34624e+06	1.56969e+06	1.93189e+06	1.57691e+06	1.36411e+06
0	1.18484	75474.6	P55096	Abcd3	ATP-binding cassette sub-family D member 3	4503561	4304714	4.61073e+06	3.58031e+06	2738980	3.3516e+06	3.01838e+06	3.19838e+06	1.6045e+06	1.54103e+06	2.08962e+06	2.00707e+06	3.17776e+06	3.73441e+06	3.61945e+06	4.17544e+06	3.10657e+06	2.98888e+06	3.32521e+06	2.76956e+06
0	1.13567	23668.2	P55258	Rab8a	Ras-related protein Rab-8A	337225	301947	196115	190639	151033	132124	156678	120205	248517	237771	143787	196423	248576	186835	149309	162002	125620	128565	5864.83	106237
0	1.18145	40148.8	P55264	Adk	Adenosine kinase	11542606	10962665	11677194	12924359	10437098	11393410	11425836	11294342	13410321	13890002	12134237	13032179	11347648	11793175	10869013	11899576	10984556	12116981	10873698	11791322
0	1.07418	99961.4	P55292	Dsc2	Desmocollin-2	67703.8	41332.9	74358.1	36655.6	36553.3	57789.2	72839.9	48120.9	37995.5	61780.9	70902.8	63954.4	53345	33856.6	60785.7	70768.2	47165.4	41377.1	84104.4	92172.6
0	1.14092	42215	P55302	Lrpap1	Alpha-2-macroglobulin receptor-associated protein	295742	269943	286471	281106	359739	340326	353107	323336	399355	369658	401957	440164	464322	443842	461385	377357	418377	499459	411726	487637
0	1.01839	167220	P55937	Golga3	Golgin subfamily A member 3	55395.2	39120.3	22368.4	40171.5	23860	35820.4	42089.5	20993.4	22561.6	39911.2	35861	26544.2	26026.5	14700.4	13058.4	25664.7	6976.87	22335.1	20068.6	17520.7
0	1.1817	10344.2	P56135	Atp5mf	ATP synthase subunit f, mitochondrial	11467081	10979443	12348653	10681083	14845344	9560002	11422882	15123669	14466171	13600421	12745967	16198497	17247708	15602881	13200018	8740214	16490850	14164578	13489899	14965411
0	1.09798	12292.9	P56212	Arpp19	cAMP-regulated phosphoprotein 19	82615.7	106535	113284	78720.3	126761	92560.7	75874.4	97031.9	88594.6	142689	130077	78983.5	113255	145830	20944.7	69256	68743.6	94951.1	60132.4	62877.5
0	1.14893	22876.5	P56213	Gfer	FAD-linked sulfhydryl oxidase ALR	538038	639162	579689	545321	474168	536793	587048	606309	411426	486457	386922	390644	535906	504326	562976	525613	595570	514209	617014	557328
0	1.00433	24408.7	P56371	Rab4a	Ras-related protein Rab-4A	118521	119760	82796.4	114726	126433	93783.8	8802.68	110250	108420	113739	132815	144642	36557.9	48086.6	18987.2	67785.4	34138.4	85273	65452.9	52406.3
0	1.12432	11877.6	P56375	Acyp2	Acylphosphatase-2	67704.6	68588.9	55581.1	46681.6	34186.8	52375.7	20217	25467.3	80421.6	89687.8	81423.9	71208.6	42954.7	34210.7	39873.3	52512	35023.4	31754.2	34537.2	36870.1
0	1.11366	11240.7	P56376	Acyp1	Acylphosphatase-1	342494	285908	305065	257571	351485	233848	265495	230799	386363	373151	383434	354800	360396	421122	321800	342646	292981	280748	268493	276314
0	1.12931	6697.97	P56379	Atp5mpl	ATP synthase subunit ATP5MPL, mitochondrial	72087.2	94574.2	76941.4	25944.8	62739	42230.2	58810.3	26455.7	57892.2	71660.1	51677.6	144964	50244.7	37349.7	58007.8	37733.8	70986.2	51649.6	74476.5	59855.2
0	1.13339	16989.4	P56380	Nudt2	Bis(5'-nucleosyl)-tetraphosphatase [asymmetrical]	105438	120871	112219	107920	108598	124472	106823	97111.4	123577	126607	126007	128532	125859	135834	110392	123258	119707	120293	105368	120618
0	1.18777	5837.84	P56382	Atp5f1e	ATP synthase subunit epsilon, mitochondrial	6.20394e+06	6952432	8853265	7341534	8327119	7.45956e+06	8.00491e+06	8024643	6.57212e+06	7.33932e+06	5310300	5.43234e+06	7.19612e+06	7992857	7.21602e+06	7449181	8217773	7.52167e+06	7.9616e+06	7.81133e+06
0	1.11855	12957.6	P56387	Dynlt3	Dynein light chain Tctex-type 3	394284	287264	296926	368644	331138	291081	322307	238964	457817	438693	522129	427440	299626	433196	331083	358151	333567	370505	316342	336664
0	1.10357	16131.4	P56389	Cda	Cytidine deaminase	309766	291653	304939	228228	176756	179593	176218	163094	449025	390312	413911	397369	322260	301512	170220	207783	207317	201094	164862	208441
0	1.18195	10071.5	P56391	Cox6b1	Cytochrome c oxidase subunit 6B1	11454074	12161616	10905372	11311638	12901077	11522634	11867190	12844023	9939896	9180775	9195995	9965382	13475752	14135789	12006546	11707626	11426859	12594046	12606432	13702869
0	1.16967	9011.36	P56393	Cox7b	Cytochrome c oxidase subunit 7B, mitochondrial	3.84921e+06	4.07151e+06	4.19366e+06	4356677	4.86562e+06	5.09871e+06	5.09296e+06	4290944	2365636	2.66459e+06	2.09642e+06	2.15239e+06	2.64825e+06	3.51124e+06	3.9717e+06	4.16507e+06	2.33765e+06	2.85011e+06	3620165	3666092
0	1.14952	6784.01	P56394	Cox17	Cytochrome c oxidase copper chaperone	661643	825994	714377	330972	343274	283057	330281	432092	443944	390789	319100	368786	317858	381741	367787	375077	294036	263778	269541	333893
0	1.18776	15241	P56395	Cyb5a	Cytochrome b5	28380938	29728898	25977192	24672606	20707170	22618686	23594986	27050306	35184960	34049300	32094208	43312960	30232946	30407502	30292688	23863418	30225468	31445670	28644456	28051516
0	1.16654	95833.3	P56399	Usp5	Ubiquitin carboxyl-terminal hydrolase 5	812170	757945	837100	962656	949968	884647	982841	1.01093e+06	1.17738e+06	1.16543e+06	1.22978e+06	1.18693e+06	1.14861e+06	1.1052e+06	958924	974033	957403	987040	874489	926650
0	1.11864	27797	P56404	Aqp8	Aquaporin-8	97803.5	52252	6171.56	341740	376972	510406	419176	201916	562058	481268	895688	730749	803241	941680	645124	808499	697235	664951	555738	227389
0	1.21395	56300.5	P56480	Atp5f1b	ATP synthase subunit beta, mitochondrial	50762048	53647408	48814152	41172964	40228232	38133740	40447524	40049932	47996872	47769436	40722596	44663228	45581628	42956868	42371956	40208016	48884820	43096496	44948976	48562016
0	1.16503	34407.8	P56528	Cd38	ADP-ribosyl cyclase/cyclic ADP-ribose hydrolase 1	612243	641077	575491	528054	566392	529562	499437	671516	436508	476065	477680	491242	359346	394877	419187	430533	442287	431182	420743	457837
0	1.05506	38810.7	P56542	Dnase2	Deoxyribonuclease-2-alpha	58187.1	72528.9	50592.8	50569.7	41914.5	43010.2	41566.6	55729.8	111340	99070.6	100927	89570.6	33338.8	24486.5	41594.2	35547.5	50654.2	20124.3	48267.3	37302.3
0	1.07586	10504.8	P56565	S100a1	Protein S100-A1	39168.6	32067.9	51718.3	52707.7	40116.6	54452.3	57468.8	56382.9	49297.6	38629.2	37261	38627.3	28532.2	23952.9	31207.5	29447.9	36406.3	31910.5	30554.7	40477.7
0	1.20572	56179.2	P56593	Cyp2a12	Cytochrome P450 2A12	4.0898e+06	4651526	3.80049e+06	4.77418e+06	4726723	4.38298e+06	4.08235e+06	4.26677e+06	4.20617e+06	4368195	4657683	4733885	4346749	5065215	5455242	5.12774e+06	4.50995e+06	4825958	4990147	4281664
0	1.15126	55606.3	P56654	Cyp2c37	Cytochrome P450 2C37	574669	490473	669526	943846	1.12789e+06	1205123	1.29061e+06	1.35839e+06	539068	579454	227916	410208	752982	1153500	894730	812884	1.90536e+06	1.38382e+06	1.92724e+06	739423
0	1.15152	55763.5	P56657	Cyp2c40	Cytochrome P450 2C40	856021	889546	934160	1.39548e+06	2.03041e+06	1529491	1.59675e+06	1.6471e+06	809538	695981	728708	750399	1.27224e+06	1.11298e+06	1056695	990027	1.46505e+06	1.23448e+06	1428739	1248429
0	1.14711	14275.1	P56812	Pdcd5	Programmed cell death protein 5	319928	279049	255185	364343	380460	379463	360105	357307	445289	374896	455820	422872	399813	355336	388475	371769	363932	371376	354875	331182
0	1.10794	21336	P56873	Znrd2	Protein ZNRD2	249707	230085	217798	271257	193840	154568	79735.4	62214.3	131486	161993	216331	157946	239412	220235	157930	183711	215632	181583	154205	177372
0	1.15855	52673.1	P56959	Fus	RNA-binding protein FUS	1940111	2.00274e+06	2.08235e+06	1.25643e+06	1.00398e+06	1.33525e+06	1.48022e+06	1.40349e+06	1.53705e+06	1.6118e+06	1.71194e+06	1.71015e+06	867303	734170	712455	1.03176e+06	967232	957878	1.03433e+06	1113584
0	1.12272	78492	P57716	Ncstn	Nicastrin	216339	223242	208806	192772	171363	183805	165852	151689	299457	351137	358269	324667	186770	155457	203483	164204	150010	168584	175027	193048
0	1.11718	28369	P57746	Atp6v1d	V-type proton ATPase subunit D	57510.8	61204	64439.6	74837.6	74968.4	75638.4	80647.8	112588	73394.1	96956.4	81609.7	87778.8	66464.1	60165.9	84948.8	66654.2	47658.4	55649.1	42311.5	55115.8
0	1.14416	28823.2	P57759	Erp29	Endoplasmic reticulum resident protein 29	469287	441199	415052	473736	669230	597836	534618	608118	871725	809157	1.11773e+06	955747	680162	567020	556041	557497	613755	615818	599354	665370
0	1.16419	31293	P57776	Eef1d	Elongation factor 1-delta	4778977	4914877	4.29979e+06	4.39529e+06	4.97203e+06	4586239	4.2874e+06	4.31286e+06	4526001	4535689	5.13116e+06	4.69822e+06	4918147	4471177	4.1654e+06	3.97521e+06	4.51878e+06	4367897	3.89788e+06	4.23374e+06
0	1.17275	104977	P57780	Actn4	Alpha-actinin-4	2.48698e+06	2319733	2.85852e+06	2916955	2.12601e+06	1.94893e+06	2.90176e+06	2.89013e+06	2.33711e+06	2.81913e+06	4.11155e+06	4195119	1.731e+06	1662669	2.81347e+06	2685866	2.0861e+06	1.93115e+06	3080950	3.34777e+06
0	1.10711	28357.5	P57784	Snrpa1	U2 small nuclear ribonucleoprotein A'	207385	158767	119737	107751	113714	67360.2	100743	113651	186854	145633	212328	250815	122449	104072	17667.3	102001	101097	99306.8	70987.7	82609.2
0	1.12419	75330.1	P58021	Tm9sf2	Transmembrane 9 superfamily member 2	312222	345037	302574	323269	272487	308184	306232	338892	388647	434334	440138	386177	264258	211082	246236	225468	260265	280248	255769	261991
0	1.14727	26289.1	P58044	Idi1	Isopentenyl-diphosphate Delta-isomerase 1	832897	1176087	1.10872e+06	1.51103e+06	772462	1.22072e+06	964924	1.55754e+06	619982	600478	740942	1.05021e+06	724892	1250916	364022	636366	775838	765034	556665	737568
0	1.13284	10561.3	P58059	Mrps21	28S ribosomal protein S21, mitochondrial	142019	214982	201910	172725	148406	189014	174204	171096	262388	252365	293767	262206	256638	251826	261187	235909	238638	228681	251672	259317
0	1.07064	14308.6	P58064	Mrps6	28S ribosomal protein S6, mitochondrial	112177	114113	84435.2	77207	103508	84436.9	36248.7	73674.9	153013	127727	145879	122520	124172	117646	143852	101616	104662	113786	98199.8	97732.2
0	1.1249	35827.1	P58137	Acot8	Acyl-coenzyme A thioesterase 8	250940	265575	225246	186131	135258	178306	177069	203385	113556	121030	132222	148705	186300	248817	231654	192619	170379	158894	151845	138023
0	1.1955	95314	P58252	Eef2	Elongation factor 2	18692760	18648172	15879778	17681262	19809484	20256746	19345224	19288090	20538314	18574518	23130980	20200328	19622190	19086422	19060468	17891572	17848960	18949568	16901120	15635423
0	1.13826	111339	P58281	Opa1	Dynamin-like 120 kDa protein, mitochondrial	536872	536097	542865	489709	491076	551622	539180	486790	480249	485590	441046	483001	470968	492422	519074	518921	607751	546918	601422	583984
0	1.13449	36710.1	P58389	Ptpa	Serine/threonine-protein phosphatase 2A activator	344402	286639	320908	316385	315001	359499	335290	377667	314972	355036	333445	334152	280239	251791	252860	305190	282973	243706	241447	254113
0	1.0989	81645.1	P58404	Strn4	Striatin-4	44299.7	27254.7	45037.7	43826.2	37802.9	9083.32	23301.4	11673	88672.7	86306.6	89951.4	90633.1	60677	51935.7	48619.3	39422.5	40929.2	38728.6	38277.2	35868
0	1.17924	50478.3	P58710	Gulo	L-gulonolactone oxidase	5511278	4.83659e+06	5276248	6.00296e+06	9400370	9772643	9530215	8717815	7197968	6933342	6.8397e+06	6.99935e+06	9125584	9415371	8930323	8917947	9315414	9310892	9755369	7.71699e+06
0	1.15388	75787.7	P58735	Slc26a1	Sulfate anion transporter 1	476728	437240	565371	636343	705944	665771	678360	552580	492484	460086	506663	419772	600787	593592	528734	559554	586224	635126	621534	878306
0	1.1403	32680.5	P58771	Tpm1	Tropomyosin alpha-1 chain	363179	223413	313063	326370	205746	191110	235499	425860	583722	531270	915186	1.29367e+06	553101	351448	565665	446989	448016	201920	473732	548191
0	1.07797	32836.7	P58774	Tpm2	Tropomyosin beta chain	151524	19667.8	28577.2	17086.9	17897.1	925.479	19299.2	17900.7	90685.9	89998.3	70376.1	75064.8	182877	42889.5	53622.2	64694.9	129661	7987.78	129597	64281.8
0	1.07542	181825	P58871	Tnks1bp1	182 kDa tankyrase-1-binding protein	65077	53010.4	58010.1	76521.2	72855.2	90278.5	81012.5	99280.2	82704.7	71111.8	75485.7	102988	79135.3	57853.4	67894.3	85332.2	79914.6	80926.1	83640.6	108404
0	1.14881	46719.4	P59017	Bcl2l13	Bcl-2-like protein 13	767700	802577	691862	519555	547386	571590	538410	561286	528103	597838	520857	576250	489443	472829	552011	544924	468852	456988	542750	405724
0	1.10454	136447	P59242	Cgn	Cingulin	459377	167732	199773	247506	678669	707648	288620	260458	1.46591e+06	1.77315e+06	658743	659179	1.36973e+06	1.00156e+06	349527	331684	1.02108e+06	959588	277831	208806
0	0.96303	30016.2	P59266	Fitm2	Acyl-coenzyme A diphosphatase FITM2	29152.5	76127.5	86037.3	80190.7	44715.2	123315	6965.47	18417.9	47538.5	47034.1	45520	54171.2	37396.5	57362.8	72087.1	137815	60622.7	11245.6	88054.4	19717.5
0	1.15479	48968.4	P59325	Eif5	Eukaryotic translation initiation factor 5	464487	490482	531082	439027	404310	462701	448619	528738	288475	272933	321352	342948	300578	301351	306555	304640	429908	432669	376613	400398
0	1.16769	14584.9	P59708	Sf3b6	Splicing factor 3B subunit 6	386199	351991	356326	323938	237865	258736	237907	238455	300296	264043	316729	385807	243965	232362	233517	227559	283103	242794	234729	176214
0	0.970952	226550	P59764	Dock4	Dedicator of cytokinesis protein 4	21700.1	6397.14	11128.9	9954.27	7281.02	7841.91	10170	10243.4	10618.4	14962.1	13910.2	15312	11302.4	10161.4	16824.4	8698.86	3107.88	11596.2	9176.88	8374.62
0	1.04045	40693.3	P59913	Pcmtd1	Protein-L-isoaspartate O-methyltransferase domain-containing protein 1	182848	140739	153006	73040.9	118672	174074	141172	91865.5	19984.8	39120.7	102258	143074	56826.3	77098.8	89230.3	63986.6	67601.2	72035.9	65254.1	64807.2
0	1.1652	19667	P59999	Arpc4	Actin-related protein 2/3 complex subunit 4	1.61352e+06	1.68794e+06	1.55378e+06	1.59037e+06	1.4715e+06	1.57555e+06	1.43885e+06	1.56468e+06	2.09262e+06	2396781	2.26185e+06	2.52803e+06	1.59625e+06	1.3771e+06	1.39414e+06	1.38294e+06	1.3346e+06	1.49666e+06	1.40592e+06	1.62731e+06
0	1.11977	7741.32	P60060	Sec61g	Protein transport protein Sec61 subunit gamma	103529	107599	53499.4	73378.2	72998.3	87094	116421	45301.7	114324	132787	84424.9	101489	62467.1	57932.9	37388.5	81528.1	7865.68	24637.3	9441.91	15743.2
0	1.14762	50214	P60122	Ruvbl1	RuvB-like 1	361767	400295	372583	361848	309038	321432	350604	372569	472669	433929	517263	521264	345146	336715	318662	352724	300035	271540	306545	335075
0	1.155	52220.8	P60229	Eif3e	Eukaryotic translation initiation factor 3 subunit E	1169810	1.18411e+06	1.03626e+06	961130	966997	1.04885e+06	994505	847644	953283	995169	1.09769e+06	918007	739611	791506	901106	927151	835056	869452	901930	844972
0	1.11394	23025.9	P60334	Cdo1	Cysteine dioxygenase type 1	579031	683170	693774	122752	744056	797518	717152	647934	168997	234040	219389	178942	572304	706058	274571	472310	647829	683595	652186	494153
0	1.16736	37497.8	P60335	Pcbp1	Poly(rC)-binding protein 1	4312090	4.89767e+06	4.73025e+06	4321765	4298060	4.74414e+06	4.71783e+06	4.97288e+06	3.81533e+06	3.83996e+06	4081291	4.50415e+06	3.81165e+06	3509997	3.21791e+06	3.59527e+06	3.4751e+06	3650164	3.40383e+06	3.6334e+06
0	1.07676	133426.24;143234.41	P60469;Q8BSS9	Ppfia3;Ppfia2	Liprin-alpha-3;Liprin-alpha-2	19721.5	18366.5	20871.4	21616.6	23167.3	18053.8	15800.2	16721.9	26798.1	24251.5	27496.3	17754.1	24068.9	21859.5	22750.5	21521.3	23026.3	22713.6	17215.5	25872.7
0	1.14107	8182.83	P60603	Romo1	Reactive oxygen species modulator 1	365999	321285	703615	776303	844247	792247	971697	1.00004e+06	740186	723225	643810	691021	854418	712268	849912	785470	824544	728743	759389	943944
0	1.11857	18566.3	P60605	Ube2g2	Ubiquitin-conjugating enzyme E2 G2	78157.7	100600	102844	140098	138707	134455	103901	115410	164202	142966	185680	167468	148505	146320	126190	138924	135826	132914	135311	133456
0	1.13503	68017.2	P60670	Nploc4	Nuclear protein localization protein 4 homolog	368822	364486	328321	342852	310973	367741	355661	293331	321456	310519	319061	324998	312624	298382	302461	313585	338591	334699	313468	292587
0	1.2002	41736.7	P60710	Actb	Actin, cytoplasmic 1	63788308	59395552	62068364	66053264	52771100	52007044	68007344	81685832	132085072	126832680	149037888	200664848	74115776	55881440	69334072	66232536	61292052	62330652	64035208	85840152
0	1.16132	21258.6	P60766	Cdc42	Cell division control protein 42 homolog	2426895	1.98745e+06	1833668	1560345	1.85242e+06	1.54888e+06	1585865	1.38424e+06	2.74796e+06	3198034	2870629	2.31307e+06	2.10479e+06	1.65533e+06	1.75602e+06	1.96535e+06	1.53479e+06	1.41897e+06	1.48722e+06	1.41526e+06
0	1.12398	18607	P60824	Cirbp	Cold-inducible RNA-binding protein	32779.8	33752.8	50530.3	19526.4	9121.09	13841.6	21534.5	18634.5	63278.2	48402.4	85209.4	98299.6	8151.82	7549.58	12211.1	7533.11	17172.6	6783.25	9624.94	10731.5
0	1.18411	46153.9	P60843	Eif4a1	Eukaryotic initiation factor 4A-I	6687056	6.62422e+06	6.1353e+06	5.23259e+06	4535719	5084902	4841628	5076229	6.74782e+06	6673904	7.23892e+06	6886323	5212532	4.20562e+06	5.02187e+06	4367035	4763560	5271181	5.07537e+06	5.21294e+06
0	1.18642	13372.7	P60867	Rps20	40S ribosomal protein S20	8590134	8.09935e+06	8.00695e+06	7.32576e+06	7.51229e+06	6973965	6.48232e+06	6934896	7.78415e+06	7.37891e+06	8721220	8547719	8.29047e+06	7.0625e+06	7.5661e+06	6850011	8936763	8838557	7826069	8.37271e+06
0	1.1252	23706.8	P61021	Rab5b	Ras-related protein Rab-5B	486558	406352	387693	465306	459086	453624	427600	468442	500616	464680	404010	504571	437469	412058	361765	421011	404935	383019	413386	417524
0	1.13731	22432.1	P61022	Chp1	Calcineurin B homologous protein 1	298102	223931	234213	231063	211023	200863	216835	196202	212499	194620	207885	222467	209803	221503	238593	258216	143170	165638	186846	214417
0	1.14634	22540.9	P61027	Rab10	Ras-related protein Rab-10	734153	671411	699363	702856	718531	788950	854681	830032	745316	771406	721905	820558	756499	682654	781162	713988	752377	760451	721073	780119
0	1.09358	23603.1	P61028	Rab8b	Ras-related protein Rab-8B	45375.8	48161.2	26397.8	22695.4	19948.3	21349.9	19795	28876.2	69585.4	76016.8	79041.4	84193.8	32448.3	21851.3	28089.1	26863.8	22047.4	20894.3	19469.3	30796.7
0	1.14664	16687.2	P61079	Ube2d3	Ubiquitin-conjugating enzyme E2 D3	1.45683e+06	1.41308e+06	1495693	1.82598e+06	1.69856e+06	1.96127e+06	1.7082e+06	2.10162e+06	1.49375e+06	1.63708e+06	1.48088e+06	1.47258e+06	1.31481e+06	1372557	1222379	1.27428e+06	931678	977375	1.08531e+06	1.25709e+06
0	1.1287	20900	P61082	Ube2m	NEDD8-conjugating enzyme Ubc12	368025	454231	358428	358370	351216	289878	320231	279081	357107	430556	403213	432989	365931	313606	343846	323821	213873	221220	272628	311006
0	1.131	22406.7	P61087	Ube2k	Ubiquitin-conjugating enzyme E2 K	193255	185118	195920	182649	149832	131239	164087	89985.7	172174	193378	171879	149998	193447	196355	153975	189267	135926	113376	134354	142683
0	1.16296	17137.8	P61089	Ube2n	Ubiquitin-conjugating enzyme E2 N	3.14737e+06	3.02671e+06	2845945	2.85361e+06	3.02044e+06	2719568	2.73179e+06	2.18281e+06	3.81801e+06	4.06604e+06	3.76533e+06	3.72702e+06	3.1988e+06	3.01043e+06	2.8738e+06	3.18329e+06	2566427	2.56557e+06	2.5596e+06	2.59363e+06
0	1.08516	17417.6	P61148	Fgf1	Fibroblast growth factor 1	48032.9	36685.9	38454.8	44376.9	48485.7	50778.2	49847.1	52583.5	24943.6	21499	18540	17273.6	18661.1	20048.9	18237.8	30496.9	24315.8	26186.7	31669.2	26314
0	1.16118	44760.8	P61161	Actr2	Actin-related protein 2	1301329	1.34835e+06	1.29499e+06	1.28197e+06	1.23601e+06	1373006	1.41527e+06	1.34681e+06	1.65624e+06	1955793	1.91549e+06	1.71965e+06	1.19483e+06	1.14444e+06	1.25761e+06	1.25634e+06	1.09771e+06	1.12559e+06	1277965	1.26897e+06
0	1.13111	42613.7	P61164	Actr1a	Alpha-centractin	354909	326402	306053	329427	349816	310869	327421	349611	475559	475994	547182	456569	402912	399970	364175	354371	358731	384304	296380	308368
0	1.13606	9078.87	P61166	Tmem258	Transmembrane protein 258	753908	654808	845142	536624	563183	529729	562807	604201	410572	465978	368382	357848	542407	412647	480349	402879	1.00569e+06	999423	800442	830079
0	1.14432	51596.7	P61202	Cops2	COP9 signalosome complex subunit 2	401035	338600	454398	404718	461945	363512	442445	393120	415077	465460	496084	391142	488103	469772	478852	518921	418724	424129	431035	419771
0	1.15008	20600.76;20696.76	P61205;P84078	Arf3;Arf1	ADP-ribosylation factor 3;ADP-ribosylation factor 1	904594	796230	363342	318735	426027	319628	345238	237530	579207	635568	391438	424304	446185	297918	290122	391454	300145	314626	209259	249842
0	1.09225	20411.6	P61211	Arl1	ADP-ribosylation factor-like protein 1	362726	347360	116864	116476	182251	81474	75705.9	72500.5	240279	245557	228549	250192	251816	165918	111850	125987	168683	200223	114790	159233
0	1.16773	67314.3	P61222	Abce1	ATP-binding cassette sub-family E member 1	957009	960559	966704	844246	1.02097e+06	954016	898673	975221	945320	930603	1.03341e+06	984240	974264	925893	808406	891563	906310	962372	867372	914414
0	1.12208	20504.35;20642.48;20744.76	P61226;Q80ZJ1;Q8BU31	Rap2b;Rap2a;Rap2c	Ras-related protein Rap-2b;Ras-related protein Rap-2a;Ras-related protein Rap-2c	134590	146597	146425	138394	145807	136770	133857	97044.8	212803	247178	234356	226331	158473	149750	158684	152670	118041	114392	132209	130261
0	1.17474	17258.2	P61255	Rpl26	60S ribosomal protein L26	4.36519e+06	4439429	4.16409e+06	3.8954e+06	4.14973e+06	4189416	3.85895e+06	3.52319e+06	4804070	4.553e+06	5073013	4.71123e+06	4.34913e+06	3.94304e+06	4258898	3963624	4301375	4.35035e+06	4165506	4.07337e+06
0	1.12804	29506	P61290	Psme3	Proteasome activator complex subunit 3	310292	350958	327239	302765	287614	275531	283159	344421	257774	260503	276569	318926	253188	216658	207383	212254	213933	214167	239344	248160
0	1.13675	17163.6	P61327	Magoh	Protein mago nashi homolog	217563	187672	185777	128998	111632	134958	92728.1	99014.6	186853	178133	183608	195038	104159	100413	132115	138546	117287	106578	144212	140415
0	1.17762	15797.7	P61358	Rpl27	60S ribosomal protein L27	5691739	5.21357e+06	5.10261e+06	4951111	5.25749e+06	5220762	4.08715e+06	4681259	6.19669e+06	5.26649e+06	5.92404e+06	5.87778e+06	4.69003e+06	4.23201e+06	4.02489e+06	3.88003e+06	5104867	4.99331e+06	4.85914e+06	4.76408e+06
0	1.17409	11985.6	P61458	Pcbd1	Pterin-4-alpha-carbinolamine dehydratase	6434824	6.72007e+06	7180411	9268072	9280277	9940482	8510061	9912312	6488047	6.69883e+06	6680151	5.33197e+06	6.54822e+06	7575072	6.76295e+06	9280208	6.50941e+06	6.79961e+06	5833689	6379479
0	1.16601	10275.2	P61514	Rpl37a	60S ribosomal protein L37a	998875	1.5869e+06	2.00318e+06	2.24452e+06	2.4138e+06	2.35494e+06	1.74188e+06	2.0183e+06	2.80859e+06	2.56469e+06	2.81186e+06	2.70344e+06	2.65895e+06	2.33309e+06	2.08549e+06	2.16854e+06	2.42921e+06	2612369	2.42756e+06	2362958
0	1.17041	52264.7	P61620	Sec61a1	Protein transport protein Sec61 subunit alpha isoform 1	2.11974e+06	2384203	2237189	2.79871e+06	2.55727e+06	3212492	3074759	2.60043e+06	1.81437e+06	1.8581e+06	2.14875e+06	1.67272e+06	1.57108e+06	1.30672e+06	2274935	2.17866e+06	1.77332e+06	1.8153e+06	2.16517e+06	1.83909e+06
0	1.10424	20396.6	P61750	Arf4	ADP-ribosylation factor 4	212254	135046	50147.6	29747.6	62043.1	74679.1	30613.2	64216	74789.3	74725.4	68559.6	76462.5	76527.8	53642.7	46550.4	46509.9	88195	69270	52409	62808
0	1.11934	22435.6	P61759	Vbp1	Prefoldin subunit 3	127861	137518	114094	113101	140765	117388	100574	69396.2	263267	227469	274866	209612	189094	174965	125921	153389	135020	120795	128695	122883
0	1.1517	12496.7	P61804	Dad1	Dolichyl-diphosphooligosaccharide--protein glycosyltransferase subunit DAD1	2.13234e+06	2.31485e+06	1.91754e+06	2.12355e+06	2.16672e+06	2.0887e+06	2.11197e+06	1.98223e+06	1.92762e+06	1.80143e+06	2.41554e+06	2.03848e+06	1466302	1.20467e+06	1.20728e+06	1.66985e+06	1.61614e+06	1.67219e+06	1.54108e+06	1.65169e+06
0	1.17865	56451.8	P61922	Abat	4-aminobutyrate aminotransferase, mitochondrial	5.83392e+06	6.46204e+06	6390833	6.00444e+06	5637247	6041259	6345425	6020318	4438590	5.51965e+06	3.41598e+06	4.46534e+06	5.10398e+06	6693537	5.86035e+06	6619378	6.24517e+06	6.27405e+06	6393029	7.33078e+06
0	1.16666	20198.2	P61924	Copz1	Coatomer subunit zeta-1	1.00222e+06	884990	807111	903431	921103	1.05501e+06	681598	700988	1.0359e+06	1118684	1326736	1.25344e+06	698223	722914	745717	983829	667714	756900	789322	661522
0	1.16432	10871.2	P61957	Sumo2	Small ubiquitin-related modifier 2	212567	158986	152511	95902.9	153232	122928	99169.9	157798	171966	160712	184110	210825	149941	89103.7	60345.7	62183	123123	122036	93280.4	111080
0	1.14708	9117.58	P61961	Ufm1	Ubiquitin-fold modifier 1	1897876	1.03683e+06	1.09822e+06	2.07527e+06	1.0649e+06	1.5379e+06	1.49978e+06	1.27494e+06	947193	1225023	1.07603e+06	659271	389869	319052	524436	992034	577254	403610	670551	546888
0	1.14557	18733	P61967	Ap1s1	AP-1 complex subunit sigma-1A	214668	218576	194794	194086	210578	194030	149018	189710	269766	269468	282096	275881	256327	260164	226499	215073	200409	199448	176935	221902
0	1.15173	14478.5	P61971	Nutf2	Nuclear transport factor 2	730571	633556	711295	577226	610299	631528	634140	628843	995510	981208	881797	937622	731011	631920	598813	604764	570959	576020	518488	607479
0	1.17133	50976.2	P61979	Hnrnpk	Heterogeneous nuclear ribonucleoprotein K	7.91782e+06	7740152	7501053	6.22976e+06	5.80036e+06	5922503	6.41695e+06	6.89208e+06	7738532	7.43628e+06	8.16744e+06	9120891	6139262	5485310	5759695	5.82771e+06	5.91902e+06	5905970	5.7659e+06	6742492
0	1.16753	28302.6	P61982	Ywhag	14-3-3 protein gamma	5.17878e+06	4.4361e+06	4702933	4.75244e+06	4.50577e+06	5100644	4236121	4.38747e+06	6.19534e+06	6620190	6905508	6.48249e+06	5.38936e+06	4.82923e+06	5.12088e+06	5.24623e+06	4727627	4.66586e+06	4.51163e+06	4.39107e+06
0	1.1382	23399.6	P62071	Rras2	Ras-related protein R-Ras2	284982	238071	125218	167953	166832	143454	159574	133086	196313	38472	188987	185745	144037	119984	144991	124178	172228	145047	150602	153726
0	1.132	10333	P62073	Timm10	Mitochondrial import inner membrane translocase subunit Tim10	381639	387852	368200	265107	281981	271256	301839	376550	326859	273589	254851	330101	302477	288477	348277	262195	434466	367088	414785	481435
0	1.1622	10457.9	P62075	Timm13	Mitochondrial import inner membrane translocase subunit Tim13	3082970	3.27151e+06	3.18415e+06	2.70235e+06	2.49125e+06	2766222	2892376	2972536	3.59291e+06	3.7372e+06	3.06773e+06	3.38784e+06	3.23856e+06	3137044	3.03824e+06	2.86114e+06	3.22453e+06	3042590	3164491	3.35384e+06
0	1.13872	9286.48	P62077	Timm8b	Mitochondrial import inner membrane translocase subunit Tim8 B	776926	906084	784947	626203	738341	676798	649558	859524	569764	635822	657154	672937	728029	643365	668674	700746	743073	670591	760357	740675
0	1.18488	22126.8	P62082	Rps7	40S ribosomal protein S7	9672519	9937696	8778878	7.82748e+06	7.72131e+06	8.15898e+06	7.58853e+06	8646732	10130209	9387713	12139838	12553056	12165805	9842268	8.02397e+06	7584547	11986550	11691689	9954986	11561439
0	1.13873	37540.1	P62137	Ppp1ca	Serine/threonine-protein phosphatase PP1-alpha catalytic subunit	311508	278317	293532	258173	321490	271333	238253	265137	665312	581300	657840	719243	484432	435175	194849	363028	418259	414900	342281	380173
0	1.14512	37186.8	P62141	Ppp1cb	Serine/threonine-protein phosphatase PP1-beta catalytic subunit	383987	353042	387901	418188	392470	406202	475726	464731	453149	462539	470766	449663	355332	318782	289640	354831	301742	298761	297498	330818
0	1.16028	49184.5	P62192	Psmc1	26S proteasome regulatory subunit 4	1.31599e+06	1.27531e+06	1.2988e+06	1.42655e+06	1.27636e+06	1.41212e+06	1.32497e+06	1.39162e+06	1.46089e+06	1.44958e+06	1.44079e+06	1387747	1.49244e+06	1.40877e+06	1511204	1428891	1.18708e+06	1.17261e+06	1.21785e+06	1.17296e+06
0	1.15872	45626	P62196	Psmc5	26S proteasome regulatory subunit 8	1.35652e+06	1.40616e+06	1.26974e+06	1.45665e+06	1.34782e+06	1.54816e+06	1.44741e+06	1.48107e+06	1290526	1.32986e+06	1335226	1.21707e+06	1.31271e+06	1.36954e+06	1.28764e+06	1409915	1.01841e+06	1.10479e+06	1.04377e+06	1.1161e+06
0	1.18548	24205.2	P62242	Rps8	40S ribosomal protein S8	7153609	7332766	6480525	6.26292e+06	6.49639e+06	6850607	6430132	5405387	7756569	7214924	7950648	8.14376e+06	7.02355e+06	6.11713e+06	6209290	6.08571e+06	7451758	7358932	6.68966e+06	6.9445e+06
0	1.18166	14839.5	P62245	Rps15a	40S ribosomal protein S15a	7161916	6899222	7483899	6687517	6.40598e+06	6.87052e+06	6.50987e+06	6.51067e+06	6.78498e+06	6954959	7.49127e+06	7551836	6.61899e+06	6072736	6.53834e+06	6212554	6.41862e+06	6.75965e+06	6326497	6383826
0	1.09195	20655.2	P62257	Ube2h	Ubiquitin-conjugating enzyme E2 H	138590	139388	121475	120905	109072	135446	138521	146822	116836	128503	155766	149894	175249	163071	128426	156122	104840	122723	112781	111443
0	1.16852	29173.9	P62259	Ywhae	14-3-3 protein epsilon	3.88408e+06	3.59834e+06	3.57588e+06	3.93092e+06	3.70842e+06	3.9163e+06	4.04014e+06	3.71691e+06	4868802	4918885	4.86895e+06	4.9521e+06	4.20704e+06	3869327	4.01808e+06	4.17495e+06	3.59293e+06	3.54785e+06	3.67325e+06	3.68838e+06
0	1.17615	16272.7	P62264	Rps14	40S ribosomal protein S14	7.4581e+06	7.09361e+06	6951364	6718944	6.93752e+06	6358442	6221082	8.21762e+06	7.8808e+06	7.49127e+06	7.92934e+06	9057356	7.31418e+06	6751412	6275405	5.25784e+06	7.83065e+06	8157717	7256391	8.15122e+06
0	1.16843	15807.5	P62267	Rps23	40S ribosomal protein S23	4.62585e+06	4.73587e+06	4.72815e+06	4828764	4.8296e+06	5.13218e+06	4704813	5.10498e+06	4.59774e+06	4.39767e+06	4353668	4666502	4.35527e+06	3.81635e+06	4.04223e+06	4.27651e+06	4.35335e+06	4243556	4193115	4196398
0	1.17999	17718.7	P62270	Rps18	40S ribosomal protein S18	15401904	15939141	13328336	13757700	14582259	15618646	15101546	13699024	15327803	14721722	15560469	14904273	12932211	11819330	12403012	12344352	12511993	12945416	12869283	12562383
0	1.1556	6676.76	P62274	Rps29	40S ribosomal protein S29	1.20524e+06	1.7734e+06	2.64365e+06	2.42978e+06	2.8068e+06	2.3559e+06	2.21989e+06	2249286	3.1778e+06	2802552	3.65449e+06	3.3186e+06	2.93469e+06	2853158	2.62813e+06	2.32083e+06	3.00955e+06	3.06033e+06	2.86232e+06	2612830
0	1.18571	18430.7	P62281	Rps11	40S ribosomal protein S11	11444156	11430447	12179174	11042520	11366799	12392237	10903409	11071604	13849243	12602697	14143102	14433491	11126100	11017449	11784068	11032261	12470609	12532967	11451652	12269965
0	1.18138	17222.3	P62301	Rps13	40S ribosomal protein S13	11249606	11353220	10575206	9890592	10513380	10111430	9989285	10867125	11151962	10658539	12620164	11869439	10126177	9407998	9911448	9191058	10377786	10235842	9622838	9881515
0	1.15264	10803.6	P62305	Snrpe	Small nuclear ribonucleoprotein E	2028112	2.0022e+06	1.68705e+06	1.24245e+06	1.21438e+06	1.05501e+06	945746	824144	2.24976e+06	1.89694e+06	2.87103e+06	2612309	1.63882e+06	1474886	1.55169e+06	1.44575e+06	1877967	1.90192e+06	1.94396e+06	2.04782e+06
0	1.14262	9725.19	P62307	Snrpf	Small nuclear ribonucleoprotein F	174907	333911	278409	311540	176507	106257	187962	144981	671208	608663	547772	908353	302550	213435	196100	201227	190777	176125	262561	219390
0	1.1284	8496.06	P62309	Snrpg	Small nuclear ribonucleoprotein G	322108	306535	291348	228434	253496	211918	253873	298257	388572	370704	464832	513686	349041	307332	273474	272505	309709	317337	298521	387356
0	1.12623	11845.4	P62311	Lsm3	U6 snRNA-associated Sm-like protein LSm3	781507	805629	676877	609293	649682	598444	622625	590706	835500	858670	911897	988278	600792	542999	528417	537600	588992	563852	521581	620973
0	1.12016	9127.57	P62313	Lsm6	U6 snRNA-associated Sm-like protein LSm6	272378	296641	247324	226436	199017	180780	178950	177015	374538	346909	372430	375703	267395	222932	172729	244681	269493	262665	263680	276157
0	1.16167	13281.6	P62315	Snrpd1	Small nuclear ribonucleoprotein Sm D1	882605	981480	868102	746007	589603	745322	793651	733108	542060	555272	700502	710470	396274	385305	519891	626265	531530	530000	627364	627481
0	1.15792	13526.9	P62317	Snrpd2	Small nuclear ribonucleoprotein Sm D2	652690	699834	511248	481252	375724	362834	417525	587112	547533	454009	578838	651977	380578	267078	368409	391989	390883	378795	378391	439914
0	1.15079	13916.2	P62320	Snrpd3	Small nuclear ribonucleoprotein Sm D3	1.14739e+06	1.17051e+06	1.06344e+06	842833	711995	837339	1.07576e+06	1.07316e+06	905524	849650	1.04121e+06	1.24525e+06	710069	604934	764436	704953	747683	734907	741684	860784
0	1.07557	9937.48	P62322	Lsm5	U6 snRNA-associated Sm-like protein LSm5	22094.9	27399.8	20202	27416	22307.4	29453.4	27635.4	26169.3	41702.4	27630.3	38876.7	32142.8	18740.6	21265.9	10578.5	25225.5	55615.4	41687.6	21708.4	24307.2
0	1.16174	20082.2	P62331	Arf6	ADP-ribosylation factor 6	742673	736138	522815	509886	525297	368079	443289	415253	585101	606236	553101	569114	529770	394958	414235	405260	560107	554828	488440	489212
0	1.15681	44173	P62334	Psmc6	26S proteasome regulatory subunit 10B	1.16117e+06	1.21567e+06	1.16549e+06	1.25245e+06	1.17518e+06	1200736	1.14187e+06	1.09807e+06	1.39074e+06	1.32816e+06	1.38774e+06	1.29631e+06	1.31539e+06	1400087	1.20151e+06	1.22892e+06	1.14814e+06	1.23939e+06	1.11008e+06	1.16155e+06
0	1.0842	22292.1	P62342	Selenot	Thioredoxin reductase-like selenoprotein T	363251	342746	360995	448001	377869	268255	392465	94592.9	351792	315904	404481	369125	272247	311092	302704	335469	265110	317968	333645	220645
0	1.08316	109811	P62500	Tsc22d1	TSC22 domain family protein 1	42652.2	36144.1	30403.5	20398.2	54872.9	21633.5	40803.2	24979.4	49362.8	39981.3	83182.7	72086.2	56201.5	38267.4	81635.1	28456.8	37875.4	37253.2	52403.6	24187.8
0	1.17369	29597.7	P62702	Rps4x	40S ribosomal protein S4, X isoform	6.02696e+06	6.16236e+06	6210586	5.82525e+06	6.36153e+06	5772024	5.01168e+06	6435039	7.33948e+06	6.28344e+06	7316174	7.71535e+06	6682808	5974555	5610091	5.39646e+06	6855314	6848064	6117026	6.39793e+06
0	1.16578	20732.3	P62717	Rpl18a	60S ribosomal protein L18a	4.185e+06	4.5849e+06	5.11822e+06	4.76931e+06	5112041	5.36601e+06	4.82003e+06	4957824	5.37515e+06	5070501	6032287	5.58313e+06	4.8459e+06	4577561	4770364	4.8166e+06	5186013	5.10088e+06	5207159	5197950
0	1.20229	42008.9	P62737	Acta2	Actin, aortic smooth muscle	89885176	67050932	75338200	77539112	66174772	61562644	68789704	88887816	132851944	142173248	176079552	204159312	119287816	89865928	80037392	75944808	91108696	75540768	87793816	94707200
0	1.16162	17017.7	P62743	Ap2s1	AP-2 complex subunit sigma	1515067	1.55369e+06	1.24035e+06	913528	1.22353e+06	1.08214e+06	749888	477200	1.47299e+06	1.14005e+06	1.53971e+06	1.39011e+06	1.06488e+06	875277	822359	977765	1.09116e+06	1.17435e+06	1.27855e+06	1051727
0	1.12909	22338.2	P62748	Hpcal1	Hippocalcin-like protein 1	123048	125510	92207.6	92311.8	115894	106307	89686.8	100878	226355	242198	244896	204282	108106	101889	96316.5	129836	75625.7	73219	75573.6	77363.2
0	1.15871	17695.1	P62751	Rpl23a	60S ribosomal protein L23a	1.3463e+06	1.09509e+06	1.11063e+06	1.02204e+06	1139842	1.06827e+06	875540	1258237	2.02803e+06	1.58723e+06	2135199	2.45189e+06	2.08197e+06	1.63088e+06	1.31064e+06	1.02097e+06	1.87487e+06	2.04416e+06	1.75604e+06	1.91605e+06
0	1.18064	28680.6	P62754	Rps6	40S ribosomal protein S6	3.87467e+06	3.82499e+06	3.81584e+06	3.42472e+06	3.43151e+06	3408060	3042444	3.7133e+06	5.45051e+06	4.81208e+06	5.03841e+06	5.66891e+06	4975016	4.05747e+06	3500129	3090598	5.25589e+06	5382843	4262066	4995236
0	1.16996	12860.8	P62774	Mtpn	Myotrophin	609878	576805	593215	628437	561567	680343	669734	594796	803249	849576	690056	667788	558571	521247	448126	647968	526130	573210	572950	604534
0	1.21529	11367.3	P62806	H4c16	Histone H4	4660561	4.99467e+06	78752992	70007904	1.58996e+06	2033778	63034156	66907368	2143102	2.01165e+06	105961424	121084696	2.06465e+06	2.43513e+06	63360788	59488628	1.73027e+06	1.87657e+06	63443356	73095288
0	1.16535	56550.8	P62814	Atp6v1b2	V-type proton ATPase subunit B, brain isoform	990290	1.04482e+06	950640	879235	893722	935039	896018	911728	1.51076e+06	1.79028e+06	1.67236e+06	1.62963e+06	1.12444e+06	1.07396e+06	853749	1.01199e+06	838819	824894	792284	985044
0	1.17075	22677.8	P62821	Rab1A	Ras-related protein Rab-1A	2.80618e+06	2.63141e+06	2.05503e+06	2.05678e+06	2164252	1.86516e+06	2.03657e+06	2.28754e+06	2525882	2.46558e+06	2.70663e+06	2.62627e+06	2.34352e+06	2.08754e+06	2.08046e+06	1.91293e+06	1.87505e+06	1.8526e+06	1.804e+06	1.81429e+06
0	1.16454	24423.1	P62827	Ran	GTP-binding nuclear protein Ran	2.15142e+06	1854540	2.03202e+06	1.66083e+06	1.64872e+06	1.58685e+06	1497011	1.49048e+06	2343672	2152901	2.65456e+06	2.4324e+06	2.11935e+06	1959549	1.89403e+06	1.71954e+06	2.00168e+06	1.9511e+06	1861744	2.06136e+06
0	1.16501	14865.4	P62830	Rpl23	60S ribosomal protein L23	9101755	8813300	8.28841e+06	7.83651e+06	8733926	9017961	8195171	8434615	9274545	8567798	9301042	8681812	8123145	7066626	7.03238e+06	7.536e+06	7731684	8068258	6.95513e+06	7.31347e+06
0	1.17236	20987.2	P62835	Rap1a	Ras-related protein Rap-1A	2.45252e+06	2519611	2.2855e+06	2.38869e+06	2.25915e+06	2194225	2186638	2.5897e+06	3.04637e+06	3.27018e+06	2.865e+06	3.36183e+06	2.37916e+06	2.27635e+06	2.00915e+06	1.96433e+06	2.11961e+06	2.01539e+06	2.11011e+06	2.28864e+06
0	1.16813	17040.1	P62843	Rps15	40S ribosomal protein S15	838874	1.03642e+06	835782	806877	739313	971385	872918	873180	940596	920910	896460	887681	715448	637052	674149	787299	757413	743573	696311	812808
0	1.14278	15423.2	P62849	Rps24	40S ribosomal protein S24	139262	143180	94514.8	92092.3	110623	114102	94933.6	104121	125690	126829	129335	112229	108180	89098.5	99827.3	82658.2	94003.2	111340	92735.6	99419.5
0	1.18114	13742.1	P62852	Rps25	40S ribosomal protein S25	6415263	6735497	6.34685e+06	6565514	7220859	7653999	7222467	8626808	6.307e+06	5982133	6.77084e+06	6.49561e+06	5.97461e+06	5186356	5595982	5.63497e+06	5557340	5510927	5.22875e+06	5.44767e+06
0	1.18709	13015.4	P62855	Rps26	40S ribosomal protein S26	3.25926e+06	3.40186e+06	4.06417e+06	4310204	4.80125e+06	5.23816e+06	4.18412e+06	4.99085e+06	3.66915e+06	3.64559e+06	3.30112e+06	3.60103e+06	3716877	3.52169e+06	3.35416e+06	3.64979e+06	3740053	3767815	3.60926e+06	3.27825e+06
0	1.18209	7841.02	P62858	Rps28	40S ribosomal protein S28	7.8882e+06	8.35361e+06	7.05685e+06	6.58109e+06	6.72558e+06	6.77895e+06	6.56059e+06	6.46272e+06	7859465	7.39109e+06	8965137	8312442	6968952	6244446	7567964	6.49903e+06	7690790	7643122	7350170	6.63976e+06
0	1.13809	6647.85	P62862	Fau	40S ribosomal protein S30	2485745	2.40955e+06	2.27337e+06	2.20262e+06	2.27665e+06	2.32928e+06	2.40045e+06	2242215	2.03156e+06	2.09234e+06	2.21782e+06	2.06424e+06	1.84755e+06	1.74068e+06	1.95891e+06	1.9697e+06	1640098	1687817	1.70039e+06	1.5847e+06
0	1.16841	13169.9	P62869	Elob	Elongin-B	680317	634141	571676	641409	567868	621559	647695	561731	663037	687029	749595	735527	546015	537870	530691	564762	420064	498218	417738	450785
0	1.1239	37377	P62874	Gnb1	Guanine nucleotide-binding protein G(I)/G(S)/G(T) subunit beta-1	230081	221625	221258	231637	246122	216862	229040	255333	447866	433088	502701	524784	336116	303557	272133	252970	310308	246823	267874	280257
0	1.04828	7645.11	P62876	Polr2l	DNA-directed RNA polymerases I, II, and III subunit RPABC5	27198.3	20707.6	34016.8	10799.5	6734.89	14592.6	7197.13	11957.7	18296.8	27587.1	17653.3	19257.9	27376.6	16482.8	22126.5	13843.6	13809.7	25586.8	24941.8	17641.8
0	1.03347	12274	P62878	Rbx1	E3 ubiquitin-protein ligase RBX1	7627.72	15345.4	17185.5	45620.4	5543	7330.98	15884.2	35181	20453.8	17268.1	25672.6	39572.6	37287.9	22927.8	17587.9	8377.07	33664.9	34232.4	19356.9	32258
0	1.15965	37331	P62880	Gnb2	Guanine nucleotide-binding protein G(I)/G(S)/G(T) subunit beta-2	2242125	2.24635e+06	2.06888e+06	2195192	2.31497e+06	2.42326e+06	2.17197e+06	2349710	2.90612e+06	2823684	3.03475e+06	3.05682e+06	2.20471e+06	2092607	2037914	1.98216e+06	2.08245e+06	2.0055e+06	2.18487e+06	2.09499e+06
0	1.16721	12784	P62889	Rpl30	60S ribosomal protein L30	5946672	6699048	6164597	5.89055e+06	5879912	6061647	4812602	5.01864e+06	7459951	6794804	7862399	7.58088e+06	6466119	5547427	5370345	5796966	7.0046e+06	7.06733e+06	6.36397e+06	6.79285e+06
0	1.14076	6406.67	P62892	Rpl39	60S ribosomal protein L39	916134	1.10272e+06	1.16194e+06	1.03422e+06	1.30731e+06	1.32678e+06	1.07484e+06	990338	1.2043e+06	1.1259e+06	1105347	1.32026e+06	1.15329e+06	1.03314e+06	1.1043e+06	915118	1.25828e+06	1.21267e+06	1.23267e+06	933360
0	1.17035	11605.4	P62897	Cycs	Cytochrome c, somatic	6699761	7.88673e+06	6184281	5423589	5427591	5.36244e+06	5206337	5.91116e+06	5.68262e+06	5.55661e+06	5.20735e+06	5.87559e+06	6278302	6403098	6198721	5629100	6.37961e+06	5.50229e+06	6.34835e+06	6.5121e+06
0	1.17632	14462.9	P62900	Rpl31	60S ribosomal protein L31	6.21921e+06	6191896	5614207	5459953	6053742	6515093	5.46702e+06	6.10682e+06	5584733	5308025	5920339	5.78455e+06	5.10226e+06	4638797	5044045	4970139	4.86632e+06	5037455	4699440	4.68052e+06
0	1.19264	26674.3	P62908	Rps3	40S ribosomal protein S3	9886137	9954180	9975277	9596175	9625684	10186337	9529695	10922532	9608626	9274432	10111213	9525858	9123343	7.94738e+06	8854626	8607765	8.15327e+06	8415279	8.10622e+06	8028007
0	1.1697	15859.8	P62911	Rpl32	60S ribosomal protein L32	2.4137e+06	2.83962e+06	3.13772e+06	3022846	3173787	3.32206e+06	2.8795e+06	3.07855e+06	3.53376e+06	3.36864e+06	3.57632e+06	3.60161e+06	2.91782e+06	2.82183e+06	2.94666e+06	2937921	3.16142e+06	3323798	2.88319e+06	2.85858e+06
0	1.17358	28024.7	P62918	Rpl8	60S ribosomal protein L8	6.80957e+06	6.26835e+06	7530959	8.14971e+06	8.30941e+06	9076009	8345496	10029276	8.04574e+06	7462587	7509411	8399409	7.4832e+06	6754876	6.92056e+06	6863389	7.96324e+06	8.15594e+06	7202619	7833443
0	1.18346	35729.9	P62960	Ybx1	Y-box-binding protein 1	2.34159e+06	2.1567e+06	2.3675e+06	2.0882e+06	1750327	2313208	1.97963e+06	1.90212e+06	1.83486e+06	1.80346e+06	1.30971e+06	1.6513e+06	1.81399e+06	1.6557e+06	2.08024e+06	1.88223e+06	2.0008e+06	1.77778e+06	1.65452e+06	2.03009e+06
0	1.17551	14957.2	P62962	Pfn1	Profilin-1	10289421	10491033	8560041	9262344	9544377	9159272	9290229	8873282	17315232	19497418	19427402	19191382	12178102	10292883	10375573	10463368	8769285	9048782	8329887	8961824
0	1.16824	17950.9	P62983	Rps27a	Ubiquitin-40S ribosomal protein S27a	2.8747e+06	2532591	2.77321e+06	2.5598e+06	2.11524e+06	2.75831e+06	2.80699e+06	2.1031e+06	2807521	3.05265e+06	3.03636e+06	2901208	2.66011e+06	2.33083e+06	2.37771e+06	2.64842e+06	2187956	2132483	2302669	2387469
0	1.08512	14728.3	P62984	Uba52	Ubiquitin-60S ribosomal protein L40	17652.2	9133.17	1204.46	47075.8	197052	213611	8367.43	139796	10114.9	7623.72	21147.3	281773	212767	218556	8098.97	193979	292433	202809	231754	249216
0	1.15983	33665.7	P62996	Tra2b	Transformer-2 protein homolog beta	446889	424180	336196	295047	279742	299720	262836	235877	439776	318774	446499	473955	279654	226106	204520	232989	287754	287046	232411	255024
0	1.16295	21450.1	P63001	Rac1	Ras-related C3 botulinum toxin substrate 1	799073	749005	706926	768131	774388	645003	735739	680841	1.23464e+06	1.35857e+06	1.09064e+06	1.07081e+06	1.00333e+06	683455	709426	738869	810055	803170	643497	831908
0	1.06029	21999.8	P63002	Tle5	TLE family member 5	55802.5	42689.3	68991	14110	38413.2	34271	23050.9	30560.9	43513.4	49440.2	54291.8	51366.4	26220.3	35317	26943.7	26225.8	41915.1	53224	35168.5	44804.4
0	1.12608	46670	P63005	Pafah1b1	Platelet-activating factor acetylhydrolase IB subunit beta	374608	342322	376138	366218	329385	324280	352790	304274	396656	464602	432381	374442	329424	307615	301976	349770	263256	283625	306159	272953
0	1.19286	70871.1	P63017	Hspa8	Heat shock cognate 71 kDa protein	18625122	17796434	16210621	16872508	17048658	15505630	14589199	17084230	18657826	15831703	20108128	19353472	19248882	16727147	16211943	16611176	16234549	16218133	15022737	16083489
0	1.11063	11480.26;12690.78	P63024;P63044	Vamp3;Vamp2	Vesicle-associated membrane protein 3;Vesicle-associated membrane protein 2	290794	232867	211025	177708	175844	186827	145188	129779	270541	219492	191216	221830	116445	60392.6	81753.9	138837	109246	26693.3	99425.2	128004
0	1.16741	19462.2	P63028	Tpt1	Translationally-controlled tumor protein	2.13771e+06	2.01401e+06	1.59668e+06	1.50634e+06	1.75045e+06	1.75172e+06	1.51436e+06	1.91593e+06	2.88912e+06	2.64543e+06	3.25939e+06	2.68695e+06	1.93607e+06	1.91685e+06	1.87035e+06	1.35156e+06	1.70323e+06	1.62414e+06	1.49752e+06	1.39155e+06
0	1.15942	12454.6	P63030	Mpc1	Mitochondrial pyruvate carrier 1	461720	472789	591532	584054	503314	391622	565070	527921	915798	835144	731906	896711	582206	664450	701678	630918	389210	645053	582891	694559
0	1.14609	44868.2	P63037	Dnaja1	DnaJ homolog subfamily A member 1	927452	860596	997974	1.14753e+06	1.18869e+06	1.35964e+06	1.06506e+06	1.14263e+06	836798	770527	970084	790407	1.1019e+06	1.15723e+06	1.21769e+06	1280492	1.1378e+06	1291546	1.24603e+06	1.15739e+06
0	1.20054	60955.5	P63038	Hspd1	60 kDa heat shock protein, mitochondrial	23817756	24321586	21789510	20114952	19711140	19491758	20340876	20271864	21423564	23134302	19650276	21650722	23335268	23226078	24182960	21268128	23705824	21747970	22326300	26263480
0	1.16396	25053.2	P63073	Eif4e	Eukaryotic translation initiation factor 4E	1.03435e+06	1.004e+06	852087	837405	896814	883370	802267	823660	883651	864640	997322	765539	762531	765963	825693	811100	793947	820686	731735	753735
0	1.06055	15807.9	P63082	Atp6v0c	V-type proton ATPase 16 kDa proteolipid subunit c	51469.5	56183.8	35830.7	25345	25910.3	24644.7	6629.95	7551	112833	85099.9	138391	142131	75812.9	68315	71909.9	55322	61596.3	80868.3	74544.1	77013.7
0	1.13921	41275.6	P63085	Mapk1	Mitogen-activated protein kinase 1	462691	450006	456998	490276	448353	496144	477068	501461	630319	660559	723794	634888	500800	518190	506661	555985	421816	424717	447314	428278
0	1.16095	36983.8	P63087	Ppp1cc	Serine/threonine-protein phosphatase PP1-gamma catalytic subunit	1.11555e+06	1.02596e+06	1.04246e+06	1.08509e+06	1.01464e+06	991762	929072	899262	1.46706e+06	1.54594e+06	1.62257e+06	1.55662e+06	1.11168e+06	996968	980070	990844	1021451	968999	995433	1.02396e+06
0	1.09256	45663.59;121505.16	P63094;Q6R0H7	Gnas	Guanine nucleotide-binding protein G(s) subunit alpha isoforms short;Guanine nucleotide-binding protein G(s) subunit alpha isoforms XLas	279684	161173	109191	175338	232640	170941	133458	63154.7	308931	332789	359740	357420	295203	237749	217992	143936	331239	287546	271652	221357
0	1.1843	27771.1	P63101	Ywhaz	14-3-3 protein zeta/delta	5155199	4.98248e+06	4833884	4633600	4858128	4680055	4.39674e+06	4575380	9099895	9265124	9988482	10098650	6829624	5657235	5.7776e+06	5.8498e+06	5392538	5.27967e+06	4.98212e+06	5661769
0	1.10512	83415.7	P63154	Crnkl1	Crooked neck-like protein 1	81457.1	86046.9	66890.2	66839	56967.2	65736.3	64838.1	87868.8	72864.4	58630.2	57785	78346.5	39983	33559.5	19923.4	36199.2	40248	40594.4	38910.8	40912
0	1.17593	24893.8	P63158	Hmgb1	High mobility group protein B1	2.71868e+06	2660837	2.97791e+06	2.93068e+06	2.47107e+06	2.15509e+06	2.51902e+06	2.57289e+06	3.44316e+06	3207898	3.53132e+06	4.26521e+06	2.51417e+06	2.19198e+06	2286816	2.44089e+06	2.59482e+06	2.59032e+06	2.89221e+06	3369219
0	1.06207	11557	P63166	Sumo1	Small ubiquitin-related modifier 1	38700.7	46067.9	42425	56349.9	24875.3	41528.1	32197.3	41407.5	46792.7	68346.4	52714.3	50481.8	41714.2	26031	45164.7	39781.7	39501.1	24289.4	17242.1	34659.1
0	1.16079	10365.9	P63168	Dynll1	Dynein light chain 1, cytoplasmic	603142	559076	614590	624716	746119	568129	591217	719667	756649	726697	825550	680868	700139	779134	689563	604836	682739	679082	639984	238704
0	1.04928	7850.14	P63213	Gng2	Guanine nucleotide-binding protein G(I)/G(S)/G(O) subunit gamma-2	39263	41208.9	9311.89	8196.56	22059.8	18896.2	11371.5	23101.4	76455.3	84648.1	129349	166894	15683.3	18389.8	40757.2	30227.6	16759.7	25156.6	32174.2	59525.4
0	1.17827	16832.2	P63242	Eif5a	Eukaryotic translation initiation factor 5A-1	2.27972e+06	2165343	1.93032e+06	1.85274e+06	1.99114e+06	1.97035e+06	1.53542e+06	2.53496e+06	2.92586e+06	2.87367e+06	2.95151e+06	3.35913e+06	2630235	2424826	2877133	1.75663e+06	2.34458e+06	2.4129e+06	2.36671e+06	3.1005e+06
0	1.14876	8549.81	P63254	Crip1	Cysteine-rich protein 1	227675	160037	160486	175597	171486	168948	147037	197761	440122	462422	446903	459909	320585	228458	210382	155257	317730	178265	216446	275969
0	1.12315	13193.18;13194.12	P63271;Q9Z199	Supt4h1a;Supt4h1b	Transcription elongation factor SPT4-A;Transcription elongation factor SPT4-B	563532	654495	627386	673164	599646	608818	591731	793530	569823	606889	718534	727130	450220	476067	351185	496688	330142	355658	356260	423634
0	1.17424	15524.1	P63276	Rps17	40S ribosomal protein S17	2.88343e+06	3002070	3.42718e+06	3.2475e+06	3.26218e+06	3.27548e+06	3.12617e+06	3.38257e+06	3.82651e+06	3.58284e+06	3.71797e+06	4.16456e+06	3.62003e+06	3175068	3.2236e+06	3013197	3.56726e+06	3.67764e+06	3.44325e+06	3712213
0	1.15238	18006.8	P63280	Ube2i	SUMO-conjugating enzyme UBC9	269509	293031	285967	299756	282562	364301	378871	336198	289224	352586	335441	235844	199406	179806	207942	331939	119785	112507	153497	141200
0	1.13039	23552.8	P63321	Rala	Ras-related protein Ral-A	105008	115881	124194	136241	120927	144746	105174	110953	103949	101575	135842	165038	81035	71461.7	15623	78492.2	77491.4	69645.5	76177.8	79450.5
0	1.1602	14514.9	P63323	Rps12	40S ribosomal protein S12	1.84354e+06	1.55631e+06	1.59268e+06	1.49615e+06	1.55963e+06	1.70138e+06	1.43065e+06	1.58206e+06	1.69038e+06	1.63561e+06	1.88721e+06	1.88254e+06	1588986	1.35193e+06	1.59962e+06	1.38236e+06	1.53348e+06	1.57158e+06	1.34301e+06	1.48151e+06
0	1.18486	18915.7	P63325	Rps10	40S ribosomal protein S10	6228857	5857572	5331651	4.92616e+06	5.13532e+06	5.32195e+06	4.38145e+06	4292920	6210318	5908752	6.71036e+06	6.22372e+06	5.55991e+06	5040443	5.30825e+06	5.04365e+06	5897687	5.78599e+06	5.59435e+06	5526100
0	1.16814	35608.2	P63330	Ppp2ca	Serine/threonine-protein phosphatase 2A catalytic subunit alpha isoform	710518	683426	689133	629738	684487	730153	679570	737815	767520	814216	819380	784919	784708	793433	629069	734838	610482	624086	589953	563692
0	1.1851	29820.1	P67778	Phb1	Prohibitin 1	12149370	12406013	12459088	10871813	10515318	12005070	11564157	10119086	9935003	10137841	8.31486e+06	9563034	10155673	10433956	10603157	10483760	11057295	10632864	11444757	11035404
0	1.13525	24942.4	P67871	Csnk2b	Casein kinase II subunit beta	260990	267042	265147	243785	250114	239199	252460	310562	235198	197694	258328	281037	278518	274222	192238	239267	279706	247501	243843	241448
0	1.17572	14758.9	P67984	Rpl22	60S ribosomal protein L22	4.06086e+06	3.33336e+06	3.06672e+06	3655120	3.49725e+06	4.09235e+06	3.25397e+06	4.83646e+06	3.71947e+06	3.42742e+06	4324594	4300813	3.63775e+06	3308107	3323903	2.37255e+06	3.75962e+06	3.92907e+06	2994366	4.4767e+06
0	1.10937	42019	P68033	Actc1	Actin, alpha cardiac muscle 1	31078.4	15636	11107.4	27746.5	22893.2	18882	10919.2	56172.1	123065	57393	196811	357898	156739	106524	33590.8	18082.5	231181	213413	85052.8	186889
0	1.16175	17861.6	P68037	Ube2l3	Ubiquitin-conjugating enzyme E2 L3	1.06912e+06	972361	886518	982801	863151	1.1009e+06	1.02847e+06	810429	1.00779e+06	1.15403e+06	1013909	1.01211e+06	750941	811673	1.03556e+06	1.14735e+06	695860	691523	726925	715208
0	1.18686	35076.7	P68040	Rack1	Receptor of activated protein C kinase 1	12821502	12903823	11840417	11730833	12026197	13075941	11925041	12185680	12292920	11698946	13914541	12462560	11104885	10577394	10655938	10541825	10651938	11157224	10392885	10664709
0	1.14604	40707.8	P68181	Prkacb	cAMP-dependent protein kinase catalytic subunit beta	84500	73676.3	94244.8	138744	144631	136142	124023	144398	165538	161513	203377	176005	183820	176833	142052	123469	146814	175552	148201	129722
0	1.15728	27778.3	P68254	Ywhaq	14-3-3 protein theta	2.02618e+06	1.84774e+06	1.89776e+06	2.09765e+06	1982555	2.19024e+06	1.90585e+06	1849438	3.31929e+06	3.39487e+06	3.26641e+06	3.01558e+06	2.40927e+06	2.02923e+06	2.08725e+06	2.39018e+06	2.07187e+06	2.0758e+06	2.06868e+06	2.33903e+06
0	1.15993	49924.4	P68368	Tuba4a	Tubulin alpha-4A chain	2.15076e+06	1.96292e+06	1.96525e+06	1.94394e+06	2150436	2026073	2240194	2.44995e+06	1.7323e+06	1682557	1.63919e+06	1.92893e+06	1.71297e+06	1.48487e+06	1.58261e+06	1.48433e+06	1743929	1.95437e+06	1.92349e+06	1.9588e+06
0	1.18791	49831	P68372	Tubb4b	Tubulin beta-4B chain	7.05519e+06	6986888	6.76127e+06	6.80019e+06	7.10026e+06	6493991	6545390	6568868	8679409	8458566	10220101	9790467	7.81948e+06	7.37774e+06	6.6768e+06	6.80959e+06	6.58318e+06	6840959	6105746	6802689
0	1.11658	49909.3	P68373	Tuba1c	Tubulin alpha-1C chain	262580	250211	157781	360595	267685	360547	260956	338046	541455	433517	433461	411228	264966	240431	127288	257567	133783	147924	93416	87948.7
0	1.17929	28211.7	P68510	Ywhah	14-3-3 protein eta	2.13127e+06	1.98918e+06	1.91452e+06	2.0259e+06	2.07214e+06	2.20018e+06	1962456	2.41036e+06	4596331	4262954	5020043	4.38703e+06	3.29191e+06	2.84764e+06	2.64669e+06	2.87452e+06	2.19489e+06	1.99888e+06	2.00273e+06	1.93517e+06
0	1.15176	28780.5	P70122	Sbds	Ribosome maturation protein SBDS	599668	540508	527348	517388	517667	541700	545106	510062	667093	698621	742667	763282	569319	508490	557696	546153	575725	571595	591073	597730
0	1.00584	49857.9	P70158	Smpdl3a	Acid sphingomyelinase-like phosphodiesterase 3a	65749.4	63267.6	82347	89508	43376.7	37468.5	53205	34828	73566.6	62545.2	60387	59543.5	39783	40802.7	51628.7	43688.1	50995	33703.5	48116.5	46176.2
0	1.14873	97184.1	P70168	Kpnb1	Importin subunit beta-1	552160	506289	532591	575007	601547	614657	581885	592253	854833	854442	966913	843387	674566	711293	698499	679776	540550	552566	553947	556994
0	1.14851	61268.7	P70194	Clec4f	C-type lectin domain family 4 member F	1.28658e+06	845816	1.1636e+06	1.02868e+06	1.22014e+06	1.40075e+06	1.08188e+06	1.13008e+06	1.62514e+06	2380870	2.08771e+06	1.81343e+06	1.25617e+06	1.08343e+06	1428378	1.51184e+06	1.03103e+06	1.10055e+06	698253	1.30534e+06
0	1.15697	29891.4	P70195	Psmb7	Proteasome subunit beta type-7	2104848	2.08434e+06	1.85179e+06	2.09385e+06	1.90192e+06	2.04317e+06	1.9134e+06	2.11174e+06	2.33695e+06	2.27149e+06	2.01279e+06	2.08708e+06	2.06994e+06	1.84206e+06	1.67936e+06	1884168	1707295	1.76019e+06	1.66021e+06	1.65812e+06
0	1.10632	25491.8	P70202	Lxn	Latexin	58346.2	63618	25703.9	34975.3	50852.9	47410.7	56808.7	51633.2	126096	112660	110337	131877	72546	22385.5	14312.7	51312.2	39564.2	35046	35164.8	56388.5
0	1.14209	26214.8	P70245	Ebp	3-beta-hydroxysteroid-Delta(8),Delta(7)-isomerase	834380	845420	822810	927746	955125	1.11688e+06	1.13129e+06	1182539	645992	593579	637796	657483	754283	885067	697706	1.04089e+06	799072	909161	1.00172e+06	1.1047e+06
0	1.05309	125947	P70248	Myo1f	Unconventional myosin-If	22182.6	25065.9	68480.6	48344.6	51771.3	39626.7	45334	32953.5	50978.1	57879.3	80594.1	74628.4	12352.2	53972.8	23226.2	31733.4	35024.3	47389.7	41132.4	46375.4
0	1.10524	96739.9	P70261	Pald1	Paladin	43302.6	47790.4	50919	39914.8	31681.9	45848.9	35783.3	21771	53859	65456	59965.7	53652.3	38750.8	34480.1	36574.2	42882	32551.6	27982.8	30683.2	28799.9
0	1.1557	54849.4	P70266	Pfkfb1	6-phosphofructo-2-kinase/fructose-2,6-bisphosphatase 1	828746	958930	1.09112e+06	1.53568e+06	1.74273e+06	2227652	1.67614e+06	1.62251e+06	1.28322e+06	1.3136e+06	1.50296e+06	1.1861e+06	1.78248e+06	1.98606e+06	1529312	1.90243e+06	1.66887e+06	1.78163e+06	1.64668e+06	1.28775e+06
0	1.09271	42705.6	P70274	Selenop	Selenoprotein P	149339	143379	110423	75690.5	72007.2	87744	72779.4	62409.5	79968.8	83579.5	85320.1	69543.5	61552.3	58749.5	82755.8	66581.4	79910.8	64908.8	85208.5	89833.5
0	1.08198	55302.1	P70288	Hdac2	Histone deacetylase 2	29751.5	46908.8	49340.3	46827.5	41909.4	58488.6	66065.6	86789	50783.3	42021.7	44097.5	53754	37727.7	32487	35049	34885.3	35627.2	42055.2	46079.6	51254
0	1.13119	52227.2	P70290	Mpp1	55 kDa erythrocyte membrane protein	288006	270849	250373	166863	195458	211423	124649	206538	281236	337054	285965	319248	179798	163216	140658	150399	165607	150063	123433	169844
0	1.07847	46121.3	P70295	Aup1	Lipid droplet-regulating VLDL assembly factor AUP1	63712.1	85158.9	71663.8	115379	99582.1	95732.7	88369.7	79977.6	87322.6	82077.8	119715	84666.1	110088	87623.7	81800.2	77006.3	118415	111894	96123.1	87359.4
0	1.18041	20830.4	P70296	Pebp1	Phosphatidylethanolamine-binding protein 1	7.63624e+06	7.00591e+06	6610114	8.33348e+06	7561424	8828314	7.22913e+06	5.75319e+06	6362494	6227935	6374520	6.6342e+06	6733629	7.71571e+06	6.998e+06	7.64473e+06	7029009	7.33703e+06	6.7985e+06	5.87823e+06
0	1.0746	59771.2	P70297	Stam	Signal transducing adapter molecule 1	54133.9	58113.9	61398	64579	55268.8	58437.5	56558.9	56460.8	67889.3	71233.1	66926.3	74050.8	65953.7	63211.3	63289.6	66883.8	38244.9	51046.9	60620.4	63302.7
0	1.11632	77566.6	P70302	Stim1	Stromal interaction molecule 1	168568	158563	134530	124029	141664	137597	101977	102000	124186	122183	151782	122388	113397	106474	121631	129950	114555	117678	121866	118728
0	1.11361	65514.4	P70303	Ctps2	CTP synthase 2	206660	111405	149516	134018	67496.2	72064.9	236142	159044	209344	215925	269812	264814	134206	45679.4	146676	135564	29292.7	73697.1	20398.6	86388.9
0	1.12098	43388.7	P70318	Tial1	Nucleolysin TIAR	283460	269879	275946	249928	260059	253194	253019	255221	354221	286208	407520	399510	277672	242429	226702	277283	253937	277713	284359	262503
0	1.12937	49279.6	P70333	Hnrnph2	Heterogeneous nuclear ribonucleoprotein H2	401751	377651	436082	335960	290783	281517	281815	310699	411834	348313	436258	537600	309363	260799	268391	267537	327023	336016	337317	397295
0	1.09464	158171	P70335	Rock1	Rho-associated protein kinase 1	95338.4	86013.6	66104.9	66296.4	82378.1	102688	85905.6	59737.7	109991	120326	109426	112206	73489	72183.2	38328.5	67530.9	76338	78351.8	59353.2	68306.2
0	1.19836	13776.9	P70349	Hint1	Adenosine 5'-monophosphoramidase HINT1	8611688	8068338	8329177	8562620	7.70498e+06	9379801	9258977	9572737	8815341	9454530	8384937	9126408	7.52637e+06	6764550	7007507	7.86959e+06	8205278	8476741	7565762	8648606
0	1.09103	34481.4	P70362	Ufd1	Ubiquitin recognition factor in ER-associated degradation protein 1	799897	757279	649861	651506	588993	583703	463401	460517	754935	699810	796312	835006	786727	700561	444568	575011	569012	650548	512050	487283
0	1.15268	36169	P70372	Elavl1	ELAV-like protein 1	753004	732903	774499	736913	600796	779624	815110	1.07846e+06	661221	505062	744296	743978	485956	418766	454257	549689	487922	449661	501980	539286
0	1.12822	290711	P70398	Usp9x	Probable ubiquitin carboxyl-terminal hydrolase FAF-X	348054	356625	374069	405723	413625	390916	415551	387163	446351	490156	494562	476414	388307	385829	373587	385155	388689	407655	408775	424131
0	1.14566	42785.4	P70404	Idh3g	Isocitrate dehydrogenase [NAD] subunit gamma 1, mitochondrial	513151	626298	582536	434318	430351	477677	544319	498069	491470	501137	464982	437807	491637	495040	528185	521090	574162	470211	528976	529842
0	1.1198	44337.4	P70429	Evl	Ena/VASP-like protein	16527.3	37553.4	15909.1	28562.8	45330.7	12443.8	24280	14128.8	112992	157826	137568	131040	21220.1	24302.2	24922.1	27248	14337.1	19020	13923.1	32177
0	1.17363	38600.1	P70441	Slc9a3r1	Na(+)/H(+) exchange regulatory cofactor NHE-RF1	2.74323e+06	3.00231e+06	2.33591e+06	3.15142e+06	3280670	3373240	3.48414e+06	2.91065e+06	2.80458e+06	2.9465e+06	2.57352e+06	2.99041e+06	3.21377e+06	2765514	3.1877e+06	3055351	3.36148e+06	3.31368e+06	3.49691e+06	3.2932e+06
0	1.13004	34165	P70452	Stx4	Syntaxin-4	41264.7	22497.6	73938.9	29626.2	32930.7	50565.2	30524.9	41120.3	167695	190473	195259	91894.2	138288	57348.1	40991.8	64770.5	63047.5	141421	162158	84305.7
0	1.13689	39666.6	P70460	Vasp	Vasodilator-stimulated phosphoprotein	139849	132663	121455	101284	61489.8	107752	113559	87834.9	343077	387862	317069	373401	182188	120832	163161	115519	94182.2	109224	66716.8	113147
0	1.13176	60775.4	P70665	Siae	Sialate O-acetylesterase	285875	293658	262238	297663	277635	265322	259606	295044	324820	364832	355253	305256	269013	302429	364561	269848	305848	338065	340104	310833
0	1.16782	220499.36;23383.89	P70670;Q60817	Naca	Nascent polypeptide-associated complex subunit alpha, muscle-specific form;Nascent polypeptide-associated complex subunit alpha	2.63244e+06	2.44912e+06	2.24428e+06	2.00078e+06	1.82396e+06	2098867	1.70527e+06	2.02493e+06	1837942	1.79928e+06	2283294	2.06863e+06	1.75704e+06	1.63824e+06	1.86782e+06	1.71707e+06	1.68019e+06	1.88584e+06	1693793	1.79808e+06
0	1.11195	46852.2	P70671	Irf3	Interferon regulatory factor 3	617574	704641	612813	709894	852405	833729	712245	899774	537598	558740	399292	428618	520412	594701	395371	508238	572456	568053	545831	548664
0	1.12693	31474.8	P70677	Casp3	Caspase-3	88875.6	94327.3	83572.3	87828.5	87616.6	104313	102497	94445.9	167767	138623	169448	140184	155035	127264	133066	136206	97056.8	120605	109047	122954
0	1.21527	37047.7	P70694	Akr1c6	Estradiol 17 beta-dehydrogenase 5	34222480	34140408	34230408	35304088	43735440	48171764	47845092	50188612	42921184	43943164	40650492	46159216	44319200	42611660	38462808	39346228	49732256	51735640	47409060	39241256
0	1.15424	40691.8	P70697	Urod	Uroporphyrinogen decarboxylase	1.39012e+06	1205816	1.21222e+06	1.21547e+06	1.39069e+06	1.35154e+06	1.21596e+06	1.23249e+06	1.31522e+06	1.19318e+06	1.32193e+06	1.38228e+06	1399314	1.21044e+06	1.0821e+06	1.08626e+06	1330737	1356251	1.1697e+06	968451
0	1.11358	66682.4	P70698	Ctps1	CTP synthase 1	183247	247454	132484	91910.9	90546.3	63519.8	92630.1	52566.2	443498	384035	682994	538247	227671	216099	118237	185344	64154	71139	75920.9	63147.8
0	1.14237	106248	P70699	Gaa	Lysosomal alpha-glucosidase	3.92294e+06	3883206	3.80661e+06	3.73182e+06	2.74189e+06	2790046	2.574e+06	2928506	1.819e+06	1.85935e+06	1563824	1.69721e+06	1849773	1.73026e+06	1718507	1.77763e+06	3.24598e+06	3.17752e+06	3.01305e+06	2.62732e+06
0	1.16769	59652.2	P80313	Cct7	T-complex protein 1 subunit eta	1812700	1.55934e+06	1.67136e+06	1.88386e+06	2.28309e+06	2.0819e+06	1992827	2.15977e+06	2.43875e+06	2.11366e+06	2.60152e+06	2.28551e+06	2.65299e+06	2.47154e+06	2.1125e+06	2.11198e+06	2527655	2.42319e+06	2.35547e+06	2.32111e+06
0	1.17844	57477.2	P80314	Cct2	T-complex protein 1 subunit beta	1225363	1163926	1.07309e+06	1.20036e+06	1353252	1.33826e+06	1.37779e+06	1.31221e+06	1.39183e+06	1.17417e+06	1.41481e+06	1.3136e+06	1.50365e+06	1.39324e+06	1.28247e+06	1.2715e+06	1.38624e+06	1.29345e+06	1.28326e+06	1.24306e+06
0	1.15765	58066.4	P80315	Cct4	T-complex protein 1 subunit delta	5.17226e+06	5218925	5.19885e+06	6325384	6.40711e+06	6.76893e+06	7098033	7.29774e+06	6.36167e+06	5.72367e+06	6485573	5.95272e+06	6966039	6.71259e+06	6525022	6467646	5908380	6.05371e+06	6440352	5.76985e+06
0	1.15952	59624.1	P80316	Cct5	T-complex protein 1 subunit epsilon	1.12745e+06	1.12087e+06	1.08134e+06	1.27198e+06	1330290	1.39363e+06	1.32776e+06	1.42017e+06	1.38817e+06	1.20627e+06	1.46393e+06	1.30935e+06	1.49326e+06	1.44534e+06	1.44274e+06	1.32247e+06	1.46932e+06	1.44726e+06	1.40212e+06	1.38923e+06
0	1.16085	58004.3	P80317	Cct6a	T-complex protein 1 subunit zeta	1.0579e+06	1.00345e+06	1.00096e+06	1.13585e+06	1.24472e+06	1.24214e+06	1.22772e+06	1.2517e+06	1.33978e+06	1.11282e+06	1319834	1249245	1.28959e+06	1.26937e+06	1.20398e+06	1.17679e+06	1236490	1.21661e+06	1.17664e+06	1.13472e+06
0	1.17569	60630	P80318	Cct3	T-complex protein 1 subunit gamma	2.43635e+06	2.37461e+06	2.36337e+06	2.78163e+06	2.74037e+06	3.1498e+06	3.07616e+06	3.24205e+06	3046677	2489130	3125000	2.73822e+06	3.2089e+06	2935516	2877628	2831240	2.81001e+06	2741427	2.78366e+06	2.6537e+06
0	1.02682	50304.5	P81117	Nucb2	Nucleobindin-2	22300.5	27295.7	15604.9	29692.3	21548.3	35903.4	28884	48639.4	101698	116698	121345	140751	53799.5	25690.6	40536.5	30484.4	38797.4	8347.37	9128.64	23274.2
0	1.09537	74597	P82198	Tgfbi	Transforming growth factor-beta-induced protein ig-h3	41914.3	57734.1	51088	28033.7	69909.3	55003.8	28690	66872.8	173247	187465	244297	216366	92072.4	69011.4	66758.8	46322.7	97543.6	68560.7	58377.2	170094
0	1.09045	48509.7	P82343	Renbp	N-acylglucosamine 2-epimerase	47800.4	128882	39180.4	22682.4	30229.4	23291.7	29471.1	13591.3	129657	181864	118280	91878	46042.2	25269.1	15832.1	18616.9	51544	19769.2	17304	66795.6
0	1.06982	83924.9	P83093	Stim2	Stromal interaction molecule 2	11133.6	7533.52	9493.33	9997.48	13660	17076	18180.3	12218.4	33515.4	30901.5	35166.1	28627.9	29831.1	22864.6	27835.1	26676.3	16392.1	15175.7	16042.9	13390.2
0	1.07614	12405.4	P83870	Phf5a	PHD finger-like domain-containing protein 5A	139511	185674	206414	87123.4	123468	72033.9	59632.9	63619.7	285942	214940	301271	358696	224647	185432	190220	94745.4	243226	258881	227236	277975
0	1.16355	12440.8	P83882	Rpl36a	60S ribosomal protein L36a	1.3848e+06	1.44804e+06	1.59104e+06	1.55118e+06	1.67161e+06	1.71634e+06	1.59414e+06	1.58196e+06	1.22146e+06	1.39217e+06	1.39577e+06	1.29921e+06	1.19455e+06	1.16687e+06	1.37823e+06	1.31929e+06	1.09537e+06	1.11305e+06	1.26338e+06	1.09046e+06
0	1.14882	21417.8	P83917	Cbx1	Chromobox protein homolog 1	332558	318944	414382	461502	266016	177400	329641	344654	448647	576842	1.06692e+06	1.15483e+06	188404	191545	326141	599228	205468	255267	602180	664647
0	1.14987	12473.2	P83940	Eloc	Elongin-C	303828	364416	290130	191936	279791	295561	226860	250080	454950	332727	428322	435709	375207	325831	230319	330332	399160	365678	306661	382846
0	1.14544	20529.7	P84084	Arf5	ADP-ribosylation factor 5	358635	323218	140997	126428	179865	140069	149873	132238	262289	263279	172893	229131	285734	209574	155165	187709	212063	200066	145258	151038
0	1.14649	12258.9	P84089	Erh	Enhancer of rudimentary homolog	1.4125e+06	1.49072e+06	1.51375e+06	1.03886e+06	895515	1.23381e+06	1.54321e+06	1.21901e+06	1.9139e+06	1.89445e+06	1.94306e+06	2287245	1435361	1.04326e+06	1.25358e+06	1.22611e+06	1.16567e+06	1.23762e+06	1.21096e+06	1278156
0	1.18806	49654.7	P84091	Ap2m1	AP-2 complex subunit mu	1.93629e+06	1.93762e+06	1.8953e+06	1.71414e+06	1.7515e+06	1.74617e+06	1.65312e+06	1.64434e+06	1.72418e+06	1.66077e+06	2.06143e+06	2052319	1553912	1.45747e+06	1.40433e+06	1.49417e+06	1.6327e+06	1.67356e+06	1.62015e+06	1.60761e+06
0	1.13991	21308.5	P84096	Rhog	Rho-related GTP-binding protein RhoG	331400	239847	225577	196848	202956	233747	170283	185250	712002	793396	759256	782388	401802	336846	265953	256206	248421	262180	235074	288061
0	1.18414	23466	P84099	Rpl19	60S ribosomal protein L19	4.11596e+06	4.49834e+06	4.43799e+06	4.41462e+06	4906876	4635474	4572594	5099008	5447035	5069175	5086366	5367514	5.28655e+06	4582551	4.67416e+06	4.167e+06	4534475	4808218	4362670	4.09212e+06
0	1.13337	19329.6	P84104	Srsf3	Serine/arginine-rich splicing factor 3	1549427	1433221	1378151	1.06318e+06	1.01487e+06	1.13337e+06	1.16262e+06	1.03961e+06	1.75031e+06	1.42768e+06	1.82887e+06	1.98781e+06	1.12707e+06	1.04676e+06	983208	1.06433e+06	982918	1057770	1.19981e+06	1.2782e+06
0	1.06496	15388	P84228	H3c15	Histone H3.2	11991.8	19768.2	107588	197610	20806.5	9832.02	158543	157625	22596.8	19673.8	17340.8	94253	8583.07	16771.7	191227	499095	7857.61	15894.9	279366	136833
0	1.1566	22417.3	P85094	Isoc2a	Isochorismatase domain-containing protein 2A	1.04428e+06	1164397	1.15729e+06	1.04355e+06	1.14531e+06	1213766	1.16194e+06	1.37874e+06	900469	1.0753e+06	669210	813048	788239	1.02683e+06	896488	910517	1.27177e+06	1.07344e+06	1.03002e+06	1165934
0	1.11699	55584.5	P97290	Serping1	Plasma protease C1 inhibitor	696865	634585	548232	465472	359131	324766	240610	259353	292243	286270	239041	242128	271573	246255	265029	277164	336521	379576	292809	396792
0	1.10736	44373.1	P97300	Nptn	Neuroplastin	297688	364840	191743	160179	172382	215310	210944	190067	419733	400712	446743	483482	256589	155038	159553	126194	221847	114230	187388	244262
0	1.10442	92867.1	P97311	Mcm6	DNA replication licensing factor MCM6	9803.91	15746.2	13461.1	11412.2	12158.4	12328.1	13511.1	18311.2	107813	51678.4	113900	51371.7	23125.6	28890	18665.2	20842.7	13822.3	9171.18	7662.83	15754
0	1.10312	20925.8	P97314	Csrp2	Cysteine and glycine-rich protein 2	33354.9	29569.8	55221.3	50020.8	58618	30096.5	34493.1	37462.6	167100	165727	176296	168109	97432.4	67752.1	42213.2	58027.8	31073.5	36302.3	39149.4	65135
0	1.14063	20583.4	P97315	Csrp1	Cysteine and glycine-rich protein 1	211976	142743	178357	160917	126044	126582	108290	119112	327769	370912	358294	295134	211153	146780	127832	153832	200226	110514	215505	207168
0	1.18345	32750.3	P97328	Khk	Ketohexokinase	10398195	8.35819e+06	8.00308e+06	11724169	12779269	12649781	10683219	12778358	11658794	10125013	11639048	8174290	12173021	14552328	11581065	11750128	8981979	11384130	9147666	7673188
0	1.06539	23561.9	P97348	Rhod	Rho-related GTP-binding protein RhoD	127405	167462	185006	113135	111910	90293.6	148493	68191.1	135270	121500	111735	120060	108331	91404.9	129848	76922.4	107596	104819	110176	119965
0	1.18613	29884.8	P97351	Rps3a	40S ribosomal protein S3a	4.4578e+06	4.68757e+06	4.77922e+06	4407588	4.69849e+06	4.50179e+06	4.26213e+06	4581142	5.27039e+06	4.87175e+06	5.59939e+06	5794875	4830433	4.49174e+06	4044389	4200307	4863101	4.91758e+06	4331740	4.61484e+06
0	1.14099	11157.8	P97352	S100a13	Protein S100-A13	124287	134576	140144	142873	136522	132280	153388	172373	113304	117901	96472.9	96563	81005.6	89896.9	104520	119859	85185.6	76449.5	92534.3	96391.1
0	1.14395	62981.6	P97363	Sptlc2	Serine palmitoyltransferase 2	195608	368370	378856	157945	130091	98039.8	252670	186772	777847	713895	743118	609530	241143	103806	146862	262452	177005	151726	16178.4	143577
0	1.16694	47833.6	P97364	Sephs2	Selenide, water dikinase 2	3.21668e+06	2.74827e+06	2.98267e+06	3.27003e+06	3.5358e+06	3.60276e+06	3.15088e+06	3.58547e+06	2.37501e+06	2.58577e+06	2.06024e+06	2.59378e+06	2.81623e+06	2648294	2.51914e+06	2.79657e+06	3.01544e+06	3.02105e+06	3.13648e+06	3105372
0	1.15946	31775.7	P97370	Atp1b3	Sodium/potassium-transporting ATPase subunit beta-3	671142	729426	616078	759882	786065	788211	782360	675663	732719	632434	826961	780322	647632	521320	584645	621557	652914	619610	694764	674172
0	1.16554	28672.9	P97371	Psme1	Proteasome activator complex subunit 1	1.64618e+06	1.58845e+06	1.65855e+06	1780137	2045475	2.08086e+06	1919864	1960233	2761669	2.65716e+06	2.42436e+06	2.52162e+06	2.41483e+06	2.32527e+06	2.12045e+06	2347717	2.05217e+06	2166044	2.03546e+06	2049067
0	1.17212	27057.3	P97372	Psme2	Proteasome activator complex subunit 2	1328509	1.31576e+06	1468500	1.86342e+06	2126715	2.18393e+06	1.89343e+06	2102859	2.10042e+06	2.42828e+06	2129386	2.16796e+06	2.1758e+06	2.28842e+06	2.29714e+06	2.19952e+06	1.7428e+06	1895856	1.78516e+06	1863979
0	1.15805	54088.1	P97379	G3bp2	Ras GTPase-activating protein-binding protein 2	669618	677064	600087	463454	453901	494836	446628	475745	394784	347090	473516	420650	495750	549716	484331	491213	404633	512737	391835	355588
0	1.15928	54079.3	P97384	Anxa11	Annexin A11	327628	259362	193969	299454	400706	382895	292345	396064	438068	425954	496174	461715	401863	349833	307813	298134	416731	412064	278250	334931
0	1.133	65052.8	P97390	Vps45	Vacuolar protein sorting-associated protein 45	95351.2	107611	96092.5	92058.1	86661.2	75734.4	83971.8	62549.9	96512.2	95944.1	101476	112091	96029.7	87609.1	77944.4	83984.7	91756.9	101630	92101.8	91060.9
0	1.00675	425287	P97412	Lyst	Lysosomal-trafficking regulator	5330.14	8350.62	6337.41	3865.64	5384.84	5736.79	3423.79	3141.58	11510.7	9065.96	10432.7	9136.65	6307.19	8657.48	3640.43	5351.25	7075.66	7348.33	4961.53	5489.71
0	1.11193	17620.4	P97425	Ear2	Eosinophil cationic protein 2	54014	55102.7	40559.7	58573.6	44250	57549.3	41765.1	68068.1	232419	127801	162173	126102	61991.2	24445.6	33210.9	10691.3	21168	39725.4	21669.8	44902.3
0	1.17412	35915.7	P97429	Anxa4	Annexin A4	913719	729605	517071	663656	861518	918015	843997	816741	1.84299e+06	2.1117e+06	2.35917e+06	2184901	1.38251e+06	1.01153e+06	1.08408e+06	1.08665e+06	1.03402e+06	945517	834748	942321
0	0.985403	53110.7	P97431	Irf6	Interferon regulatory factor 6	9954.74	7896.1	22817.7	15201.6	7970.61	11868	21089.9	7975.98	9548.47	6266.36	7966.95	7220.29	3437.44	12693	9777.54	8664.47	19104.2	18166.4	14796	13353.7
0	1.05665	116408	P97434	Mprip	Myosin phosphatase Rho-interacting protein	27342	13028.8	19610.7	14228.5	10643.4	11420.7	13222.6	15049.5	14103.8	21778.9	25389.4	26028.3	9207.01	9050.75	20271.2	13670.6	8256.9	7616.12	12176.8	6537.39
0	1.14531	31888.7	P97447	Fhl1	Four and a half LIM domains protein 1	161868	185028	184054	157806	209116	191726	177106	216734	218987	258733	212850	184930	179800	142142	153909	167513	266935	116113	188803	177098
0	1.14512	109651	P97449	Anpep	Aminopeptidase N	888171	815407	985268	796613	884083	879769	875669	953748	915815	1.04252e+06	955712	1.18428e+06	919979	908508	788768	846597	989279	951002	954034	985957
0	1.15328	12496.4	P97450	Atp5pf	ATP synthase-coupling factor 6, mitochondrial	3.36622e+06	4289686	3.52201e+06	3253752	3.15145e+06	3163169	3.44744e+06	3.25797e+06	3.43687e+06	3.21536e+06	2.87431e+06	3.39848e+06	3277070	3.15734e+06	2873070	2.63042e+06	3.74575e+06	3330477	3.50955e+06	3778162
0	1.17849	22889.4	P97461	Rps5	40S ribosomal protein S5	5923202	5.67861e+06	6.7298e+06	6618650	7126941	6833932	6232016	6695931	7363011	6779667	8028960	7.24077e+06	7.19449e+06	6262074	6.30169e+06	5982208	6.44987e+06	6732289	6.14092e+06	6.36298e+06
0	1.11791	35079.9	P97470	Ppp4c	Serine/threonine-protein phosphatase 4 catalytic subunit	558815	540316	556983	508317	444845	519308	412556	515532	754143	737632	797287	715080	514553	450688	372182	464088	267826	340225	351746	4185.49
0	1.09597	24041.6	P97478	Coq7	5-demethoxyubiquinone hydroxylase, mitochondrial	287740	300621	344126	297690	282975	269603	303894	231392	369064	383960	316479	332743	301143	318265	320855	303630	234877	226304	239140	338332
0	1.11295	18255.2	P97493	Txn2	Thioredoxin, mitochondrial	214706	214518	197574	238320	194289	255104	292824	210172	142473	137800	122978	82158.6	84769.5	97508.9	111200	165032	70180.5	64729.2	85185.7	81308.2
0	1.17894	72571.3	P97494	Gclc	Glutamate--cysteine ligase catalytic subunit	1.98154e+06	1.77129e+06	1.88363e+06	2.13544e+06	2278205	2334267	2295219	2102245	4301138	4330459	5.30194e+06	5767859	3.16812e+06	2.76002e+06	2.68079e+06	2.73541e+06	2.97523e+06	3.07768e+06	2.51666e+06	2.7481e+06
0	1.0413	291460	P97499	Tep1	Telomerase protein component 1	13288.9	16281.2	12278.6	14228.4	11903.5	13210.2	12370.1	7247.81	23996	35160.1	35269.6	23948.5	15639.4	16451	15494.8	16090.8	8932.99	11608.4	6233.22	7763.56
0	1.15729	60516	P97501	Fmo3	Dimethylaniline monooxygenase [N-oxide-forming] 3	31427.4	22369.8	29674	27454	24646.5	30588.5	21747.7	22449.3	746103	933310	210043	175372	21412.6	75749.1	39912.3	38845.5	23607	18682.6	25098.1	24888.2
0	1.15579	88251.5	P97742	Cpt1a	Carnitine O-palmitoyltransferase 1, liver isoform	4.46103e+06	4.45419e+06	4.77375e+06	2.95066e+06	2333789	2.94104e+06	2.63398e+06	2.61127e+06	1.94228e+06	1.82312e+06	1.88462e+06	2200977	1.85061e+06	2.24542e+06	2.29867e+06	2.76516e+06	1915051	2.01513e+06	2.47119e+06	2.73817e+06
0	1.05114	31443.2	P97760	Polr2c	DNA-directed RNA polymerase II subunit RPB3	100815	108085	105184	87909.9	64320.6	54922	74348.4	70145.8	113277	78168.7	135940	147956	90636.2	75770.1	36344.9	95238.3	83809.2	84267.2	70009.9	89676.8
0	1.14807	28032	P97765	Wbp2	WW domain-binding protein 2	337688	255989	333860	298069	296770	280187	348529	176968	547616	528138	568739	465537	429443	409193	342172	393404	359590	386899	361696	380531
0	1.10251	56431.1	P97770	Thumpd3	tRNA (guanine(6)-N2)-methyltransferase THUMP3	107138	93225	91603.1	66057.4	76760.1	67318.6	60632.5	35821.1	148288	140362	161616	160222	104589	102459	108550	85810.9	125472	123103	100209	116413
0	1.10974	39947.6	P97792	Cxadr	Coxsackievirus and adenovirus receptor homolog	324913	455669	449576	402099	353467	254671	347140	288299	489371	475557	640445	500895	411657	415854	307913	445904	296093	338539	312579	303192
0	1.04465	56413.9	P97797	Sirpa	Tyrosine-protein phosphatase non-receptor type substrate 1	40651.3	32075.5	17603.9	15460.2	23506.8	13787.4	13084	19224.4	96178.6	97930.5	111092	108807	28089.3	18248.9	8694.29	16371.4	15126.4	11306.9	15310.2	5600.23
0	1.20349	54356.7	P97807	Fh	Fumarate hydratase, mitochondrial	12072045	12270980	12007618	9648682	8.1135e+06	8449484	8640082	9252760	7.5298e+06	7032591	6340454	6.52656e+06	7.77621e+06	8.36174e+06	7.87788e+06	7.78181e+06	7778172	7.64899e+06	7051101	9904524
0	1.12625	89559.8	P97819	Pla2g6	85/88 kDa calcium-independent phospholipase A2	46927.9	40873.4	62355.6	52118.5	52670	80553.2	62206.6	85989.7	81113.7	55536	79931.5	71699.7	60210.8	58845.5	57474.1	80967.4	78208.4	80637.1	86301.7	51345.9
0	1.15187	52376.4	P97821	Ctsc	Dipeptidyl peptidase 1	1150761	1.33674e+06	952409	1.38276e+06	985643	937122	954961	1064274	1.61648e+06	1.81689e+06	1.50013e+06	1.74123e+06	750805	660032	799818	740186	907296	974398	758647	979365
0	1.03719	29622.5	P97822	Anp32e	Acidic leucine-rich nuclear phosphoprotein 32 family member E	63335.8	83910.3	60938.2	6518.4	67699.7	18335.9	39725.7	15025	109840	68805.3	117984	116143	56372	53761.6	52236.9	20627.5	59563.4	48898.5	31075.1	27851.9
0	1.16946	24687.7	P97823	Lypla1	Acyl-protein thioesterase 1	2.06833e+06	1.92739e+06	2.21208e+06	1807672	1.87189e+06	1.8203e+06	1.61867e+06	1.82307e+06	1.88397e+06	1.85635e+06	1.64427e+06	1.70105e+06	2.26892e+06	2164142	2.22793e+06	2.04634e+06	2337652	2297023	2.07986e+06	2250817
0	1.08735	16080.6	P97825	Jpt1	Jupiter microtubule associated homolog 1	20662.6	19161.1	22431.1	16714.2	25379.4	22163.5	15156.8	20458.2	96695.8	81231.2	111007	99951.4	46654.3	45324	12080.1	30611.7	35267.1	25866.4	28723.3	24911.4
0	1.13949	51828.8	P97855	G3bp1	Ras GTPase-activating protein-binding protein 1	1.16562e+06	1.10614e+06	1.06148e+06	938893	816084	933054	903317	889171	1.16496e+06	1.10651e+06	1.37219e+06	1211032	867533	917765	950990	938594	772903	531326	864507	872829
0	1.11204	63506.8	P97863	Nfib	Nuclear factor 1 B-type	44763.2	80671.4	68533	62703.3	73741.6	71823.1	138341	102067	36840.9	56475.7	57952.9	49457.2	46351.9	56624	50809.7	65155	41927.6	59030.6	48084.8	127950
0	1.01061	34060.6	P97864	Casp7	Caspase-7	32225.8	16692.7	28510.7	25246.2	21648.4	8226.04	17823.5	6300.59	87916.6	62215.5	85895.1	87368.6	71654.2	78911.4	40708.5	36314.2	46959.8	41264.5	26194.8	45875
0	1.11288	35501.9	P97865	Pex7	Peroxisomal targeting signal 2 receptor	63316.4	73399.7	68141.1	65108.3	66798.8	83307.7	84550.9	63967.7	61840.7	73050.6	63141.5	45890	87892.1	106881	110268	99301.2	73060.3	79658	101311	80512.1
0	1.14257	199587	P97868	Rbbp6	E3 ubiquitin-protein ligase RBBP6	384774	355719	431008	542331	513690	651290	759768	808955	402689	525057	402492	432003	336950	401626	444040	443194	352384	341310	477878	337513
0	1.18668	60000.6	P97872	Fmo5	Flavin-containing monooxygenase 5	14254680	12582769	12748994	17841710	19701496	20706730	22281924	21458016	47071992	45249528	47654104	56449976	34839692	36706256	35220204	33281388	20492296	23856266	25350008	26680302
0	1.1067	23914.5	P97930	Dtymk	Thymidylate kinase	150450	172267	133030	125521	167011	73890.4	153561	134716	263998	255289	251175	187593	181654	199657	189087	122022	115740	103972	132619	143888
0	1.10127	25974.4	P98086	C1qa	Complement C1q subcomponent subunit A	16812.9	11043.8	9550.39	5860.92	10200.7	11028	11467.5	11727.8	20321.9	30560.1	32117.9	29931.3	11062.8	9221.04	11692.7	11882.4	5187.38	8412.34	10675.9	14237.1
0	1.04706	76869.7	P98192	Gnpat	Dihydroxyacetone phosphate acyltransferase	9435.69	12791	15937.8	8077.51	16437.7	7586.44	10186.5	3734.97	16052.9	7144.02	5958.85	4881.86	5018.36	8615.04	19831	15644.4	7643.69	22371.6	9045.52	7133.31
0	1.15786	49670.8	P99024	Tubb5	Tubulin beta-5 chain	3400031	3.47042e+06	2.99696e+06	2329620	2.83738e+06	2549421	2.33061e+06	2.40712e+06	5461907	5014109	6.37735e+06	5645423	4.35454e+06	3.82108e+06	3520224	3.60624e+06	3.522e+06	3.75193e+06	2.9401e+06	3.8893e+06
0	1.15635	9584.11	P99025	Gchfr	GTP cyclohydrolase 1 feedback regulatory protein	1.90976e+06	1.79897e+06	2.06778e+06	2.38217e+06	2194852	1.63395e+06	1971505	1.71009e+06	2225887	2.22396e+06	1.92244e+06	2.20314e+06	2.03023e+06	2.22929e+06	2102875	1.9794e+06	2.27196e+06	3.02998e+06	2.30143e+06	2.55476e+06
0	1.16795	29116.1	P99026	Psmb4	Proteasome subunit beta type-4	1.41834e+06	1.42231e+06	1.35987e+06	1.47223e+06	1.45959e+06	1.52809e+06	1527985	1.53879e+06	1.62825e+06	1.5583e+06	1.55589e+06	1.55765e+06	1.54866e+06	1.43259e+06	1.45185e+06	1.36773e+06	1.3331e+06	1433997	1.29117e+06	1.24995e+06
0	1.15868	11650.9	P99027	Rplp2	60S acidic ribosomal protein P2	2.97432e+06	3.13947e+06	2.7158e+06	2.59508e+06	2.35373e+06	2.99721e+06	2.71476e+06	2.5164e+06	2.88976e+06	2.5598e+06	2.61212e+06	2.96942e+06	2.22938e+06	2.02085e+06	2.50773e+06	2.36644e+06	2460947	2.55506e+06	2.41903e+06	2.96314e+06
0	1.16864	10434.6	P99028	Uqcrh	Cytochrome b-c1 complex subunit 6, mitochondrial	4514657	5.27718e+06	4.43671e+06	3.86786e+06	4282511	3.75938e+06	3.79734e+06	3.3815e+06	3.71284e+06	3.31997e+06	2.84615e+06	3.57813e+06	4262803	4423764	4419400	4.18506e+06	5024921	4940317	4.94745e+06	5.04734e+06
0	1.20925	21897.5	P99029	Prdx5	Peroxiredoxin-5, mitochondrial	17050562	17691592	15333935	16583824	17042418	17556542	18251216	18804008	18838716	20556590	21307436	22088574	16278956	17557398	14214782	14910815	16966790	17343758	16580465	16513054
0	1.02952	51344.4	Q00422	Gabpa	GA-binding protein alpha chain	15723.2	17748.7	16881.2	12283	10709.6	9611.49	11878.3	9889.81	13946.1	17008.7	16053.7	12829.4	11073.3	9057.98	10959.2	12171	6740.98	9537.05	10497.5	9163.65
0	1.17498	146562	Q00519	Xdh	Xanthine dehydrogenase/oxidase	1.47141e+06	1.46241e+06	1.37282e+06	1.75915e+06	1.82955e+06	1.88863e+06	2045284	1953358	3.11443e+06	3215136	2.92749e+06	2.92526e+06	2.2903e+06	2215546	2.21309e+06	2.27365e+06	1.59053e+06	1.68994e+06	1.68042e+06	1.60149e+06
0	1.08088	102451	Q00560	Il6st	Interleukin-6 receptor subunit beta	31520.1	31487.2	22587.7	48229.9	32110.6	22313	23991.9	19304.8	37880	37020	141678	65269.2	26855.3	14222	23555.2	20539.8	25193.2	28591.9	15116.4	19399.8
0	1.15485	59262.6	Q00612	G6pdx	Glucose-6-phosphate 1-dehydrogenase X	307476	341279	344209	233335	240049	197669	181917	247398	1.09043e+06	1.05708e+06	1.12107e+06	1.13241e+06	526278	519803	646896	477300	265561	225954	194403	286496
0	1.19661	30615.5	Q00623	Apoa1	Apolipoprotein A-I	14844714	15220567	11657478	9246575	10612542	7177632	5840931	7631298	4.87164e+06	4965605	4446649	5059696	6422440	5.34692e+06	4.12229e+06	5.1251e+06	6.31829e+06	5390410	6427033	7.10215e+06
0	1.13964	23206.1	Q00724	Rbp4	Retinol-binding protein 4	1.01193e+06	639037	1.07418e+06	599151	503847	575118	541568	416528	614360	583251	547862	569783	566928	535330	415963	640548	523923	468664	576421	526325
0	1.17668	45998.3	Q00897	Serpina1d	Alpha-1-antitrypsin 1-4	6.88857e+06	7.18929e+06	6257079	6.66528e+06	7.59532e+06	5641917	4.76547e+06	5.54541e+06	4.34451e+06	4768661	4.12295e+06	4.78473e+06	4.24552e+06	3814908	2.96803e+06	3.38814e+06	5047699	5.56415e+06	6074801	6.29397e+06
0	1.16201	45891.4	Q00898	Serpina1e	Alpha-1-antitrypsin 1-5	1.05712e+06	1.19918e+06	762183	324621	1.84674e+06	1.47573e+06	826117	1.0064e+06	44522.8	35239.2	43287.3	28935.5	59854.4	29988.5	23173.9	28029	843220	874871	772692	957459
0	1.15446	15846.1	Q00915	Rbp1	Retinol-binding protein 1	293845	385570	340992	177866	331781	406579	397401	399023	1.13559e+06	1.52791e+06	1.31913e+06	1.20379e+06	574733	461847	410871	410460	368855	446209	321681	798055
0	1.14882	84940.2	Q00PI9	Hnrnpul2	Heterogeneous nuclear ribonucleoprotein U-like protein 2	711633	718479	768656	653399	449388	598680	731410	796191	846001	813871	865092	932288	536396	414173	594540	659643	544126	492730	578788	652480
0	1.15914	134853	Q01279	Egfr	Epidermal growth factor receptor	1.25938e+06	1.74207e+06	1.29914e+06	2.03698e+06	1.99082e+06	1.66388e+06	1.79232e+06	1.54244e+06	517582	465624	472439	448756	1536366	518844	1.44627e+06	1.1508e+06	1.50382e+06	1.7819e+06	1.61342e+06	1570018
0	1.18695	38618.8	Q01339	Apoh	Beta-2-glycoprotein 1	1.35659e+06	1.2429e+06	1.16923e+06	1.52716e+06	1.19878e+06	1.09716e+06	932412	1.13407e+06	1.48099e+06	1714666	1.69773e+06	1.79428e+06	1.06579e+06	958758	811658	821034	1.07631e+06	981862	1.24118e+06	1.31678e+06
0	1.16502	86161.8	Q01405	Sec23a	Protein transport protein Sec23A	3659560	3544454	3.36732e+06	2.93793e+06	2.95242e+06	2.94267e+06	2.72908e+06	3.0132e+06	2.73477e+06	2572541	3.23597e+06	3088496	2.96889e+06	2.93632e+06	2.78739e+06	2.87388e+06	2.7448e+06	3.02246e+06	2.65591e+06	2648326
0	1.13689	31550.3	Q01730	Rsu1	Ras suppressor protein 1	564585	565978	529483	460667	472573	470733	439159	500115	563879	628761	599881	601288	391097	356145	352708	390530	337643	295799	329209	373960
0	1.19031	17363.1	Q01768	Nme2	Nucleoside diphosphate kinase B	10940605	9985497	9603259	12031856	13576857	14417819	12616343	14454406	14468582	13663426	14914545	14697593	14175942	12296469	12122641	12368033	13942555	13984342	12326516	12806793
0	1.18571	89321.8	Q01853	Vcp	Transitional endoplasmic reticulum ATPase	10053165	9905311	9349965	10029471	9080606	10035032	9707014	10491618	10098805	9470410	10060474	11114423	10440620	10066954	9646144	9071197	9643898	9738675	8760890	9588753
0	1.15504	28793.5	Q02013	Aqp1	Aquaporin-1	376825	408568	412736	353885	445234	493865	487078	342253	484518	484659	428808	457369	346546	322145	407839	493546	397049	388988	569389	376669
0	1.1747	117809	Q02053	Uba1	Ubiquitin-like modifier-activating enzyme 1	3.4058e+06	3291538	3.14248e+06	3.18835e+06	3.59866e+06	3.60726e+06	3.40019e+06	3.3351e+06	3.96554e+06	3.84791e+06	3.95707e+06	3855579	3818409	3379667	3.0299e+06	3219244	3.53568e+06	3.57678e+06	3.24742e+06	3.28055e+06
0	1.0623	25991.6	Q02105	C1qc	Complement C1q subcomponent subunit C	62995.9	37735.2	25869.6	28662	38617	49530.8	50455.4	52956.5	107209	173341	175848	135092	55115	34394.3	64084.7	59550.3	32029.5	50282.6	51216.8	64593.5
0	1.16062	85470.5	Q02248	Ctnnb1	Catenin beta-1	552970	484743	666578	598151	477705	501269	657450	679002	686484	733820	959590	988554	506594	392495	576780	637541	499547	533327	671809	705666
0	1.15774	81800.8	Q02257	Jup	Junction plakoglobin	919453	721466	1.08972e+06	880656	709705	807651	1.15993e+06	1.24553e+06	910910	993017	1289615	1472315	683270	591154	911592	998419	850435	793750	1.03583e+06	1.19925e+06
0	1.0859	204227	Q02357	Ank1	Ankyrin-1	357826	250273	300600	140993	147148	93600.8	94602.2	132346	127402	152682	81735.4	110701	64790.7	65689.3	58232.3	59483.4	53058.4	53694.1	54907	131468
0	1.08181	58553.2	Q02780	Nfia	Nuclear factor 1 A-type	82070.5	56765.8	110362	87372.3	65531.2	57535.7	83848.2	81372.8	69624.1	61474.6	71704.5	83511	59538.6	43708.5	80735	79984.4	56219.6	61558.3	75106.2	87262.6
0	1.1153	110334	Q02788	Col6a2	Collagen alpha-2(VI) chain	407078	258871	467422	218579	256068	215978	339762	334535	475351	542984	905742	634539	435141	350808	278938	294003	950654	272549	1.10024e+06	648089
0	1.17079	53408.7	Q02819	Nucb1	Nucleobindin-1	460026	357841	351430	880391	942421	919242	969632	964755	956638	854547	1.13201e+06	932400	766808	706878	882606	726764	784800	645086	788274	785244
0	1.11528	59959.2	Q03160	Grb7	Growth factor receptor-bound protein 7	59336.2	43202.5	62486.1	79235.9	90497.6	96990.6	110077	98779.7	115303	110059	122508	118895	140794	130328	131323	133383	139993	144050	124190	132914
0	1.12307	43232.2	Q03249	Galt	Galactose-1-phosphate uridylyltransferase	228295	194941	220750	289447	353503	325038	323127	366329	241584	218574	211670	218070	291228	266681	257181	248346	340244	325004	330546	293598
0	1.20639	59752.6	Q03265	Atp5f1a	ATP synthase subunit alpha, mitochondrial	56151520	57763040	54766892	47373840	48914684	45255728	47001012	48260872	51794120	53140864	45966772	48450868	53060172	51606012	45999956	44856988	55750156	51691788	53272872	55571544
0	1.16019	68462.3	Q03311	Bche	Cholinesterase	282005	241777	318997	289681	281407	296606	337811	331603	585638	554446	626402	583308	462137	553830	460614	404170	304627	342651	323615	471240
0	1.15973	47064.2	Q03734	Serpina3m	Serine protease inhibitor A3M	1.91413e+06	2.21085e+06	1.47828e+06	1.12934e+06	1113354	1.12596e+06	804070	1.15987e+06	500392	583598	384988	543267	526694	254562	510384	553213	580700	517633	530502	609678
0	1.08419	60211.9	Q04207	Rela	Transcription factor p65	52486.4	46149.7	47468.2	48749.5	35969.4	43924.4	41113.6	49142.1	84447.1	85011.7	89444.2	89353.2	67298.7	53311.6	41791	41796.1	42027.8	54544.6	42163.3	42819.2
0	1.16597	42713.3	Q04447	Ckb	Creatine kinase B-type	610941	498759	442121	342234	386547	349526	336490	376007	1.79306e+06	2.05405e+06	1.91549e+06	1.79939e+06	934182	619406	556491	621217	569186	440289	366129	448762
0	1.07335	55913.96;51847.51;59506.11	Q04735;Q04899;Q8K0D0	Cdk16;Cdk18;Cdk17	Cyclin-dependent kinase 16;Cyclin-dependent kinase 18;Cyclin-dependent kinase 17	82682.1	92213.7	102459	16096.9	21679.6	26246.7	53376	17787.8	31964.4	23276.5	18962.8	12823.3	41554.3	25136.9	33072.6	30714.4	13794.3	19345.4	18372.9	10820.8
0	1.12881	90875.7	Q04750	Top1	DNA topoisomerase 1	215411	248458	432605	386326	76473	138827	391001	351977	224167	205740	400864	431631	162365	127573	321358	368662	179735	180491	376673	411563
0	1.13689	108489	Q04857	Col6a1	Collagen alpha-1(VI) chain	166798	94795.7	199433	104354	72046.9	83357.4	240038	236991	172853	232337	319428	246148	157519	126726	122878	123639	304400	87681.3	399901	217014
0	1.10626	10741.3	Q05020	Apoc2	Apolipoprotein C-II	960920	1.69951e+06	1.22356e+06	116044	129181	48995.1	74015.4	48681.3	92954.4	32597.9	102429	31972.7	81848.2	163847	95316.4	99118.4	55902.9	47592.3	36036.1	24213.8
0	1.12775	36807.1	Q05117	Acp5	Tartrate-resistant acid phosphatase type 5	299466	270852	286116	418059	302701	279356	338022	208205	405163	415087	349410	350691	200382	156514	276309	226451	373576	463418	485892	412815
0	1.06489	21440.8	Q05144	Rac2	Ras-related C3 botulinum toxin substrate 2	44999.7	50646.6	37130.9	39057.7	26308.1	40773.6	17450.6	63484.9	102200	117841	94528.4	119804	65247.6	14935.9	52805.7	29348.8	31513.8	25010.6	19207.2	30649.7
0	1.09267	38113.1	Q05186	Rcn1	Reticulocalbin-1	63250.9	41239.5	35059.4	28874.1	44326.6	10142.7	17480.7	18956	164053	161136	130513	165950	102143	67327.4	40671.8	36407.2	28261.2	46509.5	22046.4	37758.2
0	1.18758	56805.1	Q05421	Cyp2e1	Cytochrome P450 2E1	13369218	9044704	12221891	9203646	12696247	13244442	12417359	12989092	7542155	7462193	4883498	7966111	11133334	10551308	11616592	10921291	15378044	15258248	16610112	10476334
0	1.14963	398294	Q05793	Hspg2	Basement membrane-specific heparan sulfate proteoglycan core protein	445876	282964	522181	475251	393437	459531	571060	575742	909778	948248	1.20929e+06	1.2991e+06	672121	513569	719002	648271	673472	580855	687610	789090
0	1.21529	15137.4	Q05816	Fabp5	Fatty acid-binding protein 5	3.32466e+06	4260226	3.91934e+06	1.66111e+06	3.06638e+06	2.87733e+06	2053469	2.62901e+06	2.31769e+06	2548426	2429123	1.87383e+06	2.3718e+06	1.60505e+06	2.51903e+06	1.47772e+06	1.16536e+06	2.49412e+06	983103	2935073
0	1.11712	27014.1	Q05915	Gch1	GTP cyclohydrolase 1	211943	225075	260555	259500	276931	232161	210268	254533	253150	272784	316033	212339	319599	300997	226430	271334	221534	202215	229095	215585
0	1.20204	129685	Q05920	Pc	Pyruvate carboxylase, mitochondrial	25806702	26196484	23691582	20793906	20471116	18907238	19239110	18406514	20889862	21068738	18722282	20299666	19935784	22544764	20633830	17607424	19497818	19816942	20211516	19482180
0	1.08517	64802.3	Q05CL8	Larp7	La-related protein 7	78619.9	63093.7	63931.1	43278.3	44185.7	49838.2	37019.8	56903.1	64394.9	53566.6	81338.7	90721	40547.1	35080.4	33260	27083.5	48472.1	50616.5	44919.8	55330.1
0	1.12894	137616	Q05D44	Eif5b	Eukaryotic translation initiation factor 5B	359426	342348	348604	326999	262416	318763	289612	305424	442354	388541	431962	426657	350280	347944	333293	346033	366961	352289	348030	364111
0	1.13588	39842.9	Q06138	Cab39	Calcium-binding protein 39	133576	130917	134373	147477	150893	151909	135903	139700	125533	162898	159846	126099	119118	118323	119074	143116	90742.2	91080.1	127451	109119
0	1.18565	8235.6	Q06185	Atp5me	ATP synthase subunit e, mitochondrial	5995204	6.54393e+06	6.6907e+06	6.08579e+06	5.84045e+06	5.75222e+06	5.86802e+06	5961291	5.12444e+06	6.02392e+06	4771179	5282363	6006520	5.78838e+06	6.13158e+06	5593786	6231018	5639846	6395911	6.19153e+06
0	1.0454	44769.2	Q06770	Serpina6	Corticosteroid-binding globulin	359828	133570	279141	470325	341011	344657	380925	98896.8	89963.1	120245	114418	152690	134942	64518.5	106996	85476.1	211523	56452.7	219967	92498.9
0	1.15431	51655.6	Q06890	Clu	Clusterin	618715	833531	557584	495519	359500	311794	312648	324849	978381	1.28169e+06	1360250	1.06433e+06	459256	303912	352040	383733	285873	280939	326961	302456
0	1.16246	49925.3	Q07076	Anxa7	Annexin A7	1.71219e+06	1.32081e+06	1.65157e+06	1.64283e+06	1.41559e+06	1460522	1.45471e+06	1.48812e+06	2.36642e+06	2.52293e+06	3.1164e+06	3.13724e+06	1.89526e+06	1.83801e+06	1.60073e+06	1.59781e+06	1.64603e+06	1.75007e+06	1.66001e+06	1.73668e+06
0	1.0675	273815	Q07113	Igf2r	Cation-independent mannose-6-phosphate receptor	54263.3	43134.1	48237.9	37972.2	59861.6	76786.1	60210	66766.1	84513.1	85423.7	99230.7	80138.3	32858.1	27300.1	52314.1	55814.1	47398	40724.3	50311.4	42563.7
0	1.18048	44889.6	Q07417	Acads	Short-chain specific acyl-CoA dehydrogenase, mitochondrial	7888902	8508775	7660004	6710812	6.50221e+06	7257375	6.65758e+06	6461341	6.30635e+06	6408986	5348651	6.48317e+06	6748690	7100025	6.93377e+06	6632469	7531249	7496686	7897851	7.22809e+06
0	1.12575	39029.2	Q07456	Ambp	Protein AMBP	1.02517e+06	1.37429e+06	859574	911689	643262	591584	547852	582989	928392	1.06938e+06	1004917	1.13298e+06	660635	481712	582656	507170	604305	777486	698879	827859
0	1.14883	64491.1	Q07797	Lgals3bp	Galectin-3-binding protein	562391	487699	480313	372491	337386	363766	346141	380363	638280	881279	756908	656981	328129	339258	369174	406301	305890	333914	243734	322729
0	1.14131	21394.6	Q07813	Bax	Apoptosis regulator BAX	332286	304831	361369	265008	260159	284257	259482	260618	613705	692743	719262	620336	481501	344549	365797	387116	316803	311455	307907	371421
0	1.07136	22030.5	Q08024	Cbfb	Core-binding factor subunit beta	73082.2	50776.7	59434	65172.1	61293	76390.6	75337.2	52871.4	127474	149700	159385	158321	91208.3	50816.1	60272.2	71476	81827	97650.3	76894.2	87627.8
0	1.07408	33355.6	Q08091	Cnn1	Calponin-1	1.28038e+06	146470	144195	98400.2	131672	76975.5	121095	92664.7	374189	524901	83435.3	69527.1	943896	140265	77300.7	60048.1	542400	129840	306307	192480
0	1.10598	33155.5	Q08093	Cnn2	Calponin-2	52118.8	42932.1	38788.6	37492.7	55702.7	42353.9	26389.4	62718.2	131140	129982	152794	130779	75174.9	63350.6	20595.1	19827.1	29184.9	23903.4	20521.4	49192.9
0	0.97324	43735.6	Q08288	Lyar	Cell growth-regulating nucleolar protein	11018.5	13831.6	10257	5472.69	5412.14	11787.5	19738.3	7464.82	4882	18035.1	3560.26	4487.79	4253.1	22379.2	8067.92	4017.23	4724.96	3112.11	6739.3	2921.92
0	1.05178	81262.6	Q08481	Pecam1	Platelet endothelial cell adhesion molecule	34563.1	30807	24845.7	17655.2	29702.8	18105.4	11492.3	19486.7	18731.6	20330.5	24895.7	23031.3	9765.22	12049.4	11659.3	12551.1	13280.2	10530.9	14450.6	15210.2
0	1.16639	52698	Q08857	Cd36	Platelet glycoprotein 4	356855	353568	332415	403572	302607	420225	266433	241611	771084	898731	889779	895404	651941	893474	625776	835410	436824	340336	379288	383873
0	1.13318	78032.8	Q08879	Fbln1	Fibulin-1	132189	119839	894000	98118.8	125931	86789.8	73898.2	92909.3	238957	227706	283444	231492	147317	111798	169617	104820	60172.5	57422.1	66074.2	64969.3
0	0.999265	80860.4	Q08943	Ssrp1	FACT complex subunit SSRP1	28733.5	29537.2	55622.9	115073	32262	41579.2	118238	75659.1	71729	20324.2	79162.4	71175.2	25721.9	28453.7	38030.2	58000.5	25280.9	26275.4	51435.4	11883.2
0	1.10439	44666.9	Q09014	Ncf1	Neutrophil cytosol factor 1	84873.3	110563	88312.3	53537.5	35441.2	50257.7	46726.2	56320.1	153762	167826	141314	177897	57965.5	37895.5	43836.3	33242.8	17167.8	37010.3	6083.17	11674.5
0	1.01566	11058.1	Q09098	Pate4	Prostate and testis expressed protein 4	21219.3	21598.4	28333.7	138760	24935.8	19135.2	24399.7	14561.5	18717.3	8718.79	13244.4	7143.56	3308.6	6767.96	11987.3	9269.12	7529.22	9610.81	8271.94	3318.79
0	1.07823	59211.9	Q09200	B4galnt1	Beta-1,4 N-acetylgalactosaminyltransferase 1	284265	35962.9	108936	42564.3	64744.3	99622.1	26483.6	19871.9	75103.3	72547.2	98924	92900.8	18335.9	33972.2	16780.3	13285.8	13537.8	29606.4	24654.3	45415.8
0	0.995788	138560	Q0GNC1	Inf2	Inverted formin-2	28504.2	15796.2	17364.3	26674.8	18206.2	25257.5	25968	28396.6	23662	25138.1	8325.45	7978.77	25380.6	24113.4	32218.9	27702.5	19600.4	28092	33190.9	28177.9
0	1.10304	105694	Q0P678	Zc3h18	Zinc finger CCCH domain-containing protein 18	52663.5	43227.3	49101.9	57294.9	40053.4	45434	52109.6	48938.4	58561.2	57519.1	61793.5	64811.5	49359.7	35926.3	45281.8	49881.2	51651.1	51871.1	49391.2	56836.7
0	1.11556	105722	Q0VBL3	Rbm15	RNA-binding protein 15	60283.1	62059	64596.2	54236.7	37124.6	45264.3	55889.4	53274	62558.7	59112.6	63705.8	71602	48692.8	39736.8	39492.4	52219.2	52267.7	50121.5	48913.2	57720.4
0	1.11481	46478.7	Q0VGB7	Ppp4r2	Serine/threonine-protein phosphatase 4 regulatory subunit 2	160607	170971	160688	136261	132819	164939	165613	179179	141640	139904	134468	126023	85355.8	84359.2	75148.3	101816	76837.5	82894.1	85152.3	100102
0	1.15372	103325	Q11011	Npepps	Puromycin-sensitive aminopeptidase	241361	245736	263509	305302	329003	307913	331345	307371	428089	385027	435779	454594	386585	328401	345251	354879	322535	315464	291914	286844
0	1.14524	55028.8	Q11136	Pepd	Xaa-Pro dipeptidase	615767	515239	535945	509189	478277	469612	481743	464005	1.04213e+06	986437	1.40021e+06	1.04292e+06	753206	669377	678664	737964	485729	542378	464487	492893
0	1.1189	131115	Q148V8	Fam83h	Protein FAM83H	35094	22565	37767.9	32439.5	9348.5	16643.2	18948.9	30488.3	26869.7	33608.8	53107.4	54749.9	9098.32	17472.3	30899.9	34684.7	13152.2	9701.43	13746.5	14877.4
0	1.13863	77796.2	Q14C51	Ptcd3	Pentatricopeptide repeat domain-containing protein 3, mitochondrial	404170	517939	513584	393792	402450	385316	410721	382635	519817	517155	517713	511113	478893	490554	529691	442218	462228	494341	488519	506393
0	1.14288	95012.6	Q14CH1	Mocos	Molybdenum cofactor sulfurase	349977	332024	321133	423936	346590	388770	362595	377814	411797	442705	485792	419558	473295	461855	439853	448904	380948	434295	363595	338714
0	1.05909	106783	Q14CH7	Aars2	Alanine--tRNA ligase, mitochondrial	24311.6	24703.4	32291.6	27079.8	16382.6	25332.9	22614.3	6431.07	32779.7	40981.8	31605.5	31722.4	17452.7	30919.3	43315	11093.1	26554.2	25196.8	21526.3	24912
0	1.11155	74518	Q14DH7	Acss3	Acyl-CoA synthetase short-chain family member 3, mitochondrial	327487	362389	361507	516651	285602	242177	253365	174470	240671	185708	193756	313739	473034	690647	631132	680776	363464	374151	327052	222043
0	1.10178	85451.6	Q1HFZ0	Nsun2	RNA cytosine C(5)-methyltransferase NSUN2	327351	302734	326046	250952	248799	290294	299871	284325	297160	295261	348545	309458	277195	225945	213437	234656	285376	276283	236308	298459
0	1.16645	20016.7	Q283N4	Urad	2-oxo-4-hydroxy-4-carboxy-5-ureidoimidazoline decarboxylase	1.00537e+06	1.04554e+06	1.15129e+06	1.43007e+06	1.56835e+06	1.45428e+06	1502799	1.59095e+06	1.79353e+06	2.10472e+06	1.58899e+06	1.6461e+06	1.30299e+06	1.19221e+06	1072388	1.14777e+06	1.28589e+06	1.51498e+06	1.27821e+06	1.88992e+06
0	1.00013	203802	Q2EMV9	Parp14	Protein mono-ADP-ribosyltransferase PARP14	49903.5	44314.1	46936	47566.3	30753.5	37106	33026.6	52283.7	52322.5	28135.6	36144	41046.5	28571.3	35123.3	19310.7	40098.1	30323.3	38860.5	27031.4	33272.4
0	0.964788	51660.5	Q2NL51	Gsk3a	Glycogen synthase kinase-3 alpha	154041	121839	83955.3	63369.9	87994.7	59532.7	90411.9	45423.5	152228	160020	126330	149656	90686.8	114568	198030	112900	74151	108729	120470	99825.9
0	1.05982	54257.7	Q2TBE6	Pi4k2a	Phosphatidylinositol 4-kinase type 2-alpha	50699.3	52060	40797.6	50315	44701.7	45863.5	43973.6	36155.5	84723.2	108519	110074	92907.8	69778.8	66196.9	70696.3	57709.2	50529.5	55335.3	51589.6	48633.3
0	1.15251	54208.4	Q2TPA8	Hsdl2	Hydroxysteroid dehydrogenase-like protein 2	2555394	2.61003e+06	2782385	2132346	1.52851e+06	1711669	1.68774e+06	1.75801e+06	1.27633e+06	1.20942e+06	1.16438e+06	1.32859e+06	1.44233e+06	1.89021e+06	1.93037e+06	1.776e+06	1.32601e+06	1.19886e+06	1455692	1.37651e+06
0	1.11938	120921	Q2VLH6	Cd163	Scavenger receptor cysteine-rich type 1 protein M130	76906.6	82279.2	70297.3	48007.9	53053.3	58688.6	49388.8	66811	53093	86954.4	51931.1	52149.7	40170	38117.9	50031.5	48892.6	55539.3	52164.5	47875.7	47195.3
0	1.11323	50656.6	Q31125	Slc39a7	Zinc transporter SLC39A7	130870	125357	117614	131418	77606	135141	169910	158085	104027	123236	106473	149533	132408	101589	172154	124992	119375	153653	121662	155234
0	1.14296	88796.6	Q3B7Z2	Osbp	Oxysterol-binding protein 1	352088	350585	344694	336137	337738	340810	316832	356398	491194	440859	504894	487073	417221	377522	306999	353504	320126	348844	316269	343750
0	1.11879	31231.7	Q3KNM2	Marchf5	E3 ubiquitin-protein ligase MARCHF5	242912	248403	271616	199008	213967	226365	231634	195899	273688	244046	242440	236094	222604	195726	238923	199014	242728	243054	244566	239767
0	1.00184	47120.73;47120.73	Q3T9E4;Q62293	Tgtp2;Tgtp1	T-cell-specific guanine nucleotide triphosphate-binding protein 2;T-cell-specific guanine nucleotide triphosphate-binding protein 1	82156.2	50839.7	66690	23672.2	15099.7	13591.3	53247	38303.5	74069.7	80733.2	61923.2	71317.3	42569	31848.5	37977.1	45708.4	18289.4	7111.99	16661.8	44865.5
0	1.11703	58621.5	Q3T9X0	Slc2a9	Solute carrier family 2, facilitated glucose transporter member 9	112174	103549	101388	121426	119047	118246	120081	100007	100035	94712.4	66040.4	97432.7	111105	110497	133691	122738	129162	128861	127446	120890
0	1.12479	27052.5	Q3TAS6	Emc10	ER membrane protein complex subunit 10	112000	103930	110274	122839	102060	118009	97556	99912.4	102869	87607.8	96830.7	104258	92993.6	87361.7	81690.5	88074.3	88090.4	88415.6	83866	84420.7
0	1.1185	29395.6	Q3TBW2	Mrpl10	39S ribosomal protein L10, mitochondrial	271916	279078	267728	263072	204733	337718	280266	342070	203062	230701	168439	148273	207532	166414	216264	255490	226473	193531	179136	217253
0	1.16684	34690.4	Q3TC72	Fahd2	Fumarylacetoacetate hydrolase domain-containing protein 2A	646990	701150	715976	666711	587706	629918	662414	618181	468592	485098	378975	519423	487666	480922	507648	480912	724768	666547	719679	732998
0	1.08895	43691.3	Q3TC93	Hs1bp3	HCLS1-binding protein 3	46539.8	61984.9	55305	40304.8	42071.6	41720.6	55056.4	44502.8	82711.5	109474	85005.5	96689.2	58252.8	43112.3	33867.5	41973.7	51778.2	61062.1	44573.4	56789.4
0	1.14218	87753.4	Q3TCH7	Cul4a	Cullin-4A	281400	239684	286940	322431	301171	349268	327861	327014	255368	250259	273861	274512	296027	303705	263283	340458	301186	309039	301671	297454
0	1.15934	46942.8	Q3TCJ1	Abraxas2	BRISC complex subunit Abraxas 2	175136	164237	156118	170329	186220	189937	181455	218622	266270	271321	276334	247289	234236	232115	186015	209655	204359	205271	184279	179863
0	1.10694	66289.5	Q3TCN2	Plbd2	Putative phospholipase B-like 2	155696	134635	166866	122671	136930	108612	103641	85346.1	146874	164471	153532	154436	121846	94655	117539	89162.1	177422	171930	164719	118817
0	1.09662	88337.5	Q3TDD9	Ppp1r21	Protein phosphatase 1 regulatory subunit 21	61239.2	59158.6	51599.8	52897.3	47440	37947.2	62243.9	59249.7	49946.8	53802.7	52473.2	59180.3	42285.7	39612.4	62119	61499.1	53999.4	57351.3	37860.2	39407.6
0	1.16167	52471.3	Q3TDN2	Faf2	FAS-associated factor 2	379914	403974	406656	378442	379091	349112	422830	488807	420885	400831	467154	490856	412411	406424	397105	350541	372590	359927	369069	389318
0	1.15973	93245.7	Q3TDQ1	Stt3b	Dolichyl-diphosphooligosaccharide--protein glycosyltransferase subunit STT3B	948482	939200	828095	909062	883857	843157	892433	829619	1.05176e+06	1.07769e+06	1.19547e+06	1.17929e+06	865655	880008	943327	828685	816073	801325	776311	886112
0	1.14864	60866.6	Q3TEA8	Hp1bp3	Heterochromatin protein 1-binding protein 3	1.24249e+06	1.11228e+06	1.47042e+06	979893	998080	902084	975508	1.23179e+06	1.35318e+06	1353684	1.48101e+06	1.79013e+06	884459	940654	903445	1.01393e+06	951401	942193	1.00071e+06	1164180
0	1.06222	21680.8	Q3TFQ1	Spryd7	SPRY domain-containing protein 7	156676	165710	115076	167096	138254	147060	124210	160962	94650	77843.8	81978.2	99743.9	29356.8	77817	27254.5	71343.2	94236.6	106999	72712.7	96167.2
0	1.05554	15571.7	Q3TGF2	Fam107b	Protein FAM107B	130502	189286	141584	170704	214956	208654	187962	208162	122959	111166	76965.9	84675.4	109501	150650	66176.1	99498.1	88389.2	108549	99042.7	76597
0	1.0456	59007.8	Q3TH73	Ttyh2	Protein tweety homolog 2	24416.6	16889.1	37177.5	33102.2	40593	33712.6	24403	20840.4	19115.5	12518.4	50846	58185.9	25620.4	36095.3	36517.6	50288.6	34175.7	34930.2	39409.4	52968.2
0	1.16684	19779.2	Q3THE2	Myl12b	Myosin regulatory light chain 12B	1672358	1.00753e+06	1.69719e+06	1.91788e+06	1426493	1.04939e+06	1.83719e+06	1.4984e+06	1.31448e+06	1.49128e+06	4.17769e+06	4.5471e+06	1.33357e+06	1.31452e+06	2.13435e+06	2.57672e+06	1.07249e+06	1.18256e+06	1.94832e+06	1732878
0	1.10001	44970.9	Q3THG9	Aarsd1	Alanyl-tRNA editing protein Aarsd1	340362	302388	334459	349608	357402	346323	384670	326407	325798	324547	312368	309408	337693	329226	346858	329281	339610	405843	346911	325434
0	1.16423	76723.4	Q3THK7	Gmps	GMP synthase [glutamine-hydrolyzing]	567470	584083	518012	410704	466291	442911	426978	416406	596151	524399	607119	586090	441272	409939	404419	415988	467614	466894	461121	474229
0	1.17288	43688.7	Q3THS6	Mat2a	S-adenosylmethionine synthase isoform type-2	22002196	22772004	20758750	17652618	14848817	14588888	14192006	12560873	19095644	19559238	18761404	18547230	15216776	16981446	14718101	15637221	13039458	13282810	11597682	13258231
0	1.00893	67513.7	Q3TIU4	Pde12	2',5'-phosphodiesterase 12	23554.4	10786.4	296827	8584.58	195205	114910	161012	140203	194833	263300	238534	189102	171664	192239	188023	85488.9	163495	146872	116344	134696
0	1.11613	48327.2	Q3TIV5	Zc3h15	Zinc finger CCCH domain-containing protein 15	308361	331055	236542	237549	296023	336697	280310	278741	259448	231700	285123	230076	236702	216350	234150	279824	265366	270033	247207	270761
0	1.10578	65146.3	Q3TIX9	Usp39	U4/U6.U5 tri-snRNP-associated protein 2	98021.2	116975	98469.3	91824.2	93602.9	105353	90924.5	113654	115120	101897	148087	135186	83828.2	75440.8	75053.6	96168.8	89827.2	84688.3	88048.8	91755.7
0	0.991193	114323	Q3TJ91	Llgl2	LLGL scribble cell polarity complex component 2	31038.1	38712.8	33137.5	57002.3	68971.4	70183.9	64148.4	72551.5	25786	26811.6	26251.6	14369.2	51387.1	43242.6	22862.6	44030.3	50328.6	54064	51234.3	31822
0	1.10697	55055.4	Q3TJZ6	Fam98a	Protein FAM98A	104840	117803	115335	128406	141426	146509	157661	133979	122301	95913.8	141576	126185	136289	143644	148583	177035	143917	158006	145343	133412
0	1.11423	107831	Q3TL44	Nlrx1	NLR family member X1	136905	159103	155854	131035	161943	140465	144408	113666	181648	195954	230684	223883	164506	180023	188054	160426	192300	184182	155266	183191
0	1.06139	310892	Q3TLH4	Prrc2c	Protein PRRC2C	39294.4	74372.2	45342.9	46349.9	18225.4	29879.1	26895.3	14607.7	73721.4	41894.4	49614.6	68501	62706	41554.9	10362.2	4185.65	32798.4	28084.9	28255	53235.3
0	1.17219	31852	Q3TLP5	Echdc2	Enoyl-CoA hydratase domain-containing protein 2, mitochondrial	10555075	10872990	10487644	7755294	7.72855e+06	8592862	9388087	9271733	10785911	11904786	9720640	10052248	9824670	9500444	9404634	7.86449e+06	8541544	8978908	8220696	11089563
0	1.14508	47661.2	Q3TMH2	Scrn3	Secernin-3	292590	270345	281022	300911	318374	315680	307537	293808	274997	263378	258078	212396	316287	309061	270532	317187	358372	372239	379165	346038
0	1.1646	59543.8	Q3TNA1	Xylb	Xylulose kinase	1.12113e+06	987038	1.16311e+06	1.30039e+06	1.29043e+06	1.26303e+06	1.31186e+06	1.09095e+06	1.65195e+06	1691191	1.65154e+06	1.6494e+06	1.61316e+06	1.54738e+06	1.40102e+06	1.47191e+06	1581579	1.78937e+06	1.49703e+06	1733622
0	1.13244	100101	Q3TRM8	Hk3	Hexokinase-3	239499	238606	181419	77237.4	115792	119834	111665	138739	641096	921393	891662	766918	252144	160908	164969	172851	211081	216145	121830	229115
0	1.13397	70922.7	Q3TTY5	Krt2	Keratin, type II cytoskeletal 2 epidermal	221418	443999	128801	265606	151965	218242	236093	142014	192519	270961	191816	109667	82351.7	243905	191829	219684	200031	179873	144566	373158
0	1.15206	56613.8	Q3TW96	Uap1l1	UDP-N-acetylhexosamine pyrophosphorylase-like protein 1	367905	330351	320135	204514	224906	338326	251895	228053	2.16293e+06	2.25514e+06	2.88327e+06	1.98212e+06	1.12372e+06	899754	876668	842794	430694	418227	337147	474938
0	1.02825	30047.1	Q3TWL2	Pip4p1	Type 1 phosphatidylinositol 4,5-bisphosphate 4-phosphatase	58588.4	53862.1	51662.4	47221.5	64943.6	68308.3	47152.8	49278.6	86376.5	94121.8	81417	77557	60576.7	75491.7	40672.4	47646.4	45373	60070.5	77636.7	80116.6
0	1.13107	39025.3	Q3TWW8	Srsf6	Serine/arginine-rich splicing factor 6	418267	409057	408446	301882	295991	257041	258105	326290	443327	302904	505209	551249	280005	265599	241294	246370	264941	272488	274147	309160
0	1.17604	105730	Q3TXS7	Psmd1	26S proteasome non-ATPase regulatory subunit 1	1.48545e+06	1.48033e+06	1.39741e+06	1.54714e+06	1.42406e+06	1.56861e+06	1.55738e+06	1.55529e+06	1565925	1.52499e+06	1.58107e+06	1.49355e+06	1.53484e+06	1.56412e+06	1.49766e+06	1.4879e+06	1367416	1.39363e+06	1.28441e+06	1.26742e+06
0	0.98457	46202	Q3TXX3	Zfyve27	Protrudin	10479	1522.34	3206.34	1150.07	5891.23	2011.47	2172.48	8371.37	6488.18	8162.03	9104.82	5431.45	5035.86	6574.23	6879.59	5327.81	8290.27	9805.13	7514.59	5461.5
0	1.10273	20921	Q3TYS2	Cybc1	Cytochrome b-245 chaperone 1	39787	42249.5	41671.5	36300.9	43607.3	39684.5	37387.1	32448.9	77046.9	78684	97116.4	92142.7	70343.2	67334.5	65242.7	57441	44080.2	45058.6	40991.6	47176.6
0	1.1488	47095.3	Q3TYX3	Smyd5	Histone-lysine N-trimethyltransferase SMYD5	93827.3	86075.3	77309.2	88945.5	100331	100675	92842.6	93564.1	181385	168399	196090	173584	144890	136424	110094	84589.6	98734.9	95819.7	79822.7	82860
0	1.09813	55270.1	Q3TZM9	Alg11	GDP-Man:Man(3)GlcNAc(2)-PP-Dol alpha-1,2-mannosyltransferase	195834	185139	89372.1	97666.4	162972	145647	145193	67506.2	192283	53659.6	172199	184605	159006	137118	93956.4	31748.8	132226	120364	107321	110860
0	1.12277	94139.3	Q3TZZ7	Esyt2	Extended synaptotagmin-2	58422.3	54058.6	58117.3	50039.2	45408.3	52308.7	47422.8	45482.3	92208.5	48017	106279	96966.9	62871.8	64076.1	57775.7	56847.9	50639.1	52097.5	55422.5	59034.3
0	1.14168	28274.2	Q3U0B3	Dhrs11	Dehydrogenase/reductase SDR family member 11	621704	495480	619244	636746	603658	564870	574885	465840	686659	750479	581263	706106	659172	593862	602624	625051	640617	676251	657331	639400
0	1.17076	76775.5	Q3U0V1	Khsrp	Far upstream element-binding protein 2	970377	982042	893074	794452	803109	781589	833802	920461	1.03311e+06	1.00471e+06	1.03526e+06	1.21184e+06	808825	674965	697034	745333	814318	824438	769673	926985
0	1.09972	34577.3	Q3U0V2	Tradd	Tumor necrosis factor receptor type 1-associated DEATH domain protein	143307	157525	117184	97095.8	104059	73123.8	113272	98476.9	151248	169430	119299	154803	120765	110256	88018.4	115901	52090.6	69673.8	54143.5	102108
0	1.09089	65335.9	Q3U186	Rars2	Probable arginine--tRNA ligase, mitochondrial	81033.3	86577.5	78598.6	69003.3	69849.1	67661	46751.4	66807	98472.7	119943	107423	88809	83439.8	87806.9	87685.3	83132.7	81346.1	89598.9	84816.8	87274.5
0	1.16196	126853	Q3U1J4	Ddb1	DNA damage-binding protein 1	955409	898083	884559	832754	834634	873411	878676	882101	1.19023e+06	1.20737e+06	1.24267e+06	1.24837e+06	962472	959958	905630	918492	919466	988424	900193	918409
0	1.06728	13141.8	Q3U276	Sdhaf1	Succinate dehydrogenase assembly factor 1, mitochondrial	116830	129121	111096	81085	98123.3	109238	119121	81013	136076	137172	111775	114480	138973	115655	124947	130439	147357	130343	133190	133225
0	1.08726	42552.7	Q3U2C5	Rnf149	E3 ubiquitin-protein ligase RNF149	96454.8	96176.3	86064.6	40322.9	49719.8	48201.1	43859.7	25373	54885.7	66371.2	68455.3	60714.8	56393.2	49684.4	46573.2	46408.7	50230	61105.6	50160.7	70353.6
0	1.15836	118782	Q3U2P1	Sec24a	Protein transport protein Sec24A	1.17126e+06	1.25769e+06	1.17287e+06	1.10503e+06	985936	1.04019e+06	1.06182e+06	822642	774745	792062	1.00386e+06	838859	829433	972022	960158	1.04133e+06	907421	998967	988270	874902
0	1.09727	56105.1	Q3U308	Ctu2	Cytoplasmic tRNA 2-thiolation protein 2	47544.9	44420	41234.1	43187.9	43980.8	49198.5	46795.2	52647.7	83128.6	75471	71861.5	78418.3	65680.8	62778.4	52548.4	52193.2	48373.8	57982	44463.5	49155.7
0	1.15359	65877.9	Q3U3R4	Lmf1	Lipase maturation factor 1	407946	290920	308273	377773	396233	346018	403366	355653	273159	265467	259532	275069	249990	271973	257628	312855	295874	303384	306288	293305
0	1.10915	97347.1	Q3U487	Hectd3	E3 ubiquitin-protein ligase HECTD3	69236	64593.3	71495.2	111259	116605	105380	91824	74605.7	137685	112630	160331	158250	145229	136390	101903	111222	146684	145976	123140	116278
0	1.10158	50036.3	Q3U5Q7	Cmpk2	UMP-CMP kinase 2, mitochondrial	240842	287489	272715	186583	235334	205582	185072	228941	348383	398504	365242	324864	187899	160749	184505	223685	157782	138025	122127	229146
0	1.13392	121554	Q3U7R1	Esyt1	Extended synaptotagmin-1	231803	165447	153177	180414	171252	173407	147439	180845	489106	341013	507293	532803	210406	205578	203213	190437	186024	175788	168994	182801
0	1.01613	57649.1	Q3U7U3	Fbxo7	F-box only protein 7	14484.1	10675.4	10433	16107.1	14575.4	3545.76	13386.9	18192.2	15650.1	20657.1	32145.8	24128.6	26527	18994	17539.2	6441.88	22473.4	28359.5	10717.3	13823.5
0	1.1302	71440.1	Q3U9G9	Lbr	Delta(14)-sterol reductase LBR	93911.7	107812	123365	102370	90183.5	77293.8	101177	78715.1	205594	130017	187681	272230	94572.7	71787	66230.7	92853.6	94343.5	90439.3	102402	136112
0	1.05522	55320.2	Q3U9N9	Slc16a10	Monocarboxylate transporter 10	181441	182145	214115	125184	156914	208924	93750.5	76853.5	34057.3	6006.02	46264.5	58652.4	67433.5	56559.2	11803.4	116704	112128	96812.8	112627	118445
0	1.14471	26306.1	Q3UBX0	Tmem109	Transmembrane protein 109	409155	387164	382357	446437	376592	390169	360572	309511	572245	554922	836496	774828	460702	368212	397171	581295	480169	355479	439078	370776
0	1.07291	25493.3	Q3UBZ5	Mif4gd	MIF4G domain-containing protein	25411.6	13380.6	19681	18176.4	16759.2	16581.9	12218.7	12118.2	10445.7	14901.3	11669	6793.39	12408.2	17492.5	16921.3	17737.4	8304.14	10110.5	20753.8	12289
0	1.10091	40320.1	Q3UCV8	Otulin	Ubiquitin thioesterase otulin	51144.5	37265.1	44553.5	41266.5	41126.1	44788.4	46911.4	46571.2	24221.2	31288.8	35506.4	33919	39573	41195.7	33811.9	34049	32230.2	37080.4	28905.5	29290.5
0	1.11419	74043.3	Q3UDE2	Ttll12	Tubulin--tyrosine ligase-like protein 12	84144.4	67786.3	62086.1	69453.2	90217.6	80461.6	83359.1	55552.6	140008	138560	140609	101097	130023	120551	120707	125469	79583.1	77802.8	84076.3	81780.5
0	1.07757	37998.3	Q3UDR8	Yipf3	Protein YIPF3	99836.1	11043.4	102664	84851.7	112766	53398.8	74593.4	16781.4	147360	89758.6	144691	98497.4	124016	65389.8	86954.5	88697.7	99893.4	132694	92926.4	104448
0	1.07579	72504.2	Q3UDW8	Hgsnat	Heparan-alpha-glucosaminide N-acetyltransferase	199497	227299	80789.5	139724	127742	178436	37023.1	56855.8	242465	271067	253892	180751	74164.9	26471	34521.7	106724	93581.5	109875	21254.3	96749.6
0	1.09837	38368.3	Q3UE37	Ube2z	Ubiquitin-conjugating enzyme E2 Z	206312	207174	204314	253613	299332	263062	236991	239084	236396	237010	259713	242619	189401	204780	196082	210552	190385	188079	192908	170992
0	1.08766	60248.9	Q3UEB3	Puf60	Poly(U)-binding-splicing factor PUF60	247904	296738	263870	245718	172042	225222	243711	221148	279544	242029	274688	306563	179002	150374	172089	173422	183076	144799	166805	170079
0	1.2048	57115	Q3UEG6	Agxt2	Alanine--glyoxylate aminotransferase 2, mitochondrial	5.3488e+06	6378338	5.90455e+06	5.0212e+06	5.54356e+06	6158777	6607722	5846114	7.20974e+06	8231930	6.89708e+06	6767536	6.40051e+06	7511337	6354680	6.75463e+06	6241072	6265403	7.08993e+06	7173549
0	1.15512	26354.2	Q3UFF7	Lyplal1	Lysophospholipase-like protein 1	634017	701414	703681	665080	613454	606221	737280	608322	667449	884941	827841	657788	862935	901364	841023	981479	728370	649752	608053	660599
0	1.14477	29343.64;29485.8	Q3UGC7;Q66JS6	Eif3j1;Eif3j2	Eukaryotic translation initiation factor 3 subunit J-A;Eukaryotic translation initiation factor 3 subunit J-B	1.00983e+06	915401	864693	953254	948016	942216	874149	749356	1.0336e+06	1.05878e+06	1.06334e+06	813136	793761	767777	728298	877794	740353	649156	738630	700747
0	1.1264	28730.2	Q3UGR5	Hdhd2	Haloacid dehalogenase-like hydrolase domain-containing protein 2	387661	346832	388952	410385	412739	435361	414495	374616	392212	423574	399094	360760	474343	406778	414228	456300	431535	414971	389881	439863
0	1.10097	60988.8	Q3UHD6	Snx27	Sorting nexin-27	40048	56491.8	54669.4	54476	44041.2	48017.5	52740.9	58186.3	40494.5	54177.1	51279.1	54995.9	45801.7	46227.1	42687.7	36398.5	37924.5	44560.8	42555.4	41455.4
0	1.10912	103346	Q3UHJ0	Aak1	AP2-associated protein kinase 1	125642	174824	193632	164608	170104	151113	120929	189414	334017	322903	361319	399224	229252	223404	189701	198541	198454	212684	180260	261933
0	1.05155	100726	Q3UHN9	Ndst1	Bifunctional heparan sulfate N-deacetylase/N-sulfotransferase 1	8296.72	5639.52	9636.86	7475.96	8077.33	7418.23	7708.85	8399.04	9502.88	10809.1	10718.5	10791.2	8375.74	8114.48	7053.12	5864.56	7652.55	8955.68	8913.59	10585.1
0	1.08361	257483	Q3UHQ6	Dop1b	Protein dopey-2	368639	285240	327141	527932	490383	499789	567451	421203	406497	466174	552352	520810	411515	562780	702243	637896	333794	482272	478505	547777
0	1.138	20604.9	Q3UHX2	Pdap1	28 kDa heat- and acid-stable phosphoprotein	2.0273e+06	2.24197e+06	2.01416e+06	2116942	1.88351e+06	2.52135e+06	2424209	2842724	1.95534e+06	2.04963e+06	1.91008e+06	2.12094e+06	1852921	1.72345e+06	1401367	1.90936e+06	1.63121e+06	1755210	1.68216e+06	1.93631e+06
0	1.13135	92202.1	Q3UIA2	Arhgap17	Rho GTPase-activating protein 17	89974.5	97937	89397.4	80100.9	72538.7	77327.1	88896.5	58294.1	107037	116342	121370	91915.3	66792.6	69228.5	64373.8	83535.3	59137.2	57153.3	64294.5	80769.6
0	1.12664	83043.6	Q3UIR3	Dtx3l	E3 ubiquitin-protein ligase DTX3L	151611	111507	138923	160267	126109	134005	124636	127060	154599	124926	133843	139646	142594	157029	146120	135472	137822	141799	138706	135284
0	1.153	15515.1	Q3UIU2	Ndufb6	NADH dehydrogenase [ubiquinone] 1 beta subcomplex subunit 6	1.43288e+06	1.78427e+06	1.75324e+06	1437940	1.77357e+06	2.15356e+06	1.98834e+06	1616731	1.71709e+06	1.77423e+06	1.5481e+06	1.64733e+06	1.79002e+06	1.85199e+06	1.81925e+06	1.90189e+06	1.77196e+06	1681191	1.7405e+06	1.72559e+06
0	1.13325	152484	Q3UJB9	Edc4	Enhancer of mRNA-decapping protein 4	66327	74743.6	67512.4	60507.9	56195.9	68615.8	68155.3	65023.9	81000.9	71362.7	78943.3	81857.4	56177.9	43245.5	54922.9	59428.4	55804.9	61728.2	55139.7	62937.9
0	1.09459	150549	Q3UJD6	Usp19	Ubiquitin carboxyl-terminal hydrolase 19	126322	64512.8	70990.5	81230.8	93238	83700.6	76914.5	67787	112220	85689.5	95312	123508	116962	70413.3	94199	85519.9	133987	107601	99274.6	111360
0	1.15271	52028.8	Q3UJU9	Rmdn3	Regulator of microtubule dynamics protein 3	1.86018e+06	1.8964e+06	1.74456e+06	1.58511e+06	1.43507e+06	1.62674e+06	1.57731e+06	1.47314e+06	930539	988830	839243	926595	1.16091e+06	1.17982e+06	1.18827e+06	1139088	1.40596e+06	1.28991e+06	1.3065e+06	1112355
0	1.11443	57543.9	Q3UKJ7	Smu1	WD40 repeat-containing protein SMU1	234828	241884	204706	206336	168572	180152	158111	119468	218618	208657	301833	276694	176665	140199	153097	189004	171478	160996	186868	195521
0	1.17436	61379.1	Q3ULD5	Mccc2	Methylcrotonoyl-CoA carboxylase beta chain, mitochondrial	1.52502e+06	1.77095e+06	1.66955e+06	1.61904e+06	1.72061e+06	1.72279e+06	1.85812e+06	1.89408e+06	1.26613e+06	1.38051e+06	1.12558e+06	1.27061e+06	1.51508e+06	1.67241e+06	1611799	1.54197e+06	1.88753e+06	1.78537e+06	1.85387e+06	1.99674e+06
0	1.09943	85996.2	Q3ULF4	Spg7	Paraplegin	99715.9	107784	111162	90574.9	83311.4	90254.2	122053	92708.6	125900	122025	114313	118859	104929	92369.6	96901.9	99390	118349	92506.2	93391.4	105814
0	1.16095	38225.5	Q3ULJ0	Gpd1l	Glycerol-3-phosphate dehydrogenase 1-like protein	959829	766325	1.04021e+06	1.21497e+06	1.2044e+06	1.26884e+06	1.32277e+06	1.30447e+06	1.26287e+06	1.29176e+06	1.3196e+06	1.36971e+06	1.29023e+06	1.29895e+06	1.20428e+06	1.29243e+06	1.29522e+06	1.26914e+06	1.21228e+06	1282679
0	1.10014	59948.9	Q3ULW8	Parp3	Protein mono-ADP-ribosyltransferase PARP3	95468.7	84372.1	87038.5	56881.1	59203.5	68203	56977.1	47773	163663	194050	192587	167732	52771.7	81833.8	73624.8	76161.2	45568.4	61776.3	64842.3	66083.3
0	1.15683	41291.9	Q3UM45	Ppp1r7	Protein phosphatase 1 regulatory subunit 7	438881	428635	372200	427370	405527	453761	424929	457934	508897	545275	528708	518666	453517	465123	392259	504790	398546	352579	370174	391229
0	1.06648	136370	Q3UMB9	Washc4	WASH complex subunit 4	58368.4	44680.3	59128.7	51111.8	39153.6	43855.5	52787.3	21793.1	90140	102707	87730.7	92807.2	77288	60566.4	67605.9	68172.9	97749.4	88806.4	76104.1	88047.9
0	1.13921	137382	Q3UMF0	Cobll1	Cordon-bleu protein-like 1	555572	599501	583861	529749	526587	551962	526039	563638	422644	434054	356868	478866	447154	451390	436212	426414	570031	620217	591833	652522
0	1.10373	39681.6	Q3UMR5	Mcu	Calcium uniporter protein, mitochondrial	126860	127212	100476	100376	99253.9	122209	140211	90473.9	237725	216408	207162	209411	201251	179417	173746	143172	162709	155304	164028	155670
0	1.06749	84685.1	Q3UMT1	Ppp1r12c	Protein phosphatase 1 regulatory subunit 12C	74098.8	76132.4	64385.3	65864.5	53238.9	60872.3	62248.3	70741.6	64206.5	50435.9	54120.5	68212.1	51290.6	41662.6	29458.6	45190.2	49745.4	36550.8	36470.6	43813.6
0	1.14781	74290.7	Q3UMU9	Hdgfl2	Hepatoma-derived growth factor-related protein 2	555065	485105	492182	451920	397141	378532	439148	357144	667883	653803	571019	622434	511533	460989	388302	397928	499279	490473	476163	544827
0	1.11637	110027	Q3UMY5	Eml4	Echinoderm microtubule-associated protein-like 4	55477.8	64429.1	58337.7	46645.2	53758.5	54262	53428	53351.5	72654.9	73914.9	76443.6	70305.6	55156.3	45945.2	51160.6	50641	43345.1	44969.2	43737.8	48208.8
0	1.10064	44399.9	Q3UN02	Lclat1	Lysocardiolipin acyltransferase 1	582075	555493	628620	649281	631454	669262	720437	717911	780749	557295	769495	777915	673152	767624	692775	674396	604996	623220	636596	598614
0	1.09118	40712.1	Q3UND0	Skap2	Src kinase-associated phosphoprotein 2	70528.5	80129.6	71952.2	46810.3	29269.3	29843	21726.2	48351.5	106236	111260	91265	126141	65703.9	39776.4	51679.3	44494.7	33882.4	27957.9	22081.7	40333.1
0	1.15698	65623.1	Q3UNX5	Acsm3	Acyl-coenzyme A synthetase ACSM3, mitochondrial	1067144	1.0607e+06	1.11375e+06	938741	960062	958443	1.0166e+06	883730	761979	798040	605439	781126	750510	802909	833685	760831	1.17153e+06	1.09262e+06	1.18269e+06	1.09188e+06
0	1.11805	37808.8	Q3UNZ8	Cryzl2	Quinone oxidoreductase-like protein 2	249325	288675	270201	263263	256198	276218	258620	207339	246472	295514	251720	196681	236256	266868	291662	282648	282841	228939	249465	259448
0	1.15849	59698.4	Q3UP75	Ugt3a1	UDP-glucuronosyltransferase 3A1	723977	635370	701358	887107	821443	768107	802866	638134	242409	124597	290545	207645	538272	592332	522331	584604	874365	844592	971041	616009
0	1.09879	28647.9	Q3UP87	Elane	Neutrophil elastase	23925.8	86673.4	16242.1	20541.7	18491.8	18805	16069.8	30593.4	100270	87389.5	139957	193965	15627.4	11817	12076	7163.24	11384.9	7584.85	8240.48	4772.49
0	1.11049	106688	Q3UPF5	Zc3hav1	Zinc finger CCCH-type antiviral protein 1	183615	180554	181171	180581	223063	208588	163200	206229	210896	176910	237992	207976	212839	213007	114121	213879	192004	212711	180930	221007
0	1.15643	46297.6	Q3UPH1	Prrc1	Protein PRRC1	888364	778562	732688	714887	723456	710735	690956	590271	655723	643493	787998	741567	629698	621464	523001	592232	583123	607890	586970	527668
0	1.1642	133569	Q3UPL0	Sec31a	Protein transport protein Sec31A	1.2131e+06	1109388	1.25164e+06	1.38005e+06	1.32702e+06	1.42509e+06	1357808	1.25174e+06	1.34371e+06	1.39465e+06	1.55944e+06	1.46637e+06	1.30396e+06	1.33455e+06	1343876	1.37066e+06	1.24585e+06	1.36082e+06	1.26464e+06	1.29113e+06
0	1.07148	165103	Q3UQ28	Pxdn	Peroxidasin homolog	10337.3	16953.3	14513.4	12389.3	11364.9	12337	13429.3	20525	68863.9	57493.1	96609.6	80183.9	20322.6	19136.4	8573.56	8292.08	9555.09	15089.8	17153.5	6242.77
0	1.18267	180528	Q3UQ44	Iqgap2	Ras GTPase-activating-like protein IQGAP2	1533754	1.49161e+06	1.62706e+06	1.78396e+06	1.6274e+06	1714154	1.64782e+06	1.57996e+06	1.49631e+06	1.63098e+06	1539660	1.55416e+06	1.3101e+06	1388343	1.39286e+06	1.41007e+06	1480641	1601540	1.609e+06	1.71086e+06
0	1.08919	81700.3	Q3UQ84	Tars2	Threonine--tRNA ligase, mitochondrial	94960.9	86607.2	90318	89110	99947.6	101884	92597.9	87077.9	89518	90023.6	104236	86273.5	93673.6	102758	56261.5	101769	70802.1	58297.2	74195.2	70176.6
0	1.12396	88734.2	Q3UQN2	Fcho2	F-BAR domain only protein 2	126503	141989	106189	88341	105673	107457	71682.4	103779	155094	163354	163509	174388	114065	114065	85168.3	120324	114370	123731	104325	122402
0	1.09597	96933.4	Q3URD3	Slmap	Sarcolemmal membrane-associated protein	86004.8	82364.9	72889.6	71453.6	80874.1	77670.8	79049	78718.2	138417	132786	129217	149161	84499.6	74110.9	80868.1	75828.8	86533.4	74855.7	90419.8	94612.3
0	1.14575	65076.7	Q3URE1	Acsf3	Malonate--CoA ligase ACSF3, mitochondrial	375906	409899	369876	334498	324403	312031	267296	317735	348570	327607	351994	356111	472012	508558	396351	417991	494093	506244	446436	436776
0	1.13712	45132.5	Q3URS9	Ccdc51	Mitochondrial potassium channel	212875	244419	214617	196705	211099	244023	209542	169416	203528	153886	189063	181218	220070	236086	193033	232779	241580	210860	259303	229732
0	1.13464	132349	Q3UTJ2	Sorbs2	Sorbin and SH3 domain-containing protein 2	878217	915649	1.28253e+06	1.45234e+06	910604	1.22225e+06	1.71057e+06	1.56559e+06	1.7069e+06	1.80708e+06	2.62137e+06	2.69059e+06	1032904	725972	1.35219e+06	1.56535e+06	1.06422e+06	972335	1.49181e+06	1.67247e+06
0	1.11068	63235.7	Q3UUG6	Tbc1d24	TBC1 domain family member 24	163205	147824	166949	147114	157691	153088	122735	163384	197563	211118	225060	187324	204831	178472	139035	146905	134449	124468	108560	119308
0	1.12023	26031.3	Q3UUI3	Them4	Acyl-coenzyme A thioesterase THEM4	187126	201612	186005	156631	179128	183549	181286	165620	125714	118829	120109	120909	134145	127543	111473	120001	194411	178767	198604	214377
0	1.07354	93463.5	Q3UVG3	Fam91a1	Protein FAM91A1	69757.4	62141.9	52808.3	40898.8	44398.5	38540.2	41756.8	26945.9	106174	109328	94974.9	98874.6	75463	67781	65850.1	58709.5	80851.8	65896.3	63960.6	73239.9
0	1.12863	100148	Q3UVK0	Ermp1	Endoplasmic reticulum metallopeptidase 1	66343.1	68556.7	66118.2	57557.4	40503.3	57718.4	49290.8	41561.3	77027.2	70677.8	103842	85301.8	67683.8	59185.6	55043.5	58013.6	64732.8	76746.6	62318.9	59125.4
0	1.03573	86187.4	Q3UVL4	Vps51	Vacuolar protein sorting-associated protein 51 homolog	15257.7	14517.8	20875.2	16640.8	18883.3	20835.3	17986.1	21895.7	21280.5	23398.8	24023	22858.6	16763.6	14872.2	15591.4	15425.3	10587.9	12192.5	14407	14964.9
0	1.1091	102649	Q3UW53	Niban1	Protein Niban 1	52285.7	51705	42165	34409.7	48347.6	44070.5	35317.6	41483.2	115498	139376	109762	104943	41964	51341.1	38850.5	46955.3	41042.7	38400.1	30844	40112.2
0	1.00398	79656.84;79638.7	Q3UYH7;Q99MK8	Adrbk2;Grk2	Beta-adrenergic receptor kinase 2;Beta-adrenergic receptor kinase 1	9829.25	19774.4	8782.07	20571.7	40458.2	39753.4	26212.3	42824.3	92759.3	96163.4	109790	111507	48444.2	43008.6	38876.6	6500.79	39019.9	40767.1	25990.3	11901.9
0	1.12228	91926.7	Q3UYV9	Ncbp1	Nuclear cap-binding protein subunit 1	137293	147561	181038	139000	164456	177546	161152	163387	176029	206421	210365	170623	120609	69451.3	128058	119655	96371.9	87137.7	111552	107803
0	1.13786	79249.1	Q3UZ39	Lrrfip1	Leucine-rich repeat flightless-interacting protein 1	108205	94286.4	92901.9	100399	80904.7	91443.4	96425.4	84103.1	114366	118039	103911	107465	74227.2	64699.1	57800.9	80326.1	52531.2	58506.2	66337	81172.9
0	1.16635	35083.3	Q3UZZ6	Sult1d1	Sulfotransferase 1 family member D1	1.41763e+06	1316721	1.45825e+06	2.12387e+06	2214200	2.031e+06	2.14227e+06	2.06863e+06	3.70408e+06	4.71636e+06	3178617	3.20011e+06	2.238e+06	2.83962e+06	2165993	3.06985e+06	1.72798e+06	1.71883e+06	2.17502e+06	1.89629e+06
0	1.12366	25262.8	Q3V009	Tmed1	Transmembrane emp24 domain-containing protein 1	48657.6	47349.6	50898.6	58711	77792.2	53387.4	74273.3	42712.3	95074.6	101065	110062	103317	100445	87413.5	68355.3	77605.7	76190.7	89347.6	73869.5	71432.8
0	1.07058	70407.6	Q3V0K9	Pls1	Plastin-1	28711.6	12028.4	9754.65	21702.5	11531	21986.5	8587.21	12512.8	45656.6	61482.5	82455.6	51188.1	69817.9	64026.6	13666.3	35312.2	7033.44	12087.7	10142.8	12997.8
0	1.08409	64808.6	Q3V1L4	Nt5c2	Cytosolic purine 5'-nucleotidase	99396.1	119955	73822.1	43560	52167.1	45887.5	48700.6	26433.1	178735	158041	181522	133975	74442.6	95472.8	37584.4	63003.9	53435.2	65355.1	19111.5	26878
0	1.10475	54313.2	Q3V384	Afg1l	AFG1-like ATPase	318350	252438	336788	296946	304947	419571	309906	45474.3	68971.4	68367.3	43505.5	43529.4	43674	161362	33846.6	96258.2	150865	130996	131462	142642
0	1.12431	70759.4	Q3V3A7	Rnf207	RING finger protein 207	438452	455888	211000	400734	467948	419253	364091	368289	716346	832389	816558	685550	599121	616509	320469	512141	336340	407540	277764	391002
0	1.10081	105729	Q3V3R1	Mthfd1l	Monofunctional C1-tetrahydrofolate synthase, mitochondrial	51961.4	50562.2	38833.3	71055.1	51849.9	58817.7	66662.1	40712.3	245449	249055	286052	224099	106457	97339.9	91524.6	86668.8	29323.2	29609.6	23880.1	124355
0	1.15536	130810	Q3V3R4	Itga1	Integrin alpha-1	310704	346386	313481	256100	291855	296735	264197	231362	437723	469047	439884	453870	249408	244383	247094	247582	252295	261460	298100	304588
0	1.10134	10600.9	Q45VN2	Defa20	Alpha-defensin 20	465454	13470.7	284297	715737	23322.3	11502.6	65609.7	38053.7	167918	282574	206827	237275	53615.9	81538.6	62203	102718	182721	137567	179865	284867
0	1.15417	9030.41	Q4KML4	Abracl	Costars family protein ABRACL	428274	417302	387276	345568	359332	314160	297204	306150	581383	656001	620415	545462	361797	367169	362304	352042	246558	279908	189107	270790
0	1.09033	95911.8	Q4KMM3	Oxr1	Oxidation resistance protein 1	46142.7	29010.8	22890.8	18922.4	28547.7	41854.3	17494.7	32299.2	21078.9	24477.8	32046.8	15837.2	24144	15661.6	18416.2	21842	22007.6	8075.63	16288.9	9992.21
0	1.11047	187743	Q4KWH5	Plch1	1-phosphatidylinositol 4,5-bisphosphate phosphodiesterase eta-1	720090	635440	664347	718905	759593	685688	622601	859705	613878	584176	678674	611003	612711	446241	701055	596542	542818	646297	449800	414351
0	1.16949	76202.9	Q4LDG0	Slc27a5	Long-chain fatty acid transport protein 5	3.91773e+06	3.71732e+06	4.02969e+06	5.0888e+06	4454939	4.06903e+06	4563865	4.61025e+06	4242866	4352466	3.60845e+06	5.33755e+06	5204390	4964537	5.03079e+06	4.80432e+06	4.76612e+06	4.80975e+06	5073320	5789665
0	1.14064	49997.7	Q4PJX1	Odr4	Protein odr-4 homolog	196674	219989	197661	204649	192157	219221	206715	180680	241770	273783	287059	269120	246020	255538	267856	240528	202316	227456	229472	206621
0	1.10712	87072.6	Q4PZA2	Ece1	Endothelin-converting enzyme 1	106024	64086	57467.7	110981	117296	111276	90933.4	88287.1	135373	146852	151781	84334.5	89797	86151.7	70318.9	70110.1	79619	96583.8	90606.2	90783
0	1.04504	164419	Q4VA53	Pds5b	Sister chromatid cohesion protein PDS5 homolog B	17946.5	22311.6	20477.4	20635.9	18846.4	18045	19448.9	19475.8	22918.4	20634.5	26673.7	19659.5	15594.4	13448.3	17032.3	21104.4	17860.5	15927.5	20314.6	16753.8
0	1.1649	29729	Q4VAA2	Cdv3	Protein CDV3	1.06705e+06	1.2303e+06	937840	971632	1.06209e+06	1.19261e+06	899677	745477	718297	726633	939740	627388	892717	878863	709252	1.03833e+06	757436	707225	806566	734888
0	1.07261	63894.1	Q4VBD2	Tapt1	Transmembrane anterior posterior transformation protein 1	347126	335850	390570	144610	136074	123929	171030	47194.9	57517.7	178131	81708.8	59810.6	119055	99436.8	131628	144324	9118.05	31879.7	144634	127519
0	1.10865	72399.5	Q501J6	Ddx17	Probable ATP-dependent RNA helicase DDX17	273755	246640	252539	301876	306015	271561	245868	330810	454309	377536	491234	518051	344779	258518	275445	280937	318727	306372	313724	349489
0	1.10101	47057.2	Q504N0	Cpa2	Carboxypeptidase A2	63591.6	47571.9	37540.9	79206.3	84028.7	30717.1	58964.5	16273.9	853001	88417.7	59330.5	36950.3	30016.4	48296.8	11023.3	28348.5	174483	9049.77	47016.6	27749.9
0	1.00552	43825.4;46886.76	Q504N7;Q8BV49	;Pyhin1	Pyrin and HIN domain-containing protein 1-like;Pyrin and HIN domain-containing protein 1	23362.1	19125.2	22011.3	12653.2	16427	8101.82	23386.7	30529	27570	33585.6	38444.5	35286.5	15823.8	15249.5	14775.4	20791.6	11981.8	11114.5	14998.2	16586
0	1.07849	112898	Q505D1	Ankrd28	Serine/threonine-protein phosphatase 6 regulatory ankyrin repeat subunit A	32974.8	21442.1	30845.8	39461.9	42245.8	27770.7	37373.2	35638.7	56543.5	57879.4	42060.3	53529	44286.1	50453.3	30260.8	49658.6	40428.9	36539.1	39265.1	46911.4
0	1.12749	20110.3	Q505D7	Opa3	Optic atrophy 3 protein homolog	265506	262220	557790	515131	477931	505568	455962	483612	423984	406954	477802	484206	508532	563184	514388	587272	481270	442259	484541	423178
0	1.13469	63590.2	Q505F5	Lrrc47	Leucine-rich repeat-containing protein 47	250439	204857	209964	218650	205533	188786	157618	161382	325421	321128	360078	361011	265160	245407	239724	234401	237274	260801	237923	235651
0	1.10246	106862	Q52KI8	Srrm1	Serine/arginine repetitive matrix protein 1	177081	162795	184192	149270	153457	161617	180137	149297	154134	144927	192752	180416	121047	136177	144217	157384	125419	43169.3	102545	132809
0	1.06805	59231.9	Q566J8	Coq8b	Atypical kinase COQ8B, mitochondrial	35651.8	108068	76555	44264.8	48976.2	36483.5	62940.1	37619.5	78051.9	103430	67769.1	61244.7	42459.6	29647.6	7564.79	75120.8	22998.8	32526.7	39697.4	36575.2
0	1.1085	117448	Q569Z5	Ddx46	Probable ATP-dependent RNA helicase DDX46	171836	188460	166181	159428	171080	149362	154163	169264	159641	176508	176179	179269	152124	108304	110770	127257	132274	127845	99882.1	140668
0	1.15579	108178	Q569Z6	Thrap3	Thyroid hormone receptor-associated protein 3	506374	512662	509844	421840	329101	425411	365942	303579	523362	474050	544579	584481	391234	338779	357597	407989	420572	414722	442439	470632
0	1.13518	46119.6	Q570Y9	Deptor	DEP domain-containing mTOR-interacting protein	180391	174574	164081	164638	190071	201185	192877	189676	144535	160295	150029	166239	183476	148260	184298	173836	214724	222457	202277	207170
0	1.1337	57673.5	Q571E4	Galns	N-acetylgalactosamine-6-sulfatase	145922	176523	139955	137937	112560	74182.6	113521	102227	200252	233355	183486	206022	116575	102551	112002	111776	129786	154063	101564	117672
0	1.1752	66365.9	Q571F8	Gls2	Glutaminase liver isoform, mitochondrial	730103	760672	1.08558e+06	1.53953e+06	1.28712e+06	1.00442e+06	1.41265e+06	1195442	1.26114e+06	1.38282e+06	841127	1.05194e+06	1.16888e+06	1.17777e+06	1.43704e+06	1.42911e+06	1700270	1749470	1.81243e+06	2.95724e+06
0	1.15495	84755.8	Q571I9	Aldh16a1	Aldehyde dehydrogenase family 16 member A1	830254	674046	784463	1.04649e+06	1.13562e+06	1.03764e+06	1.07618e+06	1.03481e+06	1.26103e+06	1.24522e+06	1.24588e+06	1123566	1.11831e+06	1.12666e+06	932907	1.00691e+06	1.14687e+06	1.21847e+06	1.21436e+06	1.13511e+06
0	1.12904	146219	Q58A65	Spag9	C-Jun-amino-terminal kinase-interacting protein 4	217204	219216	186113	154516	156417	184843	179382	189678	328888	321472	292791	314414	230543	194211	191375	195927	195769	203020	184268	217506
0	1.14648	19627.8	Q59J78	Ndufaf2	NADH dehydrogenase [ubiquinone] 1 alpha subcomplex assembly factor 2	241660	286052	256425	221143	264024	254120	231324	260638	226981	215677	237033	228984	243000	216584	233545	246920	237534	237339	239811	270982
0	1.05259	52695.7	Q5BKQ4	Pnliprp1	Inactive pancreatic lipase-related protein 1	13581.7	31368.5	20991.4	13817.8	18921.4	12336.5	25374.2	17030.1	92332.9	28225.3	18535.5	12982.6	28258.5	22403.8	13295	13138.3	157622	22417.2	18966.9	12049.7
0	1.13199	141428	Q5BL07	Pex1	Peroxisome biogenesis factor 1	342659	316063	327535	279706	262294	255737	256899	314447	226123	220457	257263	291709	323723	344466	314771	307425	278100	325199	264489	277726
0	1.1156	169103	Q5BLK4	Tut7	Terminal uridylyltransferase 7	24018.9	28742.9	23581	23343.7	23727.1	27536.1	28649.7	25806.1	33765.2	37100.1	43065	44511.5	23049.4	23683.3	23910	23794.6	16119.7	20746.5	20147.7	18063.3
0	1.1569	21862.7	Q5EBG8		Uncharacterized protein C1orf50 homolog	287881	244197	244949	247436	224715	251873	224540	182676	262438	254970	235703	243873	323796	335883	263264	277480	291800	268360	264296	312382
0	1.13695	11655.5	Q5F285	Tmem256	Transmembrane protein 256	158175	176206	188106	171205	165860	181242	233550	219559	122369	178336	81767	117307	108988	112571	126870	127255	123441	141962	136514	150685
0	1.12292	51151.8	Q5F2F2	Abhd15	Protein ABHD15	89184.7	78109.1	107125	120084	127288	99331.3	122061	152754	114859	102890	98778	102984	104226	107193	65277.3	99829.5	82465.4	82609.9	93703.1	83721.1
0	1.16913	34168.4	Q5FW57	Gm4952	Glycine N-acyltransferase-like protein	1.91785e+06	2.06757e+06	2.07733e+06	1.61409e+06	1.94493e+06	1.76315e+06	1.91489e+06	2.22699e+06	1.34629e+06	1.34847e+06	947580	1.48555e+06	1495229	1.55369e+06	1379817	1.30646e+06	2.58947e+06	1.82802e+06	2.15759e+06	1.84699e+06
0	1.18734	20929.9	Q5FW60	Mup20	Major urinary protein 20	5.73692e+06	5686922	4.09767e+06	4.67329e+06	8934278	6468752	6.75988e+06	5496980	3161209	1.69795e+06	9325552	4.3744e+06	13143125	4118189	7.68085e+06	9525794	7.42008e+06	11785864	10834019	8603428
0	1.06488	153801	Q5FWI3	Cemip2	Cell surface hyaluronidase	7110.77	8406.17	4817.4	4716.9	5575.69	4499.56	4181.68	4990.52	7234.91	8188.11	8422.95	8613.11	6208.96	5304.37	6578.78	5313.9	5313.94	5188.22	6686.02	5463.18
0	1.15749	50410.7	Q5FWK3	Arhgap1	Rho GTPase-activating protein 1	142138	153735	125037	139764	164167	137435	136904	96173	380173	407874	445658	426524	244347	224022	175265	178801	220148	216989	184373	182714
0	1.11356	134379	Q5HZI1	Mtus1	Microtubule-associated tumor suppressor 1 homolog	150388	192586	143963	113008	109722	129704	126144	99600.3	79149.7	73475.2	77242.2	65322.2	86805.3	92248.6	100184	111238	87908.9	95388.4	93673.3	87729.6
0	1.01183	18612.4	Q5M8N0	Cnrip1	CB1 cannabinoid receptor-interacting protein 1	38935.4	38143.7	20788.1	17651.1	21272.5	27787.6	21552.3	39328.2	54321.3	65413.1	56045.7	63860.9	31782.7	23634.9	25479.2	24462.6	28793.3	34137.5	18513.6	18130.7
0	1.15406	31458.2	Q5M8N4	Sdr39u1	Epimerase family protein SDR39U1	365767	287008	394015	250630	280546	316149	285750	318601	418653	563746	408382	401695	385843	563489	340884	410722	326861	282951	238226	263516
0	1.03809	211945	Q5ND34	Wdr81	WD repeat-containing protein 81	16847.8	21606.3	20280.1	19366.7	20737.7	23215	19965.1	17535.3	20518.9	29763	23663.3	18057.8	14946.5	16572.9	19984.7	23624.4	12908.1	15149.3	23132.2	14269.1
0	1.14942	69858.9	Q5RKZ7	Mocs1	Molybdenum cofactor biosynthesis protein 1	495355	530377	522877	468023	469318	533257	511744	431779	473018	498602	449386	413343	463144	512546	560520	536563	537598	546910	582091	540211
0	1.12799	14674.5	Q5RL79	Krtcap2	Keratinocyte-associated protein 2	212741	242677	207732	183930	167606	319567	246312	263608	112148	176928	180843	137931	72411.6	88580.1	185674	220213	123886	139184	193405	184077
0	1.01005	55662.5	Q5SRX1	Tom1l2	TOM1-like protein 2	25961.4	17143.5	7970.12	2619.39	24299.5	18600.2	8570.76	19689.2	2952.29	27661.4	28121	2701.88	8721.45	8883.76	16417.7	8866.61	6731.78	5058.39	10235.2	20591.2
0	1.11725	40744.6	Q5SS80	Dhrs13	Dehydrogenase/reductase SDR family member 13	123647	106879	104646	78507	180449	172108	115981	42996.2	187593	176674	169150	85306.1	142234	141692	116188	151878	87198.6	149060	66848.8	78832.2
0	1.1174	328312	Q5SSH7	Zzef1	Zinc finger ZZ-type and EF-hand domain-containing protein 1	24909.3	17004.1	24279.1	32804.4	37626.9	46326	33527.7	45591.7	36811.1	42150.2	35941.8	41322	48915.1	36865.4	40805	37382.5	22157.4	50831.7	40343.4	45930.9
0	1.08414	41873.7	Q5SSK3	Tefm	Transcription elongation factor, mitochondrial	100615	119582	150313	102517	89208.9	102064	135717	118280	51666.4	55149.7	52511.2	51202.9	64943.9	76818.3	85195.4	94364.1	62297.4	55647.6	74735	87790.5
0	1.01415	211197	Q5SSW2	Psme4	Proteasome activator complex subunit 4	20856.4	20526.7	30990.6	12383	38201.9	27320.5	29336.1	16267.2	27690.7	25651.1	31344.6	29715.2	22297.4	24571.9	21814.5	20269.3	23930.5	22310.3	17597.1	19780.3
0	1.09991	31617.4	Q5SUC9	Sco1	Protein SCO1 homolog, mitochondrial	201939	216593	210114	179760	189940	173588	187132	227368	286129	282683	282550	336827	293800	269894	224558	218600	265438	260740	274916	297808
0	1.07525	51450.1	Q5SUF2	Luc7l3	Luc7-like protein 3	180759	219694	217586	164510	126122	131631	139804	134490	138122	105294	155801	124364	131021	110264	140937	138775	94837.6	104315	175788	137825
0	1.12403	144629	Q5SUR0	Pfas	Phosphoribosylformylglycinamidine synthase	242098	242914	220496	196088	235367	185561	177404	181861	265536	222662	250550	261595	191789	173902	171341	192446	157954	180076	165641	200455
0	0.997436	141779	Q5SVR0	Tbc1d9b	TBC1 domain family member 9B	41085.4	25429	11205.9	10478.4	34407.2	49181.3	20878.2	18520.2	19125.8	15038.9	63843.9	14518.9	15410.1	19751.4	6739.66	9153.23	50155.5	51402.5	25973	38336.9
0	1.16539	148068	Q5SW19	Cluh	Clustered mitochondria protein homolog	1.55616e+06	1.53231e+06	1.58252e+06	1.15154e+06	1.23791e+06	1.26266e+06	1.23574e+06	1.11943e+06	1.12186e+06	983924	1.12388e+06	1048742	1.32406e+06	1.32181e+06	1280775	1.31293e+06	1.25921e+06	1.23776e+06	1148240	1.23339e+06
0	1.20615	265257	Q5SWU9	Acaca	Acetyl-CoA carboxylase 1	1.19001e+06	1.33059e+06	1.18034e+06	1.20084e+06	1328936	1.30535e+06	1.34029e+06	1.27646e+06	2791456	1.60708e+06	3256734	1.53791e+06	3.07199e+06	4.70922e+06	3.48651e+06	2864255	1292196	1.68102e+06	1.33493e+06	1186962
0	1.10469	116081	Q5SYD0	Myo1d	Unconventional myosin-Id	215327	215800	218610	204896	152620	133532	176773	141818	339220	395284	484183	563356	224560	181707	203055	272563	197039	201210	274746	290279
0	1.08061	51965.1	Q5SZA1	Slc17a2	Sodium-dependent phosphate transport protein 3	56667.9	31947.4	36967.7	50823.7	73897.1	88760.4	48211	64542.9	37100.1	31966.6	23154.6	29681.2	36284.9	24513.1	41999.9	38163.2	41868.6	42100	57881.6	44158
0	1.04172	59805.9	Q5U405	Tmprss13	Transmembrane protease serine 13	1.19004e+06	11541.1	962730	1.82711e+06	1.48604e+06	1933640	1.47683e+06	741031	1.12147e+06	1.0144e+06	808025	1.00236e+06	883476	1162892	1409905	1.24193e+06	638043	901750	971365	932766
0	1.02999	212757	Q5U430	Ubr3	E3 ubiquitin-protein ligase UBR3	7257.74	51302.4	28563	26987.9	45618.5	46754	9699.3	59260.1	62801.1	54268	38219.5	70482.6	14827.3	18910.8	22151.7	9042.63	2880.73	35306.3	15003.3	41389.7
0	1.16071	63233	Q5U458	Dnajc11	DnaJ homolog subfamily C member 11	946080	1.00476e+06	954643	627902	738022	793566	706185	632300	681975	765226	734689	739862	817662	800782	804165	779944	825359	812954	787526	773392
0	1.16044	42356.6	Q5U5V2	Hykk	Hydroxylysine kinase	1688627	1.5663e+06	1.67263e+06	1.552e+06	1489638	1360661	1.30025e+06	1250108	1.17549e+06	1.21317e+06	997609	1.17875e+06	1.21113e+06	1.3526e+06	1.12472e+06	1.51383e+06	1.46087e+06	1.46581e+06	1.44684e+06	1.56857e+06
0	1.15674	56613.7	Q5XG73	Acbd5	Acyl-CoA-binding domain-containing protein 5	1.20354e+06	1.17146e+06	1.35553e+06	1.12828e+06	1.07979e+06	1.03586e+06	1.06353e+06	1.095e+06	755382	768493	976014	937216	1.11323e+06	1.24131e+06	901259	978626	1.10767e+06	1.00956e+06	1.1392e+06	1.03265e+06
0	1.06288	41963.8	Q5XJY4	Parl	Presenilins-associated rhomboid-like protein, mitochondrial	175459	193441	273840	263615	224872	273599	310873	345300	272233	289440	206847	276159	294049	223522	260820	257074	354791	297430	343095	316524
0	1.14942	57229.4	Q5XJY5	Arcn1	Coatomer subunit delta	2.15783e+06	2.12624e+06	1.92561e+06	1.87527e+06	1.69317e+06	1701422	1.5918e+06	1.64168e+06	2112378	2.07483e+06	2420627	2258562	1.99613e+06	1.82617e+06	1.76271e+06	1.68028e+06	1.85716e+06	1.97211e+06	1.7788e+06	1.77923e+06
0	1.13321	21102	Q5XKN4	Jagn1	Protein jagunal homolog 1	211397	191848	180590	166478	200208	202664	172646	210080	198135	173864	206974	218162	187006	169210	196135	173576	189729	204365	220210	184824
0	1.15195	65681.9	Q5YD48	A1cf	APOBEC1 complementation factor	753071	760360	788569	770294	892505	900397	910005	829237	631978	551541	684652	629377	764752	769182	741273	835129	834350	892992	848894	770963
0	1.08132	204081	Q60575	Kif1b	Kinesin-like protein KIF1B	33107.3	39794.3	31036.8	35529.6	26733.3	33625.6	34628	33529.9	51692.6	42354.6	42635.7	40592.6	33045.6	25624	30872.3	36202.8	36817.1	31299.2	27854.7	34067.1
0	1.16593	23895.3	Q60590	Orm1	Alpha-1-acid glycoprotein 1	770521	2.41433e+06	444284	697288	335507	300567	249701	395956	433382	518356	493466	505104	406016	355202	435827	330706	179433	271459	197975	177997
0	1.1966	116449	Q60597	Ogdh	2-oxoglutarate dehydrogenase complex component E1	2.80063e+06	3040743	3029336	1998965	1.9346e+06	1.93924e+06	2030475	1.95684e+06	2.64548e+06	2.76774e+06	2.52154e+06	2.45532e+06	2.04871e+06	1.98528e+06	1.99777e+06	1.83485e+06	2087964	1.9282e+06	1.95414e+06	2.31304e+06
0	1.1684	61249.8	Q60598	Cttn	Src substrate cortactin	1.41322e+06	1.58651e+06	1.61332e+06	1.42399e+06	1.39639e+06	1.28227e+06	1389885	1.40982e+06	1.65235e+06	1.89605e+06	2.16862e+06	2177804	1.3554e+06	1.29775e+06	1.11048e+06	1.27505e+06	1.15215e+06	1.22297e+06	1.15714e+06	1.27753e+06
0	1.1645	16930	Q60605	Myl6	Myosin light polypeptide 6	1.68105e+06	1171203	1.57288e+06	1.7905e+06	1.2836e+06	1.15389e+06	1.77227e+06	1.99665e+06	1.60766e+06	1670397	3.3671e+06	4.03538e+06	1267979	1.15492e+06	1.44252e+06	1.90208e+06	926058	909637	1.53087e+06	1397609
0	1.13077	25238.4	Q60631	Grb2	Growth factor receptor-bound protein 2	464143	383330	439372	413754	463065	444604	346554	351733	557105	593459	594238	650670	432924	518158	344135	408251	400058	397890	387928	455183
0	1.14164	47038	Q60634	Flot2	Flotillin-2	272950	266957	258821	291462	225849	206470	242339	246152	310043	319047	297045	358981	278559	222628	234296	241438	235461	242487	257939	261522
0	1.1507	20824.2	Q60648	Gm2a	Ganglioside GM2 activator	261690	230161	195883	342245	396430	341747	319670	283737	679400	622100	877750	472265	475271	506726	532945	561385	274067	309010	349771	287140
0	1.09959	76003.7	Q60649	Clpb	Caseinolytic peptidase B protein homolog	301652	275038	273157	201655	208334	169553	200048	184914	259568	235187	252212	250589	248399	228317	268113	238293	242351	229244	282565	224236
0	1.17906	38354.1	Q60668	Hnrnpd	Heterogeneous nuclear ribonucleoprotein D0	3.28559e+06	3.06072e+06	2930751	2458749	2.10231e+06	2.06089e+06	2.54247e+06	2.55706e+06	3.43256e+06	3.15531e+06	3.28412e+06	4.06628e+06	2375207	1973861	1.94291e+06	1.9233e+06	2.86325e+06	2.82634e+06	2.56844e+06	3027314
0	1.12685	56876.6	Q60676	Ppp5c	Serine/threonine-protein phosphatase 5	173996	172055	201684	232624	254084	262457	266768	270690	254664	257304	264008	236326	242402	218941	206561	239012	221626	229139	216861	215049
0	1.06189	84728.9	Q60680	Chuk	Inhibitor of nuclear factor kappa-B kinase subunit alpha	91093.7	96412.2	70690.2	78248.2	67898.6	90557.5	33997.7	67354.8	60073.8	60052.7	57803.8	51916.3	51616.7	55454.7	40259	55537.7	44639.2	53486.1	50576.7	47428.3
0	1.17197	25378.7	Q60692	Psmb6	Proteasome subunit beta type-6	1.30532e+06	1.47051e+06	1.33486e+06	1.40898e+06	1.33565e+06	1.42425e+06	1.41373e+06	1.37586e+06	1.36797e+06	1.41489e+06	1.29658e+06	1.36399e+06	1.32338e+06	1.35656e+06	1.34811e+06	1.27858e+06	1.07114e+06	1.10751e+06	1.09952e+06	1.09952e+06
0	1.15132	75893.1	Q60710	Samhd1	Deoxynucleoside triphosphate triphosphohydrolase SAMHD1	640526	774903	591692	444215	573278	534358	521516	489846	816869	1.02545e+06	918859	950075	498957	441221	429980	452042	477165	476493	402798	570622
0	1.10889	45133.5	Q60737	Csnk2a1	Casein kinase II subunit alpha	109446	99878.2	123900	122037	78268	83212.2	107280	123526	107569	109456	120371	126201	107501	99596.6	98607.1	110452	86996.2	84755.6	96888.2	95306.1
0	1.06249	39740.3	Q60739	Bag1	BAG family molecular chaperone regulator 1	43154.5	43735.8	51149.6	31207.5	44994	25087.8	11619.9	27530	102845	52428.6	66570	81629.8	46430.2	24292.8	49601.1	30926.3	32721.9	39275.2	25849.4	29039.5
0	1.1331	48370.6	Q60749	Khdrbs1	KH domain-containing, RNA-binding, signal transduction-associated protein 1	507499	517441	501557	382997	366450	271800	376990	325096	709888	590561	862298	879072	490780	356826	391531	373155	460654	391285	377824	440216
0	1.17042	48605.8	Q60759	Gcdh	Glutaryl-CoA dehydrogenase, mitochondrial	6152834	6.35238e+06	6085209	6080785	5797771	6350223	6.59734e+06	6154084	5.11435e+06	5519004	4.15816e+06	5382388	6.08063e+06	6.5031e+06	6.35379e+06	6.33698e+06	8449854	9004713	8311102	8781312
0	1.14614	46551.8	Q60766	Irgm1	Immunity-related GTPase family M protein 1	596615	555258	737549	585259	616046	707608	633056	629376	561281	589293	605349	663210	489886	565305	620304	623301	464454	491510	554766	598935
0	1.12589	67942.5	Q60770	Stxbp3	Syntaxin-binding protein 3	210228	222540	212269	170910	165281	133108	154054	93785.8	226851	243292	205664	279354	147279	150179	149113	164877	185248	183270	206210	204310
0	1.09853	18066.4	Q60772	Cdkn2c	Cyclin-dependent kinase 4 inhibitor C	46575.4	49061.6	36208.6	46392.6	46221	34415.1	37357.5	38662.4	50014.1	68234.4	43748.3	58716.3	53312.2	55602	9297.45	55482.7	24990	27577.2	12994.3	15238
0	1.12404	55741.7	Q60823	Akt2	RAC-beta serine/threonine-protein kinase	102427	98548.3	89866.3	109215	113927	93946.3	97990.8	89218.3	94715.6	110640	92828.6	85398.6	106766	105317	100970	128220	86047.2	90302.3	86908.8	78502
0	1.14014	42598.9	Q60854	Serpinb6	Serpin B6	276435	241527	184588	173878	235561	274796	206032	196024	731920	850289	962074	719924	391325	288651	266481	290297	262317	219066	212217	282499
0	1.09524	74854.5	Q60855	Ripk1	Receptor-interacting serine/threonine-protein kinase 1	64011.3	59090	78623.1	96623.1	89179	84110	90397.6	89018.4	101169	123320	116318	117300	95408	100428	66549.5	77663.6	44845.3	69655.6	31260.2	56065.3
0	1.17089	62582.1	Q60864	Stip1	Stress-induced-phosphoprotein 1	1.4942e+06	1.38359e+06	1.35857e+06	1.77334e+06	2.09619e+06	1856053	1.73784e+06	1.79635e+06	1.84226e+06	1.49769e+06	1.88185e+06	1.62373e+06	2.01481e+06	1.9518e+06	1.81597e+06	1925659	1.82825e+06	1.74998e+06	1687674	1.69799e+06
0	1.14299	78168.9	Q60865	Caprin1	Caprin-1	726032	621185	677538	619348	571404	559259	637748	619058	510257	481249	614119	525665	522517	609138	586868	582012	506119	492114	476294	524441
0	1.17598	39218.1	Q60866	Pter	Phosphotriesterase-related protein	1.44956e+06	1.5034e+06	1.5706e+06	2168236	2.29785e+06	2347860	2283744	2.68726e+06	2.72654e+06	2.83667e+06	2.84388e+06	2.68363e+06	2.99006e+06	2.47744e+06	2.27952e+06	2.30708e+06	1548775	1914061	1.60207e+06	2.08098e+06
0	1.0983	21050.7	Q60870	Reep5	Receptor expression-enhancing protein 5	71831.6	62556.7	38807.5	56855.2	51937.7	58962.1	22143.2	36184.4	109218	88897.7	103826	97857.5	32617	37336.2	45211.8	45122.3	52731.6	27539.8	33699.5	27744.9
0	1.11308	16502.4	Q60872	Eif1a	Eukaryotic translation initiation factor 1A	162672	147642	168640	117972	143860	119044	129083	56812.6	169880	167132	152395	160351	96654.9	94602	135428	103870	127140	122968	115771	112708
0	1.12174	12324.8	Q60876	Eif4ebp1	Eukaryotic translation initiation factor 4E-binding protein 1	300970	286998	240987	141611	192832	234680	148186	179982	351138	310777	309471	318402	227622	192573	86280	167072	192383	180793	97801.9	146379
0	1.12964	99308.7	Q60902	Eps15l1	Epidermal growth factor receptor substrate 15-like 1	92502.6	93963.9	72800.4	65778	64532.9	70590.8	60321.6	49522.4	83882.3	102196	81073.8	74032.8	63613.1	45419.3	59800.1	69923.5	57381.2	53796.6	51760.8	60774.7
0	1.17333	31732.8	Q60930	Vdac2	Voltage-dependent anion-selective channel protein 2	2.24945e+06	2.2846e+06	2.34934e+06	1.72639e+06	2.07045e+06	2.14347e+06	2137448	2.14619e+06	2.24659e+06	2.55412e+06	2.23562e+06	2.32631e+06	2205946	2.17113e+06	1.90215e+06	2.05368e+06	1.71586e+06	1.7645e+06	1.96166e+06	2.13037e+06
0	1.17105	30752.7	Q60931	Vdac3	Voltage-dependent anion-selective channel protein 3	2.97292e+06	3.15148e+06	2.89375e+06	2151771	2.85649e+06	2920333	2.94051e+06	2.66763e+06	3.28375e+06	3565277	3.13084e+06	3112532	3192674	3331290	3.03101e+06	3025361	2.74683e+06	2.93353e+06	3.10887e+06	3.14795e+06
0	1.17905	32351.5	Q60932	Vdac1	Voltage-dependent anion-selective channel protein 1	6648001	7.70192e+06	6983112	5.82255e+06	4.58177e+06	5020841	8161032	6191721	7.59331e+06	8563032	6876657	7.34773e+06	7587995	8029254	7242507	7.60749e+06	6880420	7.24138e+06	7.78752e+06	8856518
0	1.1647	71743	Q60936	Coq8a	Atypical kinase COQ8A, mitochondrial	446141	382010	584332	680428	944365	891210	1.00016e+06	948683	862344	877542	826954	904856	1443119	1.46313e+06	1.44965e+06	1.52565e+06	1.2137e+06	1.02897e+06	1.20054e+06	1.15233e+06
0	1.1131	98242.1	Q60953	Pml	Protein PML	30691.3	39789.5	37422.9	27018.5	36968.5	28158	30668.5	23323.7	57712.7	51697.6	67526.2	55597.5	35177.5	31245	30155.5	45048	28605.5	29361.5	32824.9	35441.1
0	1.10813	60182.6	Q60960	Kpna1	Importin subunit alpha-5	147687	153554	223599	251043	296704	208922	296307	228082	225080	263543	253193	246783	288149	282976	205227	202002	224945	284956	242215	248914
0	1.14382	47655.7	Q60972	Rbbp4	Histone-binding protein RBBP4	560456	587368	524776	481351	454413	373898	395122	386474	742840	656622	760084	715812	525955	419597	411010	474322	447612	456848	492600	514765
0	1.11055	47790.1	Q60973	Rbbp7	Histone-binding protein RBBP7	135821	154814	189355	160310	49724.5	74092.9	125370	103658	108005	117809	82880.3	108758	73890.5	65202.7	69746	79675.2	8663.15	21239.5	47020.6	11544
0	1.05906	270642	Q60974	Ncor1	Nuclear receptor corepressor 1	28591.2	36648.5	33804.5	24027.1	17245.1	13495	16647.5	19227.7	18389.5	22099.2	21352.7	18168	22922.6	16864.4	12661.4	13638.3	8792.7	9101.24	6670.92	6004.61
0	1.15	58470.3	Q60991	Cyp7b1	Cytochrome P450 7B1	526961	461705	369527	401694	802274	808238	667108	539904	91858	75565.9	75031.2	74553.5	291607	82717	217584	278767	1.12146e+06	1.11762e+06	1.28274e+06	728687
0	1.02631	26809	Q60994	Adipoq	Adiponectin	12282.6	15648.7	12462.3	14406.3	21250.8	12396.5	17784.2	22357.3	23262.1	29819.4	16130.1	17346.8	14335.9	14556.1	9672.08	15715.9	15215.4	8083.68	16309	13330.1
0	1.17211	56754	Q61009	Scarb1	Scavenger receptor class B member 1	618937	579472	774848	914205	937294	838434	905248	784937	796333	781698	664556	748764	662412	715061	829408	1.02777e+06	610795	509855	733801	664062
0	1.04572	64282.7	Q61024	Asns	Asparagine synthetase [glutamine-hydrolyzing]	30789.2	44114.8	46005.2	35531.8	33483.6	62608.5	27055.2	29784.1	78976.2	55118.9	49942.1	88626.6	25418	49431.5	55833.8	23212.1	93697.7	43050.6	20382.7	68502.2
0	1.20197	50372.7	Q61029	Tmpo	Lamina-associated polypeptide 2, isoforms beta/delta/epsilon/gamma	889181	992709	1066503	896471	945585	780455	906274	1.07378e+06	1.72396e+06	1.46976e+06	1.69646e+06	1.97535e+06	1.11174e+06	1.06328e+06	812608	894453	825838	796900	845863	967108
0	1.09094	75168.3	Q61033	Tmpo	Lamina-associated polypeptide 2, isoforms alpha/zeta	162732	158653	203746	137796	83842.2	90904.8	161626	179732	176324	198733	297787	276485	109166	99772.4	119228	129245	70337.7	70844.3	112182	139677
0	1.16995	57432.3	Q61035	Hars1	Histidine--tRNA ligase, cytoplasmic	837454	808978	717791	742754	807259	809217	773774	739576	1.02935e+06	1007378	1.05727e+06	952150	940154	836057	878695	840014	848584	879683	778554	840896
0	1.06671	92079.4	Q61072	Adam9	Disintegrin and metalloproteinase domain-containing protein 9	27478.3	30433.1	24596.3	29757.6	29394	34804.8	30223.4	34638.7	44682	45012.9	46436.4	44399.9	28280.5	20947.7	22518.5	23078.1	8782.08	19742.8	21222	24606.4
0	1.10477	58728.1	Q61074	Ppm1g	Protein phosphatase 1G	96697.6	117132	117083	104605	108778	110103	74711.4	50412.1	142599	127551	126956	135555	101875	88961.1	86432.7	68028	105515	94523.8	89348.9	97952.3
0	1.13553	44593.4	Q61081	Cdc37	Hsp90 co-chaperone Cdc37	206866	192208	197813	245957	265757	278916	279943	262659	357329	314831	340140	366447	336389	316731	312796	289080	309037	326108	245848	309517
0	1.12177	65304.6	Q61093	Cybb	Cytochrome b-245 heavy chain	41294.6	53060.2	43454.8	48821.5	48389.1	53273.9	54425.8	62439.7	149741	171204	183566	203864	59832.1	52110.4	25590.5	47224.6	48633.6	63582.8	41725	56251
0	1.12954	27625.7	Q61096	Prtn3	Myeloblastin	57488.5	120709	31937.4	31109.3	12294.5	11044.8	15137.3	91045.6	122661	141169	163095	244762	7447.69	5505.48	10077.9	13279.4	11019	2324.85	9311.75	14147.8
0	1.14794	82580.9	Q61102	Abcb7	Iron-sulfur clusters transporter ABCB7, mitochondrial	1.33805e+06	1.44692e+06	1.61267e+06	1347509	1.44909e+06	1.53777e+06	1.64051e+06	1.47051e+06	1.35058e+06	1.43865e+06	1.44844e+06	1.35423e+06	1.44259e+06	1.38224e+06	1.58596e+06	1.41718e+06	1363671	1.1914e+06	1.43475e+06	1.35572e+06
0	1.0611	70801.3	Q61107	Gbp4	Guanylate-binding protein 4	75257.5	62321.3	58282	22794.5	50105.9	56254	19881.8	15184.5	133181	150965	127206	94710.2	78027.4	72265.4	75209.6	78491.8	73700.5	68879.8	52993	89647.8
0	1.02757	42064	Q61112	Sdf4	45 kDa calcium-binding protein	47007.2	65169.1	59809.5	13774.2	34603.6	39414.6	41981.4	23430.3	31327.7	45553.6	28710.4	30586.5	8436.75	8484.32	12308.6	36912.2	10180.2	17284.2	20549.5	22813.1
0	1.13019	67260.5	Q61129	Cfi	Complement factor I	434610	445919	324907	505716	460543	354931	299141	392064	670831	661070	660548	617472	378526	356441	292577	279168	323358	344064	330397	430606
0	1.17376	27634.2	Q61133	Gstt2	Glutathione S-transferase theta-2	2.36268e+06	2.08532e+06	2.21866e+06	2.19699e+06	1.77942e+06	1.93213e+06	2.25526e+06	1.81168e+06	1.98467e+06	2.12953e+06	1.59062e+06	1.83048e+06	2.12004e+06	2189022	2.95033e+06	3.14319e+06	2.26465e+06	1.79055e+06	2.29409e+06	1.75342e+06
0	1.00781	94284.9	Q61140	Bcar1	Breast cancer anti-estrogen resistance protein 1	19906.1	8099.08	10208.8	6801.29	6036.14	19131.7	8268.48	15677.1	11172.6	12383.5	4867.36	17972	7247.4	7263.64	13142	6493.03	21782.7	7693.05	11981.1	20168.9
0	1.0611	49983.2	Q61144	Psen2	Presenilin-2	34172.2	34640.3	47326.5	29373.1	42394.2	40773.3	30058.6	46093.8	49743	49197.3	51754.3	56610.5	57307.6	36879.3	39164	25272.6	50419.9	56391.6	42690.2	64651.5
0	1.18206	121151	Q61147	Cp	Ceruloplasmin	801174	1.46487e+06	672645	865486	509975	425364	403481	510106	1.94355e+06	2.03273e+06	1.70307e+06	2.27329e+06	518077	473344	448597	479209	349249	413808	414948	497401
0	1.07445	54713.4	Q61151	Ppp2r5e	Serine/threonine-protein phosphatase 2A 56 kDa regulatory subunit epsilon isoform	68324.8	71455.8	81209.6	81486.7	96626.8	111748	111083	91294.4	100039	89982.1	105601	106022	82550.1	84117.3	70853.7	82509.1	67345.2	67866.2	83353.4	73243.4
0	1.00524	83745.4	Q61164	Ctcf	Transcriptional repressor CTCF	11672.5	15544	26857.5	15868.5	26941.6	24850.7	9894.43	5971.94	9356.62	16347.4	3053.43	13936.3	12845	6038.13	22557.9	12996.4	2915.21	1895.41	6860.02	7792.98
0	1.13512	30016.2	Q61166	Mapre1	Microtubule-associated protein RP/EB family member 1	437830	521219	458981	504381	525103	615657	500764	723682	559122	638120	682205	703324	403832	391012	345209	384003	395426	368822	359335	400327
0	1.18979	21778.7	Q61171	Prdx2	Peroxiredoxin-2	10112229	8.35289e+06	8644075	7.67597e+06	7951630	7.4259e+06	7.13613e+06	7353500	9276574	9335262	8756059	9109386	7.97656e+06	7525034	6.83134e+06	7113106	7.54473e+06	7051404	6.30996e+06	8181047
0	1.21172	34807.9	Q61176	Arg1	Arginase-1	70431568	66156816	61922568	52041404	44105612	46524420	42856116	40923780	49938508	55192208	46101792	50711572	42499416	46584204	38558192	41101968	48971996	58067204	48478292	70491056
0	1.10103	44123.6	Q61187	Tsg101	Tumor susceptibility gene 101 protein	801980	792256	755322	690770	773613	679623	693948	598147	844174	830156	694251	664322	683200	616172	559342	570879	608461	583288	591656	620406
0	1.12864	210437	Q61191	Hcfc1	Host cell factor 1	58721.9	66301.1	56031.7	51802.1	51394.5	49141	39083.7	44135.6	114430	100154	129828	128965	87809.3	74799.8	20649.4	53295.3	71937	76517	65096.3	87031.8
0	1.13859	25853.4	Q61205	Pafah1b3	Platelet-activating factor acetylhydrolase IB subunit alpha1	127022	97699.5	110093	98408.2	115232	76502.3	94508.9	73979	374629	336311	370896	372319	279380	220236	218569	174703	147983	139237	136929	157236
0	1.14095	25581.3	Q61206	Pafah1b2	Platelet-activating factor acetylhydrolase IB subunit alpha2	574522	466804	481861	484195	411281	452168	477009	357060	612194	672737	607395	604447	501437	435204	560300	515862	392698	342707	332686	374038
0	1.19169	61422.1	Q61207	Psap	Prosaposin	15250897	14698683	12515306	12332596	11332784	9919555	8767708	10184582	21453316	24612456	27432050	26232508	11869009	10490162	10428009	10489324	11923731	12184000	9708235	11940005
0	1.11241	102804	Q61210	Arhgef1	Rho guanine nucleotide exchange factor 1	197290	230859	199968	228538	249872	277505	249676	227690	259057	285192	258957	264455	220636	163993	67034.4	158903	152594	171579	172631	196931
0	0.984749	62829.8	Q61211	Eif2d	Eukaryotic translation initiation factor 2D	40578.8	37887.6	45149	41705.1	44295.7	73217.9	81158.4	19785.3	88540.4	104119	108568	100098	84002.6	81574	84873.9	71235	60838	64923	71625.4	55760.7
0	1.16966	70149.3	Q61233	Lcp1	Plastin-2	2412461	2446001	2163650	2.2207e+06	2.27525e+06	2.49715e+06	2.17971e+06	2.4359e+06	5284598	5900502	5.69405e+06	5.90251e+06	3091438	2.45454e+06	2.28496e+06	2.64124e+06	2304358	2.73147e+06	2188505	2.73335e+06
0	1.15026	56381.7	Q61235	Sntb2	Beta-2-syntrophin	1.27905e+06	1.29771e+06	1.42579e+06	1.39445e+06	1562781	1.53582e+06	1.62024e+06	1.78646e+06	1.21011e+06	1.32782e+06	1.42778e+06	1.44245e+06	1.21798e+06	1.33691e+06	1202981	1.25889e+06	1.05793e+06	1.05314e+06	1.13472e+06	1.18605e+06
0	1.05754	44013.3	Q61239	Fnta	Protein farnesyltransferase/geranylgeranyltransferase type-1 subunit alpha	76687.5	84151.4	46819.4	76996.3	80587.3	56981.7	70594.7	67811.8	140690	143026	154984	134751	103312	113188	87267.2	83765.5	82492.6	94535.4	76792.7	89510
0	1.1412	54971.9	Q61247	Serpinf2	Alpha-2-antiplasmin	935870	994230	855508	880819	636250	602250	524461	631165	513325	490857	404368	517492	347213	272270	319024	353932	330670	360108	406405	447570
0	1.0917	38970.9	Q61249	Igbp1	Immunoglobulin-binding protein 1	158347	165378	142190	137931	137970	152422	141246	158835	197793	201797	180396	161234	174042	171357	205089	137126	185095	210956	159283	189195
0	1.12237	14288.5	Q61268	Apoc4	Apolipoprotein C-IV	1.21578e+06	1.19171e+06	707800	421098	144265	171024	242603	184328	548569	452074	465036	414569	459966	238048	240429	195839	249557	278439	89107.7	149980
0	1.07781	83457.4	Q61285	Abcd2	ATP-binding cassette sub-family D member 2	9025.12	10932.3	25815.9	26468.6	11279.4	18231	11928.7	11667.7	60631.9	56492.1	52022.3	62175.1	29130.1	44647.5	25064.9	25107.4	17064.8	22492.6	12215.5	58964.5
0	1.19166	94132.6	Q61316	Hspa4	Heat shock 70 kDa protein 4	2.05631e+06	1.99775e+06	1.75521e+06	1.91964e+06	2.10512e+06	2.20891e+06	2.14661e+06	2.26958e+06	2.35679e+06	2.20406e+06	2.39879e+06	2.39681e+06	2.1456e+06	2.07802e+06	1.98472e+06	2.08662e+06	1.99445e+06	1.98016e+06	1.89198e+06	1.82701e+06
0	1.16302	27956.5	Q61335	Bcap31	B-cell receptor-associated protein 31	1.49496e+06	1.3411e+06	1.51924e+06	1.57467e+06	1464433	1.63112e+06	1.54691e+06	1667189	2.04462e+06	1.66961e+06	1942424	2298641	1.89237e+06	1.66489e+06	1852837	1915368	2.02155e+06	1.99327e+06	2.00355e+06	2.21591e+06
0	1.06738	12399.4	Q61387	Cox7a2l	Cytochrome c oxidase subunit 7A-related protein, mitochondrial	107211	106351	66381.2	110106	97197.4	98916.1	72732.6	51602.2	112613	65734.3	82333.7	58610	127898	118961	117668	121624	115129	150739	155285	109782
0	1.09758	122154	Q61409	Pde3b	cGMP-inhibited 3',5'-cyclic phosphodiesterase 3B	47707.1	32062.7	40558	64185.9	65843.1	94149.7	76889	82512.6	67957	47318.5	73162.3	58036.9	65551.4	63996.2	47038.3	59406.8	62957	57256.8	60954.8	62072.1
0	1.12109	66935.6	Q61419	Cmah	Cytidine monophosphate-N-acetylneuraminic acid hydroxylase	304737	342993	304965	304787	382156	364276	324479	337018	82257.3	31557.7	77297.7	37826.4	223459	164500	222013	234956	233038	244139	245264	232888
0	1.19556	34463.9	Q61425	Hadh	Hydroxyacyl-coenzyme A dehydrogenase, mitochondrial	14462959	14003639	13183108	12728339	12352815	11380402	10628963	10983883	14796873	13768303	13017246	15489912	15898095	18461482	14631998	13868449	16887540	15555575	14581936	14360931
0	1.12201	20748.2	Q61462	Cyba	Cytochrome b-245 light chain	109567	74358.6	50253.3	22495.1	20266.5	25684.3	52867.2	21928.1	503711	505731	575218	518363	97557	54287.6	39880.4	42920.6	67192.3	64383.5	22933.1	77745.9
0	1.02105	218134	Q61464	Znf638	Zinc finger protein 638	33604.6	40549.6	37362.3	38902.1	33664.2	28702.3	44936.5	30090.2	16320.7	24401.5	33544.3	34295.5	19576.2	6149.53	25267.4	25630.2	10085.1	6858.21	14773.3	21237.2
0	1.08967	31891.7	Q61469	Plpp1	Phospholipid phosphatase 1	41184.7	57279.8	56515.3	34047.2	21576.3	39547.4	39833.3	24889.4	24368.4	31048.9	28334.4	23906.2	31232.8	31798.8	30752.8	26774.9	37366.5	25651	21259.1	15634.4
0	1.15315	65092.1	Q61490	Alcam	CD166 antigen	368004	360087	370017	324649	348892	333477	327000	296433	845685	769397	871395	929334	450978	332624	362744	321745	387108	354833	393460	503550
0	1.11747	62832.2	Q61508	Ecm1	Extracellular matrix protein 1	374045	389048	492813	210703	389628	387575	417519	397586	484324	543362	502368	562041	405334	397210	333968	407202	450513	433354	419608	494906
0	1.13051	71726.3	Q61510	Trim25	E3 ubiquitin/ISG15 ligase TRIM25	248470	265277	253334	188323	208223	191504	217473	235489	216227	213044	259443	231483	185157	185254	141314	169681	172148	192172	181220	184898
0	1.14148	133734	Q61543	Glg1	Golgi apparatus protein 1	160264	135825	137709	160051	157646	179701	171092	153630	459079	436636	548381	534754	264126	177123	203886	212452	198666	189101	186762	235490
0	1.14285	68462.2	Q61545	Ewsr1	RNA-binding protein EWS	379444	390215	411701	369930	353631	359270	338840	325695	203521	233318	290365	276688	205826	225539	157156	234800	209660	238052	215453	235278
0	1.17494	72083	Q61550	Rad21	Double-strand-break repair protein rad21 homolog	233837	261886	253183	211614	185403	175862	217918	190709	246847	240334	325951	281977	154055	135844	163025	223153	145089	125042	202060	187954
[truncated: 2,407 more rows]

## Sheet: TOTAL PROTEIN
PG.Genes	PG.MolecularWeight	PG.ProteinDescriptions	[1] A3.raw.PG.Quantity	[2] A4.raw.PG.Quantity	[3] A5.raw.PG.Quantity	[4] A6.raw.PG.Quantity	[5] AH1.raw.PG.Quantity	[6] AH2.raw.PG.Quantity	[7] AH3.raw.PG.Quantity	[8] AH4.raw.PG.Quantity	[9] D2.raw.PG.Quantity	[10] D3.raw.PG.Quantity	[11] D4.raw.PG.Quantity	[12] D10.raw.PG.Quantity	[13] H1.raw.PG.Quantity	[14] H2.raw.PG.Quantity	[15] H6.raw.PG.Quantity	[16] H7.raw.PG.Quantity	[17] N1.raw.PG.Quantity	[18] N2.raw.PG.Quantity	[19] N3.raw.PG.Quantity	[20] N4.raw.PG.Quantity
[truncated: 4,096 more rows]

[truncated: 2 more sheets: DDC VS Control, ANIT VS Control]
